# Supplementary material for: Ancient Bottleneck events, natural selection, and increased risk of maladaptation shape the past, present and future population structure of a widespread conifer
Source: Research Square preprint supplement (doi:10.21203/rs.3.rs-8614253/v1), 2026-02-03
Supplement: Supplementary file 1 [file 33ee71244c471789aad4e798.xlsx]

## Sheet: Table S1
Supporting Information Table S1. Coordinates and Climate Data used for gradient forest and GEA analyses. Climate data is from the 1961-1990 averages. ID represents the unique sample ID, Site represents the collection location. Dataset shows which dataset these samples belong to. Region shows State level location, Lat shows latitude, long shows longitude, Elevation shows Elevation in Meters. Full …
	ID	Site	Dataset	Region	Lat	Long	Elevation	TD_12	Elevation	PPT_wt_1	PPT_sm_1	MSP_12	PPT_at_1	AHM_12	RH_sp_12	RH_sm_12	PPT_sp_1	Tmin_sm_1	Tmin_wt_1	Rad_wt	Rad_sp	Rad_sm	Rad_at	PAS_wt_1	Eref_wt	Eref_sp	Eref_sm	Eref_at	DD_0_wt	DD_0_sp	DD_0_sm	DD_0_at	DD5_wt	DD5_sp	DD5_sm	DD5_at	CMD_wt	CMD_sp	CMD_sm	CMD_at
1	PP_P5S_CP_3	P5S CP	1	Colorado	39.2908	-108.492	1962.13	26.7	1962.13	83	69	134	118	49	58	57	108	12.8	-8.5	106	217	262	157	47	0	258	469	194	371	42	0	30	17	368	1403	516	0	150	399	83
2	PP_UT_3	UT	1	Utah	37.505	-112.615	2481.07	21.4	2481.07	153	104	181	144	28.2	53	53	126	6.8	-11	108	225	262	160	107	0	179	418	185	455	117	0	65	2	133	898	276	0	119	315	65
3	PP_AZ_Cherry_2	AZ Cherry	1	Arizona	34.347	-112.041	1610	21.2	1610	133	124	181	119	56.7	50	54	79	17.1	-0.7	99	224	249	149	2	152	394	591	304	36	4	0	2	258	850	1887	1081	20	314	467	186
4	PP_CO_WRFO83_1	CO WRFO83	1	Colorado	39.5832	-108.172	2492.78	24.4	2492.78	99	83	161	135	36.3	61	60	119	10.5	-9.5	104	215	262	153	72	0	172	405	139	484	107	0	68	6	201	1119	354	0	95	322	50
5	PP_AZ_FUTS_4	AZ FUTS	1	Arizona	35.0954	-111.411	2105	22	2105	134	148	213	132	35.9	45	48	98	9.1	-8.9	109	227	251	158	47	42	309	510	246	245	39	0	22	29	316	1223	490	0	211	363	114
6	PP_AZ_FUTS_2	AZ FUTS	1	Arizona	35.0919	-111.414	2105	22	2105	134	148	213	132	35.9	45	48	98	9.1	-8.9	109	227	251	158	47	42	309	510	246	245	39	0	22	29	316	1223	490	0	211	363	114
7	PP_CO_UP_3	CO UP	1	Colorado	38.743	-108.55	2180.04	25.9	2180.04	59	116	174	82	54	56	56	70	11.4	-9.3	100	218	262	153	35	0	252	462	192	390	55	0	38	15	305	1294	457	0	182	345	111
8	PP_SD_BHNF_3	SD BHNF	1	South Dakota	43.5655	-103.231	1408.18	28.1	1408.18	32	187	297	73	42.7	52	53	143	12.9	-10.6	74	178	233	116	20	0	260	488	190	425	55	0	32	13	394	1494	528	0	117	301	117
9	PP_NM_SFE_3	NM SFE	1	New Mexico	35.4033	-105.538	2300	22	2300	57	209	307	123	41.2	45	50	83	10.6	-8.1	107	217	248	151	16	43	331	516	245	211	27	0	20	42	431	1329	552	27	248	308	122
10	PP_P4_CP_3	P4 CP	1	Colorado	39.296	-108.502	1989.6	26.7	1989.6	83	69	134	118	49	58	57	108	12.8	-8.5	106	217	262	157	47	0	258	469	194	371	42	0	30	17	368	1403	516	0	150	399	83
11	PP_ID_CRD_2	ID	1	Idaho	45.5592	-115.553	1200	21	1200	302	173	316	207	12.2	48	43	246	1.2	-14	85	187	261	137	274	0	86	383	116	705	246	1	171	0	37	560	118	0	0	210	21
12	PP_PIS_CP_3	P1S CP	1	Colorado	39.2945	-108.52	2045.49	26.7	2045.49	83	69	134	118	49	58	57	108	12.8	-8.5	106	217	262	157	47	0	258	469	194	371	42	0	30	17	368	1403	516	0	150	399	83
13	PP-CA_SN_North_4	CA SN North	1	Sierra Nevada	39.9284	-120.927	1286.53	18.7	1286.53	554	40	107	302	17.1	53	45	265	8.7	-3.5	77	196	268	138	69	86	278	509	220	120	25	0	12	54	342	1238	585	0	113	468	84
14	PP_P4_CP_1	P4 CP	1	Colorado	39.295	-108.499	1989.6	26.7	1989.6	83	69	134	118	49	58	57	108	12.8	-8.5	106	217	262	157	47	0	258	469	194	371	42	0	30	17	368	1403	516	0	150	399	83
15	PP_CA_SN_South_2	CA SN South	1	Sierra Nevada	37.2871	-119.402	942.88	16.7	942.88	559	25	76	200	17.4	59	58	325	10.4	-2.8	110	233	293	181	57	97	246	431	206	102	36	0	11	67	255	1152	561	0	76	406	112
16	PP_CA_HR_2	CA HR	1	California	35.6916	-121.091	887.144	13.1	887.144	496	2	45	189	27.7	60	53	196	12.1	3.8	98	211	259	150	3	130	319	511	271	19	5	0	1	370	677	1421	1012	0	175	509	135
17	PP_WA_M.Vance_1	WA MV	1	Washington	45.9424	-121.051	671.302	19.7	671.302	329	45	92	162	27.8	58	49	121	8.2	-3.9	63	184	258	120	94	22	232	439	156	212	29	0	27	17	301	1115	449	0	129	394	72
18	PP_ID_CRD_3	ID	1	Idaho	45.5578	-115.553	1200	21	1200	302	173	316	207	12.2	48	43	246	1.2	-14	85	187	261	137	274	0	86	383	116	705	246	1	171	0	37	560	118	0	0	210	21
19	PP_CA_SN_South_1	CA SN South	1	Sierra Nevada	37.29	-119.41	942.88	16.7	942.88	559	25	76	200	17.4	59	58	325	10.4	-2.8	110	233	293	181	57	97	246	431	206	102	36	0	11	67	255	1152	561	0	76	406	112
20	PP_WA_M_Vance_4	WA MV	1	Washington	45.9837	-121.097	671.302	19.5	671.302	374	47	97	179	24.2	58	50	135	8	-4.2	36	164	239	85	120	22	226	427	152	229	34	0	31	12	270	1069	420	0	117	380	63
21	PP_SD_BHNF_1	SD BHNF	1	South Dakota	43.5609	-103.235	1408.18	28.1	1408.18	32	187	297	73	42.7	52	53	143	12.9	-10.6	74	178	233	116	20	0	260	488	190	425	55	0	32	13	394	1494	528	0	117	301	117
22	PP_OR_OCH_2	OR OCH	1	Oregon	44.3606	-120.457	1279.69	19.5	1279.69	124	63	112	105	45.7	51	44	76	5.7	-6.5	58	176	247	113	48	26	236	450	172	265	47	0	38	7	202	973	354	0	160	387	97
23	PP_AZ_Cherry_4	AZ Cherry	1	Arizona	34.3467	-112.039	1610	21.2	1610	133	124	181	119	56.7	50	54	79	17.1	-0.7	99	224	249	149	2	152	394	591	304	36	4	0	2	258	850	1887	1081	20	314	467	186
24	PP_WA_M_Vance_5	WA MV	1	Washington	45.9869	-121.327	671.302	19.3	671.302	421	37	90	202	22.1	55	48	153	7.5	-4.6	54	175	246	107	127	24	239	441	162	219	28	0	28	14	299	1075	408	0	122	404	64
25	PP_WA_3	WA	1	Washington	47.0448	-122.523	106.515	13.8	106.515	419	99	200	292	19.4	66	62	225	10.2	0.8	43	139	195	83	22	53	217	362	132	69	14	0	9	105	397	1064	539	0	54	263	18
26	PP-CA_SN_Middle_3	CA SN Middle	1	Sierra Nevada	38.4748	-120.417	1110.5	17.9	1110.5	596	32	94	304	17.2	56	51	355	11.8	-1	88	205	278	159	25	103	292	512	241	61	14	0	5	134	462	1423	806	0	97	480	101
27	PP_STR_1	CO STR	1	Colorado	38.249	-108.644	1755.54	26.8	1755.54	65	89	150	105	60.3	50	48	73	12.3	-8.6	87	208	250	136	27	36	316	551	237	293	25	0	19	29	496	1535	607	16	243	462	132
28	PP_AZ_FUTS_5	AZ FUTS	1	Arizona	35.0968	-111.41	2105	22	2105	134	148	213	132	35.9	45	48	98	9.1	-8.9	109	227	251	158	47	42	309	510	246	245	39	0	22	29	316	1223	490	0	211	363	114
29	PP_AZ_FUTS_1	AZ FUTS	1	Arizona	35.0898	-111.415	2105	22	2105	134	148	213	132	35.9	45	48	98	9.1	-8.9	109	227	251	158	47	42	309	510	246	245	39	0	22	29	316	1223	490	0	211	363	114
30	PP_CA_SN_Middle_2	CA SN Middle	1	Sierra Nevada	38.5537	-120.46	1110.5	18	1110.5	591	30	97	305	16.8	56	51	359	11.3	-1.5	79	200	276	148	31	101	285	505	234	69	16	0	6	115	425	1378	762	0	92	474	91
31	PP_NM_Sandia_4	NM Sandia	1	New Mexico	35.102	-106.226	2230	22.8	2230	67	183	252	97	45.7	46	49	81	10.9	-7.8	119	227	256	163	20	42	332	527	247	223	26	0	20	41	442	1368	557	20	252	344	149
32	PP_CA_SN_North_3	CA SN North	1	Sierra Nevada	39.918	-120.852	1286.53	19.2	1286.53	522	37	97	269	18	50	42	266	7.9	-4	76	197	269	141	78	84	287	527	227	136	26	0	13	45	350	1235	570	0	124	490	92
33	PP_WA_M.Vance_2	WA MV	1	Washington	45.886	-121.085	671.302	20.2	671.302	202	33	69	111	45.2	57	49	84	9.5	-3	56	180	252	114	42	36	250	459	166	168	19	0	19	33	394	1238	519	0	166	426	100
34	PP_UT_1	UT	1	Utah	37.505	-112.614	2481.07	21.4	2481.07	153	104	181	144	28.2	53	53	126	6.8	-11	108	225	262	160	107	0	179	418	185	455	117	0	65	2	133	898	276	0	119	315	65
35	PP_CA_SN_North_1	CA SN North	1	Sierra Nevada	39.9087	-120.932	1286.53	18.7	1286.53	554	40	107	302	17.1	53	45	265	8.7	-3.5	77	196	268	138	69	86	278	509	220	120	25	0	12	54	342	1238	585	0	113	468	84
36	PP_OR_DES_1	OR Des	1	Oregon	43.9529	-121.248	1273.49	18.6	1273.49	163	54	95	96	44.5	51	44	80	6.1	-5.5	63	177	255	118	45	28	243	458	176	204	41	0	28	15	217	1013	393	0	163	403	109
37	PP_STR_2	CO STR	1	Colorado	38.2461	-108.646	1755.54	26.7	1755.54	69	96	159	110	55.7	52	51	79	12.6	-8.2	96	213	256	144	31	0	300	528	225	308	28	0	21	26	469	1502	598	0	222	432	115
38	PP_CO_UP_1	CO UP	1	Colorado	38.745	-108.553	2180.04	25.9	2180.04	59	116	174	82	54	56	56	70	11.4	-9.3	100	218	262	153	35	0	252	462	192	390	55	0	38	15	305	1294	457	0	182	345	111
39	PP_CO_WRFO83_3	CO WRFO83	1	Colorado	39.582	-108.172	2492.78	24.4	2492.78	99	83	161	135	36.3	61	60	119	10.5	-9.5	104	215	262	153	72	0	172	405	139	484	107	0	68	6	201	1119	354	0	95	322	50
40	PP_CA_HR_1	CA HR	1	California	35.6957	-121.098	887.144	13.1	887.144	496	2	45	189	27.7	60	53	196	12.1	3.8	98	211	259	150	3	130	319	511	271	19	5	0	1	370	677	1421	1012	0	175	509	135
41	PP_P3_CP_1	P3 CP	1	Colorado	39.2882	-108.511	2113.89	26.7	2113.89	83	69	134	118	49	58	57	108	12.8	-8.5	106	217	262	157	47	0	258	469	194	371	42	0	30	17	368	1403	516	0	150	399	83
42	PP_CO_KK_2	CO KK	1	Colorado	38.963	-108.227	1856.24	24.8	1856.24	128	113	198	143	32.7	54	56	140	10.6	-9.6	68	192	242	113	79	0	251	448	188	400	64	0	39	13	270	1214	424	0	115	335	61
43	PP_P1S_CP_1	P1S CP	1	Colorado	39.2955	-108.522	2045.49	26.7	2045.49	86	73	139	118	46.8	59	59	111	13	-8.5	82	203	253	128	52	0	247	449	185	394	50	0	34	15	344	1373	498	0	136	376	77
44	PP_AZ_SNBL_2	AZ SNBL	1	Arizona	35.199	-111.43	2740	22.8	2740	105	139	195	111	45.1	45	47	78	10.2	-8.1	98	223	249	150	29	44	329	536	257	210	28	0	17	39	398	1352	570	12	250	398	145
45	PP_UT_5	UT	1	Utah	37.505	-112.614	2481.07	21.4	2481.07	153	104	181	144	28.2	53	53	126	6.8	-11	108	225	262	160	107	0	179	418	185	455	117	0	65	2	133	898	276	0	119	315	65
46	PP_P5S_CP_2	P5S CP	1	Colorado	39.289	-108.49	1962.13	26.7	1962.13	83	69	134	118	49	58	57	108	12.8	-8.5	106	217	262	157	47	0	258	469	194	371	42	0	30	17	368	1403	516	0	150	399	83
47	PP_OR_OCH_1	OR OCH	1	Oregon	44.3611	-120.463	1279.69	19.5	1279.69	124	63	112	105	45.7	51	44	76	5.7	-6.5	58	176	247	113	48	26	236	450	172	265	47	0	38	7	202	973	354	0	160	387	97
48	PP_WA_M_Vance_3	WA MV	1	Washington	45.941	-121.164	671.302	19.3	671.302	399	42	95	199	23.4	58	49	146	8.2	-3.7	64	183	256	120	106	23	235	438	158	200	27	0	25	20	310	1112	449	0	120	395	62
49	PP_AZ_SNBL_4	AZ SNBL	1	Arizona	35.201	-111.43	2740	22.8	2740	105	139	195	111	45.1	45	47	78	10.2	-8.1	98	223	249	150	29	44	329	536	257	210	28	0	17	39	398	1352	570	12	250	398	145
50	PP_NM_Sandia_3	NM Sandia	1	New Mexico	35.0994	-106.227	2230	22.8	2230	67	183	252	97	45.7	46	49	81	10.9	-7.8	119	227	256	163	20	42	332	527	247	223	26	0	20	41	442	1368	557	20	252	344	149
51	PP_OR_OCH_3	OR OCH	1	Oregon	44.3627	-120.452	1279.69	19.5	1279.69	124	63	112	105	45.7	51	44	76	5.7	-6.5	58	176	247	113	48	26	236	450	172	265	47	0	38	7	202	973	354	0	160	387	97
52	PP_P3_CP_2	P3 CP	1	Colorado	39.2884	-108.511	2113.89	26.7	2113.89	83	69	134	118	49	58	57	108	12.8	-8.5	106	217	262	157	47	0	258	469	194	371	42	0	30	17	368	1403	516	0	150	399	83
53	PP_NM_SFE_1	NM SFE	1	New Mexico	35.4028	-105.54	2300	22	2300	57	209	307	123	41.2	45	50	83	10.6	-8.1	107	217	248	151	16	43	331	516	245	211	27	0	20	42	431	1329	552	27	248	308	122
54	PP_STR_3	CO STR	1	Colorado	38.2435	-108.653	1755.54	26.7	1755.54	69	96	159	110	55.7	52	51	79	12.6	-8.2	96	213	256	144	31	0	300	528	225	308	28	0	21	26	469	1502	598	0	222	432	115
55	PP_NM_Sandia_1	NM Sandia	1	New Mexico	35.1024	-106.226	2230	22.8	2230	67	183	252	97	45.7	46	49	81	10.9	-7.8	119	227	256	163	20	42	332	527	247	223	26	0	20	41	442	1368	557	20	252	344	149
56	PP_NM_SFE_4	NM SFE	1	New Mexico	35.4007	-105.547	2300	22	2300	57	209	307	123	41.2	45	50	83	10.6	-8.1	107	217	248	151	16	43	331	516	245	211	27	0	20	42	431	1329	552	27	248	308	122
57	PP_OR_OCH_4	OR OCH	1	Oregon	44.367	-120.452	1279.69	19.5	1279.69	124	63	112	105	45.7	51	44	76	5.7	-6.5	58	176	247	113	48	26	236	450	172	265	47	0	38	7	202	973	354	0	160	387	97
58	PP_P5S_CP_1	P5S CP	1	Colorado	38.2899	-108.489	1962.13	26.2	1962.13	66	99	163	111	53.7	50	49	80	11.5	-9.2	97	213	255	144	32	0	297	526	226	330	34	0	23	22	423	1433	554	0	217	426	114
59	PP_AZ_Cherry_1	AZ Cherry	1	Arizona	34.3472	-112.041	1610	21.2	1610	133	124	181	119	56.7	50	54	79	17.1	-0.7	99	224	249	149	2	152	394	591	304	36	4	0	2	258	850	1887	1081	20	314	467	186
60	PP_AZ_FUTS_3	AZ FUTS	1	Arizona	35.0938	-111.412	2105	22	2105	134	148	213	132	35.9	45	48	98	9.1	-8.9	109	227	251	158	47	42	309	510	246	245	39	0	22	29	316	1223	490	0	211	363	114
61	PP_P3_CP_3	P3 CP	1	Colorado	39.2886	-108.512	2113.89	26.7	2113.89	83	69	134	118	49	58	57	108	12.8	-8.5	106	217	262	157	47	0	258	469	194	371	42	0	30	17	368	1403	516	0	150	399	83
62	PP_P1S_CP_2	P1S CP	1	Colorado	39.294	-108.522	2045.49	26.7	2045.49	86	73	139	118	46.8	59	59	111	13	-8.5	82	203	253	128	52	0	247	449	185	394	50	0	34	15	344	1373	498	0	136	376	77
63	PP_UT_4	UT	1	Utah	37.506	-112.615	2481.07	21.4	2481.07	153	104	181	144	28.2	53	53	126	6.8	-11	108	225	262	160	107	0	179	418	185	455	117	0	65	2	133	898	276	0	119	315	65
64	PP_AZ_Cherry_5	AZ Cherry	1	Arizona	34.3464	-112.039	1610	21.2	1610	133	124	181	119	56.7	50	54	79	17.1	-0.7	99	224	249	149	2	152	394	591	304	36	4	0	2	258	850	1887	1081	20	314	467	186
65	PP_CA_SN_South_4	CA SN South	1	California	37.2003	-119.393	942.88	17.6	942.88	427	16	54	159	27.9	60	56	233	14.3	0.8	88	220	277	162	10	113	292	504	242	40	11	0	3	207	541	1556	883	0	131	488	148
66	PP_NE_NF_1	NE NF	1	Nebraska	42.418	-103.02	1196.34	27.5	1196.34	29	178	293	66	43.2	53	54	150	12.6	-10.5	80	180	236	121	18	0	256	483	189	413	55	0	36	14	362	1453	487	0	106	305	123
67	PP_NM_Sandia_2	NM Sandia	1	New Mexico	35.1008	-106.226	2230	22.8	2230	67	183	252	97	45.7	46	49	81	10.9	-7.8	119	227	256	163	20	42	332	527	247	223	26	0	20	41	442	1368	557	20	252	344	149
68	PP_UT_2	UT	1	Utah	37.5046	-112.614	2481.07	21.4	2481.07	153	104	181	144	28.2	53	53	126	6.8	-11	108	225	262	160	107	0	179	418	185	455	117	0	65	2	133	898	276	0	119	315	65
69	PP_CO_WRFO83_2	CO WRFO83	1	Colorado	39.5822	-108.172	2492.78	24.4	2492.78	99	83	161	135	36.3	61	60	119	10.5	-9.5	104	215	262	153	72	0	172	405	139	484	107	0	68	6	201	1119	354	0	95	322	50
70	PP_AZ_Cherry_3	AZ Cherry	1	Arizona	34.3467	-112.04	1610	21.2	1610	133	124	181	119	56.7	50	54	79	17.1	-0.7	99	224	249	149	2	152	394	591	304	36	4	0	2	258	850	1887	1081	20	314	467	186
71	PP_CO_KK_3	CO KK	1	Colorado	38.963	-108.222	1856.24	24.8	1856.24	128	113	198	143	32.7	54	56	140	10.6	-9.6	68	192	242	113	79	0	251	448	188	400	64	0	39	13	270	1214	424	0	115	335	61
72	PP_CA_HR_3	CA HR	1	California	35.691	-121.091	887.144	13.1	887.144	496	2	45	189	27.7	60	53	196	12.1	3.8	98	211	259	150	3	130	319	511	271	19	5	0	1	370	677	1421	1012	0	175	509	135
73	PP_SD_BHEF_1	SD BHEF	1	South Dakota	44.105	-103.373	1664.21	25.4	1664.21	36	212	329	74	35.2	53	54	171	11	-10.7	74	182	234	117	23	0	236	449	171	417	73	0	39	10	293	1289	421	0	65	238	97
74	PP_SD_BHEF_3	SD BHEF	1	South Dakota	44.1045	-103.374	1664.21	25.4	1664.21	36	212	329	74	35.2	53	54	171	11	-10.7	74	182	234	117	23	0	236	449	171	417	73	0	39	10	293	1289	421	0	65	238	97
75	PP_WA_1	WA	1	Washington	47.0431	-122.529	106.515	13.8	106.515	419	99	200	292	19.4	66	62	225	10.2	0.8	43	139	195	83	22	53	217	362	132	69	14	0	9	105	397	1064	539	0	54	263	18
76	PP-NE_NF_3	NE NF	1	Nebraska	42.413	-103.18	1196.34	27.2	1196.34	30	174	288	67	43.3	54	54	149	12.4	-10.3	78	180	237	118	18	0	252	478	187	405	57	0	37	15	349	1431	480	0	102	304	120
77	PP_AZ_SNBL_3	AZ SNBL	1	Arizona	35.12	-111.431	2740	22.4	2740	120	145	206	122	40	45	48	87	9.7	-8.5	110	228	253	159	37	43	318	522	251	225	33	0	19	34	354	1287	531	6	232	377	128
78	PP_OR_OCH_5	OR OCH	1	Oregon	44.376	-120.458	1279.69	19.5	1279.69	124	63	112	105	45.7	51	44	76	5.7	-6.5	58	176	247	113	48	26	236	450	172	265	47	0	38	7	202	973	354	0	160	387	97
79	PP_ID_CRD_1	ID	1	Idaho	45.559	-115.552	1200	21	1200	302	173	316	207	12.2	48	43	246	1.2	-14	85	187	261	137	274	0	86	383	116	705	246	1	171	0	37	560	118	0	0	210	21
80	PP_NM_SFE_2	NM SFE	1	New Mexico	35.4036	-105.539	2300	22	2300	57	209	307	123	41.2	45	50	83	10.6	-8.1	107	217	248	151	16	43	331	516	245	211	27	0	20	42	431	1329	552	27	248	308	122
81	PP_ID_CRD_4	ID	1	Idaho	45.5588	-115.553	1200	21	1200	302	173	316	207	12.2	48	43	246	1.2	-14	85	187	261	137	274	0	86	383	116	705	246	1	171	0	37	560	118	0	0	210	21
82	PP-OR-DES-3	OR Des	1	Oregon	43.946	-121.225	1273.49	18.5	1273.49	149	54	94	88	48	51	44	73	6	-5.5	62	176	255	117	41	28	244	459	177	202	41	0	29	15	216	1007	390	0	170	406	112
83	PP_OR_DES_2	OR Des	1	Oregon	43.948	-121.24	1273.49	18.6	1273.49	163	54	95	96	44.5	51	44	80	6.1	-5.5	63	177	255	118	45	28	243	458	176	204	41	0	28	15	217	1013	393	0	163	403	109
84	PP-CA_SN_South_3	CA SN South	1	Sierra Nevada	37.268	-119.503	942.88	17.9	942.88	491	18	58	187	24.6	56	52	249	13.2	-0.1	85	216	277	158	12	120	310	532	257	42	11	0	3	200	542	1546	873	0	138	515	148
85	PP_CA_SN_North_2	CA SN North	1	Sierra Nevada	39.9087	-120.898	1286.53	18.7	1286.53	554	40	107	302	17.1	53	45	265	8.7	-3.5	77	196	268	138	69	86	278	509	220	120	25	0	12	54	342	1238	585	0	113	468	84
86	PP_AZ_SNBL_1	AZ SNBL	1	Arizona	35.12	-111.429	2740	22.4	2740	120	145	206	122	40	45	48	87	9.7	-8.5	110	228	253	159	37	43	318	522	251	225	33	0	19	34	354	1287	531	6	232	377	128
87	PP-CA_SN_Middle_1	CA SN Middle	1	Sierra Nevada	38.6	-120.475	1110.5	18.3	1110.5	531	28	104	288	17.5	54	49	353	10.4	-2.4	69	196	272	143	39	98	284	511	237	85	20	0	8	89	385	1335	717	0	86	482	89
88	PP_CO_KK_1	CO KK	1	Colorado	38.9615	-108.228	1856.24	24.8	1856.24	128	113	198	143	32.7	54	56	140	10.6	-9.6	68	192	242	113	79	0	251	448	188	400	64	0	39	13	270	1214	424	0	115	335	61
89	PP_CO_UP_2	CO KK	1	Colorado	38.7425	-108.551	2180.04	25.9	2180.04	59	116	174	82	54	56	56	70	11.4	-9.3	100	218	262	153	35	0	252	462	192	390	55	0	38	15	305	1294	457	0	182	345	111
90	PP_ID_CRD_5	ID	1	Idaho	45.5616	-115.55	1200	21	1200	302	173	316	207	12.2	48	43	246	1.2	-14	85	187	261	137	274	0	86	383	116	705	246	1	171	0	37	560	118	0	0	210	21
91	PP_WA_2	WA	1	Washington	47.0572	-122.509	106.515	13.9	106.515	418	101	202	293	19.5	66	62	223	10.3	0.8	43	139	195	83	22	53	218	362	133	69	13	0	9	106	402	1070	542	0	54	262	19
92	PP_P4_CP_2	P4 CP	1	Colorado	39.296	-108.501	1989.6	26.7	1989.6	83	69	134	118	49	58	57	108	12.8	-8.5	106	217	262	157	47	0	258	469	194	371	42	0	30	17	368	1403	516	0	150	399	83
93	PP_SD_BHEF_2	SD BHEF	1	South Dakota	44.1045	-103.373	1664.21	25.4	1664.21	36	212	329	74	35.2	53	54	171	11	-10.7	74	182	234	117	23	0	236	449	171	417	73	0	39	10	293	1289	421	0	65	238	97
94	PP_AZ_SNBL_5	AZ SNBL	1	Arizona	35.201	-114.308	2740	22.4	2740	120	145	206	122	40	45	48	87	9.7	-8.5	98	223	249	150	29	44	329	536	257	210	28	0	17	39	398	1352	570	12	250	398	145
	Shorthand Variable name	Actual Variable name
	TD_12	Continentality
	PPT_wt_1	Winter Precipitation
	PPT_sm_1	Summer Precipitation
	MSP_12	mean annual summer (May to Sept.) precipitation (mm)
	PPT_at_1	Autumn precipitation
	AHM_12	annual heat-moisture index
	RH_sp_12	Relative Humidity Spring
	RH_sm_12	Relative Humidity Summer
	PPT_sp_1	Spring Precipitation
	Tmin_sm_1	Min Temperature Summer
	Tmin_wt_1	Min Temperature Winter
	Rad_wt	Solar Radiation winter
	Rad_sp	Solar Radiation spring
	Rad_sm	Solar Radiaiton summer
	Rad_at	Solar Ratiatino fall
	PAS_wt_1	Precipitaiton as Snow winter
	Eref_wt	Hargreaves reference evaporation winter
	Eref_sp	Hargreaves reference evaporation spring
	Eref_sm	Hargreaves reference evaporation summer
	Eref_at	Hargreaves reference evaporation autumn
	DD_0_wt	Degree days below zero winter
	DD_0_sp	Degree days below zero spring
	DD_0_sm	degree days below zero summer
	DD_0_at	degree days below zero autumn
	DD5_wt	degree days grearer than 5C winter
	DD5_sp	Degree days greater than 5C spring
	DD5_sm	degree days greater than 5C summer
	DD5_at	Degree days greater than 5C autumn
	CMD_wt	Hargreaves climatic moisture deficit winter
	CMD_sp	Hargreaves climatic moisture deficit spring
	CMD_sm	Hargreaves climatic moisture deficit summer
	CMD_at	Hargreaves climatic moisture deficit autumn

## Sheet: Table S2
Supporting Information Table S2. Coordinates and Climate Data used for gradient forest and GEA analyses. Climate data is from the 1961-1990 averages. ID represents the unique sample ID, Site represents the collection location. Dataset shows which dataset these samples belong to. Region shows State level location, Lat shows latitude, long shows longitude, Elevation shows Elevation in Meters. Full …
ID	Seed_Source	Dataset	Region_Name	Lat	Long	Elevation	AHM	PPT_wt	PPT_sm	MSP	TD	PPT_at	RH_sp	RH_sm	PPT_sp	Tmin_sm	Tmin_wt	Rad_wt_pipo_extent	Rad_sp_Pipo_extent	Rad_sm_pipo_extent	Rad_at_pipo_extnet	PAS_wt	Eref_wt_pipio_extnt	Eref_sp_pipo	Eref_sm_pipo_extnet	Eref_at_pipo_extent	DD_0_wt_pio_extent	DD_0_sp_pipo	DD_0_sm_pipo_extent	DD_0_at_pipo	DD5_wt_pipo	DD5_sp_pipo_extent	DD5_sm_pipo	DD5_at_pipo_	CMD_wt_pipo	CMD_sp_pipo	CMD_sm_pipo	CMD_at_pipo
Doran_Creek_1	Doran_Creek	2	ID+WA	45.55	-114	1828.8	29.7	178	99	178	24.6	107	55	50	126	7.6	-9.9	66	175	242	114	141	0	171	426	123	544	90	0	94	0	176	1037	282	0	82	327	70
Hangman_s_Creek_32	Hangman’s_Creek	2	MT+WY	45.48	-109.41	1371.6	40.1	48	128	258	25.1	99	55	53	164	10.6	-9	64	169	227	105	27	0	231	447	160	369	60	0	36	9	299	1272	433	0	67	318	61
CA_301_8	CA_301	2	CA	41.7038	-123.569	1371.6	6.4	1444	110	305	17	857	60	54	772	10.7	-0.9	48	163	220	92	102	74	243	449	183	84	25	0	11	82	304	1248	639	0	0	340	27
Haden_Creek_18	Haden_Creek	2	ID+WA	48.27	-119.07	1127.76	37.3	123	83	154	23.2	95	58	52	115	7.6	-9	50	170	237	101	91	0	199	395	111	496	67	0	79	0	204	995	304	0	85	312	63
UER_20	UER	2	AZ+NM	33.555	-109.193	1737.36	40.7	119	203	280	20.3	150	39	45	56	10.8	-6.6	105	228	243	151	11	146	391	574	292	103	14	0	8	93	540	1450	699	37	335	372	142
SFK_Taylor_CR_23	SFK_Taylor_CR	2	MT+WY	45.15	-106.02	1127.76	45.4	43	130	221	28.7	79	53	51	129	11.5	-11.9	68	179	236	110	34	0	240	479	168	535	67	0	56	6	324	1400	429	0	111	349	88
CA_321_17	CA_321	2	CA	41.8997	-122.864	1219.2	23.5	398	51	114	18.3	213	62	58	182	11.3	-1.4	100	200	269	161	42	66	235	423	169	108	26	0	12	59	302	1235	613	0	102	372	63
CA_524_21	CA_524	2	CA	39.9595	-121.606	1066.8	13.8	798	37	127	17.3	404	59	52	411	12.5	0.7	72	197	274	141	25	92	285	505	222	50	10	0	4	165	529	1465	839	0	81	468	75
Wheeler_Creek_41	Wheeler_Creek	2	ID+WA	45.5	-114.17	1828.8	22.3	230	118	218	24.2	142	56	52	170	7.6	-9.9	66	175	243	113	184	0	162	407	117	554	105	0	102	0	147	993	263	0	46	289	44
UER_41	UER	2	AZ+NM	33.555	-109.193	1737.36	40.7	119	203	280	20.3	150	39	45	56	10.8	-6.6	105	228	243	151	11	146	391	574	292	103	14	0	8	93	540	1450	699	37	335	372	142
Northport_28	Northport	2	ID+WA	48.56	-117.48	396.24	14.3	373	156	282	22.4	258	60	53	232	6.7	-8.9	36	154	221	82	289	0	149	371	102	529	90	0	92	0	142	878	249	0	15	215	20
Crystal_Springs_16	Crystal_Springs	2	MT+WY	44.5	-107.19	1828.8	12.9	145	150	313	21.7	181	53	58	269	3	-14.9	70	190	243	116	139	0	75	308	89	857	354	1	234	0	24	452	65	0	0	157	0
Green_s_Peak_53	Green_s_Peak	2	AZ+NM	34.126	-109.535	2804.16	19.7	185	237	322	19	178	44	49	133	4.6	-12.4	125	238	256	168	121	0	202	425	210	426	111	0	61	6	123	755	251	0	144	188	51
Hangman_s_Creek_41	Hangman’s_Creek	2	MT+WY	45.48	-109.41	1371.6	40.1	48	128	258	25.1	99	55	53	164	10.6	-9	64	169	227	105	27	0	231	447	160	369	60	0	36	9	299	1272	433	0	67	318	61
Cap_Gap_20	Cap_Gap	2	AZ+NM	33.37	-105.28	2179.32	59.9	42	162	263	19.4	118	45	52	55	12.9	-4.8	99	224	250	143	2	149	392	541	282	78	9	0	6	130	690	1510	748	107	337	379	164
CA_321_15	CA_321	2	CA	41.8997	-122.864	1219.2	23.5	398	51	114	18.3	213	62	58	182	11.3	-1.4	100	200	269	161	42	66	235	423	169	108	26	0	12	59	302	1235	613	0	102	372	63
SFK_Taylor_CR_13	SFK_Taylor_CR	2	MT+WY	45.15	-106.02	1127.76	45.4	43	130	221	28.7	79	53	51	129	11.5	-11.9	68	179	236	110	34	0	240	479	168	535	67	0	56	6	324	1400	429	0	111	349	88
CA_524_4	CA_524	2	CA	39.9595	-121.606	1066.8	13.8	798	37	127	17.3	404	59	52	411	12.5	0.7	72	197	274	141	25	92	285	505	222	50	10	0	4	165	529	1465	839	0	81	468	75
CA_752_35	CA_752	2	CA	41.1007	-120.196	2286	20.5	308	75	162	20.1	159	60	55	197	7.1	-7.1	101	218	287	164	172	0	154	392	152	363	111	0	58	0	99	885	300	0	44	317	56
Haden_Creek_26	Haden_Creek	2	ID+WA	48.27	-119.07	1127.76	37.3	123	83	154	23.2	95	58	52	115	7.6	-9	50	170	237	101	91	0	199	395	111	496	67	0	79	0	204	995	304	0	85	312	63
Northport_5	Northport	2	ID+WA	48.56	-117.48	396.24	14.3	373	156	282	22.4	258	60	53	232	6.7	-8.9	36	154	221	82	289	0	149	371	102	529	90	0	92	0	142	878	249	0	15	215	20
Sheridan_Wyoming_13	Sheridan_Wyoming	2	MT+WY	44.36	-107.06	2133.6	12.5	136	171	342	21.1	168	53	58	281	2.7	-15.1	89	204	257	133	130	0	73	304	93	849	370	2	230	0	20	420	67	0	0	133	0
Northport_29	Northport	2	ID+WA	48.56	-117.48	396.24	14.3	373	156	282	22.4	258	60	53	232	6.7	-8.9	36	154	221	82	289	0	149	371	102	529	90	0	92	0	142	878	249	0	15	215	20
CA_533_2	CA_533	2	CA	37.1263	-119.28	1676.4	22.6	438	25	76	16.5	176	58	55	256	10.6	-2.4	86	221	278	159	29	108	264	462	223	79	26	0	8	96	313	1228	627	0	90	437	121
CA_752_38	CA_752	2	CA	41.1007	-120.196	2286	20.5	308	75	162	20.1	159	60	55	197	7.1	-7.1	101	218	287	164	172	0	154	392	152	363	111	0	58	0	99	885	300	0	44	317	56
CA_533_48	CA_533	2	CA	37.1263	-119.28	1676.4	22.6	438	25	76	16.5	176	58	55	256	10.6	-2.4	86	221	278	159	29	108	264	462	223	79	26	0	8	96	313	1228	627	0	90	437	121
Crystal_Springs_29	Crystal_Springs	2	MT+WY	44.5	-107.19	1828.8	12.9	145	150	313	21.7	181	53	58	269	3	-14.9	70	190	243	116	139	0	75	308	89	857	354	1	234	0	24	452	65	0	0	157	0
Northport_26	Northport	2	ID+WA	48.56	-117.48	396.24	14.3	373	156	282	22.4	258	60	53	232	6.7	-8.9	36	154	221	82	289	0	149	371	102	529	90	0	92	0	142	878	249	0	15	215	20
Haden_Creek_43	Haden_Creek	2	ID+WA	48.27	-119.07	1127.76	37.3	123	83	154	23.2	95	58	52	115	7.6	-9	50	170	237	101	91	0	199	395	111	496	67	0	79	0	204	995	304	0	85	312	63
Crystal_Springs_42	Crystal_Springs	2	MT+WY	44.5	-107.19	1828.8	12.9	145	150	313	21.7	181	53	58	269	3	-14.9	70	190	243	116	139	0	75	308	89	857	354	1	234	0	24	452	65	0	0	157	0
Dominion_14	Dominion	2	ID+WA	48.34	-117.47	1219.2	16.5	340	133	241	22.6	230	56	49	207	6.2	-9.2	58	171	239	111	252	0	200	401	113	499	77	0	86	0	170	928	272	0	39	268	33
UER_11	UER	2	AZ+NM	33.555	-109.193	1737.36	40.7	119	203	280	20.3	150	39	45	56	10.8	-6.6	105	228	243	151	11	146	391	574	292	103	14	0	8	93	540	1450	699	37	335	372	142
Haden_Creek_41	Haden_Creek	2	ID+WA	48.27	-119.07	1127.76	37.3	123	83	154	23.2	95	58	52	115	7.6	-9	50	170	237	101	91	0	199	395	111	496	67	0	79	0	204	995	304	0	85	312	63
Doran_Creek_10	Doran_Creek	2	ID+WA	45.55	-114	1828.8	29.7	178	99	178	24.6	107	55	50	126	7.6	-9.9	66	175	242	114	141	0	171	426	123	544	90	0	94	0	176	1037	282	0	82	327	70
Northport_19	Northport	2	ID+WA	48.56	-117.48	396.24	14.3	373	156	282	22.4	258	60	53	232	6.7	-8.9	36	154	221	82	289	0	149	371	102	529	90	0	92	0	142	878	249	0	15	215	20
CA_301_39	CA_301	2	CA	41.7038	-123.569	1371.6	6.4	1444	110	305	17	857	60	54	772	10.7	-0.9	48	163	220	92	102	74	243	449	183	84	25	0	11	82	304	1248	639	0	0	340	27
CA_321_8	CA_321	2	CA	41.8997	-122.864	1219.2	23.5	398	51	114	18.3	213	62	58	182	11.3	-1.4	100	200	269	161	42	66	235	423	169	108	26	0	12	59	302	1235	613	0	102	372	63
Cherry_Road_3	Cherry_Road_	2	AZ+NM	34.586	-112.057	1591.97	49.8	116	142	206	20.8	118	48	52	78	13.4	-3.5	99	226	251	151	7	133	354	548	279	76	12	0	5	126	575	1568	821	17	276	406	161
CA_321_46	CA_321	2	CA	41.8997	-122.864	1219.2	23.5	398	51	114	18.3	213	62	58	182	11.3	-1.4	100	200	269	161	42	66	235	423	169	108	26	0	12	59	302	1235	613	0	102	372	63
SFK_Taylor_CR_28	SFK_Taylor_CR	2	MT+WY	45.15	-106.02	1127.76	45.4	43	130	221	28.7	79	53	51	129	11.5	-11.9	68	179	236	110	34	0	240	479	168	535	67	0	56	6	324	1400	429	0	111	349	88
Haden_Creek_42	Haden_Creek	2	ID+WA	48.27	-119.07	1127.76	37.3	123	83	154	23.2	95	58	52	115	7.6	-9	50	170	237	101	91	0	199	395	111	496	67	0	79	0	204	995	304	0	85	312	63
Crystal_Springs_4	Crystal_Springs	2	MT+WY	44.5	-107.19	1828.8	12.9	145	150	313	21.7	181	53	58	269	3	-14.9	70	190	243	116	139	0	75	308	89	857	354	1	234	0	24	452	65	0	0	157	0
CA_301_28	CA_301	2	CA	41.7038	-123.569	1371.6	6.4	1444	110	305	17	857	60	54	772	10.7	-0.9	48	163	220	92	102	74	243	449	183	84	25	0	11	82	304	1248	639	0	0	340	27
CA_752_26	CA_752	2	CA	41.1007	-120.196	2286	20.5	308	75	162	20.1	159	60	55	197	7.1	-7.1	101	218	287	164	172	0	154	392	152	363	111	0	58	0	99	885	300	0	44	317	56
Dominion_8	Dominion	2	ID+WA	48.34	-117.47	1219.2	16.5	340	133	241	22.6	230	56	49	207	6.2	-9.2	58	171	239	111	252	0	200	401	113	499	77	0	86	0	170	928	272	0	39	268	33
Dominon_16	Dominion	2	ID+WA	48.34	-117.47	1219.2	16.5	340	133	241	22.6	230	56	49	207	6.2	-9.2	58	171	239	111	252	0	200	401	113	499	77	0	86	0	170	928	272	0	39	268	33
Sheridan_Wyoming_14	Sheridan_Wyoming	2	MT+WY	44.36	-107.06	2133.6	12.5	136	171	342	21.1	168	53	58	281	2.7	-15.1	89	204	257	133	130	0	73	304	93	849	370	2	230	0	20	420	67	0	0	133	0
Cherry_Road_20	Cherry_Road_	2	AZ+NM	34.586	-112.057	1591.97	49.8	116	142	206	20.8	118	48	52	78	13.4	-3.5	99	226	251	151	7	133	354	548	279	76	12	0	5	126	575	1568	821	17	276	406	161
CA_321_32	CA_321	2	CA	41.8997	-122.864	1219.2	23.5	398	51	114	18.3	213	62	58	182	11.3	-1.4	100	200	269	161	42	66	235	423	169	108	26	0	12	59	302	1235	613	0	102	372	63
Northport_17	Northport	2	ID+WA	48.56	-117.48	396.24	14.3	373	156	282	22.4	258	60	53	232	6.7	-8.9	36	154	221	82	289	0	149	371	102	529	90	0	92	0	142	878	249	0	15	215	20
Dominion_20	Dominion	2	ID+WA	48.34	-117.47	1219.2	16.5	340	133	241	22.6	230	56	49	207	6.2	-9.2	58	171	239	111	252	0	200	401	113	499	77	0	86	0	170	928	272	0	39	268	33
Rock_Creek_7	Rock_Creek_	2	MT+WY	46.52	-109.31	1463.04	47.8	35	144	227	25.5	61	52	50	98	8.9	-11.1	65	173	229	107	26	0	185	437	152	500	88	0	60	2	240	1155	348	0	103	293	91
CA_524_26	CA_524	2	CA	39.9595	-121.606	1066.8	13.8	798	37	127	17.3	404	59	52	411	12.5	0.7	72	197	274	141	25	92	285	505	222	50	10	0	4	165	529	1465	839	0	81	468	75
Cap_Gap_28	Cap_Gap	2	AZ+NM	33.37	-105.28	2179.32	59.9	42	162	263	19.4	118	45	52	55	12.9	-4.8	99	224	250	143	2	149	392	541	282	78	9	0	6	130	690	1510	748	107	337	379	164
CA_524_50	CA_524	2	CA	39.9595	-121.606	1066.8	13.8	798	37	127	17.3	404	59	52	411	12.5	0.7	72	197	274	141	25	92	285	505	222	50	10	0	4	165	529	1465	839	0	81	468	75
CA_752_20	CA_752	2	CA	41.1007	-120.196	2286	20.5	308	75	162	20.1	159	60	55	197	7.1	-7.1	101	218	287	164	172	0	154	392	152	363	111	0	58	0	99	885	300	0	44	317	56
Cherry_Road_16	Cherry_Road_	2	AZ+NM	34.586	-112.057	1591.97	49.8	116	142	206	20.8	118	48	52	78	13.4	-3.5	99	226	251	151	7	133	354	548	279	76	12	0	5	126	575	1568	821	17	276	406	161
Cap_Gap_6	Cap_Gap	2	AZ+NM	33.37	-105.28	2179.32	59.9	42	162	263	19.4	118	45	52	55	12.9	-4.8	99	224	250	143	2	149	392	541	282	78	9	0	6	130	690	1510	748	107	337	379	164
Cap_Gap_33	Cap_Gap	2	AZ+NM	33.37	-105.28	2179.32	59.9	42	162	263	19.4	118	45	52	55	12.9	-4.8	99	224	250	143	2	149	392	541	282	78	9	0	6	130	690	1510	748	107	337	379	164
CA_993_42	CA_993	2	CA	34.2605	-117.639	1828.8	21.5	484	26	91	17.1	158	63	64	267	12.5	-1.7	87	223	266	156	38	107	254	419	210	87	29	0	8	90	312	1245	620	0	92	393	106
Wheeler_Creek_42	Wheeler_Creek	2	ID+WA	45.5	-114.17	1828.8	22.3	230	118	218	24.2	142	56	52	170	7.6	-9.9	66	175	243	113	184	0	162	407	117	554	105	0	102	0	147	993	263	0	46	289	44
Cherry_Road_5	Cherry_Road_	2	AZ+NM	34.586	-112.057	1591.97	49.8	116	142	206	20.8	118	48	52	78	13.4	-3.5	99	226	251	151	7	133	354	548	279	76	12	0	5	126	575	1568	821	17	276	406	161
CA_321_35	CA_321	2	CA	41.8997	-122.864	1219.2	23.5	398	51	114	18.3	213	62	58	182	11.3	-1.4	100	200	269	161	42	66	235	423	169	108	26	0	12	59	302	1235	613	0	102	372	63
SFK_Taylor_CR_8	SFK_Taylor_CR	2	MT+WY	45.15	-106.02	1127.76	45.4	43	130	221	28.7	79	53	51	129	11.5	-11.9	68	179	236	110	34	0	240	479	168	535	67	0	56	6	324	1400	429	0	111	349	88
CA_993_14	CA_993	2	CA	34.2605	-117.639	1828.8	21.5	484	26	91	17.1	158	63	64	267	12.5	-1.7	87	223	266	156	38	107	254	419	210	87	29	0	8	90	312	1245	620	0	92	393	106
Sheridan_Wyoming_2	Sheridan_Wyoming	2	MT+WY	44.36	-107.06	2133.6	12.5	136	171	342	21.1	168	53	58	281	2.7	-15.1	89	204	257	133	130	0	73	304	93	849	370	2	230	0	20	420	67	0	0	133	0
Doran_Creek_42	Doran_Creek	2	ID+WA	45.55	-114	1828.8	29.7	178	99	178	24.6	107	55	50	126	7.6	-9.9	66	175	242	114	141	0	171	426	123	544	90	0	94	0	176	1037	282	0	82	327	70
San_Fran_Peaks_6	San_Fran_Peaks	2	AZ+NM	35.33	-111.71	2743.2	15.3	268	196	295	20.1	189	44	51	225	4.3	-12.4	129	240	266	177	208	0	184	405	156	528	138	0	86	2	86	697	207	0	73	209	41
Hangman_s_Creek_11	Hangman’s_Creek	2	MT+WY	45.48	-109.41	1371.6	40.1	48	128	258	25.1	99	55	53	164	10.6	-9	64	169	227	105	27	0	231	447	160	369	60	0	36	9	299	1272	433	0	67	318	61
Cherry_Road_24	Cherry_Road_	2	AZ+NM	34.586	-112.057	1591.97	49.8	116	142	206	20.8	118	48	52	78	13.4	-3.5	99	226	251	151	7	133	354	548	279	76	12	0	5	126	575	1568	821	17	276	406	161
Doran_Creek_54	Doran_Creek	2	ID+WA	45.55	-114	1828.8	29.7	178	99	178	24.6	107	55	50	126	7.6	-9.9	66	175	242	114	141	0	171	426	123	544	90	0	94	0	176	1037	282	0	82	327	70
Woodruff_Park_10	Woodruff_Park	2	MT+WY	46.23	-105.36	944.88	48.1	33	138	234	31.7	72	53	52	112	12.4	-13.5	59	167	225	98	29	0	199	477	162	668	78	0	62	3	361	1463	440	0	103	338	89
Green_s_Peak_47	Green_s_Peak	2	AZ+NM	34.126	-109.535	2804.16	19.7	185	237	322	19	178	44	49	133	4.6	-12.4	125	238	256	168	121	0	202	425	210	426	111	0	61	6	123	755	251	0	144	188	51
Haden_Creek_33	Haden_Creek	2	ID+WA	48.27	-119.07	1127.76	37.3	123	83	154	23.2	95	58	52	115	7.6	-9	50	170	237	101	91	0	199	395	111	496	67	0	79	0	204	995	304	0	85	312	63
Sheridan_Wyoming_18	Sheridan_Wyoming	2	MT+WY	44.36	-107.06	2133.6	12.5	136	171	342	21.1	168	53	58	281	2.7	-15.1	89	204	257	133	130	0	73	304	93	849	370	2	230	0	20	420	67	0	0	133	0
San_Fran_Peaks_36	San_Fran_Peaks	2	AZ+NM	35.33	-111.71	2743.2	15.3	268	196	295	20.1	189	44	51	225	4.3	-12.4	129	240	266	177	208	0	184	405	156	528	138	0	86	2	86	697	207	0	73	209	41
Woodruff_Park_22	Woodruff_Park	2	MT+WY	46.23	-105.36	944.88	48.1	33	138	234	31.7	72	53	52	112	12.4	-13.5	59	167	225	98	29	0	199	477	162	668	78	0	62	3	361	1463	440	0	103	338	89
Woodruff_Park_33	Woodruff_Park	2	MT+WY	46.23	-105.36	944.88	48.1	33	138	234	31.7	72	53	52	112	12.4	-13.5	59	167	225	98	29	0	199	477	162	668	78	0	62	3	361	1463	440	0	103	338	89
Green_s_Peak_46	Green_s_Peak	2	AZ+NM	34.126	-109.535	2804.16	19.7	185	237	322	19	178	44	49	133	4.6	-12.4	125	238	256	168	121	0	202	425	210	426	111	0	61	6	123	755	251	0	144	188	51
Woodruff_Park_2	Woodruff_Park	2	MT+WY	46.23	-105.36	944.88	48.1	33	138	234	31.7	72	53	52	112	12.4	-13.5	59	167	225	98	29	0	199	477	162	668	78	0	62	3	361	1463	440	0	103	338	89
SFK_T_CR_45	SFK_Taylor_CR	2	MT+WY	45.15	-106.02	1127.76	45.4	43	130	221	28.7	79	53	51	129	11.5	-11.9	68	179	236	110	34	0	240	479	168	535	67	0	56	6	324	1400	429	0	111	349	88
Crystal_Springs_33	Crystal_Springs	2	MT+WY	44.5	-107.19	1828.8	12.9	145	150	313	21.7	181	53	58	269	3	-14.9	70	190	243	116	139	0	75	308	89	857	354	1	234	0	24	452	65	0	0	157	0
CA_993_29	CA_993	2	CA	34.2605	-117.639	1828.8	21.5	484	26	91	17.1	158	63	64	267	12.5	-1.7	87	223	266	156	38	107	254	419	210	87	29	0	8	90	312	1245	620	0	92	393	106
CA_752_28	CA_752	2	CA	41.1007	-120.196	2286	20.5	308	75	162	20.1	159	60	55	197	7.1	-7.1	101	218	287	164	172	0	154	392	152	363	111	0	58	0	99	885	300	0	44	317	56
Sheridan_Wyoming_46	Sheridan_Wyoming	2	MT+WY	44.36	-107.06	2133.6	12.5	136	171	342	21.1	168	53	58	281	2.7	-15.1	89	204	257	133	130	0	73	304	93	849	370	2	230	0	20	420	67	0	0	133	0
CA_533_47	CA_533	2	CA	37.1263	-119.28	1676.4	22.6	438	25	76	16.5	176	58	55	256	10.6	-2.4	86	221	278	159	29	108	264	462	223	79	26	0	8	96	313	1228	627	0	90	437	121
CA_321_36	CA_321	2	CA	41.8997	-122.864	1219.2	23.5	398	51	114	18.3	213	62	58	182	11.3	-1.4	100	200	269	161	42	66	235	423	169	108	26	0	12	59	302	1235	613	0	102	372	63
Crystal_Springs_31	Crystal_Springs	2	MT+WY	44.5	-107.19	1828.8	12.9	145	150	313	21.7	181	53	58	269	3	-14.9	70	190	243	116	139	0	75	308	89	857	354	1	234	0	24	452	65	0	0	157	0
SFK_Taylor_CR_20	SFK_Taylor_CR	2	MT+WY	45.15	-106.02	1127.76	45.4	43	130	221	28.7	79	53	51	129	11.5	-11.9	68	179	236	110	34	0	240	479	168	535	67	0	56	6	324	1400	429	0	111	349	88
CA_524_1	CA_524	2	CA	39.9595	-121.606	1066.8	13.8	798	37	127	17.3	404	59	52	411	12.5	0.7	72	197	274	141	25	92	285	505	222	50	10	0	4	165	529	1465	839	0	81	468	75
SFK_Taylor_CR_35	SFK_Taylor_CR	2	MT+WY	45.15	-106.02	1127.76	45.4	43	130	221	28.7	79	53	51	129	11.5	-11.9	68	179	236	110	34	0	240	479	168	535	67	0	56	6	324	1400	429	0	111	349	88
SFK_Taylor_CR_47	SFK_Taylor_CR	2	MT+WY	45.15	-106.02	1127.76	45.4	43	130	221	28.7	79	53	51	129	11.5	-11.9	68	179	236	110	34	0	240	479	168	535	67	0	56	6	324	1400	429	0	111	349	88
CA_993_54	CA_993	2	CA	34.2605	-117.639	1828.8	21.5	484	26	91	17.1	158	63	64	267	12.5	-1.7	87	223	266	156	38	107	254	419	210	87	29	0	8	90	312	1245	620	0	92	393	106
Doran_Creek_12	Doran_Creek	2	ID+WA	45.55	-114	1828.8	29.7	178	99	178	24.6	107	55	50	126	7.6	-9.9	66	175	242	114	141	0	171	426	123	544	90	0	94	0	176	1037	282	0	82	327	70
Dominion_39	Dominion	2	ID+WA	48.34	-117.47	1219.2	16.5	340	133	241	22.6	230	56	49	207	6.2	-9.2	58	171	239	111	252	0	200	401	113	499	77	0	86	0	170	928	272	0	39	268	33
Green_s_Peak_58	Green_s_Peak	2	AZ+NM	34.126	-109.535	2804.16	19.7	185	237	322	19	178	44	49	133	4.6	-12.4	125	238	256	168	121	0	202	425	210	426	111	0	61	6	123	755	251	0	144	188	51
CA_524_53	CA_524	2	CA	39.9595	-121.606	1066.8	13.8	798	37	127	17.3	404	59	52	411	12.5	0.7	72	197	274	141	25	92	285	505	222	50	10	0	4	165	529	1465	839	0	81	468	75
SFK_Taylor_CR_10	SFK_Taylor_CR	2	MT+WY	45.15	-106.02	1127.76	45.4	43	130	221	28.7	79	53	51	129	11.5	-11.9	68	179	236	110	34	0	240	479	168	535	67	0	56	6	324	1400	429	0	111	349	88
Dominion_15	Dominion	2	ID+WA	48.34	-117.47	1219.2	16.5	340	133	241	22.6	230	56	49	207	6.2	-9.2	58	171	239	111	252	0	200	401	113	499	77	0	86	0	170	928	272	0	39	268	33
San_Fran_Peaks_26	San_Fran_Peaks	2	AZ+NM	35.33	-111.71	2743.2	15.3	268	196	295	20.1	189	44	51	225	4.3	-12.4	129	240	266	177	208	0	184	405	156	528	138	0	86	2	86	697	207	0	73	209	41
UER_24	UER	2	AZ+NM	33.555	-109.193	1737.36	40.7	119	203	280	20.3	150	39	45	56	10.8	-6.6	105	228	243	151	11	146	391	574	292	103	14	0	8	93	540	1450	699	37	335	372	142
CA_533_38	CA_533	2	CA	37.1263	-119.28	1676.4	22.6	438	25	76	16.5	176	58	55	256	10.6	-2.4	86	221	278	159	29	108	264	462	223	79	26	0	8	96	313	1228	627	0	90	437	121
Northport_40	Northport	2	ID+WA	48.56	-117.48	396.24	14.3	373	156	282	22.4	258	60	53	232	6.7	-8.9	36	154	221	82	289	0	149	371	102	529	90	0	92	0	142	878	249	0	15	215	20
CA_533_30	CA_533	2	CA	37.1263	-119.28	1676.4	22.6	438	25	76	16.5	176	58	55	256	10.6	-2.4	86	221	278	159	29	108	264	462	223	79	26	0	8	96	313	1228	627	0	90	437	121
CA_533_42	CA_533	2	CA	37.1263	-119.28	1676.4	22.6	438	25	76	16.5	176	58	55	256	10.6	-2.4	86	221	278	159	29	108	264	462	223	79	26	0	8	96	313	1228	627	0	90	437	121
Cherry_Road_33	Cherry_Road_	2	AZ+NM	34.586	-112.057	1591.97	49.8	116	142	206	20.8	118	48	52	78	13.4	-3.5	99	226	251	151	7	133	354	548	279	76	12	0	5	126	575	1568	821	17	276	406	161
Sheridan_Wyoming_36	Sheridan_Wyoming	2	MT+WY	44.36	-107.06	2133.6	12.5	136	171	342	21.1	168	53	58	281	2.7	-15.1	89	204	257	133	130	0	73	304	93	849	370	2	230	0	20	420	67	0	0	133	0
CA_301_40	CA_301	2	CA	41.7038	-123.569	1371.6	6.4	1444	110	305	17	857	60	54	772	10.7	-0.9	48	163	220	92	102	74	243	449	183	84	25	0	11	82	304	1248	639	0	0	340	27
Crystal_Springs_38	Crystal_Springs	2	MT+WY	44.5	-107.19	1828.8	12.9	145	150	313	21.7	181	53	58	269	3	-14.9	70	190	243	116	139	0	75	308	89	857	354	1	234	0	24	452	65	0	0	157	0
SFK_Taylor_CR_24	SFK_Taylor_CR	2	MT+WY	45.15	-106.02	1127.76	45.4	43	130	221	28.7	79	53	51	129	11.5	-11.9	68	179	236	110	34	0	240	479	168	535	67	0	56	6	324	1400	429	0	111	349	88
Wheeler_Creek_46	Wheeler_Creek	2	ID+WA	45.5	-114.17	1828.8	22.3	230	118	218	24.2	142	56	52	170	7.6	-9.9	66	175	243	113	184	0	162	407	117	554	105	0	102	0	147	993	263	0	46	289	44
Dominion_49	Dominion	2	ID+WA	48.34	-117.47	1219.2	16.5	340	133	241	22.6	230	56	49	207	6.2	-9.2	58	171	239	111	252	0	200	401	113	499	77	0	86	0	170	928	272	0	39	268	33
Crystal_Springs_23	Crystal_Springs	2	MT+WY	44.5	-107.19	1828.8	12.9	145	150	313	21.7	181	53	58	269	3	-14.9	70	190	243	116	139	0	75	308	89	857	354	1	234	0	24	452	65	0	0	157	0
San_Fran_Peaks_33	San_Fran_Peaks	2	AZ+NM	35.33	-111.71	2743.2	15.3	268	196	295	20.1	189	44	51	225	4.3	-12.4	129	240	266	177	208	0	184	405	156	528	138	0	86	2	86	697	207	0	73	209	41
Crystal_Springs_37	Crystal_Springs	2	MT+WY	44.5	-107.19	1828.8	12.9	145	150	313	21.7	181	53	58	269	3	-14.9	70	190	243	116	139	0	75	308	89	857	354	1	234	0	24	452	65	0	0	157	0
UER_33	UER	2	AZ+NM	33.555	-109.193	1737.36	40.7	119	203	280	20.3	150	39	45	56	10.8	-6.6	105	228	243	151	11	146	391	574	292	103	14	0	8	93	540	1450	699	37	335	372	142
Green_s_Peak_48	Green_s_Peak	2	AZ+NM	34.126	-109.535	2804.16	19.7	185	237	322	19	178	44	49	133	4.6	-12.4	125	238	256	168	121	0	202	425	210	426	111	0	61	6	123	755	251	0	144	188	51
Mount_Taylor_21	Mount_Taylor	2	AZ+NM	35.06	-108.08	2438.4	47.8	68	138	194	21.7	87	43	47	61	7.6	-10.7	128	237	263	174	35	0	299	490	233	337	56	0	37	19	255	1085	388	0	237	352	146
CA_533_27	CA_533	2	CA	37.1263	-119.28	1676.4	22.6	438	25	76	16.5	176	58	55	256	10.6	-2.4	86	221	278	159	29	108	264	462	223	79	26	0	8	96	313	1228	627	0	90	437	121
CA_301_26	CA_301	2	CA	41.7038	-123.569	1371.6	6.4	1444	110	305	17	857	60	54	772	10.7	-0.9	48	163	220	92	102	74	243	449	183	84	25	0	11	82	304	1248	639	0	0	340	27
San_Fran_Peaks_16	San_Fran_Peaks	2	AZ+NM	35.33	-111.71	2743.2	15.3	268	196	295	20.1	189	44	51	225	4.3	-12.4	129	240	266	177	208	0	184	405	156	528	138	0	86	2	86	697	207	0	73	209	41
Haden_Creek_23	Haden_Creek	2	ID+WA	48.27	-119.07	1127.76	37.3	123	83	154	23.2	95	58	52	115	7.6	-9	50	170	237	101	91	0	199	395	111	496	67	0	79	0	204	995	304	0	85	312	63
Mount_Taylor_10	Mount_Taylor	2	AZ+NM	35.06	-108.08	2438.4	47.8	68	138	194	21.7	87	43	47	61	7.6	-10.7	128	237	263	174	35	0	299	490	233	337	56	0	37	19	255	1085	388	0	237	352	146
Rock_Creek_27	Rock_Creek_	2	MT+WY	46.52	-109.31	1463.04	47.8	35	144	227	25.5	61	52	50	98	8.9	-11.1	65	173	229	107	26	0	185	437	152	500	88	0	60	2	240	1155	348	0	103	293	91
CA_533_50	CA_533	2	CA	37.1263	-119.28	1676.4	22.6	438	25	76	16.5	176	58	55	256	10.6	-2.4	86	221	278	159	29	108	264	462	223	79	26	0	8	96	313	1228	627	0	90	437	121
CA_533_40	CA_533	2	CA	37.1263	-119.28	1676.4	22.6	438	25	76	16.5	176	58	55	256	10.6	-2.4	86	221	278	159	29	108	264	462	223	79	26	0	8	96	313	1228	627	0	90	437	121
Woodruff_Park_34	Woodruff_Park	2	MT+WY	46.23	-105.36	944.88	48.1	33	138	234	31.7	72	53	52	112	12.4	-13.5	59	167	225	98	29	0	199	477	162	668	78	0	62	3	361	1463	440	0	103	338	89
Cap_Gap_37	Cap_Gap	2	AZ+NM	33.37	-105.28	2179.32	59.9	42	162	263	19.4	118	45	52	55	12.9	-4.8	99	224	250	143	2	149	392	541	282	78	9	0	6	130	690	1510	748	107	337	379	164
Mount_Taylor_40	Mount_Taylor	2	AZ+NM	35.06	-108.08	2438.4	47.8	68	138	194	21.7	87	43	47	61	7.6	-10.7	128	237	263	174	35	0	299	490	233	337	56	0	37	19	255	1085	388	0	237	352	146
Green_s_Peak_43	Green_s_Peak	2	AZ+NM	34.126	-109.535	2804.16	19.7	185	237	322	19	178	44	49	133	4.6	-12.4	125	238	256	168	121	0	202	425	210	426	111	0	61	6	123	755	251	0	144	188	51
Crystal_Springs_24	Crystal_Springs	2	MT+WY	44.5	-107.19	1828.8	12.9	145	150	313	21.7	181	53	58	269	3	-14.9	70	190	243	116	139	0	75	308	89	857	354	1	234	0	24	452	65	0	0	157	0
Sheridan_Wyoming_48	Sheridan_Wyoming	2	MT+WY	44.36	-107.06	2133.6	12.5	136	171	342	21.1	168	53	58	281	2.7	-15.1	89	204	257	133	130	0	73	304	93	849	370	2	230	0	20	420	67	0	0	133	0
Rock_Creek_11	Rock_Creek_	2	MT+WY	46.52	-109.31	1463.04	47.8	35	144	227	25.5	61	52	50	98	8.9	-11.1	65	173	229	107	26	0	185	437	152	500	88	0	60	2	240	1155	348	0	103	293	91
SFK_T_CR_21	SFK_Taylor_CR	2	MT+WY	45.15	-106.02	1127.76	45.4	43	130	221	28.7	79	53	51	129	11.5	-11.9	68	179	236	110	34	0	240	479	168	535	67	0	56	6	324	1400	429	0	111	349	88
Crystal_Springs_2	Crystal_Springs	2	MT+WY	44.5	-107.19	1828.8	12.9	145	150	313	21.7	181	53	58	269	3	-14.9	70	190	243	116	139	0	75	308	89	857	354	1	234	0	24	452	65	0	0	157	0
Crystal_Springs_50	Crystal_Springs	2	MT+WY	44.5	-107.19	1828.8	12.9	145	150	313	21.7	181	53	58	269	3	-14.9	70	190	243	116	139	0	75	308	89	857	354	1	234	0	24	452	65	0	0	157	0
SFK_Taylor_CR_31	SFK_Taylor_CR	2	MT+WY	45.15	-106.02	1127.76	45.4	43	130	221	28.7	79	53	51	129	11.5	-11.9	68	179	236	110	34	0	240	479	168	535	67	0	56	6	324	1400	429	0	111	349	88
Wheeler_Creek_12	Wheeler_Creek	2	ID+WA	45.5	-114.17	1828.8	22.3	230	118	218	24.2	142	56	52	170	7.6	-9.9	66	175	243	113	184	0	162	407	117	554	105	0	102	0	147	993	263	0	46	289	44
Wheeler_Creek_55	Wheeler_Creek	2	ID+WA	45.5	-114.17	1828.8	22.3	230	118	218	24.2	142	56	52	170	7.6	-9.9	66	175	243	113	184	0	162	407	117	554	105	0	102	0	147	993	263	0	46	289	44
CA_752_5	CA_752	2	CA	41.1007	-120.196	2286	20.5	308	75	162	20.1	159	60	55	197	7.1	-7.1	101	218	287	164	172	0	154	392	152	363	111	0	58	0	99	885	300	0	44	317	56
Rock_Creek_14	Rock_Creek_	2	MT+WY	46.52	-109.31	1463.04	47.8	35	144	227	25.5	61	52	50	98	8.9	-11.1	65	173	229	107	26	0	185	437	152	500	88	0	60	2	240	1155	348	0	103	293	91
Rock_Creek_3	Rock_Creek_	2	MT+WY	46.52	-109.31	1463.04	47.8	35	144	227	25.5	61	52	50	98	8.9	-11.1	65	173	229	107	26	0	185	437	152	500	88	0	60	2	240	1155	348	0	103	293	91
Tonata_Creek_44	Tonata_Creek	2	ID+WA	48.54	-118.44	609.6	20.7	227	127	219	22.7	162	62	58	182	7.7	-9.3	52	165	233	95	183	0	146	353	98	560	99	0	110	0	141	893	263	0	37	227	30
Cherry_Road_31	Cherry_Road_	2	AZ+NM	34.586	-112.057	1591.97	49.8	116	142	206	20.8	118	48	52	78	13.4	-3.5	99	226	251	151	7	133	354	548	279	76	12	0	5	126	575	1568	821	17	276	406	161
Dominon_23	Dominion	2	ID+WA	48.34	-117.47	1219.2	16.5	340	133	241	22.6	230	56	49	207	6.2	-9.2	58	171	239	111	252	0	200	401	113	499	77	0	86	0	170	928	272	0	39	268	33
CA_993_26	CA_993	2	CA	34.2605	-117.639	1828.8	21.5	484	26	91	17.1	158	63	64	267	12.5	-1.7	87	223	266	156	38	107	254	419	210	87	29	0	8	90	312	1245	620	0	92	393	106
CA_533_51	CA_533	2	CA	37.1263	-119.28	1676.4	22.6	438	25	76	16.5	176	58	55	256	10.6	-2.4	86	221	278	159	29	108	264	462	223	79	26	0	8	96	313	1228	627	0	90	437	121
SFK_T_CR_37	SFK_Taylor_CR	2	MT+WY	45.15	-106.02	1127.76	45.4	43	130	221	28.7	79	53	51	129	11.5	-11.9	68	179	236	110	34	0	240	479	168	535	67	0	56	6	324	1400	429	0	111	349	88
Woodruff_park_14	Woodruff_Park	2	MT+WY	46.23	-105.36	944.88	48.1	33	138	234	31.7	72	53	52	112	12.4	-13.5	59	167	225	98	29	0	199	477	162	668	78	0	62	3	361	1463	440	0	103	338	89
Green_s_Peak_54	Green_s_Peak	2	AZ+NM	34.126	-109.535	2804.16	19.7	185	237	322	19	178	44	49	133	4.6	-12.4	125	238	256	168	121	0	202	425	210	426	111	0	61	6	123	755	251	0	144	188	51
CA_533_14	CA_533	2	CA	37.1263	-119.28	1676.4	22.6	438	25	76	16.5	176	58	55	256	10.6	-2.4	86	221	278	159	29	108	264	462	223	79	26	0	8	96	313	1228	627	0	90	437	121
Wheeler_Creek_3	Wheeler_Creek	2	ID+WA	45.5	-114.17	1828.8	22.3	230	118	218	24.2	142	56	52	170	7.6	-9.9	66	175	243	113	184	0	162	407	117	554	105	0	102	0	147	993	263	0	46	289	44
Haden_creek_21	Haden_Creek	2	ID+WA	48.27	-119.07	1127.76	37.3	123	83	154	23.2	95	58	52	115	7.6	-9	50	170	237	101	91	0	199	395	111	496	67	0	79	0	204	995	304	0	85	312	63
Woodruff_Park_21	Woodruff_Park	2	MT+WY	46.23	-105.36	944.88	48.1	33	138	234	31.7	72	53	52	112	12.4	-13.5	59	167	225	98	29	0	199	477	162	668	78	0	62	3	361	1463	440	0	103	338	89
SFK_T_CR_14	SFK_Taylor_CR	2	MT+WY	45.15	-106.02	1127.76	45.4	43	130	221	28.7	79	53	51	129	11.5	-11.9	68	179	236	110	34	0	240	479	168	535	67	0	56	6	324	1400	429	0	111	349	88
UER_17	UER	2	AZ+NM	33.555	-109.193	1737.36	40.7	119	203	280	20.3	150	39	45	56	10.8	-6.6	105	228	243	151	11	146	391	574	292	103	14	0	8	93	540	1450	699	37	335	372	142
Crystal_Springs_27	Crystal_Springs	2	MT+WY	44.5	-107.19	1828.8	12.9	145	150	313	21.7	181	53	58	269	3	-14.9	70	190	243	116	139	0	75	308	89	857	354	1	234	0	24	452	65	0	0	157	0
CA_752_29	CA_752	2	CA	41.1007	-120.196	2286	20.5	308	75	162	20.1	159	60	55	197	7.1	-7.1	101	218	287	164	172	0	154	392	152	363	111	0	58	0	99	885	300	0	44	317	56
SFK_T_CR_43	SFK_Taylor_CR	2	MT+WY	45.15	-106.02	1127.76	45.4	43	130	221	28.7	79	53	51	129	11.5	-11.9	68	179	236	110	34	0	240	479	168	535	67	0	56	6	324	1400	429	0	111	349	88
CA_993_34	CA_993	2	CA	34.2605	-117.639	1828.8	21.5	484	26	91	17.1	158	63	64	267	12.5	-1.7	87	223	266	156	38	107	254	419	210	87	29	0	8	90	312	1245	620	0	92	393	106
Crystal_Springs_36	Crystal_Springs	2	MT+WY	44.5	-107.19	1828.8	12.9	145	150	313	21.7	181	53	58	269	3	-14.9	70	190	243	116	139	0	75	308	89	857	354	1	234	0	24	452	65	0	0	157	0
San_Fran_Peaks_34	San_Fran_Peaks	2	AZ+NM	35.33	-111.71	2743.2	15.3	268	196	295	20.1	189	44	51	225	4.3	-12.4	129	240	266	177	208	0	184	405	156	528	138	0	86	2	86	697	207	0	73	209	41
Wheeler_Creek_34	Wheeler_Creek	2	ID+WA	45.5	-114.17	1828.8	22.3	230	118	218	24.2	142	56	52	170	7.6	-9.9	66	175	243	113	184	0	162	407	117	554	105	0	102	0	147	993	263	0	46	289	44
Mount_Taylor_25	Mount_Taylor	2	AZ+NM	35.06	-108.08	2438.4	47.8	68	138	194	21.7	87	43	47	61	7.6	-10.7	128	237	263	174	35	0	299	490	233	337	56	0	37	19	255	1085	388	0	237	352	146
Northport_39	Northport	2	ID+WA	48.56	-117.48	396.24	14.3	373	156	282	22.4	258	60	53	232	6.7	-8.9	36	154	221	82	289	0	149	371	102	529	90	0	92	0	142	878	249	0	15	215	20
CA_301_7	CA_301	2	CA	41.7038	-123.569	1371.6	6.4	1444	110	305	17	857	60	54	772	10.7	-0.9	48	163	220	92	102	74	243	449	183	84	25	0	11	82	304	1248	639	0	0	340	27
Haden_Creek_27	Haden_Creek	2	ID+WA	48.27	-119.07	1127.76	37.3	123	83	154	23.2	95	58	52	115	7.6	-9	50	170	237	101	91	0	199	395	111	496	67	0	79	0	204	995	304	0	85	312	63
CA_752_14	CA_752	2	CA	41.1007	-120.196	2286	20.5	308	75	162	20.1	159	60	55	197	7.1	-7.1	101	218	287	164	172	0	154	392	152	363	111	0	58	0	99	885	300	0	44	317	56
CA_993_36	CA_993	2	CA	34.2605	-117.639	1828.8	21.5	484	26	91	17.1	158	63	64	267	12.5	-1.7	87	223	266	156	38	107	254	419	210	87	29	0	8	90	312	1245	620	0	92	393	106
CA_301_16	CA_301	2	CA	41.7038	-123.569	1371.6	6.4	1444	110	305	17	857	60	54	772	10.7	-0.9	48	163	220	92	102	74	243	449	183	84	25	0	11	82	304	1248	639	0	0	340	27
Tonata_Creek_38	Tonata_Creek	2	ID+WA	48.54	-118.44	609.6	20.7	227	127	219	22.7	162	62	58	182	7.7	-9.3	52	165	233	95	183	0	146	353	98	560	99	0	110	0	141	893	263	0	37	227	30
San_Fran_Peaks_25	San_Fran_Peaks	2	AZ+NM	35.33	-111.71	2743.2	15.3	268	196	295	20.1	189	44	51	225	4.3	-12.4	129	240	266	177	208	0	184	405	156	528	138	0	86	2	86	697	207	0	73	209	41
Doran_Creek_38	Doran_Creek	2	ID+WA	45.55	-114	1828.8	29.7	178	99	178	24.6	107	55	50	126	7.6	-9.9	66	175	242	114	141	0	171	426	123	544	90	0	94	0	176	1037	282	0	82	327	70
Woodruff_Park_16	Woodruff_Park	2	MT+WY	46.23	-105.36	944.88	48.1	33	138	234	31.7	72	53	52	112	12.4	-13.5	59	167	225	98	29	0	199	477	162	668	78	0	62	3	361	1463	440	0	103	338	89
Green_s_Peak_55	Green_s_Peak	2	AZ+NM	34.126	-109.535	2804.16	19.7	185	237	322	19	178	44	49	133	4.6	-12.4	125	238	256	168	121	0	202	425	210	426	111	0	61	6	123	755	251	0	144	188	51
Crystal_Springs_28	Crystal_Springs	2	MT+WY	44.5	-107.19	1828.8	12.9	145	150	313	21.7	181	53	58	269	3	-14.9	70	190	243	116	139	0	75	308	89	857	354	1	234	0	24	452	65	0	0	157	0
Dominion_13	Dominion	2	ID+WA	48.34	-117.47	1219.2	16.5	340	133	241	22.6	230	56	49	207	6.2	-9.2	58	171	239	111	252	0	200	401	113	499	77	0	86	0	170	928	272	0	39	268	33
Sheridan_Wyoming_21	Sheridan_Wyoming	2	MT+WY	44.36	-107.06	2133.6	12.5	136	171	342	21.1	168	53	58	281	2.7	-15.1	89	204	257	133	130	0	73	304	93	849	370	2	230	0	20	420	67	0	0	133	0
Woodruff_Park_41	Woodruff_Park	2	MT+WY	46.23	-105.36	944.88	48.1	33	138	234	31.7	72	53	52	112	12.4	-13.5	59	167	225	98	29	0	199	477	162	668	78	0	62	3	361	1463	440	0	103	338	89
Cap_Gap_18	Cap_Gap	2	AZ+NM	33.37	-105.28	2179.32	59.9	42	162	263	19.4	118	45	52	55	12.9	-4.8	99	224	250	143	2	149	392	541	282	78	9	0	6	130	690	1510	748	107	337	379	164
Cap_Gap_19	Cap_Gap	2	AZ+NM	33.37	-105.28	2179.32	59.9	42	162	263	19.4	118	45	52	55	12.9	-4.8	99	224	250	143	2	149	392	541	282	78	9	0	6	130	690	1510	748	107	337	379	164
Cherry_Road_63	Cherry_Road_	2	AZ+NM	34.586	-112.057	1591.97	49.8	116	142	206	20.8	118	48	52	78	13.4	-3.5	99	226	251	151	7	133	354	548	279	76	12	0	5	126	575	1568	821	17	276	406	161
CA_301_2	CA_301	2	CA	41.7038	-123.569	1371.6	6.4	1444	110	305	17	857	60	54	772	10.7	-0.9	48	163	220	92	102	74	243	449	183	84	25	0	11	82	304	1248	639	0	0	340	27
Mout_Taylor_36	Mount_Taylor	2	AZ+NM	35.06	-108.08	2438.4	47.8	68	138	194	21.7	87	43	47	61	7.6	-10.7	128	237	263	174	35	0	299	490	233	337	56	0	37	19	255	1085	388	0	237	352	146
Cap_Gap_15	Cap_Gap	2	AZ+NM	33.37	-105.28	2179.32	59.9	42	162	263	19.4	118	45	52	55	12.9	-4.8	99	224	250	143	2	149	392	541	282	78	9	0	6	130	690	1510	748	107	337	379	164
CA_321_3	CA_321	2	CA	41.8997	-122.864	1219.2	23.5	398	51	114	18.3	213	62	58	182	11.3	-1.4	100	200	269	161	42	66	235	423	169	108	26	0	12	59	302	1235	613	0	102	372	63
Green_s_Peak_64	Green_s_Peak	2	AZ+NM	34.126	-109.535	2804.16	19.7	185	237	322	19	178	44	49	133	4.6	-12.4	125	238	256	168	121	0	202	425	210	426	111	0	61	6	123	755	251	0	144	188	51
Sheridan_Wyoming_44	Sheridan_Wyoming	2	MT+WY	44.36	-107.06	2133.6	12.5	136	171	342	21.1	168	53	58	281	2.7	-15.1	89	204	257	133	130	0	73	304	93	849	370	2	230	0	20	420	67	0	0	133	0
Cap_Gap_25	Cap_Gap	2	AZ+NM	33.37	-105.28	2179.32	59.9	42	162	263	19.4	118	45	52	55	12.9	-4.8	99	224	250	143	2	149	392	541	282	78	9	0	6	130	690	1510	748	107	337	379	164
Dominon_1	Dominion	2	ID+WA	48.34	-117.47	1219.2	16.5	340	133	241	22.6	230	56	49	207	6.2	-9.2	58	171	239	111	252	0	200	401	113	499	77	0	86	0	170	928	272	0	39	268	33
Wheeler_Creek_2	Wheeler_Creek	2	ID+WA	45.5	-114.17	1828.8	22.3	230	118	218	24.2	142	56	52	170	7.6	-9.9	66	175	243	113	184	0	162	407	117	554	105	0	102	0	147	993	263	0	46	289	44
Woodruff_Park_32	Woodruff_Park	2	MT+WY	46.23	-105.36	944.88	48.1	33	138	234	31.7	72	53	52	112	12.4	-13.5	59	167	225	98	29	0	199	477	162	668	78	0	62	3	361	1463	440	0	103	338	89
Cap_Gap_27	Cap_Gap	2	AZ+NM	33.37	-105.28	2179.32	59.9	42	162	263	19.4	118	45	52	55	12.9	-4.8	99	224	250	143	2	149	392	541	282	78	9	0	6	130	690	1510	748	107	337	379	164
Dominon_43	Dominion	2	ID+WA	48.34	-117.47	1219.2	16.5	340	133	241	22.6	230	56	49	207	6.2	-9.2	58	171	239	111	252	0	200	401	113	499	77	0	86	0	170	928	272	0	39	268	33
Sheridan_Wyoming_35	Sheridan_Wyoming	2	MT+WY	44.36	-107.06	2133.6	12.5	136	171	342	21.1	168	53	58	281	2.7	-15.1	89	204	257	133	130	0	73	304	93	849	370	2	230	0	20	420	67	0	0	133	0
CA_533_54	CA_533	2	CA	37.1263	-119.28	1676.4	22.6	438	25	76	16.5	176	58	55	256	10.6	-2.4	86	221	278	159	29	108	264	462	223	79	26	0	8	96	313	1228	627	0	90	437	121
Wheeler_creek_20	Wheeler_Creek	2	ID+WA	45.5	-114.17	1828.8	22.3	230	118	218	24.2	142	56	52	170	7.6	-9.9	66	175	243	113	184	0	162	407	117	554	105	0	102	0	147	993	263	0	46	289	44
Green_s_Peak_45	Green_s_Peak	2	AZ+NM	34.126	-109.535	2804.16	19.7	185	237	322	19	178	44	49	133	4.6	-12.4	125	238	256	168	121	0	202	425	210	426	111	0	61	6	123	755	251	0	144	188	51
UER_25	UER	2	AZ+NM	33.555	-109.193	1737.36	40.7	119	203	280	20.3	150	39	45	56	10.8	-6.6	105	228	243	151	11	146	391	574	292	103	14	0	8	93	540	1450	699	37	335	372	142
Green_s_Peak_50	Green_s_Peak	2	AZ+NM	34.126	-109.535	2804.16	19.7	185	237	322	19	178	44	49	133	4.6	-12.4	125	238	256	168	121	0	202	425	210	426	111	0	61	6	123	755	251	0	144	188	51
Cap_Gap_230	Cap_Gap	2	AZ+NM	33.37	-105.28	2179.32	59.9	42	162	263	19.4	118	45	52	55	12.9	-4.8	99	224	250	143	2	149	392	541	282	78	9	0	6	130	690	1510	748	107	337	379	164
UER_10	UER	2	AZ+NM	33.555	-109.193	1737.36	40.7	119	203	280	20.3	150	39	45	56	10.8	-6.6	105	228	243	151	11	146	391	574	292	103	14	0	8	93	540	1450	699	37	335	372	142
CA_301_20	CA_301	2	CA	41.7038	-123.569	1371.6	6.4	1444	110	305	17	857	60	54	772	10.7	-0.9	48	163	220	92	102	74	243	449	183	84	25	0	11	82	304	1248	639	0	0	340	27
Cap_Gap_31	Cap_Gap	2	AZ+NM	33.37	-105.28	2179.32	59.9	42	162	263	19.4	118	45	52	55	12.9	-4.8	99	224	250	143	2	149	392	541	282	78	9	0	6	130	690	1510	748	107	337	379	164
Tonata_Creek_18	Tonata_Creek	2	ID+WA	48.54	-118.44	609.6	20.7	227	127	219	22.7	162	62	58	182	7.7	-9.3	52	165	233	95	183	0	146	353	98	560	99	0	110	0	141	893	263	0	37	227	30
Woodruff_Park_1	Woodruff_Park	2	MT+WY	46.23	-105.36	944.88	48.1	33	138	234	31.7	72	53	52	112	12.4	-13.5	59	167	225	98	29	0	199	477	162	668	78	0	62	3	361	1463	440	0	103	338	89
Tonata_Creek_13	Tonata_Creek	2	ID+WA	48.54	-118.44	609.6	20.7	227	127	219	22.7	162	62	58	182	7.7	-9.3	52	165	233	95	183	0	146	353	98	560	99	0	110	0	141	893	263	0	37	227	30
San_Fran_Peaks_24	San_Fran_Peaks	2	AZ+NM	35.33	-111.71	2743.2	15.3	268	196	295	20.1	189	44	51	225	4.3	-12.4	129	240	266	177	208	0	184	405	156	528	138	0	86	2	86	697	207	0	73	209	41
Upper_Enterprise_Res(UER)_3	UER	2	AZ+NM	33.555	-109.193	1737.36	40.7	119	203	280	20.3	150	39	45	56	10.8	-6.6	105	228	243	151	11	146	391	574	292	103	14	0	8	93	540	1450	699	37	335	372	142
San_Fran_Peaks_38	San_Fran_Peaks	2	AZ+NM	35.33	-111.71	2743.2	15.3	268	196	295	20.1	189	44	51	225	4.3	-12.4	129	240	266	177	208	0	184	405	156	528	138	0	86	2	86	697	207	0	73	209	41
SFK_T_CR_7	SFK_Taylor_CR	2	MT+WY	45.15	-106.02	1127.76	45.4	43	130	221	28.7	79	53	51	129	11.5	-11.9	68	179	236	110	34	0	240	479	168	535	67	0	56	6	324	1400	429	0	111	349	88
Cap_Gap_24	Cap_Gap	2	AZ+NM	33.37	-105.28	2179.32	59.9	42	162	263	19.4	118	45	52	55	12.9	-4.8	99	224	250	143	2	149	392	541	282	78	9	0	6	130	690	1510	748	107	337	379	164
San_Fran_Peaks_8	San_Fran_Peaks	2	AZ+NM	35.33	-111.71	2743.2	15.3	268	196	295	20.1	189	44	51	225	4.3	-12.4	129	240	266	177	208	0	184	405	156	528	138	0	86	2	86	697	207	0	73	209	41
Dominion_31	Dominion	2	ID+WA	48.34	-117.47	1219.2	16.5	340	133	241	22.6	230	56	49	207	6.2	-9.2	58	171	239	111	252	0	200	401	113	499	77	0	86	0	170	928	272	0	39	268	33
Northport_30	Northport	2	ID+WA	48.56	-117.48	396.24	14.3	373	156	282	22.4	258	60	53	232	6.7	-8.9	36	154	221	82	289	0	149	371	102	529	90	0	92	0	142	878	249	0	15	215	20
CA_301_12	CA_301	2	CA	41.7038	-123.569	1371.6	6.4	1444	110	305	17	857	60	54	772	10.7	-0.9	48	163	220	92	102	74	243	449	183	84	25	0	11	82	304	1248	639	0	0	340	27
CA_321_22	CA_321	2	CA	41.8997	-122.864	1219.2	23.5	398	51	114	18.3	213	62	58	182	11.3	-1.4	100	200	269	161	42	66	235	423	169	108	26	0	12	59	302	1235	613	0	102	372	63
Sheridan_Wyoming_6	Sheridan_Wyoming	2	MT+WY	44.36	-107.06	2133.6	12.5	136	171	342	21.1	168	53	58	281	2.7	-15.1	89	204	257	133	130	0	73	304	93	849	370	2	230	0	20	420	67	0	0	133	0
Rock_Creek_39	Rock_Creek_	2	MT+WY	46.52	-109.31	1463.04	47.8	35	144	227	25.5	61	52	50	98	8.9	-11.1	65	173	229	107	26	0	185	437	152	500	88	0	60	2	240	1155	348	0	103	293	91
CA_993_38	CA_993	2	CA	34.2605	-117.639	1828.8	21.5	484	26	91	17.1	158	63	64	267	12.5	-1.7	87	223	266	156	38	107	254	419	210	87	29	0	8	90	312	1245	620	0	92	393	106
Rock_Creek_19	Rock_Creek_	2	MT+WY	46.52	-109.31	1463.04	47.8	35	144	227	25.5	61	52	50	98	8.9	-11.1	65	173	229	107	26	0	185	437	152	500	88	0	60	2	240	1155	348	0	103	293	91
Cherry_Road_27	Cherry_Road_	2	AZ+NM	34.586	-112.057	1591.97	49.8	116	142	206	20.8	118	48	52	78	13.4	-3.5	99	226	251	151	7	133	354	548	279	76	12	0	5	126	575	1568	821	17	276	406	161
Woodruff_Park_28	Woodruff_Park	2	MT+WY	46.23	-105.36	944.88	48.1	33	138	234	31.7	72	53	52	112	12.4	-13.5	59	167	225	98	29	0	199	477	162	668	78	0	62	3	361	1463	440	0	103	338	89
Crystal_springs_1	Crystal_Springs	2	MT+WY	44.5	-107.19	1828.8	12.9	145	150	313	21.7	181	53	58	269	3	-14.9	70	190	243	116	139	0	75	308	89	857	354	1	234	0	24	452	65	0	0	157	0
Rock_Creek_41	Rock_Creek_	2	MT+WY	46.52	-109.31	1463.04	47.8	35	144	227	25.5	61	52	50	98	8.9	-11.1	65	173	229	107	26	0	185	437	152	500	88	0	60	2	240	1155	348	0	103	293	91
Crystal_Springs_5	Crystal_Springs	2	MT+WY	44.5	-107.19	1828.8	12.9	145	150	313	21.7	181	53	58	269	3	-14.9	70	190	243	116	139	0	75	308	89	857	354	1	234	0	24	452	65	0	0	157	0
Dominon_22	Dominion	2	ID+WA	48.34	-117.47	1219.2	16.5	340	133	241	22.6	230	56	49	207	6.2	-9.2	58	171	239	111	252	0	200	401	113	499	77	0	86	0	170	928	272	0	39	268	33
CA_533_37	CA_533	2	CA	37.1263	-119.28	1676.4	22.6	438	25	76	16.5	176	58	55	256	10.6	-2.4	86	221	278	159	29	108	264	462	223	79	26	0	8	96	313	1228	627	0	90	437	121
CA_524_31	CA_524	2	CA	39.9595	-121.606	1066.8	13.8	798	37	127	17.3	404	59	52	411	12.5	0.7	72	197	274	141	25	92	285	505	222	50	10	0	4	165	529	1465	839	0	81	468	75
Green_s_Peak_60	Green_s_Peak	2	AZ+NM	34.126	-109.535	2804.16	19.7	185	237	322	19	178	44	49	133	4.6	-12.4	125	238	256	168	121	0	202	425	210	426	111	0	61	6	123	755	251	0	144	188	51
Hangman_s_Creek_13	Hangman’s_Creek	2	MT+WY	45.48	-109.41	1371.6	40.1	48	128	258	25.1	99	55	53	164	10.6	-9	64	169	227	105	27	0	231	447	160	369	60	0	36	9	299	1272	433	0	67	318	61
Northport_1	Northport	2	ID+WA	48.56	-117.48	396.24	14.3	373	156	282	22.4	258	60	53	232	6.7	-8.9	36	154	221	82	289	0	149	371	102	529	90	0	92	0	142	878	249	0	15	215	20
Wheeler_Creek_21	Wheeler_Creek	2	ID+WA	45.5	-114.17	1828.8	22.3	230	118	218	24.2	142	56	52	170	7.6	-9.9	66	175	243	113	184	0	162	407	117	554	105	0	102	0	147	993	263	0	46	289	44
CA_524_18	CA_524	2	CA	39.9595	-121.606	1066.8	13.8	798	37	127	17.3	404	59	52	411	12.5	0.7	72	197	274	141	25	92	285	505	222	50	10	0	4	165	529	1465	839	0	81	468	75
CA_301_18	CA_301	2	CA	41.7038	-123.569	1371.6	6.4	1444	110	305	17	857	60	54	772	10.7	-0.9	48	163	220	92	102	74	243	449	183	84	25	0	11	82	304	1248	639	0	0	340	27
Doran_Creek_34	Doran_Creek	2	ID+WA	45.55	-114	1828.8	29.7	178	99	178	24.6	107	55	50	126	7.6	-9.9	66	175	242	114	141	0	171	426	123	544	90	0	94	0	176	1037	282	0	82	327	70
Crystal_Springs_30	Crystal_Springs	2	MT+WY	44.5	-107.19	1828.8	12.9	145	150	313	21.7	181	53	58	269	3	-14.9	70	190	243	116	139	0	75	308	89	857	354	1	234	0	24	452	65	0	0	157	0
Northport_27	Northport	2	ID+WA	48.56	-117.48	396.24	14.3	373	156	282	22.4	258	60	53	232	6.7	-8.9	36	154	221	82	289	0	149	371	102	529	90	0	92	0	142	878	249	0	15	215	20
Tonata_Creek_12	Tonata_Creek	2	ID+WA	48.54	-118.44	609.6	20.7	227	127	219	22.7	162	62	58	182	7.7	-9.3	52	165	233	95	183	0	146	353	98	560	99	0	110	0	141	893	263	0	37	227	30
Doran_Creek_48	Doran_Creek	2	ID+WA	45.55	-114	1828.8	29.7	178	99	178	24.6	107	55	50	126	7.6	-9.9	66	175	242	114	141	0	171	426	123	544	90	0	94	0	176	1037	282	0	82	327	70
Dominon_25	Dominion	2	ID+WA	48.34	-117.47	1219.2	16.5	340	133	241	22.6	230	56	49	207	6.2	-9.2	58	171	239	111	252	0	200	401	113	499	77	0	86	0	170	928	272	0	39	268	33
Northport_2	Northport	2	ID+WA	48.56	-117.48	396.24	14.3	373	156	282	22.4	258	60	53	232	6.7	-8.9	36	154	221	82	289	0	149	371	102	529	90	0	92	0	142	878	249	0	15	215	20
CA_524_46	CA_524	2	CA	39.9595	-121.606	1066.8	13.8	798	37	127	17.3	404	59	52	411	12.5	0.7	72	197	274	141	25	92	285	505	222	50	10	0	4	165	529	1465	839	0	81	468	75
Cap_Gap_22	Cap_Gap	2	AZ+NM	33.37	-105.28	2179.32	59.9	42	162	263	19.4	118	45	52	55	12.9	-4.8	99	224	250	143	2	149	392	541	282	78	9	0	6	130	690	1510	748	107	337	379	164
Cap_Gap_35	Cap_Gap	2	AZ+NM	33.37	-105.28	2179.32	59.9	42	162	263	19.4	118	45	52	55	12.9	-4.8	99	224	250	143	2	149	392	541	282	78	9	0	6	130	690	1510	748	107	337	379	164
Cherry_road_22	Cherry_Road_	2	AZ+NM	34.586	-112.057	1591.97	49.8	116	142	206	20.8	118	48	52	78	13.4	-3.5	99	226	251	151	7	133	354	548	279	76	12	0	5	126	575	1568	821	17	276	406	161
Woodruff_park_6	Woodruff_Park	2	MT+WY	46.23	-105.36	944.88	48.1	33	138	234	31.7	72	53	52	112	12.4	-13.5	59	167	225	98	29	0	199	477	162	668	78	0	62	3	361	1463	440	0	103	338	89
CA_752_37	CA_752	2	CA	41.1007	-120.196	2286	20.5	308	75	162	20.1	159	60	55	197	7.1	-7.1	101	218	287	164	172	0	154	392	152	363	111	0	58	0	99	885	300	0	44	317	56
Tonata_Creek_19	Tonata_Creek	2	ID+WA	48.54	-118.44	609.6	20.7	227	127	219	22.7	162	62	58	182	7.7	-9.3	52	165	233	95	183	0	146	353	98	560	99	0	110	0	141	893	263	0	37	227	30
Doran_Creek_13	Doran_Creek	2	ID+WA	45.55	-114	1828.8	29.7	178	99	178	24.6	107	55	50	126	7.6	-9.9	66	175	242	114	141	0	171	426	123	544	90	0	94	0	176	1037	282	0	82	327	70
CA_321_19	CA_321	2	CA	41.8997	-122.864	1219.2	23.5	398	51	114	18.3	213	62	58	182	11.3	-1.4	100	200	269	161	42	66	235	423	169	108	26	0	12	59	302	1235	613	0	102	372	63
Crystal_Springs_3	Crystal_Springs	2	MT+WY	44.5	-107.19	1828.8	12.9	145	150	313	21.7	181	53	58	269	3	-14.9	70	190	243	116	139	0	75	308	89	857	354	1	234	0	24	452	65	0	0	157	0
Cherry_Road_21	Cherry_Road_	2	AZ+NM	34.586	-112.057	1591.97	49.8	116	142	206	20.8	118	48	52	78	13.4	-3.5	99	226	251	151	7	133	354	548	279	76	12	0	5	126	575	1568	821	17	276	406	161
CA_993_53	CA_993	2	CA	34.2605	-117.639	1828.8	21.5	484	26	91	17.1	158	63	64	267	12.5	-1.7	87	223	266	156	38	107	254	419	210	87	29	0	8	90	312	1245	620	0	92	393	106
Cap_Gap_17	Cap_Gap	2	AZ+NM	33.37	-105.28	2179.32	59.9	42	162	263	19.4	118	45	52	55	12.9	-4.8	99	224	250	143	2	149	392	541	282	78	9	0	6	130	690	1510	748	107	337	379	164
Cherry_Road_44	Cherry_Road_	2	AZ+NM	34.586	-112.057	1591.97	49.8	116	142	206	20.8	118	48	52	78	13.4	-3.5	99	226	251	151	7	133	354	548	279	76	12	0	5	126	575	1568	821	17	276	406	161
Woodruff_Park_19	Woodruff_Park	2	MT+WY	46.23	-105.36	944.88	48.1	33	138	234	31.7	72	53	52	112	12.4	-13.5	59	167	225	98	29	0	199	477	162	668	78	0	62	3	361	1463	440	0	103	338	89
CA_524_2	CA_524	2	CA	39.9595	-121.606	1066.8	13.8	798	37	127	17.3	404	59	52	411	12.5	0.7	72	197	274	141	25	92	285	505	222	50	10	0	4	165	529	1465	839	0	81	468	75
UER_38	UER	2	AZ+NM	33.555	-109.193	1737.36	40.7	119	203	280	20.3	150	39	45	56	10.8	-6.6	105	228	243	151	11	146	391	574	292	103	14	0	8	93	540	1450	699	37	335	372	142
Haden_Creek_32	Haden_Creek	2	ID+WA	48.27	-119.07	1127.76	37.3	123	83	154	23.2	95	58	52	115	7.6	-9	50	170	237	101	91	0	199	395	111	496	67	0	79	0	204	995	304	0	85	312	63
Crystal_Springs_8	Crystal_Springs	2	MT+WY	44.5	-107.19	1828.8	12.9	145	150	313	21.7	181	53	58	269	3	-14.9	70	190	243	116	139	0	75	308	89	857	354	1	234	0	24	452	65	0	0	157	0
Cap_Gap_30	Cap_Gap	2	AZ+NM	33.37	-105.28	2179.32	59.9	42	162	263	19.4	118	45	52	55	12.9	-4.8	99	224	250	143	2	149	392	541	282	78	9	0	6	130	690	1510	748	107	337	379	164
Green_s_Peak_66	Green_s_Peak	2	AZ+NM	34.126	-109.535	2804.16	19.7	185	237	322	19	178	44	49	133	4.6	-12.4	125	238	256	168	121	0	202	425	210	426	111	0	61	6	123	755	251	0	144	188	51
Dominion_10	Dominion	2	ID+WA	48.34	-117.47	1219.2	16.5	340	133	241	22.6	230	56	49	207	6.2	-9.2	58	171	239	111	252	0	200	401	113	499	77	0	86	0	170	928	272	0	39	268	33
CA_752_13	CA_752	2	CA	41.1007	-120.196	2286	20.5	308	75	162	20.1	159	60	55	197	7.1	-7.1	101	218	287	164	172	0	154	392	152	363	111	0	58	0	99	885	300	0	44	317	56
CA_301_9	CA_301	2	CA	41.7038	-123.569	1371.6	6.4	1444	110	305	17	857	60	54	772	10.7	-0.9	48	163	220	92	102	74	243	449	183	84	25	0	11	82	304	1248	639	0	0	340	27
Woodruff_park_12	Woodruff_Park	2	MT+WY	46.23	-105.36	944.88	48.1	33	138	234	31.7	72	53	52	112	12.4	-13.5	59	167	225	98	29	0	199	477	162	668	78	0	62	3	361	1463	440	0	103	338	89
Green_s_Peak_61	Green_s_Peak	2	AZ+NM	34.126	-109.535	2804.16	19.7	185	237	322	19	178	44	49	133	4.6	-12.4	125	238	256	168	121	0	202	425	210	426	111	0	61	6	123	755	251	0	144	188	51
Cherry_Road_55	Cherry_Road_	2	AZ+NM	34.586	-112.057	1591.97	49.8	116	142	206	20.8	118	48	52	78	13.4	-3.5	99	226	251	151	7	133	354	548	279	76	12	0	5	126	575	1568	821	17	276	406	161
SFK_Taylor_CR_29	SFK_Taylor_CR	2	MT+WY	45.15	-106.02	1127.76	45.4	43	130	221	28.7	79	53	51	129	11.5	-11.9	68	179	236	110	34	0	240	479	168	535	67	0	56	6	324	1400	429	0	111	349	88
Woodruff_Park_42	Woodruff_Park	2	MT+WY	46.23	-105.36	944.88	48.1	33	138	234	31.7	72	53	52	112	12.4	-13.5	59	167	225	98	29	0	199	477	162	668	78	0	62	3	361	1463	440	0	103	338	89
Rock_Creek_1	Rock_Creek_	2	MT+WY	46.52	-109.31	1463.04	47.8	35	144	227	25.5	61	52	50	98	8.9	-11.1	65	173	229	107	26	0	185	437	152	500	88	0	60	2	240	1155	348	0	103	293	91
Sheridan_Wyoming_47	Sheridan_Wyoming	2	MT+WY	44.36	-107.06	2133.6	12.5	136	171	342	21.1	168	53	58	281	2.7	-15.1	89	204	257	133	130	0	73	304	93	849	370	2	230	0	20	420	67	0	0	133	0
Haden_Creek_35	Haden_Creek	2	ID+WA	48.27	-119.07	1127.76	37.3	123	83	154	23.2	95	58	52	115	7.6	-9	50	170	237	101	91	0	199	395	111	496	67	0	79	0	204	995	304	0	85	312	63
Haden_Creek_40	Haden_Creek	2	ID+WA	48.27	-119.07	1127.76	37.3	123	83	154	23.2	95	58	52	115	7.6	-9	50	170	237	101	91	0	199	395	111	496	67	0	79	0	204	995	304	0	85	312	63
CA_524_17	CA_524	2	CA	39.9595	-121.606	1066.8	13.8	798	37	127	17.3	404	59	52	411	12.5	0.7	72	197	274	141	25	92	285	505	222	50	10	0	4	165	529	1465	839	0	81	468	75
CA_533_31	CA_533	2	CA	37.1263	-119.28	1676.4	22.6	438	25	76	16.5	176	58	55	256	10.6	-2.4	86	221	278	159	29	108	264	462	223	79	26	0	8	96	313	1228	627	0	90	437	121
Cap_Gap_14	Cap_Gap	2	AZ+NM	33.37	-105.28	2179.32	59.9	42	162	263	19.4	118	45	52	55	12.9	-4.8	99	224	250	143	2	149	392	541	282	78	9	0	6	130	690	1510	748	107	337	379	164
Cherry_Road_41	Cherry_Road_	2	AZ+NM	34.586	-112.057	1591.97	49.8	116	142	206	20.8	118	48	52	78	13.4	-3.5	99	226	251	151	7	133	354	548	279	76	12	0	5	126	575	1568	821	17	276	406	161
Wheeler_Creek_22	Wheeler_Creek	2	ID+WA	45.5	-114.17	1828.8	22.3	230	118	218	24.2	142	56	52	170	7.6	-9.9	66	175	243	113	184	0	162	407	117	554	105	0	102	0	147	993	263	0	46	289	44
Tonata_Creek_39	Tonata_Creek	2	ID+WA	48.54	-118.44	609.6	20.7	227	127	219	22.7	162	62	58	182	7.7	-9.3	52	165	233	95	183	0	146	353	98	560	99	0	110	0	141	893	263	0	37	227	30
Tonata_Creek_26	Tonata_Creek	2	ID+WA	48.54	-118.44	609.6	20.7	227	127	219	22.7	162	62	58	182	7.7	-9.3	52	165	233	95	183	0	146	353	98	560	99	0	110	0	141	893	263	0	37	227	30
Green_s_Peak_59	Green_s_Peak	2	AZ+NM	34.126	-109.535	2804.16	19.7	185	237	322	19	178	44	49	133	4.6	-12.4	125	238	256	168	121	0	202	425	210	426	111	0	61	6	123	755	251	0	144	188	51
CA_993_48	CA_993	2	CA	34.2605	-117.639	1828.8	21.5	484	26	91	17.1	158	63	64	267	12.5	-1.7	87	223	266	156	38	107	254	419	210	87	29	0	8	90	312	1245	620	0	92	393	106
Woodruff_park_13	Woodruff_Park	2	MT+WY	46.23	-105.36	944.88	48.1	33	138	234	31.7	72	53	52	112	12.4	-13.5	59	167	225	98	29	0	199	477	162	668	78	0	62	3	361	1463	440	0	103	338	89
Wheeler_Creek_51	Wheeler_Creek	2	ID+WA	45.5	-114.17	1828.8	22.3	230	118	218	24.2	142	56	52	170	7.6	-9.9	66	175	243	113	184	0	162	407	117	554	105	0	102	0	147	993	263	0	46	289	44
Doran_Creek_46	Doran_Creek	2	ID+WA	45.55	-114	1828.8	29.7	178	99	178	24.6	107	55	50	126	7.6	-9.9	66	175	242	114	141	0	171	426	123	544	90	0	94	0	176	1037	282	0	82	327	70
Green_s_Peak_63	Green_s_Peak	2	AZ+NM	34.126	-109.535	2804.16	19.7	185	237	322	19	178	44	49	133	4.6	-12.4	125	238	256	168	121	0	202	425	210	426	111	0	61	6	123	755	251	0	144	188	51
Sheridan_Wyoming_31	Sheridan_Wyoming	2	MT+WY	44.36	-107.06	2133.6	12.5	136	171	342	21.1	168	53	58	281	2.7	-15.1	89	204	257	133	130	0	73	304	93	849	370	2	230	0	20	420	67	0	0	133	0
CA_993_21	CA_993	2	CA	34.2605	-117.639	1828.8	21.5	484	26	91	17.1	158	63	64	267	12.5	-1.7	87	223	266	156	38	107	254	419	210	87	29	0	8	90	312	1245	620	0	92	393	106
CA_524_34	CA_524	2	CA	39.9595	-121.606	1066.8	13.8	798	37	127	17.3	404	59	52	411	12.5	0.7	72	197	274	141	25	92	285	505	222	50	10	0	4	165	529	1465	839	0	81	468	75
Sheridan_Wyoming_17	Sheridan_Wyoming	2	MT+WY	44.36	-107.06	2133.6	12.5	136	171	342	21.1	168	53	58	281	2.7	-15.1	89	204	257	133	130	0	73	304	93	849	370	2	230	0	20	420	67	0	0	133	0
CA_993_33	CA_993	2	CA	34.2605	-117.639	1828.8	21.5	484	26	91	17.1	158	63	64	267	12.5	-1.7	87	223	266	156	38	107	254	419	210	87	29	0	8	90	312	1245	620	0	92	393	106
CA_524_16	CA_524	2	CA	39.9595	-121.606	1066.8	13.8	798	37	127	17.3	404	59	52	411	12.5	0.7	72	197	274	141	25	92	285	505	222	50	10	0	4	165	529	1465	839	0	81	468	75
Doran_Creek_53	Doran_Creek	2	ID+WA	45.55	-114	1828.8	29.7	178	99	178	24.6	107	55	50	126	7.6	-9.9	66	175	242	114	141	0	171	426	123	544	90	0	94	0	176	1037	282	0	82	327	70
San_Fran_Peaks_32	San_Fran_Peaks	2	AZ+NM	35.33	-111.71	2743.2	15.3	268	196	295	20.1	189	44	51	225	4.3	-12.4	129	240	266	177	208	0	184	405	156	528	138	0	86	2	86	697	207	0	73	209	41
Sheridan_Wyoming_15	Sheridan_Wyoming	2	MT+WY	44.36	-107.06	2133.6	12.5	136	171	342	21.1	168	53	58	281	2.7	-15.1	89	204	257	133	130	0	73	304	93	849	370	2	230	0	20	420	67	0	0	133	0
Tonata_Creek_28	Tonata_Creek	2	ID+WA	48.54	-118.44	609.6	20.7	227	127	219	22.7	162	62	58	182	7.7	-9.3	52	165	233	95	183	0	146	353	98	560	99	0	110	0	141	893	263	0	37	227	30
CA_993_2	CA_993	2	CA	34.2605	-117.639	1828.8	21.5	484	26	91	17.1	158	63	64	267	12.5	-1.7	87	223	266	156	38	107	254	419	210	87	29	0	8	90	312	1245	620	0	92	393	106
UER_32	UER	2	AZ+NM	33.555	-109.193	1737.36	40.7	119	203	280	20.3	150	39	45	56	10.8	-6.6	105	228	243	151	11	146	391	574	292	103	14	0	8	93	540	1450	699	37	335	372	142
Northport_7	Northport	2	ID+WA	48.56	-117.48	396.24	14.3	373	156	282	22.4	258	60	53	232	6.7	-8.9	36	154	221	82	289	0	149	371	102	529	90	0	92	0	142	878	249	0	15	215	20
Sheridan_Wyoming_37	Sheridan_Wyoming	2	MT+WY	44.36	-107.06	2133.6	12.5	136	171	342	21.1	168	53	58	281	2.7	-15.1	89	204	257	133	130	0	73	304	93	849	370	2	230	0	20	420	67	0	0	133	0
Tonata_Creek_42	Tonata_Creek	2	ID+WA	48.54	-118.44	609.6	20.7	227	127	219	22.7	162	62	58	182	7.7	-9.3	52	165	233	95	183	0	146	353	98	560	99	0	110	0	141	893	263	0	37	227	30
UER_37	UER	2	AZ+NM	33.555	-109.193	1737.36	40.7	119	203	280	20.3	150	39	45	56	10.8	-6.6	105	228	243	151	11	146	391	574	292	103	14	0	8	93	540	1450	699	37	335	372	142
Woodruff_Park_37	Woodruff_Park	2	MT+WY	46.23	-105.36	944.88	48.1	33	138	234	31.7	72	53	52	112	12.4	-13.5	59	167	225	98	29	0	199	477	162	668	78	0	62	3	361	1463	440	0	103	338	89
San_Fran_Peaks_23	San_Fran_Peaks	2	AZ+NM	35.33	-111.71	2743.2	15.3	268	196	295	20.1	189	44	51	225	4.3	-12.4	129	240	266	177	208	0	184	405	156	528	138	0	86	2	86	697	207	0	73	209	41
CA_993_12	CA_993	2	CA	34.2605	-117.639	1828.8	21.5	484	26	91	17.1	158	63	64	267	12.5	-1.7	87	223	266	156	38	107	254	419	210	87	29	0	8	90	312	1245	620	0	92	393	106
CA_533_28	CA_533	2	CA	37.1263	-119.28	1676.4	22.6	438	25	76	16.5	176	58	55	256	10.6	-2.4	86	221	278	159	29	108	264	462	223	79	26	0	8	96	313	1228	627	0	90	437	121
San_Fran_Peaks_37	San_Fran_Peaks	2	AZ+NM	35.33	-111.71	2743.2	15.3	268	196	295	20.1	189	44	51	225	4.3	-12.4	129	240	266	177	208	0	184	405	156	528	138	0	86	2	86	697	207	0	73	209	41
San_Fran_Peaks_11	San_Fran_Peaks	2	AZ+NM	35.33	-111.71	2743.2	15.3	268	196	295	20.1	189	44	51	225	4.3	-12.4	129	240	266	177	208	0	184	405	156	528	138	0	86	2	86	697	207	0	73	209	41
CA_533_25	CA_533	2	CA	37.1263	-119.28	1676.4	22.6	438	25	76	16.5	176	58	55	256	10.6	-2.4	86	221	278	159	29	108	264	462	223	79	26	0	8	96	313	1228	627	0	90	437	121
Tonata_Creek_15	Tonata_Creek	2	ID+WA	48.54	-118.44	609.6	20.7	227	127	219	22.7	162	62	58	182	7.7	-9.3	52	165	233	95	183	0	146	353	98	560	99	0	110	0	141	893	263	0	37	227	30
CA_524_11	CA_524	2	CA	39.9595	-121.606	1066.8	13.8	798	37	127	17.3	404	59	52	411	12.5	0.7	72	197	274	141	25	92	285	505	222	50	10	0	4	165	529	1465	839	0	81	468	75
UER_26	UER	2	AZ+NM	33.555	-109.193	1737.36	40.7	119	203	280	20.3	150	39	45	56	10.8	-6.6	105	228	243	151	11	146	391	574	292	103	14	0	8	93	540	1450	699	37	335	372	142
CA_752_23	CA_752	2	CA	41.1007	-120.196	2286	20.5	308	75	162	20.1	159	60	55	197	7.1	-7.1	101	218	287	164	172	0	154	392	152	363	111	0	58	0	99	885	300	0	44	317	56
CA_752_50	CA_752	2	CA	41.1007	-120.196	2286	20.5	308	75	162	20.1	159	60	55	197	7.1	-7.1	101	218	287	164	172	0	154	392	152	363	111	0	58	0	99	885	300	0	44	317	56
Sheridan_Wyoming_22	Sheridan_Wyoming	2	MT+WY	44.36	-107.06	2133.6	12.5	136	171	342	21.1	168	53	58	281	2.7	-15.1	89	204	257	133	130	0	73	304	93	849	370	2	230	0	20	420	67	0	0	133	0
CA_524_45	CA_524	2	CA	39.9595	-121.606	1066.8	13.8	798	37	127	17.3	404	59	52	411	12.5	0.7	72	197	274	141	25	92	285	505	222	50	10	0	4	165	529	1465	839	0	81	468	75
Dominion_12	Dominion	2	ID+WA	48.34	-117.47	1219.2	16.5	340	133	241	22.6	230	56	49	207	6.2	-9.2	58	171	239	111	252	0	200	401	113	499	77	0	86	0	170	928	272	0	39	268	33
Tonata_Creek_29	Tonata_Creek	2	ID+WA	48.54	-118.44	609.6	20.7	227	127	219	22.7	162	62	58	182	7.7	-9.3	52	165	233	95	183	0	146	353	98	560	99	0	110	0	141	893	263	0	37	227	30
Woodruff_park_4	Woodruff_Park	2	MT+WY	46.23	-105.36	944.88	48.1	33	138	234	31.7	72	53	52	112	12.4	-13.5	59	167	225	98	29	0	199	477	162	668	78	0	62	3	361	1463	440	0	103	338	89
CA_524_51	CA_524	2	CA	39.9595	-121.606	1066.8	13.8	798	37	127	17.3	404	59	52	411	12.5	0.7	72	197	274	141	25	92	285	505	222	50	10	0	4	165	529	1465	839	0	81	468	75
Wheeler_Creek_13	Wheeler_Creek	2	ID+WA	45.5	-114.17	1828.8	22.3	230	118	218	24.2	142	56	52	170	7.6	-9.9	66	175	243	113	184	0	162	407	117	554	105	0	102	0	147	993	263	0	46	289	44
Cap_Gap_36	Cap_Gap	2	AZ+NM	33.37	-105.28	2179.32	59.9	42	162	263	19.4	118	45	52	55	12.9	-4.8	99	224	250	143	2	149	392	541	282	78	9	0	6	130	690	1510	748	107	337	379	164
CA_993_40	CA_993	2	CA	34.2605	-117.639	1828.8	21.5	484	26	91	17.1	158	63	64	267	12.5	-1.7	87	223	266	156	38	107	254	419	210	87	29	0	8	90	312	1245	620	0	92	393	106
UER_22	UER	2	AZ+NM	33.555	-109.193	1737.36	40.7	119	203	280	20.3	150	39	45	56	10.8	-6.6	105	228	243	151	11	146	391	574	292	103	14	0	8	93	540	1450	699	37	335	372	142
CA_993_1	CA_993	2	CA	34.2605	-117.639	1828.8	21.5	484	26	91	17.1	158	63	64	267	12.5	-1.7	87	223	266	156	38	107	254	419	210	87	29	0	8	90	312	1245	620	0	92	393	106
Cherry_road_6	Cherry_Road_	2	AZ+NM	34.586	-112.057	1591.97	49.8	116	142	206	20.8	118	48	52	78	13.4	-3.5	99	226	251	151	7	133	354	548	279	76	12	0	5	126	575	1568	821	17	276	406	161
Tonata_Creek_22	Tonata_Creek	2	ID+WA	48.54	-118.44	609.6	20.7	227	127	219	22.7	162	62	58	182	7.7	-9.3	52	165	233	95	183	0	146	353	98	560	99	0	110	0	141	893	263	0	37	227	30
Cap_Gap_29	Cap_Gap	2	AZ+NM	33.37	-105.28	2179.32	59.9	42	162	263	19.4	118	45	52	55	12.9	-4.8	99	224	250	143	2	149	392	541	282	78	9	0	6	130	690	1510	748	107	337	379	164
Wheeler_Creek_57	Wheeler_Creek	2	ID+WA	45.5	-114.17	1828.8	22.3	230	118	218	24.2	142	56	52	170	7.6	-9.9	66	175	243	113	184	0	162	407	117	554	105	0	102	0	147	993	263	0	46	289	44
Woodruff_Park_8	Woodruff_Park	2	MT+WY	46.23	-105.36	944.88	48.1	33	138	234	31.7	72	53	52	112	12.4	-13.5	59	167	225	98	29	0	199	477	162	668	78	0	62	3	361	1463	440	0	103	338	89
Wheeler_Creek_50	Wheeler_Creek	2	ID+WA	45.5	-114.17	1828.8	22.3	230	118	218	24.2	142	56	52	170	7.6	-9.9	66	175	243	113	184	0	162	407	117	554	105	0	102	0	147	993	263	0	46	289	44
Haden_Creek_48	Haden_Creek	2	ID+WA	48.27	-119.07	1127.76	37.3	123	83	154	23.2	95	58	52	115	7.6	-9	50	170	237	101	91	0	199	395	111	496	67	0	79	0	204	995	304	0	85	312	63
SFK_T_CR_41	SFK_Taylor_CR	2	MT+WY	45.15	-106.02	1127.76	45.4	43	130	221	28.7	79	53	51	129	11.5	-11.9	68	179	236	110	34	0	240	479	168	535	67	0	56	6	324	1400	429	0	111	349	88
CA_524_35	CA_524	2	CA	39.9595	-121.606	1066.8	13.8	798	37	127	17.3	404	59	52	411	12.5	0.7	72	197	274	141	25	92	285	505	222	50	10	0	4	165	529	1465	839	0	81	468	75
Wheeler_Creek_45	Wheeler_Creek	2	ID+WA	45.5	-114.17	1828.8	22.3	230	118	218	24.2	142	56	52	170	7.6	-9.9	66	175	243	113	184	0	162	407	117	554	105	0	102	0	147	993	263	0	46	289	44
Tonata_Creek_16	Tonata_Creek	2	ID+WA	48.54	-118.44	609.6	20.7	227	127	219	22.7	162	62	58	182	7.7	-9.3	52	165	233	95	183	0	146	353	98	560	99	0	110	0	141	893	263	0	37	227	30
Cap_Gap_26	Cap_Gap	2	AZ+NM	33.37	-105.28	2179.32	59.9	42	162	263	19.4	118	45	52	55	12.9	-4.8	99	224	250	143	2	149	392	541	282	78	9	0	6	130	690	1510	748	107	337	379	164
Northport_44	Northport	2	ID+WA	48.56	-117.48	396.24	14.3	373	156	282	22.4	258	60	53	232	6.7	-8.9	36	154	221	82	289	0	149	371	102	529	90	0	92	0	142	878	249	0	15	215	20
Sheridan_Wyoming_41	Sheridan_Wyoming	2	MT+WY	44.36	-107.06	2133.6	12.5	136	171	342	21.1	168	53	58	281	2.7	-15.1	89	204	257	133	130	0	73	304	93	849	370	2	230	0	20	420	67	0	0	133	0
Cap_Gap_23	Cap_Gap	2	AZ+NM	33.37	-105.28	2179.32	59.9	42	162	263	19.4	118	45	52	55	12.9	-4.8	99	224	250	143	2	149	392	541	282	78	9	0	6	130	690	1510	748	107	337	379	164
CA_321_31	CA_321	2	CA	41.8997	-122.864	1219.2	23.5	398	51	114	18.3	213	62	58	182	11.3	-1.4	100	200	269	161	42	66	235	423	169	108	26	0	12	59	302	1235	613	0	102	372	63
Dominion_30	Dominion	2	ID+WA	48.34	-117.47	1219.2	16.5	340	133	241	22.6	230	56	49	207	6.2	-9.2	58	171	239	111	252	0	200	401	113	499	77	0	86	0	170	928	272	0	39	268	33
Wheeler_Creek_29	Wheeler_Creek	2	ID+WA	45.5	-114.17	1828.8	22.3	230	118	218	24.2	142	56	52	170	7.6	-9.9	66	175	243	113	184	0	162	407	117	554	105	0	102	0	147	993	263	0	46	289	44
Cap_Gap_32	Cap_Gap	2	AZ+NM	33.37	-105.28	2179.32	59.9	42	162	263	19.4	118	45	52	55	12.9	-4.8	99	224	250	143	2	149	392	541	282	78	9	0	6	130	690	1510	748	107	337	379	164
UER_9	UER	2	AZ+NM	33.555	-109.193	1737.36	40.7	119	203	280	20.3	150	39	45	56	10.8	-6.6	105	228	243	151	11	146	391	574	292	103	14	0	8	93	540	1450	699	37	335	372	142
CA_301_19	CA_301	2	CA	41.7038	-123.569	1371.6	6.4	1444	110	305	17	857	60	54	772	10.7	-0.9	48	163	220	92	102	74	243	449	183	84	25	0	11	82	304	1248	639	0	0	340	27
Cherry_Road_42	Cherry_Road_	2	AZ+NM	34.586	-112.057	1591.97	49.8	116	142	206	20.8	118	48	52	78	13.4	-3.5	99	226	251	151	7	133	354	548	279	76	12	0	5	126	575	1568	821	17	276	406	161
Wheeler_Creek_11	Wheeler_Creek	2	ID+WA	45.5	-114.17	1828.8	22.3	230	118	218	24.2	142	56	52	170	7.6	-9.9	66	175	243	113	184	0	162	407	117	554	105	0	102	0	147	993	263	0	46	289	44
Hangman_s_Creek_21	Hangman’s_Creek	2	MT+WY	45.48	-109.41	1371.6	40.1	48	128	258	25.1	99	55	53	164	10.6	-9	64	169	227	105	27	0	231	447	160	369	60	0	36	9	299	1272	433	0	67	318	61
Haden_Creek_17	Haden_Creek	2	ID+WA	48.27	-119.07	1127.76	37.3	123	83	154	23.2	95	58	52	115	7.6	-9	50	170	237	101	91	0	199	395	111	496	67	0	79	0	204	995	304	0	85	312	63
CA_321_6	CA_321	2	CA	41.8997	-122.864	1219.2	23.5	398	51	114	18.3	213	62	58	182	11.3	-1.4	100	200	269	161	42	66	235	423	169	108	26	0	12	59	302	1235	613	0	102	372	63
CA_301_35	CA_301	2	CA	41.7038	-123.569	1371.6	6.4	1444	110	305	17	857	60	54	772	10.7	-0.9	48	163	220	92	102	74	243	449	183	84	25	0	11	82	304	1248	639	0	0	340	27
Cap_Gap_7	Cap_Gap	2	AZ+NM	33.37	-105.28	2179.32	59.9	42	162	263	19.4	118	45	52	55	12.9	-4.8	99	224	250	143	2	149	392	541	282	78	9	0	6	130	690	1510	748	107	337	379	164
Cherry_Road_34	Cherry_Road_	2	AZ+NM	34.586	-112.057	1591.97	49.8	116	142	206	20.8	118	48	52	78	13.4	-3.5	99	226	251	151	7	133	354	548	279	76	12	0	5	126	575	1568	821	17	276	406	161
Doran_Creek_37	Doran_Creek	2	ID+WA	45.55	-114	1828.8	29.7	178	99	178	24.6	107	55	50	126	7.6	-9.9	66	175	242	114	141	0	171	426	123	544	90	0	94	0	176	1037	282	0	82	327	70
CA_321_29	CA_321	2	CA	41.8997	-122.864	1219.2	23.5	398	51	114	18.3	213	62	58	182	11.3	-1.4	100	200	269	161	42	66	235	423	169	108	26	0	12	59	302	1235	613	0	102	372	63
SFK_Taylor_CR_17	SFK_Taylor_CR	2	MT+WY	45.15	-106.02	1127.76	45.4	43	130	221	28.7	79	53	51	129	11.5	-11.9	68	179	236	110	34	0	240	479	168	535	67	0	56	6	324	1400	429	0	111	349	88
Woodruff_Park_17	Woodruff_Park	2	MT+WY	46.23	-105.36	944.88	48.1	33	138	234	31.7	72	53	52	112	12.4	-13.5	59	167	225	98	29	0	199	477	162	668	78	0	62	3	361	1463	440	0	103	338	89
San_Fran_Peaks_35	San_Fran_Peaks	2	AZ+NM	35.33	-111.71	2743.2	15.3	268	196	295	20.1	189	44	51	225	4.3	-12.4	129	240	266	177	208	0	184	405	156	528	138	0	86	2	86	697	207	0	73	209	41
Sheridan_Wyoming_23	Sheridan_Wyoming	2	MT+WY	44.36	-107.06	2133.6	12.5	136	171	342	21.1	168	53	58	281	2.7	-15.1	89	204	257	133	130	0	73	304	93	849	370	2	230	0	20	420	67	0	0	133	0
Sheridan_Wyoming_45	Sheridan_Wyoming	2	MT+WY	44.36	-107.06	2133.6	12.5	136	171	342	21.1	168	53	58	281	2.7	-15.1	89	204	257	133	130	0	73	304	93	849	370	2	230	0	20	420	67	0	0	133	0
Northport_20	Northport	2	ID+WA	48.56	-117.48	396.24	14.3	373	156	282	22.4	258	60	53	232	6.7	-8.9	36	154	221	82	289	0	149	371	102	529	90	0	92	0	142	878	249	0	15	215	20
CA_752_27	CA_752	2	CA	41.1007	-120.196	2286	20.5	308	75	162	20.1	159	60	55	197	7.1	-7.1	101	218	287	164	172	0	154	392	152	363	111	0	58	0	99	885	300	0	44	317	56
Crystal_Springs_34	Crystal_Springs	2	MT+WY	44.5	-107.19	1828.8	12.9	145	150	313	21.7	181	53	58	269	3	-14.9	70	190	243	116	139	0	75	308	89	857	354	1	234	0	24	452	65	0	0	157	0
Doran_Creek_17	Doran_Creek	2	ID+WA	45.55	-114	1828.8	29.7	178	99	178	24.6	107	55	50	126	7.6	-9.9	66	175	242	114	141	0	171	426	123	544	90	0	94	0	176	1037	282	0	82	327	70
CA_752_19	CA_752	2	CA	41.1007	-120.196	2286	20.5	308	75	162	20.1	159	60	55	197	7.1	-7.1	101	218	287	164	172	0	154	392	152	363	111	0	58	0	99	885	300	0	44	317	56
Doran_Creek_9	Doran_Creek	2	ID+WA	45.55	-114	1828.8	29.7	178	99	178	24.6	107	55	50	126	7.6	-9.9	66	175	242	114	141	0	171	426	123	544	90	0	94	0	176	1037	282	0	82	327	70
Northport_34	Northport	2	ID+WA	48.56	-117.48	396.24	14.3	373	156	282	22.4	258	60	53	232	6.7	-8.9	36	154	221	82	289	0	149	371	102	529	90	0	92	0	142	878	249	0	15	215	20
Haden_Creek_24	Haden_Creek	2	ID+WA	48.27	-119.07	1127.76	37.3	123	83	154	23.2	95	58	52	115	7.6	-9	50	170	237	101	91	0	199	395	111	496	67	0	79	0	204	995	304	0	85	312	63
CA_752_24	CA_752	2	CA	41.1007	-120.196	2286	20.5	308	75	162	20.1	159	60	55	197	7.1	-7.1	101	218	287	164	172	0	154	392	152	363	111	0	58	0	99	885	300	0	44	317	56
UER_50	UER	2	AZ+NM	33.555	-109.193	1737.36	40.7	119	203	280	20.3	150	39	45	56	10.8	-6.6	105	228	243	151	11	146	391	574	292	103	14	0	8	93	540	1450	699	37	335	372	142
Cap_Gap_13	Cap_Gap	2	AZ+NM	33.37	-105.28	2179.32	59.9	42	162	263	19.4	118	45	52	55	12.9	-4.8	99	224	250	143	2	149	392	541	282	78	9	0	6	130	690	1510	748	107	337	379	164
Sheridan_Wyoming_19	Sheridan_Wyoming	2	MT+WY	44.36	-107.06	2133.6	12.5	136	171	342	21.1	168	53	58	281	2.7	-15.1	89	204	257	133	130	0	73	304	93	849	370	2	230	0	20	420	67	0	0	133	0
Northport_35	Northport	2	ID+WA	48.56	-117.48	396.24	14.3	373	156	282	22.4	258	60	53	232	6.7	-8.9	36	154	221	82	289	0	149	371	102	529	90	0	92	0	142	878	249	0	15	215	20
SFK_Taylor_CR_49	SFK_Taylor_CR	2	MT+WY	45.15	-106.02	1127.76	45.4	43	130	221	28.7	79	53	51	129	11.5	-11.9	68	179	236	110	34	0	240	479	168	535	67	0	56	6	324	1400	429	0	111	349	88
CA_301_23	CA_301	2	CA	41.7038	-123.569	1371.6	6.4	1444	110	305	17	857	60	54	772	10.7	-0.9	48	163	220	92	102	74	243	449	183	84	25	0	11	82	304	1248	639	0	0	340	27
CA_752_54	CA_752	2	CA	41.1007	-120.196	2286	20.5	308	75	162	20.1	159	60	55	197	7.1	-7.1	101	218	287	164	172	0	154	392	152	363	111	0	58	0	99	885	300	0	44	317	56
Crystal_Springs_25	Crystal_Springs	2	MT+WY	44.5	-107.19	1828.8	12.9	145	150	313	21.7	181	53	58	269	3	-14.9	70	190	243	116	139	0	75	308	89	857	354	1	234	0	24	452	65	0	0	157	0
Tonata_Creek_50	Tonata_Creek	2	ID+WA	48.54	-118.44	609.6	20.7	227	127	219	22.7	162	62	58	182	7.7	-9.3	52	165	233	95	183	0	146	353	98	560	99	0	110	0	141	893	263	0	37	227	30
Northport_37	Northport	2	ID+WA	48.56	-117.48	396.24	14.3	373	156	282	22.4	258	60	53	232	6.7	-8.9	36	154	221	82	289	0	149	371	102	529	90	0	92	0	142	878	249	0	15	215	20
Tonata_Creek_1	Tonata_Creek	2	ID+WA	48.54	-118.44	609.6	20.7	227	127	219	22.7	162	62	58	182	7.7	-9.3	52	165	233	95	183	0	146	353	98	560	99	0	110	0	141	893	263	0	37	227	30
Doran_35	Doran_Creek	2	ID+WA	45.55	-114	1828.8	29.7	178	99	178	24.6	107	55	50	126	7.6	-9.9	66	175	242	114	141	0	171	426	123	544	90	0	94	0	176	1037	282	0	82	327	70
UER_15	UER	2	AZ+NM	33.555	-109.193	1737.36	40.7	119	203	280	20.3	150	39	45	56	10.8	-6.6	105	228	243	151	11	146	391	574	292	103	14	0	8	93	540	1450	699	37	335	372	142
CA_321_21	CA_321	2	CA	41.8997	-122.864	1219.2	23.5	398	51	114	18.3	213	62	58	182	11.3	-1.4	100	200	269	161	42	66	235	423	169	108	26	0	12	59	302	1235	613	0	102	372	63
San_Fran_Peaks_21	San_Fran_Peaks	2	AZ+NM	35.33	-111.71	2743.2	15.3	268	196	295	20.1	189	44	51	225	4.3	-12.4	129	240	266	177	208	0	184	405	156	528	138	0	86	2	86	697	207	0	73	209	41
Cap_Gap_16	Cap_Gap	2	AZ+NM	33.37	-105.28	2179.32	59.9	42	162	263	19.4	118	45	52	55	12.9	-4.8	99	224	250	143	2	149	392	541	282	78	9	0	6	130	690	1510	748	107	337	379	164
Rock_Creek_29	Rock_Creek_	2	MT+WY	46.52	-109.31	1463.04	47.8	35	144	227	25.5	61	52	50	98	8.9	-11.1	65	173	229	107	26	0	185	437	152	500	88	0	60	2	240	1155	348	0	103	293	91
CA_993_24	CA_993	2	CA	34.2605	-117.639	1828.8	21.5	484	26	91	17.1	158	63	64	267	12.5	-1.7	87	223	266	156	38	107	254	419	210	87	29	0	8	90	312	1245	620	0	92	393	106
Green_s_Peak_44	Green_s_Peak	2	AZ+NM	34.126	-109.535	2804.16	19.7	185	237	322	19	178	44	49	133	4.6	-12.4	125	238	256	168	121	0	202	425	210	426	111	0	61	6	123	755	251	0	144	188	51
CA_301_15	CA_301	2	CA	41.7038	-123.569	1371.6	6.4	1444	110	305	17	857	60	54	772	10.7	-0.9	48	163	220	92	102	74	243	449	183	84	25	0	11	82	304	1248	639	0	0	340	27
Cap_Gap_38	Cap_Gap	2	AZ+NM	33.37	-105.28	2179.32	59.9	42	162	263	19.4	118	45	52	55	12.9	-4.8	99	224	250	143	2	149	392	541	282	78	9	0	6	130	690	1510	748	107	337	379	164
Wheeler_Creek_48	Wheeler_Creek	2	ID+WA	45.5	-114.17	1828.8	22.3	230	118	218	24.2	142	56	52	170	7.6	-9.9	66	175	243	113	184	0	162	407	117	554	105	0	102	0	147	993	263	0	46	289	44
Woodruff_Park_35	Woodruff_Park	2	MT+WY	46.23	-105.36	944.88	48.1	33	138	234	31.7	72	53	52	112	12.4	-13.5	59	167	225	98	29	0	199	477	162	668	78	0	62	3	361	1463	440	0	103	338	89
CA_524_7	CA_524	2	CA	39.9595	-121.606	1066.8	13.8	798	37	127	17.3	404	59	52	411	12.5	0.7	72	197	274	141	25	92	285	505	222	50	10	0	4	165	529	1465	839	0	81	468	75
CA_533_41	CA_533	2	CA	37.1263	-119.28	1676.4	22.6	438	25	76	16.5	176	58	55	256	10.6	-2.4	86	221	278	159	29	108	264	462	223	79	26	0	8	96	313	1228	627	0	90	437	121
CA_301_5	CA_301	2	CA	41.7038	-123.569	1371.6	6.4	1444	110	305	17	857	60	54	772	10.7	-0.9	48	163	220	92	102	74	243	449	183	84	25	0	11	82	304	1248	639	0	0	340	27
San_Fran_Peaks_17	San_Fran_Peaks	2	AZ+NM	35.33	-111.71	2743.2	15.3	268	196	295	20.1	189	44	51	225	4.3	-12.4	129	240	266	177	208	0	184	405	156	528	138	0	86	2	86	697	207	0	73	209	41
SFK_Taylor_CR_19	SFK_Taylor_CR	2	MT+WY	45.15	-106.02	1127.76	45.4	43	130	221	28.7	79	53	51	129	11.5	-11.9	68	179	236	110	34	0	240	479	168	535	67	0	56	6	324	1400	429	0	111	349	88
Haden_Creek_45	Haden_Creek	2	ID+WA	48.27	-119.07	1127.76	37.3	123	83	154	23.2	95	58	52	115	7.6	-9	50	170	237	101	91	0	199	395	111	496	67	0	79	0	204	995	304	0	85	312	63
CA_752_32	CA_752	2	CA	41.1007	-120.196	2286	20.5	308	75	162	20.1	159	60	55	197	7.1	-7.1	101	218	287	164	172	0	154	392	152	363	111	0	58	0	99	885	300	0	44	317	56
Mount_Taylor_43	Mount_Taylor	2	AZ+NM	35.06	-108.08	2438.4	47.8	68	138	194	21.7	87	43	47	61	7.6	-10.7	128	237	263	174	35	0	299	490	233	337	56	0	37	19	255	1085	388	0	237	352	146
CA_321_54	CA_321	2	CA	41.8997	-122.864	1219.2	23.5	398	51	114	18.3	213	62	58	182	11.3	-1.4	100	200	269	161	42	66	235	423	169	108	26	0	12	59	302	1235	613	0	102	372	63
Shorthand Column name	Actual variable name
AHM	annual heat-moisture index
PPT_wt	Winter Precipitation
PPT_sm	Summer Preicpitation
MSP	mean annual summer (May to Sept.) precipitation (mm)
TD	Continentality
PPT_at	Fall Precipitation
RH_sp	Relative Humidty Spring
RH_sm	Summer Relative Humitidy
PPT_sp	Spring Precipitation
Tmin_sm	Min Temperature Summer
Tmin_wt	Min Temperature Winter
Rad_wt_pipo_extent	Solar Radiation winter
Rad_sp_Pipo_extent	Solar Radiation spring
Rad_sm_pipo_extent	Solar Radiaiton summer
Rad_at_pipo_extnet	Solar Ratiatino fall
PAS_wt	Precipitaiton as Snow winter
Eref_wt_pipio_extnt	Hargreaves reference evaporation winter
Eref_sp_pipo	Hargreaves reference evaporation spring
Eref_sm_pipo_extnet	Hargreaves reference evaporation summer
Eref_at_pipo_extent	Hargreaves reference evaporation autumn
DD_0_wt_pio_extent	Degree days below zero winter
DD_0_sp_pipo	Degree days below zero spring
DD_0_sm_pipo_extent	degree days below zero summer
DD_0_at_pipo	degree days below zero autumn
DD5_wt_pipo	degree days grearer than 5C winter
DD5_sp_pipo_extent	Degree days greater than 5C spring
DD5_sm_pipo	degree days greater than 5C summer
DD5_at_pipo_	Degree days greater than 5C autumn
CMD_wt_pipo	Hargreaves climatic moisture deficit winter
CMD_sp_pipo	Hargreaves climatic moisture deficit spring
CMD_sm_pipo	Hargreaves climatic moisture deficit summer
CMD_at_pipo	Hargreaves climatic moisture deficit autumn

## Sheet: Table S3
Supporting Information S3. Pairwise FST matrix for Dataset 1. Wright’s Pairwise FST was used to calculate pairwise differences. Collection locations name are shown in the first x and y column then pairwise FST distances are shown in corresponding matrix cells
	P5S_CP	UT	AZ_Cherry	CO_WRFO83	AZ_FUTS	CO_UP	SD_BHNF	NM_SFE	P4_CP	ID	P1S_CP	CA_SN_North	CA_HR	WA_MV	CA_SN_South	OR_OCH	WA	CA_SN_Middle	CO_STR	NM_Sandia	OR_Des	P3_CP	CO_KK	AZ_SNBL	NE_NF	SD_BHEF
P5S_CP	NA	NA	NA	NA	NA	NA	NA	NA	NA	NA	NA	NA	NA	NA	NA	NA	NA	NA	NA	NA	NA	NA	NA	NA	NA	NA
UT	0.00816526	NA	NA	NA	NA	NA	NA	NA	NA	NA	NA	NA	NA	NA	NA	NA	NA	NA	NA	NA	NA	NA	NA	NA	NA	NA
AZ_Cherry	0.0124263	0.0105858	NA	NA	NA	NA	NA	NA	NA	NA	NA	NA	NA	NA	NA	NA	NA	NA	NA	NA	NA	NA	NA	NA	NA	NA
CO_WRFO83	0.0157502	0.00825487	0.0189735	NA	NA	NA	NA	NA	NA	NA	NA	NA	NA	NA	NA	NA	NA	NA	NA	NA	NA	NA	NA	NA	NA	NA
AZ_FUTS	0.0185131	0.011055	0.00461663	0.0221657	NA	NA	NA	NA	NA	NA	NA	NA	NA	NA	NA	NA	NA	NA	NA	NA	NA	NA	NA	NA	NA	NA
CO_UP	0.0108058	0.00178232	0.011401	0.0122723	0.0145523	NA	NA	NA	NA	NA	NA	NA	NA	NA	NA	NA	NA	NA	NA	NA	NA	NA	NA	NA	NA	NA
SD_BHNF	0.0268265	0.012171	0.0170862	0.0275129	0.0144031	0.0198361	NA	NA	NA	NA	NA	NA	NA	NA	NA	NA	NA	NA	NA	NA	NA	NA	NA	NA	NA	NA
NM_SFE	0.00832788	0.00698597	0.0056364	0.0144895	0.00635165	0.00433931	0.0132581	NA	NA	NA	NA	NA	NA	NA	NA	NA	NA	NA	NA	NA	NA	NA	NA	NA	NA	NA
P4_CP	0.0348465	0.0192195	0.0224766	0.039042	0.0177122	0.0319219	0.0304587	0.0243384	NA	NA	NA	NA	NA	NA	NA	NA	NA	NA	NA	NA	NA	NA	NA	NA	NA	NA
ID	0.130474	0.139008	0.146728	0.126288	0.145775	0.124721	0.131554	0.141055	0.148964	NA	NA	NA	NA	NA	NA	NA	NA	NA	NA	NA	NA	NA	NA	NA	NA	NA
P1S_CP	0.0284487	0.0133269	0.0149305	0.0309455	0.00908066	0.0232338	0.02176	0.0163855	0.0185723	0.143287	NA	NA	NA	NA	NA	NA	NA	NA	NA	NA	NA	NA	NA	NA	NA	NA
CA_SN_North	0.154139	0.159795	0.168843	0.149945	0.166495	0.147475	0.152106	0.163289	0.167968	0.0322364	0.161704	NA	NA	NA	NA	NA	NA	NA	NA	NA	NA	NA	NA	NA	NA	NA
CA_HR	0.157953	0.152599	0.163539	0.15557	0.161749	0.153843	0.160925	0.15965	0.172189	0.0331584	0.164272	0.0177582	NA	NA	NA	NA	NA	NA	NA	NA	NA	NA	NA	NA	NA	NA
WA_MV	0.132096	0.140836	0.149392	0.12816	0.148835	0.126095	0.134646	0.143133	0.15197	0.00397049	0.146392	0.0234601	0.0243893	NA	NA	NA	NA	NA	NA	NA	NA	NA	NA	NA	NA	NA
CA_SN_South	0.156413	0.156408	0.167367	0.150899	0.164049	0.146922	0.153619	0.162758	0.171936	0.0305145	0.162845	0.0023636	0.015891	0.020638	NA	NA	NA	NA	NA	NA	NA	NA	NA	NA	NA	NA
OR_OCH	0.123608	0.133281	0.141349	0.119997	0.141548	0.118751	0.128124	0.135237	0.146775	0.00422153	0.140748	0.0380014	0.034338	0.0081947	0.0328415	NA	NA	NA	NA	NA	NA	NA	NA	NA	NA	NA
WA	0.174766	0.171807	0.181423	0.169581	0.176602	0.167351	0.168774	0.177735	0.182571	0.0288782	0.174715	0.0279413	0.0442097	0.0241473	0.0337767	0.036601	NA	NA	NA	NA	NA	NA	NA	NA	NA	NA
CA_SN_Middle	0.167707	0.169799	0.179403	0.162138	0.17467	0.159018	0.161375	0.174704	0.177912	0.0364576	0.169879	0.000680445	0.0237975	0.0273417	0.00361481	0.0424644	0.0321142	NA	NA	NA	NA	NA	NA	NA	NA	NA
CO_STR	0.0237313	0.0100701	0.00886825	0.0257382	0.00393702	0.018596	0.0161238	0.0115674	0.0190069	0.141175	0.010102	0.160635	0.162133	0.144652	0.160585	0.138558	0.172926	0.168239	NA	NA	NA	NA	NA	NA	NA	NA
NM_Sandia	0.0099966	0.00664747	0.00462051	0.0145566	0.00335986	0.00645337	0.00990416	0.00060652	0.0192006	0.140112	0.0112016	0.161442	0.157512	0.142613	0.159673	0.134974	0.173684	0.170865	0.00641779	NA	NA	NA	NA	NA	NA	NA
OR_Des	0.127221	0.130052	0.138994	0.123783	0.13873	0.122074	0.131477	0.134018	0.150296	0.00871635	0.142466	0.0459609	0.0434617	0.0119709	0.0416148	0.00165124	0.0486267	0.0536386	0.139108	0.133424	NA	NA	NA	NA	NA	NA
P3_CP	0.0109326	0.00986076	0.0163584	0.0170042	0.0211159	0.0102614	0.0277729	0.0117513	0.0366223	0.132949	0.0254717	0.155233	0.158278	0.134476	0.157658	0.126099	0.174858	0.168045	0.0248088	0.0132549	0.128696	NA	NA	NA	NA	NA
CO_KK	0.00897852	0.0134002	0.02139	0.017168	0.02841	0.0103231	0.0382962	0.0155295	0.0487938	0.129625	0.0412572	0.154376	0.15643	0.130489	0.156882	0.120862	0.176175	0.170822	0.0357498	0.0191703	0.124476	0.0145066	NA	NA	NA	NA
AZ_SNBL	0.0202413	0.00941112	0.00663798	0.0220936	0.00141689	0.0152229	0.0139126	0.00875304	0.0157817	0.145062	0.00795127	0.165019	0.160093	0.147865	0.162029	0.14107	0.174357	0.172803	0.00352311	0.0042561	0.138653	0.0216909	0.0301638	NA	NA	NA
NE_NF	0.0079627	0.00315261	0.0148421	0.0114048	0.0221006	0.00670281	0.00945158	0.00351825	0.0444313	0.109599	0.0333649	0.132376	0.140656	0.109144	0.122458	0.0991022	0.155203	0.142061	0.0264506	0.00762964	0.0989402	0.00911104	0.0131043	0.0235401	NA	NA
SD_BHEF	0.0180294	0.0102261	0.0214817	0.0202786	0.0249932	0.014966	0.00921026	0.0139879	0.0394328	0.131527	0.0315505	0.154316	0.158916	0.133043	0.158161	0.125119	0.173407	0.167466	0.0277308	0.0147016	0.12968	0.0196809	0.0207524	0.0238736	-0.00187557	NA

## Sheet: Table S4
Supporting Information Table S4. Pairwise FST matrix for Dataset 2. Wright’s Pairwise FST was used to calculate pairwise differences Seed source name are shown in the first x and y column then pairwise FST distances are shown in corresponding matrix cells
	Doran_Creek	Hangman’s_Creek	CA_301	Haden_Creek	UER	SFK_Taylor_CR	CA_321	CA_524	Wheeler_Creek	Northport	Crystal_Springs	Green_s_Peak	Cap_Gap	CA_752	Sheridan_Wyoming	CA_533	Dominion	Cherry_Road_	Rock_Creek_	CA_993	San_Fran_Peaks	Woodruff_Park	Mount_Taylor	Tonata_Creek
Doran_Creek	NA	NA	NA	NA	NA	NA	NA	NA	NA	NA	NA	NA	NA	NA	NA	NA	NA	NA	NA	NA	NA	NA	NA	NA
Hangman’s_Creek	0.133934	NA	NA	NA	NA	NA	NA	NA	NA	NA	NA	NA	NA	NA	NA	NA	NA	NA	NA	NA	NA	NA	NA	NA
CA_301	0.0382353	0.140906	NA	NA	NA	NA	NA	NA	NA	NA	NA	NA	NA	NA	NA	NA	NA	NA	NA	NA	NA	NA	NA	NA
Haden_Creek	0.0198839	0.138165	0.0461345	NA	NA	NA	NA	NA	NA	NA	NA	NA	NA	NA	NA	NA	NA	NA	NA	NA	NA	NA	NA	NA
UER	0.14659	0.0437852	0.152346	0.151155	NA	NA	NA	NA	NA	NA	NA	NA	NA	NA	NA	NA	NA	NA	NA	NA	NA	NA	NA	NA
SFK_Taylor_CR	0.169212	0.0171441	0.178348	0.17283	0.0434659	NA	NA	NA	NA	NA	NA	NA	NA	NA	NA	NA	NA	NA	NA	NA	NA	NA	NA	NA
CA_321	0.0361628	0.138644	0.00536184	0.043326	0.151489	0.17773	NA	NA	NA	NA	NA	NA	NA	NA	NA	NA	NA	NA	NA	NA	NA	NA	NA	NA
CA_524	0.0503568	0.150439	0.0087773	0.0582943	0.157808	0.185202	0.00803777	NA	NA	NA	NA	NA	NA	NA	NA	NA	NA	NA	NA	NA	NA	NA	NA	NA
Wheeler_Creek	0.0117986	0.129637	0.0326257	0.0162148	0.14133	0.164079	0.0308207	0.0443585	NA	NA	NA	NA	NA	NA	NA	NA	NA	NA	NA	NA	NA	NA	NA	NA
Northport	0.0142646	0.130881	0.0329519	0.0126134	0.143801	0.166101	0.0302602	0.0443913	0.00988366	NA	NA	NA	NA	NA	NA	NA	NA	NA	NA	NA	NA	NA	NA	NA
Crystal_Springs	0.164293	0.0210164	0.171282	0.16808	0.0466482	0.0169942	0.170544	0.178089	0.159088	0.160779	NA	NA	NA	NA	NA	NA	NA	NA	NA	NA	NA	NA	NA	NA
Green_s_Peak	0.168294	0.0328506	0.17811	0.172328	0.0359279	0.025092	0.177882	0.185005	0.162756	0.165243	0.0290552	NA	NA	NA	NA	NA	NA	NA	NA	NA	NA	NA	NA	NA
Cap_Gap	0.17501	0.03555	0.185438	0.179218	0.03671	0.0253645	0.185455	0.191936	0.169525	0.172122	0.0308554	0.00757505	NA	NA	NA	NA	NA	NA	NA	NA	NA	NA	NA	NA
CA_752	0.024839	0.140585	0.0563716	0.02779	0.152861	0.172983	0.0541083	0.0697988	0.0211592	0.0249259	0.168336	0.172864	0.178942	NA	NA	NA	NA	NA	NA	NA	NA	NA	NA	NA
Sheridan_Wyoming	0.163584	0.0226339	0.171358	0.167242	0.0480657	0.0196602	0.170753	0.178635	0.158886	0.16054	0.0115816	0.0311985	0.0325697	0.167772	NA	NA	NA	NA	NA	NA	NA	NA	NA	NA
CA_533	0.0591132	0.1575	0.0141144	0.0677693	0.164054	0.191859	0.012491	0.006343	0.0530627	0.0532341	0.184839	0.192262	0.198855	0.0802725	0.185105	NA	NA	NA	NA	NA	NA	NA	NA	NA
Dominion	0.0147169	0.130588	0.0321439	0.0138602	0.144539	0.167169	0.0293909	0.0435315	0.0107699	0.00575842	0.162221	0.166677	0.173837	0.0253015	0.161826	0.0519745	NA	NA	NA	NA	NA	NA	NA	NA
Cherry_Road_	0.184253	0.0497262	0.193862	0.188111	0.0460221	0.0379235	0.19384	0.200512	0.178449	0.18104	0.0445876	0.0247068	0.0237335	0.188177	0.0451153	0.207551	0.182367	NA	NA	NA	NA	NA	NA	NA
Rock_Creek_	0.128607	0.0203572	0.140012	0.132195	0.0501324	0.0266625	0.138726	0.148736	0.124466	0.125711	0.0269999	0.039712	0.0425326	0.134157	0.0292294	0.156207	0.126504	0.0562431	NA	NA	NA	NA	NA	NA
CA_993	0.065894	0.163287	0.0225253	0.0738312	0.168372	0.195919	0.0212805	0.0165341	0.0592981	0.059366	0.1888	0.196572	0.202784	0.0863684	0.189091	0.0177256	0.0581818	0.212258	0.160898	NA	NA	NA	NA	NA
San_Fran_Peaks	0.183731	0.0450966	0.193361	0.187393	0.0457837	0.0359364	0.192816	0.200044	0.178201	0.180727	0.0424912	0.0190664	0.0198245	0.187714	0.0435717	0.206877	0.181766	0.0324649	0.0538896	0.21137	NA	NA	NA	NA
Woodruff_Park	0.167708	0.0166121	0.176456	0.171527	0.0419548	0.00926448	0.176042	0.183451	0.162255	0.164507	0.0144909	0.0231466	0.0240593	0.171503	0.0179786	0.190193	0.165474	0.0375809	0.0246717	0.194406	0.0356204	NA	NA	NA
Mount_Taylor	0.162681	0.0241585	0.171262	0.166867	0.0309634	0.0196925	0.170215	0.179514	0.157328	0.15913	0.0236427	0.00441505	0.00617718	0.168602	0.0249073	0.186969	0.159862	0.0222246	0.0329209	0.192596	0.0173678	0.0186011	NA	NA
Tonata_Creek	0.0198974	0.137164	0.0424342	0.0166414	0.149389	0.171521	0.0401603	0.0544353	0.0152176	0.0111677	0.16678	0.171394	0.178195	0.0289683	0.166288	0.0637437	0.0116186	0.187058	0.131272	0.0698761	0.186258	0.17006	0.165804	NA

## Sheet: Table S5
	Supporting Information Table S5. Eggnog ortholog results for GEA candidate loci in both datasets. Explanations for each column are shown in Sheet Named Table S5 Variable Names
	query	seed_ortholog	evalue	score	eggNOG_OGs	max_annot_lvl	COG_category	Description	Preferred_name	GOs	EC	KEGG_ko	KEGG_Pathway	KEGG_Module	KEGG_Reaction	KEGG_rclass	BRITE	KEGG_TC	CAZy	BiGG_Reaction	PFAMs	Dataset
1	C3873953:1112-2113_0	4432.XP_010261110.1	4.36e-114	348	COG2124@1|root,KOG0156@2759|Eukaryota,37HWJ@33090|Viridiplantae,3GBZ0@35493|Streptophyta	35493|Streptophyta	Q	cytochrome P450	-	GO:0003674,GO:0003824,GO:0004497,GO:0005575,GO:0008150,GO:0008152,GO:0009058,GO:0016020,GO:0016491,GO:0016705,GO:0016709,GO:0019748,GO:0022603,GO:0040034,GO:0044550,GO:0050789,GO:0050793,GO:0055114,GO:0065007,GO:0090709,GO:1905428	-	ko:K20619	-	-	-	-	ko00000,ko00199	-	-	-	p450	2
2	C3873953:378-1010_0	42345.XP_008811218.1	1.7e-102	313	COG2124@1|root,KOG0156@2759|Eukaryota,37HWJ@33090|Viridiplantae,3GBZ0@35493|Streptophyta,3KQY1@4447|Liliopsida	35493|Streptophyta	Q	cytochrome P-450	-	GO:0003674,GO:0003824,GO:0004497,GO:0005575,GO:0008150,GO:0008152,GO:0009058,GO:0016020,GO:0016491,GO:0016705,GO:0016709,GO:0019748,GO:0022603,GO:0040034,GO:0044550,GO:0050789,GO:0050793,GO:0055114,GO:0065007,GO:0090709,GO:1905428	-	ko:K20619	-	-	-	-	ko00000,ko00199	-	-	-	p450	2
3	C4343851:9108-11414_0	4432.XP_010273831.1	7.47e-309	870	COG1404@1|root,2QTK5@2759|Eukaryota,37J5A@33090|Viridiplantae,3GB2M@35493|Streptophyta	35493|Streptophyta	O	Subtilisin-like protease	-	-	-	-	-	-	-	-	-	-	-	-	Inhibitor_I9,PA,Peptidase_S8	2
4	C4666801:8091-8441_0	981085.XP_010090321.1	3.1e-49	171	28JI0@1|root,2QRX8@2759|Eukaryota,37RUF@33090|Viridiplantae,3GF60@35493|Streptophyta,4JMM2@91835|fabids	35493|Streptophyta	S	Nodulin-like	-	-	-	-	-	-	-	-	-	-	-	-	Nodulin-like	2
5	C4666801:8525-9471_0	3983.cassava4.1_033319m	1.33e-88	282	28JI0@1|root,2QRX8@2759|Eukaryota,37RUF@33090|Viridiplantae,3GF60@35493|Streptophyta,4JMM2@91835|fabids	35493|Streptophyta	S	Nodulin-like	-	-	-	-	-	-	-	-	-	-	-	-	Nodulin-like	2
6	C4666801:9573-10092_0	3760.EMJ00974	1.79e-59	201	28JI0@1|root,2QRX8@2759|Eukaryota,37RUF@33090|Viridiplantae,3GF60@35493|Streptophyta,4JMM2@91835|fabids	35493|Streptophyta	S	Nodulin-like	-	-	-	-	-	-	-	-	-	-	-	-	Nodulin-like	2
7	C4668917:7533-10325_0	88036.EFJ38477	4.03999999999983e-311	928	28MWR@1|root,2QUF5@2759|Eukaryota	2759|Eukaryota	-	-	-	-	-	ko:K20478	-	-	-	-	ko00000,ko04131	-	-	-	RHD3,VWA,VWA_2,zf-RING_2	2
8	C4693719:5273-5546_0	3750.XP_008360910.1	3.74e-30	116	2CM9J@1|root,2QPPQ@2759|Eukaryota,37T7F@33090|Viridiplantae,3GGJ2@35493|Streptophyta,4JMGU@91835|fabids	35493|Streptophyta	L	EXOIII	-	GO:0003674,GO:0003824,GO:0004518,GO:0004527,GO:0005575,GO:0005618,GO:0005622,GO:0005623,GO:0005737,GO:0005829,GO:0005886,GO:0006139,GO:0006725,GO:0006807,GO:0006950,GO:0006974,GO:0008150,GO:0008152,GO:0008408,GO:0009380,GO:0009987,GO:0016020,GO:0016787,GO:0016788,GO:0030312,GO:0032991,GO:0033554,GO:0034641,GO:0043170,GO:0044237,GO:0044238,GO:0044424,GO:0044444,GO:0044464,GO:0046483,GO:0050896,GO:…	-	-	-	-	-	-	-	-	-	-	RNase_T	2
9	C4693719:5737-5894_0	2711.XP_006494411.1	4.42e-24	95.1	2CM9J@1|root,2QPPQ@2759|Eukaryota,37T7F@33090|Viridiplantae,3GGJ2@35493|Streptophyta	35493|Streptophyta	L	exonuclease	-	GO:0003674,GO:0003824,GO:0004518,GO:0004527,GO:0005575,GO:0005618,GO:0005622,GO:0005623,GO:0005737,GO:0005829,GO:0005886,GO:0006139,GO:0006725,GO:0006807,GO:0006950,GO:0006974,GO:0008150,GO:0008152,GO:0008408,GO:0009380,GO:0009987,GO:0016020,GO:0016787,GO:0016788,GO:0030312,GO:0032991,GO:0033554,GO:0034641,GO:0043170,GO:0044237,GO:0044238,GO:0044424,GO:0044444,GO:0044464,GO:0046483,GO:0050896,GO:…	-	-	-	-	-	-	-	-	-	-	RNase_T	2
10	C4693719:7583-8489_0	3847.GLYMA05G00890.1	8.4e-17	88.6	2CM9J@1|root,2QPPQ@2759|Eukaryota,37T7F@33090|Viridiplantae,3GGJ2@35493|Streptophyta,4JMGU@91835|fabids	35493|Streptophyta	L	EXOIII	-	GO:0003674,GO:0003824,GO:0004518,GO:0004527,GO:0005575,GO:0005618,GO:0005622,GO:0005623,GO:0005737,GO:0005829,GO:0005886,GO:0006139,GO:0006725,GO:0006807,GO:0006950,GO:0006974,GO:0008150,GO:0008152,GO:0008408,GO:0009380,GO:0009987,GO:0016020,GO:0016787,GO:0016788,GO:0030312,GO:0032991,GO:0033554,GO:0034641,GO:0043170,GO:0044237,GO:0044238,GO:0044424,GO:0044444,GO:0044464,GO:0046483,GO:0050896,GO:…	-	-	-	-	-	-	-	-	-	-	RNase_T	2
11	C4693719:8672-8903_0	4513.MLOC_17627.1	1.5e-16	79.3	2CM9J@1|root,2QPPQ@2759|Eukaryota,37T7F@33090|Viridiplantae,3GGJ2@35493|Streptophyta,3KUVC@4447|Liliopsida,3IDI9@38820|Poales	35493|Streptophyta	L	Exonuclease	-	GO:0003674,GO:0003824,GO:0004518,GO:0004527,GO:0005575,GO:0005618,GO:0005622,GO:0005623,GO:0005737,GO:0005829,GO:0005886,GO:0006139,GO:0006725,GO:0006807,GO:0006950,GO:0006974,GO:0008150,GO:0008152,GO:0008408,GO:0009380,GO:0009987,GO:0016020,GO:0016787,GO:0016788,GO:0030312,GO:0032991,GO:0033554,GO:0034641,GO:0043170,GO:0044237,GO:0044238,GO:0044424,GO:0044444,GO:0044464,GO:0046483,GO:0050896,GO:…	-	-	-	-	-	-	-	-	-	-	RNase_T	2
12	C4699949:11496-12022_0	71139.XP_010050897.1	3.05e-30	123	2EA5Z@1|root,2SGF6@2759|Eukaryota	71139.XP_010050897.1|-	S	TIR domain	-	-	-	-	-	-	-	-	-	-	-	-	-	2
13	C4699949:12797-13952_0	4432.XP_010255714.1	8.13e-89	300	2EF04@1|root,2SK9Z@2759|Eukaryota,37Z2C@33090|Viridiplantae,3GNBV@35493|Streptophyta	35493|Streptophyta	S	TIR domain	-	-	-	-	-	-	-	-	-	-	-	-	LRR_1,NB-ARC,TIR	2
14	C4699949:13617-13952_0	3760.EMJ14349	7.51e-22	95.5	COG4886@1|root,2R41B@2759|Eukaryota,37TDP@33090|Viridiplantae,3GCY2@35493|Streptophyta	35493|Streptophyta	S	TMV resistance protein N-like	-	-	-	-	-	-	-	-	-	-	-	-	LRR_3,LRR_8,NB-ARC,TIR	2
15	C4714345:3681-4007_0	13333.ERN10853	3.01e-49	159	28NJK@1|root,2QV58@2759|Eukaryota,37S6X@33090|Viridiplantae,3GABC@35493|Streptophyta	35493|Streptophyta	G	Endoglucanase	-	-	3.2.1.4	ko:K01179	ko00500,ko01100,map00500,map01100	-	R06200,R11307,R11308	-	ko00000,ko00001,ko01000	-	GH5,GH9	-	Glyco_hydro_9	2
16	C4714345:4592-4753_0	4006.Lus10035475	1.25e-18	82	28NJK@1|root,2QV58@2759|Eukaryota,37S6X@33090|Viridiplantae,3GABC@35493|Streptophyta,4JDKR@91835|fabids	4006.Lus10035475|-	G	Endoglucanase	-	-	-	-	-	-	-	-	-	-	-	-	-	2
17	C4714345:5803-6003_0	13333.ERN10856	9.86e-23	93.6	28NJK@1|root,2QV58@2759|Eukaryota,37S6X@33090|Viridiplantae,3GABC@35493|Streptophyta	35493|Streptophyta	G	Endoglucanase	-	-	3.2.1.4	ko:K01179	ko00500,ko01100,map00500,map01100	-	R06200,R11307,R11308	-	ko00000,ko00001,ko01000	-	GH5,GH9	-	Glyco_hydro_9	2
18	C4714345:6086-6292_0	4565.Traes_1DL_6655FDC74.1	1.87e-25	101	2CM77@1|root,2QPI6@2759|Eukaryota,37P55@33090|Viridiplantae,3G86B@35493|Streptophyta,3KR0P@4447|Liliopsida,3I64Z@38820|Poales	35493|Streptophyta	G	Glycosyl hydrolase family 9	-	GO:0003674,GO:0003824,GO:0004553,GO:0007275,GO:0007389,GO:0008150,GO:0008810,GO:0009605,GO:0009607,GO:0009624,GO:0016787,GO:0016798,GO:0032501,GO:0032502,GO:0043207,GO:0048856,GO:0050896,GO:0051704,GO:0051707	-	-	-	-	-	-	-	-	-	-	Glyco_hydro_9	2
19	C4714345:6406-6639_0	4565.Traes_1BL_65000B245.1	2.88e-13	67	2CM77@1|root,2QPI6@2759|Eukaryota,37P55@33090|Viridiplantae,3G86B@35493|Streptophyta,3KR0P@4447|Liliopsida,3I64Z@38820|Poales	35493|Streptophyta	G	Glycosyl hydrolase family 9	-	GO:0003674,GO:0003824,GO:0004553,GO:0007275,GO:0007389,GO:0008150,GO:0008810,GO:0009605,GO:0009607,GO:0009624,GO:0016787,GO:0016798,GO:0032501,GO:0032502,GO:0043207,GO:0048856,GO:0050896,GO:0051704,GO:0051707	-	-	-	-	-	-	-	-	-	-	Glyco_hydro_9	2
20	C4755293:24297-25167_0	29730.Gorai.001G253200.1	9.66e-106	325	KOG0252@1|root,KOG0252@2759|Eukaryota,37I5U@33090|Viridiplantae,3GERK@35493|Streptophyta	35493|Streptophyta	P	Inorganic phosphate transporter	-	GO:0001101,GO:0003674,GO:0005215,GO:0005315,GO:0005575,GO:0005622,GO:0005623,GO:0005634,GO:0005737,GO:0005773,GO:0005794,GO:0005886,GO:0005887,GO:0005911,GO:0006810,GO:0006811,GO:0006820,GO:0008150,GO:0008509,GO:0009506,GO:0009719,GO:0009725,GO:0009737,GO:0010033,GO:0012505,GO:0015075,GO:0015291,GO:0015318,GO:0016020,GO:0016021,GO:0022804,GO:0022857,GO:0030054,GO:0031224,GO:0031226,GO:0033993,GO:…	-	ko:K08176	-	-	-	-	ko00000,ko02000	2.A.1.9	-	-	Sugar_tr	2
21	C4770705:24878-25350_0	2711.XP_006495109.1	9.1e-31	118	COG4886@1|root,2R41B@2759|Eukaryota,37TDP@33090|Viridiplantae,3GCY2@35493|Streptophyta	35493|Streptophyta	S	TMV resistance protein N-like	-	-	-	-	-	-	-	-	-	-	-	-	LRR_3,NB-ARC,TIR	2
22	C4800733:17727-18059_0	4641.GSMUA_Achr4P19070_001	2.17e-24	102	KOG1865@1|root,KOG1865@2759|Eukaryota,37N12@33090|Viridiplantae,3G7QS@35493|Streptophyta,3KPCS@4447|Liliopsida	35493|Streptophyta	O	Belongs to the peptidase C19 family	-	-	3.4.19.12	ko:K11855	-	-	-	-	ko00000,ko01000,ko01002,ko04121	-	-	-	UCH	2
23	C4800733:18149-18432_0	4641.GSMUA_Achr4P19070_001	2.31e-22	95.9	KOG1865@1|root,KOG1865@2759|Eukaryota,37N12@33090|Viridiplantae,3G7QS@35493|Streptophyta,3KPCS@4447|Liliopsida	35493|Streptophyta	O	Belongs to the peptidase C19 family	-	-	3.4.19.12	ko:K11855	-	-	-	-	ko00000,ko01000,ko01002,ko04121	-	-	-	UCH	2
24	C4851911:17891-21010_0	29730.Gorai.005G192500.1	4.07e-106	354	KOG4197@1|root,KOG4197@2759|Eukaryota,37ID7@33090|Viridiplantae,3G8VU@35493|Streptophyta	35493|Streptophyta	G	Pentatricopeptide repeat-containing protein	-	GO:0000959,GO:0003674,GO:0003676,GO:0003723,GO:0003824,GO:0004518,GO:0004519,GO:0005488,GO:0005575,GO:0005622,GO:0005623,GO:0005737,GO:0005739,GO:0006139,GO:0006725,GO:0006807,GO:0007154,GO:0007165,GO:0008150,GO:0008152,GO:0009451,GO:0009743,GO:0009756,GO:0009987,GO:0010033,GO:0010182,GO:0016070,GO:0016071,GO:0016556,GO:0016787,GO:0016788,GO:0023052,GO:0034641,GO:0042221,GO:0043170,GO:0043226,GO:…	-	-	-	-	-	-	-	-	-	-	DYW_deaminase,PPR	2
25	C4851911:17891-21010_1	3712.Bo3g087150.1	4.18e-18	98.6	KOG4197@1|root,KOG4197@2759|Eukaryota,37ID7@33090|Viridiplantae,3G8VU@35493|Streptophyta,3HQBD@3699|Brassicales	35493|Streptophyta	S	repeat-containing protein	-	GO:0000959,GO:0003674,GO:0003676,GO:0003723,GO:0003824,GO:0004518,GO:0004519,GO:0005488,GO:0005575,GO:0005622,GO:0005623,GO:0005737,GO:0005739,GO:0006139,GO:0006725,GO:0006807,GO:0007154,GO:0007165,GO:0008150,GO:0008152,GO:0009451,GO:0009743,GO:0009756,GO:0009987,GO:0010033,GO:0010182,GO:0016070,GO:0016071,GO:0016556,GO:0016787,GO:0016788,GO:0023052,GO:0034641,GO:0042221,GO:0043170,GO:0043226,GO:…	-	-	-	-	-	-	-	-	-	-	DYW_deaminase,PPR	2
26	C4869935:22224-22425_0	90675.XP_010499652.1	7.03e-15	73.9	28MYI@1|root,2QUH6@2759|Eukaryota,37K4B@33090|Viridiplantae,3GCM8@35493|Streptophyta,3HWPG@3699|Brassicales	35493|Streptophyta	K	Transcription factor	-	GO:0003674,GO:0003700,GO:0005975,GO:0005984,GO:0005991,GO:0005992,GO:0006082,GO:0006355,GO:0006520,GO:0006560,GO:0006561,GO:0006725,GO:0006790,GO:0006807,GO:0006950,GO:0006970,GO:0006972,GO:0007275,GO:0007568,GO:0008150,GO:0008152,GO:0008652,GO:0009058,GO:0009064,GO:0009084,GO:0009311,GO:0009312,GO:0009403,GO:0009404,GO:0009628,GO:0009651,GO:0009700,GO:0009718,GO:0009812,GO:0009813,GO:0009889,GO:…	-	-	-	-	-	-	-	-	-	-	NAM	2
27	C4869935:22522-22784_0	88036.EFJ14844	2.6e-23	93.6	28IZK@1|root,2QVXP@2759|Eukaryota,37K85@33090|Viridiplantae,3GB35@35493|Streptophyta	35493|Streptophyta	K	NAC domain-containing protein	-	GO:0003674,GO:0003700,GO:0006355,GO:0008150,GO:0009889,GO:0010468,GO:0010556,GO:0019219,GO:0019222,GO:0031323,GO:0031326,GO:0050789,GO:0050794,GO:0051171,GO:0051252,GO:0060255,GO:0065007,GO:0080090,GO:0140110,GO:1903506,GO:2000112,GO:2001141	-	-	-	-	-	-	-	-	-	-	NAM	2
28	C4870497:17769-18638_0	4432.XP_010269468.1	1.23e-41	152	28N3T@1|root,2QUNY@2759|Eukaryota,37I48@33090|Viridiplantae,3GGQZ@35493|Streptophyta	35493|Streptophyta	S	Protein kinase C conserved region 2 (CalB)	-	-	2.7.7.6	ko:K03006	ko00230,ko00240,ko01100,ko03020,ko05016,ko05168,ko05169,map00230,map00240,map01100,map03020,map05016,map05168,map05169	M00180	R00435,R00441,R00442,R00443	RC02795	br01611,ko00000,ko00001,ko00002,ko01000,ko03021,ko03400	-	-	-	C2	2
29	C4887279:18478-18741_0	90675.XP_010502438.1	1.89e-13	69.3	COG1131@1|root,KOG0061@2759|Eukaryota,37HHH@33090|Viridiplantae,3G7CT@35493|Streptophyta,3HQR0@3699|Brassicales	35493|Streptophyta	Q	ABC transporter G family member	-	GO:0003674,GO:0003824,GO:0005215,GO:0005575,GO:0005623,GO:0005886,GO:0006810,GO:0008150,GO:0015399,GO:0015405,GO:0016020,GO:0016021,GO:0016462,GO:0016787,GO:0016817,GO:0016818,GO:0016887,GO:0017111,GO:0022804,GO:0022857,GO:0031224,GO:0042623,GO:0042626,GO:0043492,GO:0044425,GO:0044464,GO:0051179,GO:0051234,GO:0055085,GO:0071944	-	-	-	-	-	-	-	-	-	-	ABC2_membrane,ABC_tran	2
30	C4887279:19116-19400_0	13333.ERM93644	7.59e-28	112	COG1131@1|root,KOG0061@2759|Eukaryota,37I5A@33090|Viridiplantae,3G73T@35493|Streptophyta	33090|Viridiplantae	Q	ABC transporter G family member	-	-	-	-	-	-	-	-	-	-	-	-	ABC2_membrane,ABC_tran	2
31	C4887279:19867-20148_0	38727.Pavir.J06421.1.p	3.43e-23	98.2	COG1131@1|root,KOG0061@2759|Eukaryota,37I5A@33090|Viridiplantae,3G73T@35493|Streptophyta,3KM1W@4447|Liliopsida,3I3ZA@38820|Poales	35493|Streptophyta	Q	ABC-2 type transporter	-	GO:0001101,GO:0003674,GO:0003824,GO:0005215,GO:0005575,GO:0005623,GO:0005886,GO:0006810,GO:0006833,GO:0006950,GO:0008150,GO:0009414,GO:0009415,GO:0009628,GO:0010035,GO:0010148,GO:0015399,GO:0015405,GO:0016020,GO:0016021,GO:0016462,GO:0016787,GO:0016817,GO:0016818,GO:0016887,GO:0017111,GO:0022804,GO:0022857,GO:0031224,GO:0042044,GO:0042221,GO:0042623,GO:0042626,GO:0043492,GO:0044425,GO:0044464,GO:…	-	-	-	-	-	-	-	-	-	-	ABC2_membrane,ABC_tran	2
32	C4887279:20233-20502_0	38727.Pavir.J06421.1.p	1.26e-28	112	COG1131@1|root,KOG0061@2759|Eukaryota,37I5A@33090|Viridiplantae,3G73T@35493|Streptophyta,3KM1W@4447|Liliopsida,3I3ZA@38820|Poales	35493|Streptophyta	Q	ABC-2 type transporter	-	GO:0001101,GO:0003674,GO:0003824,GO:0005215,GO:0005575,GO:0005623,GO:0005886,GO:0006810,GO:0006833,GO:0006950,GO:0008150,GO:0009414,GO:0009415,GO:0009628,GO:0010035,GO:0010148,GO:0015399,GO:0015405,GO:0016020,GO:0016021,GO:0016462,GO:0016787,GO:0016817,GO:0016818,GO:0016887,GO:0017111,GO:0022804,GO:0022857,GO:0031224,GO:0042044,GO:0042221,GO:0042623,GO:0042626,GO:0043492,GO:0044425,GO:0044464,GO:…	-	-	-	-	-	-	-	-	-	-	ABC2_membrane,ABC_tran	2
33	C4887279:20765-20948_0	50452.A0A087FX41	4.21e-24	93.2	COG1131@1|root,KOG0061@2759|Eukaryota,37I5A@33090|Viridiplantae,3G73T@35493|Streptophyta	35493|Streptophyta	Q	ABC transporter G family member	-	GO:0001101,GO:0003674,GO:0003824,GO:0005215,GO:0005575,GO:0005623,GO:0005886,GO:0006810,GO:0006833,GO:0006950,GO:0008150,GO:0009414,GO:0009415,GO:0009628,GO:0010035,GO:0010148,GO:0015399,GO:0015405,GO:0016020,GO:0016021,GO:0016462,GO:0016787,GO:0016817,GO:0016818,GO:0016887,GO:0017111,GO:0022804,GO:0022857,GO:0031224,GO:0042044,GO:0042221,GO:0042623,GO:0042626,GO:0043492,GO:0044425,GO:0044464,GO:…	-	-	-	-	-	-	-	-	-	-	ABC2_membrane,ABC_tran	2
34	C4887279:21585-21740_0	50452.A0A087HDM1	2.29e-10	60.5	COG1131@1|root,KOG0061@2759|Eukaryota,37I5A@33090|Viridiplantae,3G73T@35493|Streptophyta	35493|Streptophyta	Q	ABC transporter G family member	-	GO:0001101,GO:0003674,GO:0003824,GO:0005215,GO:0005575,GO:0005623,GO:0005886,GO:0006810,GO:0006833,GO:0006950,GO:0008150,GO:0009414,GO:0009415,GO:0009628,GO:0010035,GO:0010148,GO:0015399,GO:0015405,GO:0016020,GO:0016021,GO:0016462,GO:0016787,GO:0016817,GO:0016818,GO:0016887,GO:0017111,GO:0022804,GO:0022857,GO:0031224,GO:0042044,GO:0042221,GO:0042623,GO:0042626,GO:0043492,GO:0044425,GO:0044464,GO:…	-	-	-	-	-	-	-	-	-	-	ABC2_membrane,ABC_tran	2
35	C4887279:22817-23085_0	13333.ERM98989	2.53e-21	86.7	COG1131@1|root,KOG0061@2759|Eukaryota	2759|Eukaryota	V	ATPase activity, coupled to transmembrane movement of substances	-	-	-	-	-	-	-	-	-	-	-	-	ABC2_membrane,ABC_tran	2
36	C4911369:16028-16172_0	225117.XP_009340442.1	3.65e-17	76.3	COG0468@1|root,KOG1433@2759|Eukaryota	2759|Eukaryota	L	recombinase activity	-	GO:0000003,GO:0000018,GO:0000150,GO:0000166,GO:0000217,GO:0000228,GO:0000280,GO:0000400,GO:0000722,GO:0000723,GO:0000724,GO:0000725,GO:0000730,GO:0000781,GO:0000784,GO:0000785,GO:0000790,GO:0000793,GO:0000794,GO:0000795,GO:0000800,GO:0003674,GO:0003676,GO:0003677,GO:0003690,GO:0003697,GO:0003824,GO:0005488,GO:0005515,GO:0005524,GO:0005575,GO:0005622,GO:0005623,GO:0005634,GO:0005654,GO:0005694,GO:…	-	ko:K04482,ko:K10872	ko03440,ko03460,ko04113,ko05200,ko05212,map03440,map03460,map04113,map05200,map05212	-	-	-	ko00000,ko00001,ko03400,ko04121,ko04131	-	-	-	HHH_5,Rad51	2
37	C4911369:19166-19295_0	225117.XP_009369814.1	5.63e-20	82.8	COG0468@1|root,KOG1433@2759|Eukaryota,37M1K@33090|Viridiplantae,3GCRZ@35493|Streptophyta,4JN1I@91835|fabids	35493|Streptophyta	L	Binds to single and double-stranded DNA and exhibits DNA-dependent ATPase activity. Unwinds duplex DNA. Component of the meiotic recombination pathway. Seems to play a role in mediating chromosome homology search, chromosome pairing and synapsis at early stages and probably chromosome crossing-over at later stages in meiosis. Probably is involved in the repair of meiotic double strand breaks (DBS…	-	-	-	ko:K04482	ko03440,ko03460,ko05200,ko05212,map03440,map03460,map05200,map05212	-	-	-	ko00000,ko00001,ko03400,ko04121,ko04131	-	-	-	HHH_5,Rad51,RecA	2
38	C4911369:19485-19606_0	4641.GSMUA_Achr10P18700_001	3.63e-18	77.4	COG0468@1|root,KOG1433@2759|Eukaryota,37M1K@33090|Viridiplantae,3GCRZ@35493|Streptophyta,3KMW2@4447|Liliopsida	35493|Streptophyta	L	Binds to single and double-stranded DNA and exhibits DNA-dependent ATPase activity. Unwinds duplex DNA. Component of the meiotic recombination pathway. Seems to play a role in mediating chromosome homology search, chromosome pairing and synapsis at early stages and probably chromosome crossing-over at later stages in meiosis. Probably is involved in the repair of meiotic double strand breaks (DBS…	-	-	-	ko:K04482	ko03440,ko03460,ko05200,ko05212,map03440,map03460,map05200,map05212	-	-	-	ko00000,ko00001,ko03400,ko04121,ko04131	-	-	-	HHH_5,Rad51,RecA	2
39	C4911369:19728-19851_0	4529.ORUFI12G13930.1	2.17e-16	73.2	COG0468@1|root,KOG1433@2759|Eukaryota,37M1K@33090|Viridiplantae,3GCRZ@35493|Streptophyta,3KMW2@4447|Liliopsida,3ICTV@38820|Poales	35493|Streptophyta	L	Binds to single and double-stranded DNA and exhibits DNA-dependent ATPase activity. Unwinds duplex DNA. Component of the meiotic recombination pathway. Seems to play a role in mediating chromosome homology search, chromosome pairing and synapsis at early stages and probably chromosome crossing-over at later stages in meiosis. Probably is involved in the repair of meiotic double strand breaks (DBS…	-	-	-	ko:K04482	ko03440,ko03460,ko05200,ko05212,map03440,map03460,map05200,map05212	-	-	-	ko00000,ko00001,ko03400,ko04121,ko04131	-	-	-	HHH_5,Rad51,RecA	2
40	C4926623:36654-37097_0	3649.evm.model.supercontig_6.158	7.95e-25	105	28IIJ@1|root,2QQVK@2759|Eukaryota,37SA4@33090|Viridiplantae,3GC7U@35493|Streptophyta,3HZVJ@3699|Brassicales	35493|Streptophyta	S	SAM dependent carboxyl methyltransferase	-	-	2.1.1.273,2.1.1.274	ko:K21482,ko:K21483,ko:K21484	-	-	-	-	ko00000,ko01000	-	-	-	Methyltransf_7	2
41	C4926623:37455-37721_0	40149.OMERI04G23790.1	1.75e-15	77.4	28IIJ@1|root,2QQYU@2759|Eukaryota,37JD1@33090|Viridiplantae,3GDUS@35493|Streptophyta,3MAIA@4447|Liliopsida	35493|Streptophyta	S	SAM dependent carboxyl methyltransferase	IAMT1	GO:0000287,GO:0003002,GO:0003674,GO:0003824,GO:0005488,GO:0005515,GO:0007275,GO:0007389,GO:0008150,GO:0008152,GO:0008168,GO:0009798,GO:0009943,GO:0009944,GO:0009955,GO:0010252,GO:0016740,GO:0016741,GO:0032259,GO:0032501,GO:0032502,GO:0042592,GO:0042802,GO:0043167,GO:0043169,GO:0046872,GO:0048856,GO:0048878,GO:0051749,GO:0065001,GO:0065007,GO:0065008	2.1.1.278	ko:K18848	-	-	-	-	ko00000,ko01000	-	-	-	Methyltransf_7	2
42	C4937141:32341-33430_0	4432.XP_010255714.1	4.86e-77	266	2EF04@1|root,2SK9Z@2759|Eukaryota,37Z2C@33090|Viridiplantae,3GNBV@35493|Streptophyta	35493|Streptophyta	S	TIR domain	-	-	-	-	-	-	-	-	-	-	-	-	LRR_1,NB-ARC,TIR	2
43	C4937141:33524-34125_0	40148.OGLUM07G18800.1	3.14e-24	101	2CXI7@1|root,2RXQV@2759|Eukaryota,37TRI@33090|Viridiplantae,3GI0T@35493|Streptophyta,3M09M@4447|Liliopsida,3IGKS@38820|Poales	35493|Streptophyta	S	TIR domain	-	-	-	-	-	-	-	-	-	-	-	-	TIR,TIR_2	2
44	C4937283:24266-25100_0	3847.GLYMA18G04610.2	4.83e-14	79	28KX7@1|root,2QTDS@2759|Eukaryota,37RVD@33090|Viridiplantae,3GFFU@35493|Streptophyta,4JSMY@91835|fabids	35493|Streptophyta	S	Cysteine-rich repeat secretory protein	-	GO:0005575,GO:0005911,GO:0009506,GO:0030054,GO:0055044	-	-	-	-	-	-	-	-	-	-	Stress-antifung	2
45	C4937283:26006-26216_0	42345.XP_008782561.1	1.04e-24	100	COG0515@1|root,2RX9B@2759|Eukaryota,37SQB@33090|Viridiplantae,3GHG0@35493|Streptophyta,3KTI9@4447|Liliopsida	35493|Streptophyta	T	receptor-like protein kinase	-	-	2.7.11.1	ko:K04733	ko04010,ko04064,ko04620,ko04621,ko04624,ko04722,ko05133,ko05140,ko05142,ko05145,ko05152,ko05162,ko05164,map04010,map04064,map04620,map04621,map04624,map04722,map05133,map05140,map05142,map05145,map05152,map05162,map05164	M00686	-	-	ko00000,ko00001,ko00002,ko01000,ko01001	-	-	-	DUF3403,Pkinase,Pkinase_Tyr	2
46	C4937283:26311-26545_0	3750.XP_008351056.1	1.41e-29	112	COG0515@1|root,KOG1187@2759|Eukaryota,37JFM@33090|Viridiplantae,3G7TI@35493|Streptophyta,4JGJ2@91835|fabids	35493|Streptophyta	T	receptor-like protein kinase	-	GO:0003674,GO:0003824,GO:0004672,GO:0004674,GO:0005575,GO:0005623,GO:0005886,GO:0006464,GO:0006468,GO:0006793,GO:0006796,GO:0006807,GO:0006950,GO:0006952,GO:0008150,GO:0008152,GO:0009605,GO:0009607,GO:0009617,GO:0009987,GO:0016020,GO:0016301,GO:0016310,GO:0016740,GO:0016772,GO:0016773,GO:0019538,GO:0036211,GO:0042742,GO:0043170,GO:0043207,GO:0043412,GO:0044237,GO:0044238,GO:0044260,GO:0044267,GO:…	2.7.11.1	ko:K04733	ko04010,ko04064,ko04620,ko04621,ko04624,ko04722,ko05133,ko05140,ko05142,ko05145,ko05152,ko05162,ko05164,map04010,map04064,map04620,map04621,map04624,map04722,map05133,map05140,map05142,map05145,map05152,map05162,map05164	M00686	-	-	ko00000,ko00001,ko00002,ko01000,ko01001	-	-	-	Pkinase,Pkinase_Tyr	2
47	C4937283:26649-26793_0	72664.XP_006396983.1	2.64e-15	70.5	COG0515@1|root,2QVTV@2759|Eukaryota,37HTV@33090|Viridiplantae,3GD1F@35493|Streptophyta,3HQM3@3699|Brassicales	35493|Streptophyta	T	Cysteine-rich receptor-like protein kinase	-	GO:0003674,GO:0003824,GO:0004672,GO:0004674,GO:0005575,GO:0005623,GO:0005886,GO:0006464,GO:0006468,GO:0006793,GO:0006796,GO:0006807,GO:0008150,GO:0008152,GO:0009987,GO:0016020,GO:0016301,GO:0016310,GO:0016740,GO:0016772,GO:0016773,GO:0019538,GO:0036211,GO:0043170,GO:0043412,GO:0044237,GO:0044238,GO:0044260,GO:0044267,GO:0044464,GO:0071704,GO:0071944,GO:0140096,GO:1901564	-	-	-	-	-	-	-	-	-	-	Pkinase,Pkinase_Tyr,Stress-antifung	2
48	C4940741:17261-17777_0	42345.XP_008804684.1	2.01e-37	142	COG0515@1|root,2RFYK@2759|Eukaryota,37N04@33090|Viridiplantae,3GB6N@35493|Streptophyta,3KUY1@4447|Liliopsida	35493|Streptophyta	T	leucine-rich repeat receptor-like protein kinase At5g49770	-	-	-	-	-	-	-	-	-	-	-	-	LRRNT_2,Pkinase_Tyr	2
49	C4940741:19375-19597_0	3712.Bo12355s010.1	9.23e-26	98.2	COG0515@1|root,2QQH6@2759|Eukaryota,37I3H@33090|Viridiplantae,3GED1@35493|Streptophyta,3HTB4@3699|Brassicales	35493|Streptophyta	T	Belongs to the protein kinase superfamily. Ser Thr protein kinase family	-	-	-	-	-	-	-	-	-	-	-	-	LRRNT_2,LRR_1,LRR_4,Pkinase,Pkinase_Tyr	2
50	C4940741:19688-19926_0	4096.XP_009781542.1	1.89e-34	124	COG0515@1|root,2QQH6@2759|Eukaryota,37I3H@33090|Viridiplantae,3GED1@35493|Streptophyta,44G0G@71274|asterids	35493|Streptophyta	G	leucine-rich repeat receptor-like protein kinase At5g49770	-	-	-	-	-	-	-	-	-	-	-	-	LRRNT_2,LRR_1,Pkinase,Pkinase_Tyr	2
51	C4940741:20243-20725_0	4565.Traes_3AL_ECB9F7B2A.1	1.73e-24	103	COG0515@1|root,2RFYK@2759|Eukaryota,37N04@33090|Viridiplantae,3GB6N@35493|Streptophyta,3MBC8@4447|Liliopsida,3IUYE@38820|Poales	35493|Streptophyta	T	Belongs to the protein kinase superfamily. Ser Thr protein kinase family	-	-	-	-	-	-	-	-	-	-	-	-	LRRNT_2,Pkinase_Tyr	2
52	C4959485:20233-20719_0	42345.XP_008783759.1	6.66e-40	147	KOG4197@1|root,KOG4197@2759|Eukaryota,37JQ9@33090|Viridiplantae,3GE4M@35493|Streptophyta,3KYDN@4447|Liliopsida	35493|Streptophyta	S	Pentatricopeptide repeat domain	-	GO:0003674,GO:0003676,GO:0003723,GO:0003824,GO:0004518,GO:0004519,GO:0005488,GO:0005575,GO:0005622,GO:0005623,GO:0006139,GO:0006396,GO:0006725,GO:0006807,GO:0008150,GO:0008152,GO:0008380,GO:0009987,GO:0010467,GO:0016070,GO:0016787,GO:0016788,GO:0034641,GO:0043170,GO:0043226,GO:0043227,GO:0043229,GO:0043231,GO:0044237,GO:0044238,GO:0044424,GO:0044464,GO:0046483,GO:0071704,GO:0090304,GO:0090305,GO:…	2.7.4.14	ko:K13800	ko00240,ko00983,ko01100,map00240,map00983,map01100	M00052	R00158,R00512,R01665,R11891,R11892	RC00002	ko00000,ko00001,ko00002,ko01000	-	-	-	ADK,PPR,PPR_2	2
53	C4979759:11607-11859_0	3880.AES66806	2.25e-21	88.6	KOG0255@1|root,KOG0255@2759|Eukaryota,37QAZ@33090|Viridiplantae,3G9AQ@35493|Streptophyta,4JKBV@91835|fabids	35493|Streptophyta	S	Organic cation carnitine transporter	-	GO:0000325,GO:0001101,GO:0003674,GO:0005215,GO:0005575,GO:0005622,GO:0005623,GO:0005737,GO:0005773,GO:0005774,GO:0006810,GO:0006811,GO:0006820,GO:0006950,GO:0007154,GO:0008150,GO:0008509,GO:0008514,GO:0009414,GO:0009415,GO:0009507,GO:0009534,GO:0009535,GO:0009536,GO:0009579,GO:0009605,GO:0009628,GO:0009705,GO:0009987,GO:0009991,GO:0010035,GO:0015075,GO:0015711,GO:0016020,GO:0016021,GO:0022857,GO:…	-	ko:K08202	ko05231,map05231	-	-	-	ko00000,ko00001,ko02000	2.A.1.19.2,2.A.1.19.3	-	-	Sugar_tr	2
54	C4979759:11992-13208_0	29760.VIT_19s0014g04790.t01	1.31e-144	428	KOG0255@1|root,KOG0255@2759|Eukaryota,37QAZ@33090|Viridiplantae,3G9AQ@35493|Streptophyta	35493|Streptophyta	S	Organic cation carnitine transporter	-	GO:0000325,GO:0001101,GO:0003674,GO:0005215,GO:0005575,GO:0005622,GO:0005623,GO:0005737,GO:0005773,GO:0005774,GO:0006810,GO:0006811,GO:0006820,GO:0006950,GO:0007154,GO:0008150,GO:0008509,GO:0008514,GO:0009414,GO:0009415,GO:0009507,GO:0009534,GO:0009535,GO:0009536,GO:0009579,GO:0009605,GO:0009628,GO:0009705,GO:0009987,GO:0009991,GO:0010035,GO:0015075,GO:0015711,GO:0016020,GO:0016021,GO:0022857,GO:…	-	ko:K08202	ko05231,map05231	-	-	-	ko00000,ko00001,ko02000	2.A.1.19.2,2.A.1.19.3	-	-	Sugar_tr	2
55	C4999751:28404-30239_0	13333.ERN01091	2.06e-259	751	COG2940@1|root,KOG1082@2759|Eukaryota,37M8B@33090|Viridiplantae,3G83Q@35493|Streptophyta	35493|Streptophyta	B	histone-lysine N-methyltransferase, H3 lysine-9 specific	-	GO:0000166,GO:0003674,GO:0003676,GO:0003677,GO:0003824,GO:0005488,GO:0006325,GO:0006342,GO:0006355,GO:0006464,GO:0006479,GO:0006807,GO:0006996,GO:0008150,GO:0008152,GO:0008168,GO:0008213,GO:0008276,GO:0008327,GO:0009889,GO:0009890,GO:0009892,GO:0009987,GO:0010033,GO:0010200,GO:0010243,GO:0010428,GO:0010429,GO:0010468,GO:0010556,GO:0010558,GO:0010605,GO:0010629,GO:0016043,GO:0016458,GO:0016569,GO:…	2.1.1.43	ko:K11420	ko00310,ko04211,map00310,map04211	-	R03875,R03938,R04866,R04867	RC00003,RC00060,RC00181,RC00496	ko00000,ko00001,ko01000,ko03036	-	-	-	Pre-SET,SAD_SRA,SET	2
56	C5003495:28007-30796_0	3983.cassava4.1_028257m	3.14e-93	322	KOG4197@1|root,KOG4197@2759|Eukaryota,37HG6@33090|Viridiplantae,3GG3V@35493|Streptophyta,4JK86@91835|fabids	35493|Streptophyta	S	Pentatricopeptide repeat-containing protein	-	GO:0003674,GO:0003676,GO:0003723,GO:0003824,GO:0004518,GO:0004519,GO:0005488,GO:0005575,GO:0005622,GO:0005623,GO:0006139,GO:0006725,GO:0006807,GO:0008150,GO:0008152,GO:0009451,GO:0009987,GO:0016070,GO:0016787,GO:0016788,GO:0034641,GO:0043170,GO:0043226,GO:0043227,GO:0043229,GO:0043231,GO:0043412,GO:0044237,GO:0044238,GO:0044424,GO:0044464,GO:0046483,GO:0071704,GO:0090304,GO:0090305,GO:0097159,GO:…	-	-	-	-	-	-	-	-	-	-	PPR,PPR_2,PPR_3	2
57	C5003701:36378-36780_0	50452.A0A087HCB4	3.41e-58	192	COG3866@1|root,2QQ5F@2759|Eukaryota,37HIU@33090|Viridiplantae,3G7PT@35493|Streptophyta	35493|Streptophyta	G	Pectate lyase	-	-	4.2.2.2	ko:K01728	ko00040,ko02024,map00040,map02024	-	R02361,R06240	RC00049,RC00705	ko00000,ko00001,ko01000	-	-	-	Pec_lyase_C	2
58	C5003701:36859-36962_0	28532.XP_010527485.1	1.64e-13	64.7	COG3866@1|root,2QQ5F@2759|Eukaryota,37HIU@33090|Viridiplantae,3G7PT@35493|Streptophyta,3HZI6@3699|Brassicales	35493|Streptophyta	G	Pectate lyase	-	-	4.2.2.2	ko:K01728	ko00040,ko02024,map00040,map02024	-	R02361,R06240	RC00049,RC00705	ko00000,ko00001,ko01000	-	-	-	Pec_lyase_C	2
59	C5003701:37066-37711_0	38727.Pavir.J18523.1.p	4.57e-134	382	COG3866@1|root,2QQ5F@2759|Eukaryota,37HIU@33090|Viridiplantae,3G7PT@35493|Streptophyta,3KUK7@4447|Liliopsida,3IBSN@38820|Poales	35493|Streptophyta	G	Pectate lyase	-	GO:0005575,GO:0016020	4.2.2.2	ko:K01728	ko00040,ko02024,map00040,map02024	-	R02361,R06240	RC00049,RC00705	ko00000,ko00001,ko01000	-	-	-	Pec_lyase_C	2
60	C5006237:35154-35768_0	4432.XP_010241708.1	2.46e-79	241	297SB@1|root,2RESI@2759|Eukaryota,37NQI@33090|Viridiplantae,3GDK4@35493|Streptophyta	35493|Streptophyta	-	-	-	-	-	-	-	-	-	-	-	-	-	-	-	2
61	C5023867:35446-35875_0	13333.ERN15044	5.73e-85	251	KOG0660@1|root,KOG0660@2759|Eukaryota,37Q5A@33090|Viridiplantae,3G9UI@35493|Streptophyta	35493|Streptophyta	T	mitogen-activated protein kinase	-	GO:0000165,GO:0003674,GO:0003824,GO:0004672,GO:0004674,GO:0004707,GO:0005575,GO:0005622,GO:0005623,GO:0005634,GO:0005737,GO:0006464,GO:0006468,GO:0006793,GO:0006796,GO:0006807,GO:0007154,GO:0007165,GO:0008150,GO:0008152,GO:0009987,GO:0010468,GO:0016301,GO:0016310,GO:0016740,GO:0016772,GO:0016773,GO:0019222,GO:0019538,GO:0023014,GO:0023052,GO:0035556,GO:0036211,GO:0043170,GO:0043226,GO:0043227,GO:…	-	-	-	-	-	-	-	-	-	-	Pkinase	2
62	C5023867:36971-37098_0	4565.Traes_3AL_532CA9EE7.1	1.36e-21	88.2	KOG0660@1|root,KOG0660@2759|Eukaryota,37Q5A@33090|Viridiplantae,3GG4M@35493|Streptophyta,3KXQS@4447|Liliopsida,3I35X@38820|Poales	35493|Streptophyta	T	Mitogen-activated protein kinase	-	GO:0000165,GO:0003674,GO:0003824,GO:0004672,GO:0004674,GO:0004707,GO:0005575,GO:0005622,GO:0005623,GO:0005634,GO:0005737,GO:0006464,GO:0006468,GO:0006793,GO:0006796,GO:0006807,GO:0007154,GO:0007165,GO:0008150,GO:0008152,GO:0009987,GO:0010468,GO:0016301,GO:0016310,GO:0016740,GO:0016772,GO:0016773,GO:0019222,GO:0019538,GO:0023014,GO:0023052,GO:0035556,GO:0036211,GO:0043170,GO:0043226,GO:0043227,GO:…	2.7.11.24	ko:K20538	ko04016,map04016	-	-	-	ko00000,ko00001,ko01000,ko01001	-	-	-	Pkinase	2
63	C5028001:11059-13008_0	4432.XP_010270723.1	4.87e-179	537	KOG4197@1|root,KOG4197@2759|Eukaryota,37J9V@33090|Viridiplantae,3GEKJ@35493|Streptophyta	35493|Streptophyta	L	Pentatricopeptide repeat-containing protein	-	GO:0003674,GO:0003676,GO:0003723,GO:0003824,GO:0004518,GO:0004519,GO:0005488,GO:0005575,GO:0005622,GO:0005623,GO:0006139,GO:0006725,GO:0006807,GO:0008150,GO:0008152,GO:0009451,GO:0009987,GO:0016070,GO:0016787,GO:0016788,GO:0034641,GO:0043170,GO:0043226,GO:0043227,GO:0043229,GO:0043231,GO:0043412,GO:0044237,GO:0044238,GO:0044424,GO:0044464,GO:0046483,GO:0071704,GO:0090304,GO:0090305,GO:0097159,GO:…	-	-	-	-	-	-	-	-	-	-	DYW_deaminase,PPR,PPR_2	2
64	C5029087:28971-29718_0	13333.ERN09664	1.06e-102	306	KOG1638@1|root,KOG1638@2759|Eukaryota,37IXW@33090|Viridiplantae,3GAQZ@35493|Streptophyta	35493|Streptophyta	I	Steroid 5-alpha-reductase	-	GO:0003674,GO:0003824,GO:0003865,GO:0006629,GO:0006694,GO:0008150,GO:0008152,GO:0008202,GO:0008610,GO:0009058,GO:0009917,GO:0010268,GO:0010817,GO:0016128,GO:0016129,GO:0016131,GO:0016132,GO:0016229,GO:0016491,GO:0016627,GO:0016628,GO:0033765,GO:0042445,GO:0042446,GO:0042592,GO:0044238,GO:0048878,GO:0050213,GO:0055088,GO:0055114,GO:0065007,GO:0065008,GO:0071704,GO:1901360,GO:1901362,GO:1901576,GO:…	1.3.1.22	ko:K09591	ko00905,ko01100,ko01110,map00905,map01100,map01110	M00371	R07429,R07447	RC00145	ko00000,ko00001,ko00002,ko01000	-	-	-	Steroid_dh	2
65	C5031887:23260-23405_0	38727.Pavir.Ga02612.1.p	2.04e-19	82	COG2939@1|root,KOG1282@2759|Eukaryota,37M2A@33090|Viridiplantae,3G7C5@35493|Streptophyta,3KNK7@4447|Liliopsida,3I2J6@38820|Poales	35493|Streptophyta	O	Belongs to the peptidase S10 family	-	-	-	ko:K16296	-	-	-	-	ko00000,ko01000,ko01002	-	-	-	Peptidase_S10	2
66	C5031887:25372-25494_0	81985.XP_006296649.1	5.79e-11	60.8	COG2939@1|root,KOG1282@2759|Eukaryota,37M2A@33090|Viridiplantae,3G7C5@35493|Streptophyta,3HWTU@3699|Brassicales	35493|Streptophyta	O	Belongs to the peptidase S10 family	-	GO:0003674,GO:0003824,GO:0005575,GO:0005622,GO:0005623,GO:0005737,GO:0005773,GO:0005777,GO:0008150,GO:0008152,GO:0016740,GO:0016746,GO:0016747,GO:0019748,GO:0042579,GO:0043226,GO:0043227,GO:0043229,GO:0043231,GO:0044424,GO:0044444,GO:0044464	-	ko:K16296	-	-	-	-	ko00000,ko01000,ko01002	-	-	-	Peptidase_S10	2
67	C5032715:11264-11797_0	3218.PP1S47_136V6.1	9.6e-43	156	COG0814@1|root,KOG1303@2759|Eukaryota,37Q9B@33090|Viridiplantae,3GBVF@35493|Streptophyta	35493|Streptophyta	E	amino acid transporter	-	-	-	ko:K15015	ko04721,ko04723,ko04727,ko05032,ko05033,map04721,map04723,map04727,map05032,map05033	-	-	-	ko00000,ko00001,ko02000	2.A.18.5	-	-	Aa_trans	2
68	C5032715:12588-13216_0	38727.Pavir.Gb01584.1.p	6.09e-65	209	COG0814@1|root,KOG1303@2759|Eukaryota,37K29@33090|Viridiplantae,3G9Y5@35493|Streptophyta,3KSF5@4447|Liliopsida,3I3RV@38820|Poales	35493|Streptophyta	E	Transmembrane amino acid transporter protein	-	-	-	ko:K15015	ko04721,ko04723,ko04727,ko05032,ko05033,map04721,map04723,map04727,map05032,map05033	-	-	-	ko00000,ko00001,ko02000	2.A.18.5	-	-	Aa_trans	2
69	C5032939:24872-27646_0	4432.XP_010242634.1	6.72e-255	747	KOG4197@1|root,KOG4197@2759|Eukaryota,37P1P@33090|Viridiplantae,3GEGY@35493|Streptophyta	35493|Streptophyta	J	Pentatricopeptide repeat-containing protein	-	GO:0003674,GO:0003676,GO:0003723,GO:0003824,GO:0004518,GO:0004519,GO:0005488,GO:0005575,GO:0005622,GO:0005623,GO:0006139,GO:0006725,GO:0006807,GO:0008150,GO:0008152,GO:0009451,GO:0009987,GO:0016070,GO:0016071,GO:0016556,GO:0016787,GO:0016788,GO:0034641,GO:0043170,GO:0043226,GO:0043227,GO:0043229,GO:0043231,GO:0043412,GO:0044237,GO:0044238,GO:0044424,GO:0044464,GO:0046483,GO:0071704,GO:0090304,GO:…	-	-	-	-	-	-	-	-	-	-	DYW_deaminase,PPR,PPR_2	2
70	C5033031:38416-39376_0	3847.GLYMA09G38710.1	9.24e-88	276	COG0517@1|root,KOG1764@2759|Eukaryota,37IKM@33090|Viridiplantae,3GCV8@35493|Streptophyta,4JE5W@91835|fabids	35493|Streptophyta	C	CBS domain-containing protein	-	GO:0005575,GO:0005622,GO:0005623,GO:0005737,GO:0005773,GO:0043226,GO:0043227,GO:0043229,GO:0043231,GO:0044424,GO:0044444,GO:0044464	-	-	-	-	-	-	-	-	-	-	CBS	2
71	C5033031:39474-39823_0	4432.XP_010268326.1	6.46e-38	139	COG0517@1|root,KOG1764@2759|Eukaryota,37IKM@33090|Viridiplantae,3GCV8@35493|Streptophyta	35493|Streptophyta	C	CBS domain-containing protein	-	GO:0005575,GO:0005622,GO:0005623,GO:0005737,GO:0005773,GO:0043226,GO:0043227,GO:0043229,GO:0043231,GO:0044424,GO:0044444,GO:0044464	-	-	-	-	-	-	-	-	-	-	CBS	2
72	C5033127:17801-18187_0	3847.GLYMA07G17931.1	6.61e-12	67.8	28MR7@1|root,2QU99@2759|Eukaryota,37T34@33090|Viridiplantae,3G9ZZ@35493|Streptophyta,4JP6F@91835|fabids	35493|Streptophyta	S	Starch binding domain	-	-	-	-	-	-	-	-	-	-	-	-	CBM_20	2
73	C5033127:18284-18512_0	3983.cassava4.1_014927m	1.43e-14	72.8	2D0TT@1|root,2SFFU@2759|Eukaryota,3806K@33090|Viridiplantae,3GPXB@35493|Streptophyta,4JUDV@91835|fabids	35493|Streptophyta	S	Starch binding domain	-	-	-	-	-	-	-	-	-	-	-	-	CBM_20	2
74	C5033289:30243-30959_0	4432.XP_010262305.1	1.97e-39	143	290FS@1|root,2RBAX@2759|Eukaryota,37TAK@33090|Viridiplantae,3GFW9@35493|Streptophyta	35493|Streptophyta	K	ethylene-responsive transcription factor	-	GO:0000160,GO:0003674,GO:0003700,GO:0005575,GO:0005622,GO:0005623,GO:0005737,GO:0006355,GO:0007154,GO:0007165,GO:0008150,GO:0009507,GO:0009536,GO:0009719,GO:0009723,GO:0009725,GO:0009755,GO:0009873,GO:0009889,GO:0009987,GO:0010033,GO:0010200,GO:0010243,GO:0010468,GO:0010556,GO:0019219,GO:0019222,GO:0023052,GO:0031323,GO:0031326,GO:0032870,GO:0035556,GO:0042221,GO:0042493,GO:0043226,GO:0043227,GO:…	-	ko:K14516	ko04016,ko04075,map04016,map04075	-	-	-	ko00000,ko00001,ko03000	-	-	-	AP2	2
75	C5034589:42932-43651_0	13333.ERN05581	8.83e-37	135	2CG91@1|root,2RZQP@2759|Eukaryota,37V07@33090|Viridiplantae,3GJ64@35493|Streptophyta	35493|Streptophyta	K	transcription factor	-	-	-	-	-	-	-	-	-	-	-	-	AP2	2
76	C5036223:4686-7139_0	4432.XP_010269696.1	8.6e-195	583	KOG4197@1|root,KOG4197@2759|Eukaryota,37KPM@33090|Viridiplantae,3G7I0@35493|Streptophyta	35493|Streptophyta	J	Pentatricopeptide repeat-containing protein	-	GO:0003674,GO:0003676,GO:0003723,GO:0003824,GO:0004518,GO:0004519,GO:0005488,GO:0005575,GO:0005622,GO:0005623,GO:0006139,GO:0006725,GO:0006807,GO:0008150,GO:0008152,GO:0009451,GO:0009987,GO:0016070,GO:0016787,GO:0016788,GO:0034641,GO:0043170,GO:0043226,GO:0043227,GO:0043229,GO:0043231,GO:0043412,GO:0044237,GO:0044238,GO:0044424,GO:0044464,GO:0046483,GO:0071704,GO:0090304,GO:0090305,GO:0097159,GO:…	-	-	-	-	-	-	-	-	-	-	DYW_deaminase,PPR,PPR_2	2
77	C5041785:21511-24224_0	3641.EOY30922	1.78e-100	340	KOG4197@1|root,KOG4197@2759|Eukaryota,37T19@33090|Viridiplantae,3GH6J@35493|Streptophyta	35493|Streptophyta	S	Pentatricopeptide repeat-containing protein	-	GO:0003674,GO:0003676,GO:0003723,GO:0003824,GO:0004518,GO:0004519,GO:0005488,GO:0005575,GO:0005622,GO:0005623,GO:0006139,GO:0006725,GO:0006807,GO:0008150,GO:0008152,GO:0009451,GO:0009987,GO:0016070,GO:0016071,GO:0016556,GO:0016787,GO:0016788,GO:0034641,GO:0043170,GO:0043226,GO:0043227,GO:0043229,GO:0043231,GO:0043412,GO:0044237,GO:0044238,GO:0044424,GO:0044464,GO:0046483,GO:0071704,GO:0090304,GO:…	-	-	-	-	-	-	-	-	-	-	PPR,PPR_2,PPR_3	2
78	C5062991:60861-61779_0	13333.ERN19726	1.8e-57	199	KOG1192@1|root,KOG1192@2759|Eukaryota,37MYI@33090|Viridiplantae,3G8WS@35493|Streptophyta	35493|Streptophyta	CG	Belongs to the UDP-glycosyltransferase family	-	-	2.4.1.218	ko:K08237	-	-	-	-	ko00000,ko01000,ko01003	-	GT1	-	UDPGT	2
79	scaffold100099:60463-61417_0	588596.U9TT36	6.42e-11	67.8	KOG1477@1|root,KOG1477@2759|Eukaryota	2759|Eukaryota	F	protein transport to vacuole involved in ubiquitin-dependent protein catabolic process via the multivesicular body sorting pathway	-	-	-	-	-	-	-	-	-	-	-	-	SPRY	2
80	scaffold100443:86990-87253_0	3649.evm.model.supercontig_43.138	1.27e-13	69.3	2CS5U@1|root,2RAHZ@2759|Eukaryota,37QD8@33090|Viridiplantae,3GGXY@35493|Streptophyta,3HWGD@3699|Brassicales	35493|Streptophyta	K	growth-regulating factor	-	GO:0005575,GO:0005622,GO:0005623,GO:0005634,GO:0007275,GO:0008150,GO:0032501,GO:0032502,GO:0043226,GO:0043227,GO:0043229,GO:0043231,GO:0044424,GO:0044464,GO:0048366,GO:0048367,GO:0048731,GO:0048827,GO:0048856,GO:0099402	-	-	-	-	-	-	-	-	-	-	QLQ,WRC	2
81	scaffold100443:87343-87793_0	29760.VIT_00s0494g00010.t01	2.96e-30	122	28J7T@1|root,2QRK7@2759|Eukaryota,37MV0@33090|Viridiplantae,3GFPP@35493|Streptophyta	35493|Streptophyta	K	growth-regulating factor	-	-	-	-	-	-	-	-	-	-	-	-	QLQ,WRC	2
82	scaffold100443:88315-89237_0	3218.PP1S344_39V6.1	8.1e-20	97.8	2CMWW@1|root,2QSFK@2759|Eukaryota,37I77@33090|Viridiplantae,3GA5I@35493|Streptophyta	35493|Streptophyta	K	growth-regulating factor	-	-	-	-	-	-	-	-	-	-	-	-	QLQ,WRC	2
83	scaffold101402:82250-83026_0	225117.XP_009340246.1	2.61e-16	86.3	KOG4197@1|root,KOG4197@2759|Eukaryota,37I56@33090|Viridiplantae,3GD6T@35493|Streptophyta,4JHAT@91835|fabids	35493|Streptophyta	S	Pentatricopeptide repeat-containing protein	-	GO:0003674,GO:0003676,GO:0003723,GO:0003824,GO:0004518,GO:0004519,GO:0005488,GO:0005575,GO:0005622,GO:0005623,GO:0006139,GO:0006725,GO:0006807,GO:0008150,GO:0008152,GO:0009451,GO:0009987,GO:0016070,GO:0016787,GO:0016788,GO:0034641,GO:0043170,GO:0043226,GO:0043227,GO:0043229,GO:0043231,GO:0043412,GO:0044237,GO:0044238,GO:0044424,GO:0044464,GO:0046483,GO:0071704,GO:0090304,GO:0090305,GO:0097159,GO:…	-	-	-	-	-	-	-	-	-	-	PPR,PPR_2	2
84	scaffold101402:82652-85186_0	4432.XP_010260584.1	1.5e-218	648	KOG4197@1|root,KOG4197@2759|Eukaryota,37RPP@33090|Viridiplantae,3GGIG@35493|Streptophyta	35493|Streptophyta	S	Pentatricopeptide repeat-containing protein	-	-	-	-	-	-	-	-	-	-	-	-	DYW_deaminase,PPR,PPR_2	2
85	scaffold101647:68022-68151_0	88036.EFJ28701	1.02e-17	76.6	2C450@1|root,2S2V5@2759|Eukaryota,37VKZ@33090|Viridiplantae,3GJIJ@35493|Streptophyta	35493|Streptophyta	S	May serve as docking site to facilitate the association of other proteins to the plasma membrane	-	-	-	-	-	-	-	-	-	-	-	-	Rad60-SLD_2	2
86	scaffold101647:72013-72183_0	102107.XP_008233977.1	9.82e-22	87.4	2C450@1|root,2S2V5@2759|Eukaryota,37VKZ@33090|Viridiplantae,3GJIJ@35493|Streptophyta,4JU5W@91835|fabids	35493|Streptophyta	S	Membrane-anchored ubiquitin-fold protein	-	-	-	-	-	-	-	-	-	-	-	-	Rad60-SLD_2	2
87	scaffold101896:280651-281740_0	4432.XP_010255714.1	1.48e-75	261	2EF04@1|root,2SK9Z@2759|Eukaryota,37Z2C@33090|Viridiplantae,3GNBV@35493|Streptophyta	35493|Streptophyta	S	TIR domain	-	-	-	-	-	-	-	-	-	-	-	-	LRR_1,NB-ARC,TIR	2
88	scaffold101896:281963-282318_0	71139.XP_010041167.1	8.34e-23	94.4	28I92@1|root,2QQJE@2759|Eukaryota,37M5G@33090|Viridiplantae,3GG0S@35493|Streptophyta	35493|Streptophyta	S	TMV resistance protein N-like	-	-	-	-	-	-	-	-	-	-	-	-	LRR_1,LRR_8,NB-ARC,TIR	2
89	scaffold101896:281963-282498_0	71139.XP_010041167.1	2e-29	113	28I92@1|root,2QQJE@2759|Eukaryota,37M5G@33090|Viridiplantae,3GG0S@35493|Streptophyta	35493|Streptophyta	S	TMV resistance protein N-like	-	-	-	-	-	-	-	-	-	-	-	-	LRR_1,LRR_8,NB-ARC,TIR	2
90	scaffold102070:93163-93852_0	4432.XP_010270615.1	7.58e-63	202	2CIVD@1|root,2QT52@2759|Eukaryota,37KME@33090|Viridiplantae,3G93Q@35493|Streptophyta	35493|Streptophyta	S	Protein of unknown function, DUF617	-	-	-	-	-	-	-	-	-	-	-	-	DUF617	2
91	scaffold102129:122216-123166_0	29760.VIT_04s0008g05410.t01	2.96e-95	291	COG0657@1|root,KOG1515@2759|Eukaryota,37JN1@33090|Viridiplantae,3GFXC@35493|Streptophyta	35493|Streptophyta	V	carboxylesterase 17	-	-	-	-	-	-	-	-	-	-	-	-	Abhydrolase_3	2
92	scaffold102129:122333-123166_0	29760.VIT_04s0008g05370.t01	2.07e-85	265	COG0657@1|root,KOG1515@2759|Eukaryota,37JN1@33090|Viridiplantae,3GFXC@35493|Streptophyta	35493|Streptophyta	V	carboxylesterase 17	-	-	-	-	-	-	-	-	-	-	-	-	Abhydrolase_3	2
93	scaffold102184:33078-33268_0	218851.Aquca_021_00024.1	7.35e-19	80.1	KOG1835@1|root,KOG1835@2759|Eukaryota,37IXG@33090|Viridiplantae,3G92H@35493|Streptophyta	35493|Streptophyta	S	Nuclear pore complex protein	-	GO:0003674,GO:0005198,GO:0005575,GO:0005622,GO:0005623,GO:0005634,GO:0005635,GO:0005643,GO:0005737,GO:0006810,GO:0006913,GO:0006996,GO:0006997,GO:0006999,GO:0008150,GO:0009507,GO:0009536,GO:0009987,GO:0012505,GO:0016043,GO:0017056,GO:0031967,GO:0031975,GO:0032991,GO:0043226,GO:0043227,GO:0043229,GO:0043231,GO:0043933,GO:0044422,GO:0044424,GO:0044428,GO:0044444,GO:0044446,GO:0044464,GO:0044611,GO:…	-	ko:K14310	ko03013,map03013	M00427	-	-	ko00000,ko00001,ko00002,ko03019,ko03036	1.I.1	-	-	Nup192	2
94	scaffold102520:169772-170355_0	2711.XP_006480654.1	3.95e-37	144	KOG4197@1|root,KOG4197@2759|Eukaryota,37T97@33090|Viridiplantae,3G80T@35493|Streptophyta	35493|Streptophyta	S	Pentatricopeptide repeat-containing protein	-	GO:0003674,GO:0003676,GO:0003723,GO:0003824,GO:0004518,GO:0004519,GO:0005488,GO:0005575,GO:0005622,GO:0005623,GO:0006139,GO:0006725,GO:0006807,GO:0008150,GO:0008152,GO:0009451,GO:0009987,GO:0016070,GO:0016787,GO:0016788,GO:0034641,GO:0043170,GO:0043226,GO:0043227,GO:0043229,GO:0043231,GO:0043412,GO:0044237,GO:0044238,GO:0044424,GO:0044464,GO:0046483,GO:0071704,GO:0090304,GO:0090305,GO:0097159,GO:…	-	-	-	-	-	-	-	-	-	-	PPR,PPR_2,PPR_3	2
95	scaffold102520:170443-172130_0	3218.PP1S13_264V6.1	1.28e-171	511	KOG4197@1|root,KOG4197@2759|Eukaryota,37M8J@33090|Viridiplantae,3GA8V@35493|Streptophyta	2759|Eukaryota	S	Pentatricopeptide repeat-containing protein	-	-	-	-	-	-	-	-	-	-	-	-	PPR_2	2
96	scaffold102790:156904-159726_0	4432.XP_010271776.1	2.11e-183	563	KOG4197@1|root,KOG4197@2759|Eukaryota,37QSP@33090|Viridiplantae,3GG6Z@35493|Streptophyta	35493|Streptophyta	S	DYW family of nucleic acid deaminases	-	-	-	-	-	-	-	-	-	-	-	-	DYW_deaminase,PPR,PPR_2,PPR_3	2
97	scaffold103142:116660-117064_0	4530.OS02T0208300-01	5.63e-36	129	COG1131@1|root,KOG0065@2759|Eukaryota,37P62@33090|Viridiplantae,3GB0P@35493|Streptophyta,3KS96@4447|Liliopsida,3I6QS@38820|Poales	35493|Streptophyta	Q	Belongs to the ABC transporter superfamily. ABCG family. PDR (TC 3.A.1.205) subfamily	-	-	-	-	-	-	-	-	-	-	-	-	ABC2_membrane,ABC_tran,ABC_trans_N,PDR_assoc	2
98	scaffold103142:116748-117064_0	4530.OS02T0208300-01	1.44e-35	126	COG1131@1|root,KOG0065@2759|Eukaryota,37P62@33090|Viridiplantae,3GB0P@35493|Streptophyta,3KS96@4447|Liliopsida,3I6QS@38820|Poales	35493|Streptophyta	Q	Belongs to the ABC transporter superfamily. ABCG family. PDR (TC 3.A.1.205) subfamily	-	-	-	-	-	-	-	-	-	-	-	-	ABC2_membrane,ABC_tran,ABC_trans_N,PDR_assoc	2
99	scaffold103142:117174-117452_0	13333.ERM97075	5.31e-30	110	COG1131@1|root,KOG0065@2759|Eukaryota,37P62@33090|Viridiplantae	33090|Viridiplantae	Q	Belongs to the ABC transporter superfamily. ABCG family. PDR (TC 3.A.1.205) subfamily	-	-	-	-	-	-	-	-	-	-	-	-	ABC2_membrane,ABC_tran,ABC_trans_N,PDR_assoc	2
100	scaffold103142:119003-119395_0	40148.OGLUM02G10130.1	2.13e-62	198	COG1131@1|root,KOG0065@2759|Eukaryota,37NZT@33090|Viridiplantae,3GDC6@35493|Streptophyta,3KNW1@4447|Liliopsida,3IF4E@38820|Poales	35493|Streptophyta	Q	Belongs to the ABC transporter superfamily. ABCG family. PDR (TC 3.A.1.205) subfamily	-	-	-	-	-	-	-	-	-	-	-	-	ABC2_membrane,ABC_tran,ABC_trans_N,PDR_assoc	2
101	scaffold103142:120439-120598_0	4113.PGSC0003DMT400034141	1.84e-22	88.2	COG1131@1|root,KOG0065@2759|Eukaryota	4113.PGSC0003DMT400034141|-	V	ATPase activity	-	-	-	-	-	-	-	-	-	-	-	-	-	2
102	scaffold1032:281410-283104_0	3988.XP_002523775.1	6.99e-244	688	COG2124@1|root,KOG0157@2759|Eukaryota,37IK4@33090|Viridiplantae,3G7CM@35493|Streptophyta,4JM7W@91835|fabids	35493|Streptophyta	Q	Cytochrome p450	-	GO:0000038,GO:0005575,GO:0005622,GO:0005623,GO:0005737,GO:0005783,GO:0006082,GO:0006629,GO:0006631,GO:0006633,GO:0006725,GO:0008150,GO:0008152,GO:0008610,GO:0009058,GO:0009698,GO:0009699,GO:0009987,GO:0010345,GO:0012505,GO:0016053,GO:0019438,GO:0019748,GO:0019752,GO:0032787,GO:0042761,GO:0043226,GO:0043227,GO:0043229,GO:0043231,GO:0043436,GO:0044237,GO:0044238,GO:0044249,GO:0044255,GO:0044281,GO:…	-	ko:K15402	ko00073,map00073	-	R09454	RC00797	ko00000,ko00001,ko00199,ko01000	-	-	-	p450	2
103	scaffold104263:294868-295739_0	3649.evm.model.supercontig_53.15	7.82e-92	283	KOG0788@1|root,KOG0788@2759|Eukaryota,37K5I@33090|Viridiplantae,3GAI8@35493|Streptophyta,3HNNJ@3699|Brassicales	35493|Streptophyta	T	decarboxylase	SAMDC	GO:0003674,GO:0003824,GO:0004014,GO:0005575,GO:0005622,GO:0005623,GO:0005737,GO:0005829,GO:0006576,GO:0006595,GO:0006596,GO:0006597,GO:0006807,GO:0008150,GO:0008152,GO:0008215,GO:0008216,GO:0008295,GO:0009058,GO:0009308,GO:0009309,GO:0009987,GO:0016829,GO:0016830,GO:0016831,GO:0017144,GO:0034641,GO:0042401,GO:0044106,GO:0044237,GO:0044249,GO:0044271,GO:0044424,GO:0044444,GO:0044464,GO:0071704,GO:…	4.1.1.50	ko:K01611	ko00270,ko00330,ko01100,map00270,map00330,map01100	M00034,M00133	R00178	RC00299	ko00000,ko00001,ko00002,ko01000	-	-	-	AdoMetDC_leader,SAM_decarbox	2
104	scaffold10540:141092-141465_0	3750.XP_008378989.1	2.1e-42	145	COG1502@1|root,KOG1329@2759|Eukaryota,37RV8@33090|Viridiplantae,3GDCU@35493|Streptophyta,4JN73@91835|fabids	35493|Streptophyta	I	phospholipase D	-	GO:0003674,GO:0003824,GO:0004620,GO:0004630,GO:0005575,GO:0005622,GO:0005623,GO:0005737,GO:0005773,GO:0005886,GO:0005911,GO:0006629,GO:0006644,GO:0006650,GO:0006793,GO:0006796,GO:0006950,GO:0008081,GO:0008150,GO:0008152,GO:0008219,GO:0009266,GO:0009409,GO:0009506,GO:0009628,GO:0009787,GO:0009789,GO:0009966,GO:0009967,GO:0009987,GO:0010119,GO:0010646,GO:0010647,GO:0012501,GO:0016020,GO:0016298,GO:…	3.1.4.4	ko:K01115	ko00564,ko00565,ko01100,ko01110,ko04014,ko04024,ko04071,ko04072,ko04144,ko04666,ko04724,ko04912,ko05231,map00564,map00565,map01100,map01110,map04014,map04024,map04071,map04072,map04144,map04666,map04724,map04912,map05231	-	R01310,R02051,R07385	RC00017,RC00425	ko00000,ko00001,ko01000,ko04131	-	-	-	C2,PLD_C,PLDc	2
105	scaffold105593:43630-44496_0	4432.XP_010271319.1	1.5e-97	300	KOG4197@1|root,KOG4197@2759|Eukaryota,37N7B@33090|Viridiplantae,3G9NU@35493|Streptophyta	35493|Streptophyta	F	Pentatricopeptide repeat-containing protein	-	GO:0003674,GO:0003676,GO:0003723,GO:0003824,GO:0004518,GO:0004519,GO:0005488,GO:0005575,GO:0005622,GO:0005623,GO:0006139,GO:0006725,GO:0006807,GO:0008150,GO:0008152,GO:0009451,GO:0009987,GO:0016070,GO:0016787,GO:0016788,GO:0034641,GO:0043170,GO:0043226,GO:0043227,GO:0043229,GO:0043231,GO:0043412,GO:0044237,GO:0044238,GO:0044424,GO:0044464,GO:0046483,GO:0071704,GO:0090304,GO:0090305,GO:0097159,GO:…	2.7.1.21	ko:K00857	ko00240,ko00983,ko01100,map00240,map00983,map01100	-	R01567,R02099,R08233	RC00002,RC00017	ko00000,ko00001,ko01000	-	-	-	PPR,PPR_2,TK	2
106	scaffold106806:233130-233450_0	4565.Traes_2AS_FE3FAFAE1.1	1.68e-51	176	COG1132@1|root,KOG0054@2759|Eukaryota,37KV9@33090|Viridiplantae,3GA2M@35493|Streptophyta,3M54G@4447|Liliopsida,3ICXD@38820|Poales	35493|Streptophyta	Q	ABC transporter	-	GO:0000325,GO:0001101,GO:0003674,GO:0003824,GO:0005215,GO:0005575,GO:0005622,GO:0005623,GO:0005737,GO:0005773,GO:0005774,GO:0005794,GO:0005886,GO:0005911,GO:0006810,GO:0006855,GO:0006950,GO:0008150,GO:0009414,GO:0009415,GO:0009506,GO:0009605,GO:0009607,GO:0009611,GO:0009624,GO:0009628,GO:0009987,GO:0010035,GO:0010118,GO:0012505,GO:0015399,GO:0015405,GO:0015893,GO:0016020,GO:0016462,GO:0016787,GO:…	-	ko:K05665,ko:K05666	ko01523,ko01524,ko02010,ko04071,ko04976,ko04977,ko05206,map01523,map01524,map02010,map04071,map04976,map04977,map05206	-	-	-	ko00000,ko00001,ko02000	3.A.1.208.2,3.A.1.208.8	-	-	ABC_membrane,ABC_tran	2
107	scaffold106806:233956-234308_0	4565.Traes_2AS_FE3FAFAE1.1	6.67e-17	82.8	COG1132@1|root,KOG0054@2759|Eukaryota,37KV9@33090|Viridiplantae,3GA2M@35493|Streptophyta,3M54G@4447|Liliopsida,3ICXD@38820|Poales	35493|Streptophyta	Q	ABC transporter	-	GO:0000325,GO:0001101,GO:0003674,GO:0003824,GO:0005215,GO:0005575,GO:0005622,GO:0005623,GO:0005737,GO:0005773,GO:0005774,GO:0005794,GO:0005886,GO:0005911,GO:0006810,GO:0006855,GO:0006950,GO:0008150,GO:0009414,GO:0009415,GO:0009506,GO:0009605,GO:0009607,GO:0009611,GO:0009624,GO:0009628,GO:0009987,GO:0010035,GO:0010118,GO:0012505,GO:0015399,GO:0015405,GO:0015893,GO:0016020,GO:0016462,GO:0016787,GO:…	-	ko:K05665,ko:K05666	ko01523,ko01524,ko02010,ko04071,ko04976,ko04977,ko05206,map01523,map01524,map02010,map04071,map04976,map04977,map05206	-	-	-	ko00000,ko00001,ko02000	3.A.1.208.2,3.A.1.208.8	-	-	ABC_membrane,ABC_tran	2
108	scaffold106806:234761-234925_0	4565.Traes_5AL_81602ECE9.1	4.48e-13	68.2	COG1132@1|root,KOG0054@2759|Eukaryota,37KV9@33090|Viridiplantae,3GA2M@35493|Streptophyta,3KT2M@4447|Liliopsida	35493|Streptophyta	Q	ABC transporter C family member	-	-	-	ko:K05665	ko01523,ko02010,ko04071,ko04977,ko05206,map01523,map02010,map04071,map04977,map05206	-	-	-	ko00000,ko00001,ko02000	3.A.1.208.8	-	-	ABC_membrane,ABC_tran	2
109	scaffold106806:236337-236631_0	4565.Traes_5AL_81602ECE9.1	7.34e-38	134	COG1132@1|root,KOG0054@2759|Eukaryota,37KV9@33090|Viridiplantae,3GA2M@35493|Streptophyta,3KT2M@4447|Liliopsida	35493|Streptophyta	Q	ABC transporter C family member	-	-	-	ko:K05665	ko01523,ko02010,ko04071,ko04977,ko05206,map01523,map02010,map04071,map04977,map05206	-	-	-	ko00000,ko00001,ko02000	3.A.1.208.8	-	-	ABC_membrane,ABC_tran	2
110	scaffold10713:57522-59024_0	2711.XP_006490583.1	7.34e-29	125	290FS@1|root,2R7AV@2759|Eukaryota,37V58@33090|Viridiplantae,3G7PM@35493|Streptophyta	35493|Streptophyta	K	transcription factor	-	GO:0000003,GO:0003006,GO:0003674,GO:0003700,GO:0006355,GO:0007275,GO:0008150,GO:0009790,GO:0009791,GO:0009793,GO:0009889,GO:0010154,GO:0010468,GO:0010556,GO:0019219,GO:0019222,GO:0022414,GO:0031323,GO:0031326,GO:0032501,GO:0032502,GO:0048316,GO:0048366,GO:0048367,GO:0048608,GO:0048731,GO:0048825,GO:0048827,GO:0048856,GO:0050789,GO:0050794,GO:0051171,GO:0051252,GO:0060255,GO:0061458,GO:0065007,GO:…	-	-	-	-	-	-	-	-	-	-	AP2	2
111	scaffold107371:63652-63876_0	37682.EMT05570	4.43e-21	85.1	COG0475@1|root,KOG1650@2759|Eukaryota	2759|Eukaryota	P	solute:proton antiporter activity	-	-	-	-	-	-	-	-	-	-	-	-	Na_H_Exchanger	2
112	scaffold107371:65666-66667_0	4113.PGSC0003DMT400085681	3.43e-153	443	COG0475@1|root,KOG1650@2759|Eukaryota,37HSQ@33090|Viridiplantae,3G7I6@35493|Streptophyta,44MWR@71274|asterids	35493|Streptophyta	P	) antiporter	-	GO:0005575,GO:0005622,GO:0005623,GO:0005737,GO:0005768,GO:0005770,GO:0005783,GO:0006605,GO:0006623,GO:0006810,GO:0006811,GO:0006812,GO:0006885,GO:0006886,GO:0007034,GO:0008104,GO:0008150,GO:0012505,GO:0015031,GO:0015672,GO:0015833,GO:0031410,GO:0031982,GO:0033036,GO:0033365,GO:0034613,GO:0042592,GO:0042886,GO:0043226,GO:0043227,GO:0043229,GO:0043231,GO:0044424,GO:0044444,GO:0044464,GO:0045184,GO:…	-	-	-	-	-	-	-	-	-	-	Na_H_Exchanger	2
113	scaffold107371:66745-68058_0	4432.XP_010260095.1	1.64e-132	409	COG0475@1|root,KOG1650@2759|Eukaryota,37HSQ@33090|Viridiplantae,3G7I6@35493|Streptophyta	35493|Streptophyta	P	cation H( ) antiporter	-	GO:0005575,GO:0005622,GO:0005623,GO:0005737,GO:0005783,GO:0006605,GO:0006623,GO:0006810,GO:0006811,GO:0006812,GO:0006873,GO:0006875,GO:0006885,GO:0006886,GO:0007034,GO:0008104,GO:0008150,GO:0009987,GO:0012505,GO:0015031,GO:0015672,GO:0015833,GO:0019725,GO:0030003,GO:0030004,GO:0030007,GO:0030104,GO:0033036,GO:0033365,GO:0034613,GO:0042592,GO:0042886,GO:0043226,GO:0043227,GO:0043229,GO:0043231,GO:…	-	-	-	-	-	-	-	-	-	-	Na_H_Exchanger	2
114	scaffold108163:51409-51616_0	4530.OS05T0578600-01	4.53e-25	101	COG5434@1|root,2QWCM@2759|Eukaryota,37SD7@33090|Viridiplantae,3GEWR@35493|Streptophyta,3KKVS@4447|Liliopsida,3I7S0@38820|Poales	35493|Streptophyta	G	Glycosyl hydrolases family 28	-	-	3.2.1.67	ko:K01213	ko00040,ko01100,map00040,map01100	M00081	R01982,R07413	RC00049	ko00000,ko00001,ko00002,ko01000	-	-	-	Glyco_hydro_28	2
115	scaffold108163:52972-53370_0	13333.ERN02396	9.28e-42	146	COG5434@1|root,2QWCM@2759|Eukaryota,37SD7@33090|Viridiplantae,3GEWR@35493|Streptophyta	35493|Streptophyta	G	Polygalacturonase	-	GO:0003674,GO:0003824,GO:0004553,GO:0004650,GO:0005575,GO:0005618,GO:0005623,GO:0008150,GO:0009664,GO:0009825,GO:0009827,GO:0009831,GO:0009987,GO:0016043,GO:0016049,GO:0016787,GO:0016798,GO:0030312,GO:0040007,GO:0042545,GO:0042547,GO:0044464,GO:0045229,GO:0071554,GO:0071555,GO:0071669,GO:0071840,GO:0071944	3.2.1.67	ko:K01213	ko00040,ko01100,map00040,map01100	M00081	R01982,R07413	RC00049	ko00000,ko00001,ko00002,ko01000	-	-	-	Glyco_hydro_28	2
116	scaffold108259:52022-52876_0	3988.XP_002534295.1	2.18e-23	102	28NJ9@1|root,2QV4V@2759|Eukaryota,37HRW@33090|Viridiplantae,3G93I@35493|Streptophyta,4JJZ1@91835|fabids	35493|Streptophyta	S	Plant protein of unknown function (DUF936)	-	-	-	-	-	-	-	-	-	-	-	-	DUF936	2
117	scaffold108259:58673-59705_0	3694.POPTR_0003s06780.1	1.29e-24	112	28NJ9@1|root,2QQJS@2759|Eukaryota,37QXI@33090|Viridiplantae,3GBFI@35493|Streptophyta,4JH8A@91835|fabids	35493|Streptophyta	S	Plant protein of unknown function (DUF936)	-	-	-	-	-	-	-	-	-	-	-	-	DUF936	2
118	scaffold10832:280805-281758_0	29760.VIT_11s0016g05800.t01	1.68e-15	83.2	2CNCB@1|root,2QV6C@2759|Eukaryota,37QJT@33090|Viridiplantae,3GGWJ@35493|Streptophyta	35493|Streptophyta	S	Rap1-interacting factor 1 N terminal	-	-	-	ko:K11138	ko04550,map04550	-	-	-	ko00000,ko00001,ko03032	-	-	-	Rif1_N	2
119	scaffold10832:285552-285767_0	3750.XP_008367925.1	3.27e-19	85.5	2CNCB@1|root,2QV6C@2759|Eukaryota,37QJT@33090|Viridiplantae,3GGWJ@35493|Streptophyta,4JIX5@91835|fabids	35493|Streptophyta	S	Rap1-interacting factor 1 N terminal	-	-	-	ko:K11138	ko04550,map04550	-	-	-	ko00000,ko00001,ko03032	-	-	-	Rif1_N	2
120	scaffold10832:287673-287849_0	3750.XP_008367925.1	3.07e-14	71.6	2CNCB@1|root,2QV6C@2759|Eukaryota,37QJT@33090|Viridiplantae,3GGWJ@35493|Streptophyta,4JIX5@91835|fabids	35493|Streptophyta	S	Rap1-interacting factor 1 N terminal	-	-	-	ko:K11138	ko04550,map04550	-	-	-	ko00000,ko00001,ko03032	-	-	-	Rif1_N	2
121	scaffold10832:288090-288239_0	3750.XP_008352236.1	2.58e-15	72.4	2CNCB@1|root,2QV6C@2759|Eukaryota,37QJT@33090|Viridiplantae,3GGWJ@35493|Streptophyta,4JIX5@91835|fabids	35493|Streptophyta	S	Rap1-interacting factor 1 N terminal	-	-	-	ko:K11138	ko04550,map04550	-	-	-	ko00000,ko00001,ko03032	-	-	-	Rif1_N	2
122	scaffold109188:50623-50763_0	4513.MLOC_20836.1	9.64e-13	63.5	KOG2992@1|root,KOG2992@2759|Eukaryota,388UR@33090|Viridiplantae,3GXIZ@35493|Streptophyta,3MAVU@4447|Liliopsida,3IUDR@38820|Poales	35493|Streptophyta	Y	box H/ACA snoRNA metabolic process	-	-	2.7.7.6	ko:K16251	-	-	-	-	br01611,ko00000,ko01000,ko03021	-	-	-	DUF3223	2
123	scaffold109560:218965-219215_0	3649.evm.model.supercontig_180.12	1.11e-45	152	COG5096@1|root,KOG1061@2759|Eukaryota,37NNV@33090|Viridiplantae,3GDR4@35493|Streptophyta,3HSTH@3699|Brassicales	35493|Streptophyta	U	Subunit of clathrin-associated adaptor protein complex that plays a role in protein sorting in the late-Golgi trans-Golgi network (TGN) and or endosomes. The AP complexes mediate both the recruitment of clathrin to membranes and the recognition of sorting signals within the cytosolic tails of transmembrane cargo molecules	-	GO:0005575,GO:0005623,GO:0005886,GO:0005911,GO:0009506,GO:0016020,GO:0030054,GO:0044464,GO:0055044,GO:0071944	-	ko:K12392	ko04142,map04142	-	-	-	ko00000,ko00001,ko04131	-	-	-	Adaptin_N,Alpha_adaptinC2,B2-adapt-app_C	2
124	scaffold109560:219409-219522_0	38727.Pavir.J17793.1.p	2.81e-20	84	COG5096@1|root,KOG1061@2759|Eukaryota,37NNV@33090|Viridiplantae,3GDR4@35493|Streptophyta,3KPPZ@4447|Liliopsida,3ICG1@38820|Poales	35493|Streptophyta	U	Subunit of clathrin-associated adaptor protein complex that plays a role in protein sorting in the late-Golgi trans-Golgi network (TGN) and or endosomes. The AP complexes mediate both the recruitment of clathrin to membranes and the recognition of sorting signals within the cytosolic tails of transmembrane cargo molecules	-	GO:0005575,GO:0005623,GO:0005886,GO:0005911,GO:0009506,GO:0016020,GO:0030054,GO:0044464,GO:0055044,GO:0071944	-	ko:K12392	ko04142,map04142	-	-	-	ko00000,ko00001,ko04131	-	-	-	Adaptin_N,Alpha_adaptinC2,B2-adapt-app_C	2
125	scaffold10975:44143-44681_0	4641.GSMUA_Achr3P29930_001	7.36e-09	62	28P6M@1|root,2QVTI@2759|Eukaryota,37MH1@33090|Viridiplantae,3GFC7@35493|Streptophyta,3KQ1U@4447|Liliopsida	35493|Streptophyta	-	-	-	-	-	-	-	-	-	-	-	-	-	-	-	2
126	scaffold10975:47598-48374_0	981085.XP_010104979.1	8.24e-81	256	28K4X@1|root,2QSJI@2759|Eukaryota,37MYG@33090|Viridiplantae,3GCXM@35493|Streptophyta,4JE2F@91835|fabids	35493|Streptophyta	S	protein trichome birefringence-like	-	GO:0003674,GO:0003824,GO:0005575,GO:0005622,GO:0005623,GO:0005737,GO:0005794,GO:0008150,GO:0008374,GO:0009987,GO:0012505,GO:0016407,GO:0016413,GO:0016740,GO:0016746,GO:0016747,GO:0043226,GO:0043227,GO:0043229,GO:0043231,GO:0044424,GO:0044444,GO:0044464,GO:0071554	-	-	-	-	-	-	-	-	-	-	PC-Esterase,PMR5N	2
127	scaffold110413:98227-100788_0	3218.PP1S543_6V6.1	1.32e-255	749	KOG4197@1|root,KOG4197@2759|Eukaryota,37KUJ@33090|Viridiplantae,3G9E6@35493|Streptophyta	35493|Streptophyta	IQ	Pentatricopeptide repeat-containing protein	-	-	-	-	-	-	-	-	-	-	-	-	DYW_deaminase,PPR,PPR_2	2
128	scaffold110564:442282-442713_0	57918.XP_004287367.1	9.89e-60	199	COG2124@1|root,KOG0157@2759|Eukaryota,37I60@33090|Viridiplantae,3GEDS@35493|Streptophyta,4JF0K@91835|fabids	35493|Streptophyta	Q	Cytochrome p450	-	GO:0003674,GO:0003824,GO:0004497,GO:0006629,GO:0008150,GO:0008152,GO:0008202,GO:0008395,GO:0009719,GO:0009725,GO:0009741,GO:0010033,GO:0010268,GO:0010817,GO:0014070,GO:0016128,GO:0016131,GO:0016491,GO:0033993,GO:0042221,GO:0042445,GO:0042592,GO:0044238,GO:0048878,GO:0050896,GO:0055088,GO:0055114,GO:0065007,GO:0065008,GO:0071704,GO:1901360,GO:1901615,GO:1901700	-	ko:K15639	ko00905,map00905	-	R09761,R09762	RC01216	ko00000,ko00001,ko00199,ko01000	-	-	-	p450	2
129	scaffold110564:442810-443197_0	4432.XP_010254323.1	1.15e-33	130	COG2124@1|root,KOG0157@2759|Eukaryota,37I60@33090|Viridiplantae,3GEDS@35493|Streptophyta	35493|Streptophyta	Q	Belongs to the cytochrome P450 family	-	GO:0003674,GO:0003824,GO:0004497,GO:0006629,GO:0008150,GO:0008152,GO:0008202,GO:0008395,GO:0009719,GO:0009725,GO:0009741,GO:0010033,GO:0010268,GO:0010817,GO:0014070,GO:0016128,GO:0016131,GO:0016491,GO:0033993,GO:0042221,GO:0042445,GO:0042592,GO:0044238,GO:0048878,GO:0050896,GO:0055088,GO:0055114,GO:0065007,GO:0065008,GO:0071704,GO:1901360,GO:1901615,GO:1901700	-	ko:K15639	ko00905,map00905	-	R09761,R09762	RC01216	ko00000,ko00001,ko00199,ko01000	-	-	-	p450	2
130	scaffold110564:443459-443703_0	218851.Aquca_086_00004.1	5.38e-10	60.5	COG2124@1|root,KOG0157@2759|Eukaryota,37IXF@33090|Viridiplantae,3G9DS@35493|Streptophyta	35493|Streptophyta	Q	Belongs to the cytochrome P450 family	-	-	-	ko:K10717,ko:K20660	ko00908,ko01100,ko01110,map00908,map01100,map01110	-	R08053,R08054,R08055	RC01137	ko00000,ko00001,ko00199	-	-	-	p450	2
131	scaffold110564:443817-444040_0	4565.Traes_7AL_90DFCB464.1	5.54e-24	92.4	COG2124@1|root,KOG0157@2759|Eukaryota,37I60@33090|Viridiplantae,3GEDS@35493|Streptophyta,3KXPZ@4447|Liliopsida,3I4GV@38820|Poales	35493|Streptophyta	Q	Belongs to the cytochrome P450 family	-	GO:0003674,GO:0003824,GO:0004497,GO:0006629,GO:0008150,GO:0008152,GO:0008202,GO:0010268,GO:0010817,GO:0016128,GO:0016131,GO:0016491,GO:0042445,GO:0042592,GO:0044238,GO:0048878,GO:0055088,GO:0055114,GO:0065007,GO:0065008,GO:0071704,GO:1901360,GO:1901615	-	ko:K15639	ko00905,map00905	-	R09761,R09762	RC01216	ko00000,ko00001,ko00199,ko01000	-	-	-	p450	2
132	scaffold110564:444150-444525_0	72658.Bostr.2199s0005.1.p	2.44e-21	92.4	COG2124@1|root,KOG0157@2759|Eukaryota,37I60@33090|Viridiplantae,3GEDS@35493|Streptophyta,3HR2U@3699|Brassicales	35493|Streptophyta	Q	cytochrome P450	-	GO:0003674,GO:0003824,GO:0004497,GO:0006629,GO:0008150,GO:0008152,GO:0008202,GO:0008395,GO:0009719,GO:0009725,GO:0009741,GO:0010033,GO:0010268,GO:0010817,GO:0014070,GO:0016128,GO:0016131,GO:0016491,GO:0033993,GO:0042221,GO:0042445,GO:0042592,GO:0044238,GO:0048878,GO:0050896,GO:0055088,GO:0055114,GO:0065007,GO:0065008,GO:0071704,GO:1901360,GO:1901615,GO:1901700	-	ko:K15639	ko00905,map00905	-	R09761,R09762	RC01216	ko00000,ko00001,ko00199,ko01000	-	-	-	p450	2
133	scaffold11078:74336-76083_0	218851.Aquca_033_00039.1	1.3e-104	333	KOG4197@1|root,KOG4197@2759|Eukaryota,37MAJ@33090|Viridiplantae,3G952@35493|Streptophyta	35493|Streptophyta	S	Pentatricopeptide repeat-containing protein	-	GO:0003674,GO:0003676,GO:0003723,GO:0003824,GO:0004518,GO:0004519,GO:0005488,GO:0005575,GO:0005622,GO:0005623,GO:0005737,GO:0005829,GO:0005840,GO:0006139,GO:0006725,GO:0006807,GO:0008150,GO:0008152,GO:0009451,GO:0009987,GO:0016070,GO:0016787,GO:0016788,GO:0022626,GO:0032991,GO:0034641,GO:0043170,GO:0043226,GO:0043227,GO:0043228,GO:0043229,GO:0043231,GO:0043232,GO:0043412,GO:0044237,GO:0044238,GO:…	-	-	-	-	-	-	-	-	-	-	PPR,PPR_1,PPR_2,PPR_3	2
134	scaffold111271:75108-75977_0	42345.XP_008783936.1	3.28e-136	401	COG2124@1|root,KOG0157@2759|Eukaryota,37JNT@33090|Viridiplantae,3G90U@35493|Streptophyta,3KRP1@4447|Liliopsida	35493|Streptophyta	Q	Belongs to the cytochrome P450 family	-	GO:0000249,GO:0003674,GO:0003824,GO:0006629,GO:0006694,GO:0008150,GO:0008152,GO:0008202,GO:0008610,GO:0009058,GO:0016125,GO:0016126,GO:0016491,GO:0016705,GO:0016717,GO:0044238,GO:0055114,GO:0070704,GO:0071704,GO:1901360,GO:1901362,GO:1901576,GO:1901615,GO:1901617	1.14.19.41	ko:K09832	ko00100,ko01100,ko01110,map00100,map01100,map01110	-	R07489,R11097	RC01886	ko00000,ko00001,ko00199,ko01000	-	-	-	p450	2
135	scaffold111271:76206-76502_0	3711.Bra021917.1-P	3.73e-41	139	COG2124@1|root,KOG0157@2759|Eukaryota,37JNT@33090|Viridiplantae,3G90U@35493|Streptophyta,3HNZ6@3699|Brassicales	35493|Streptophyta	Q	cytochrome p450	-	GO:0000249,GO:0003674,GO:0003824,GO:0006629,GO:0006694,GO:0008150,GO:0008152,GO:0008202,GO:0008610,GO:0009058,GO:0016125,GO:0016126,GO:0016491,GO:0016705,GO:0016717,GO:0044238,GO:0055114,GO:0070704,GO:0071704,GO:1901360,GO:1901362,GO:1901576,GO:1901615,GO:1901617	1.14.19.41	ko:K09832	ko00100,ko01100,ko01110,map00100,map01100,map01110	-	R07489,R11097	RC01886	ko00000,ko00001,ko00199,ko01000	-	-	-	p450	2
136	scaffold112539:126186-126386_0	3983.cassava4.1_013422m	1.05e-17	81.3	COG0693@1|root,KOG2764@2759|Eukaryota,37JAT@33090|Viridiplantae,3G8PR@35493|Streptophyta,4JGSN@91835|fabids	35493|Streptophyta	V	DJ-1/PfpI family	-	GO:0005575,GO:0005622,GO:0005623,GO:0005737,GO:0006996,GO:0008150,GO:0009507,GO:0009536,GO:0009657,GO:0009658,GO:0009987,GO:0016043,GO:0043226,GO:0043227,GO:0043229,GO:0043231,GO:0044424,GO:0044444,GO:0044464,GO:0071840	3.5.1.124	ko:K03152	-	-	-	-	ko00000,ko01000,ko01002	-	-	-	DJ-1_PfpI	2
137	scaffold112539:127043-127249_0	90675.XP_010487315.1	2.03e-15	72.4	COG0693@1|root,KOG2764@2759|Eukaryota,37K07@33090|Viridiplantae,3GBGN@35493|Streptophyta,3HW0P@3699|Brassicales	35493|Streptophyta	V	Protein DJ-1 homolog	-	GO:0003674,GO:0003824,GO:0005575,GO:0005622,GO:0005623,GO:0005634,GO:0005737,GO:0005773,GO:0005774,GO:0005829,GO:0005886,GO:0005911,GO:0006081,GO:0006082,GO:0006089,GO:0008150,GO:0008152,GO:0009056,GO:0009058,GO:0009438,GO:0009506,GO:0009987,GO:0010035,GO:0010038,GO:0016020,GO:0016053,GO:0016829,GO:0016835,GO:0016836,GO:0019172,GO:0019249,GO:0019752,GO:0030054,GO:0031090,GO:0032787,GO:0042180,GO:…	3.5.1.124	ko:K03152	-	-	-	-	ko00000,ko01000,ko01002	-	-	-	DJ-1_PfpI	2
138	scaffold112716:13563-13681_0	218851.Aquca_010_00096.1	3.25e-14	68.9	COG0534@1|root,KOG1347@2759|Eukaryota,37M3D@33090|Viridiplantae,3G7HK@35493|Streptophyta	35493|Streptophyta	B	Belongs to the multi antimicrobial extrusion (MATE) (TC 2.A.66.1) family	-	GO:0003674,GO:0005215,GO:0006810,GO:0006855,GO:0008150,GO:0015238,GO:0015893,GO:0022857,GO:0042221,GO:0042493,GO:0050896,GO:0051179,GO:0051234,GO:0055085	-	ko:K03327	-	-	-	-	ko00000,ko02000	2.A.66.1	-	-	MatE	2
139	scaffold112716:14694-14932_0	4513.MLOC_77802.1	6.12e-21	88.2	COG0534@1|root,KOG1347@2759|Eukaryota,37M3D@33090|Viridiplantae,3G7HK@35493|Streptophyta,3KWAW@4447|Liliopsida,3I3JG@38820|Poales	35493|Streptophyta	V	Belongs to the multi antimicrobial extrusion (MATE) (TC 2.A.66.1) family	-	GO:0003674,GO:0005215,GO:0006810,GO:0006855,GO:0008150,GO:0015238,GO:0015893,GO:0022857,GO:0042221,GO:0042493,GO:0050896,GO:0051179,GO:0051234,GO:0055085	-	ko:K03327	-	-	-	-	ko00000,ko02000	2.A.66.1	-	-	MatE	2
140	scaffold112716:15368-15909_0	3641.EOX91987	4.88e-73	234	COG0534@1|root,KOG1347@2759|Eukaryota,37M3D@33090|Viridiplantae,3G7HK@35493|Streptophyta	35493|Streptophyta	B	Belongs to the multi antimicrobial extrusion (MATE) (TC 2.A.66.1) family	-	GO:0003674,GO:0005215,GO:0006810,GO:0006855,GO:0008150,GO:0015238,GO:0015893,GO:0022857,GO:0042221,GO:0042493,GO:0050896,GO:0051179,GO:0051234,GO:0055085	-	ko:K03327	-	-	-	-	ko00000,ko02000	2.A.66.1	-	-	MatE	2
141	scaffold112716:16093-16371_0	37682.EMT23905	3.94e-22	89.4	COG0534@1|root,KOG1347@2759|Eukaryota,37M3D@33090|Viridiplantae,3G7HK@35493|Streptophyta,3KRC4@4447|Liliopsida,3I879@38820|Poales	35493|Streptophyta	V	Belongs to the multi antimicrobial extrusion (MATE) (TC 2.A.66.1) family	-	GO:0003674,GO:0005215,GO:0006810,GO:0006855,GO:0008150,GO:0015238,GO:0015893,GO:0022857,GO:0042221,GO:0042493,GO:0050896,GO:0051179,GO:0051234,GO:0055085	-	ko:K03327	-	-	-	-	ko00000,ko02000	2.A.66.1	-	-	MatE	2
142	scaffold113099:96437-96990_0	4641.GSMUA_Achr10P13850_001	8.93e-53	184	COG3104@1|root,KOG1237@2759|Eukaryota,37IEX@33090|Viridiplantae,3G7JK@35493|Streptophyta,3KSW4@4447|Liliopsida	35493|Streptophyta	E	Peptide transporter	-	-	-	ko:K14638	-	-	-	-	ko00000,ko02000	2.A.17.3	-	-	PTR2	2
143	scaffold113099:97174-97855_0	13333.ERN12019	4.01e-87	276	COG3104@1|root,KOG1237@2759|Eukaryota,37P0E@33090|Viridiplantae,3G7FY@35493|Streptophyta	35493|Streptophyta	E	Protein NRT1 PTR FAMILY	-	GO:0005575,GO:0005623,GO:0005886,GO:0016020,GO:0044464,GO:0071944	-	ko:K14638	-	-	-	-	ko00000,ko02000	2.A.17.3	-	-	PTR2	2
144	scaffold113212:76389-76757_0	2711.XP_006490220.1	8.3e-11	64.7	COG3491@1|root,KOG0143@2759|Eukaryota,37HXI@33090|Viridiplantae,3G7DT@35493|Streptophyta	35493|Streptophyta	Q	Belongs to the iron ascorbate-dependent oxidoreductase family	-	GO:0001101,GO:0002229,GO:0002239,GO:0006082,GO:0006725,GO:0006950,GO:0006952,GO:0007275,GO:0007568,GO:0008150,GO:0008152,GO:0009056,GO:0009605,GO:0009607,GO:0009617,GO:0009620,GO:0009696,GO:0009719,GO:0009725,GO:0009751,GO:0009987,GO:0010033,GO:0010150,GO:0010817,GO:0014070,GO:0016054,GO:0016999,GO:0017001,GO:0017144,GO:0018958,GO:0019336,GO:0019439,GO:0019752,GO:0032501,GO:0032502,GO:0032787,GO:…	-	-	-	-	-	-	-	-	-	-	2OG-FeII_Oxy,DIOX_N	2
145	scaffold113212:79241-79488_0	4565.Traes_2BL_781BA1506.1	2.34e-31	114	COG3491@1|root,KOG0143@2759|Eukaryota,37MCR@33090|Viridiplantae,3G9A4@35493|Streptophyta,3KSXG@4447|Liliopsida,3I8KQ@38820|Poales	35493|Streptophyta	Q	Belongs to the iron ascorbate-dependent oxidoreductase family	-	-	-	-	-	-	-	-	-	-	-	-	2OG-FeII_Oxy,DIOX_N	2
146	scaffold113212:79586-79907_0	3750.XP_008356982.1	1.17e-51	170	COG3491@1|root,KOG0143@2759|Eukaryota,37HXI@33090|Viridiplantae,3G7DT@35493|Streptophyta,4JF9B@91835|fabids	35493|Streptophyta	Q	Belongs to the iron ascorbate-dependent oxidoreductase family	-	-	-	-	-	-	-	-	-	-	-	-	2OG-FeII_Oxy,DIOX_N	2
147	scaffold113212:80151-80361_0	13333.ERM96630	2.58e-22	92.8	COG3491@1|root,KOG0143@2759|Eukaryota,37HXI@33090|Viridiplantae,3G7DT@35493|Streptophyta	35493|Streptophyta	Q	Belongs to the iron ascorbate-dependent oxidoreductase family	-	GO:0001101,GO:0002229,GO:0002239,GO:0006082,GO:0006725,GO:0006950,GO:0006952,GO:0007275,GO:0007568,GO:0008150,GO:0008152,GO:0009056,GO:0009605,GO:0009607,GO:0009617,GO:0009620,GO:0009696,GO:0009719,GO:0009725,GO:0009751,GO:0009987,GO:0010033,GO:0010150,GO:0010817,GO:0014070,GO:0016054,GO:0016999,GO:0017001,GO:0017144,GO:0018958,GO:0019336,GO:0019439,GO:0019752,GO:0032501,GO:0032502,GO:0032787,GO:…	-	-	-	-	-	-	-	-	-	-	2OG-FeII_Oxy,DIOX_N	2
148	scaffold113892:114922-117377_0	4513.MLOC_67933.1	3.41e-43	177	28JVX@1|root,2QSA1@2759|Eukaryota,37IVU@33090|Viridiplantae,3G7Y2@35493|Streptophyta,3KSWN@4447|Liliopsida,3I7NM@38820|Poales	35493|Streptophyta	S	N-terminal C2 in EEIG1 and EHBP1 proteins	-	GO:0005575,GO:0005622,GO:0005623,GO:0005737,GO:0005829,GO:0005886,GO:0006810,GO:0006928,GO:0006950,GO:0006970,GO:0006996,GO:0007097,GO:0008150,GO:0009314,GO:0009416,GO:0009628,GO:0009637,GO:0009657,GO:0009658,GO:0009787,GO:0009902,GO:0009903,GO:0009966,GO:0009987,GO:0010029,GO:0010646,GO:0016020,GO:0016043,GO:0019750,GO:0023051,GO:0030029,GO:0030048,GO:0030705,GO:0031022,GO:0042592,GO:0044424,GO:…	-	-	-	-	-	-	-	-	-	-	NT-C2	2
149	scaffold11417:273839-274057_0	3847.GLYMA14G34740.1	3.42e-12	65.1	KOG0819@1|root,KOG0819@2759|Eukaryota,37MVS@33090|Viridiplantae,3G8BH@35493|Streptophyta,4JKR3@91835|fabids	35493|Streptophyta	U	Annexin D1-like	-	-	-	ko:K17098	-	-	-	-	ko00000	1.A.31.1.5	-	-	Annexin	2
150	scaffold11417:274153-274371_0	71139.XP_010032317.1	1.37e-18	84.7	KOG0819@1|root,KOG0819@2759|Eukaryota,37I10@33090|Viridiplantae,3GDQJ@35493|Streptophyta	35493|Streptophyta	U	Annexin-like protein RJ4	-	-	-	ko:K17098	-	-	-	-	ko00000	1.A.31.1.5	-	-	Annexin	2
151	scaffold114836:142576-142696_0	13333.ERM98473	3.31e-12	63.5	2AJ5U@1|root,2RZ6A@2759|Eukaryota,37UZR@33090|Viridiplantae,3GITK@35493|Streptophyta	35493|Streptophyta	-	-	-	-	-	-	-	-	-	-	-	-	-	-	Rep_fac-A_C	2
152	scaffold114839:14719-17055_0	59689.fgenesh2_kg.7__2583__AT4G17250.1	1.09e-93	306	28Q85@1|root,2QWWX@2759|Eukaryota,37N9N@33090|Viridiplantae,3GH2S@35493|Streptophyta,3HNS6@3699|Brassicales	35493|Streptophyta	-	-	-	-	-	-	-	-	-	-	-	-	-	-	-	2
153	scaffold115222:125644-128272_1	4641.GSMUA_Achr1P03000_001	6.91e-08	65.1	COG4886@1|root,KOG0619@2759|Eukaryota,37SV2@33090|Viridiplantae,3GACT@35493|Streptophyta	35493|Streptophyta	J	LRR receptor-like serine threonine-protein kinase	-	GO:0000003,GO:0001704,GO:0001706,GO:0003002,GO:0003006,GO:0003674,GO:0003824,GO:0004672,GO:0004674,GO:0004675,GO:0004888,GO:0005575,GO:0005618,GO:0005623,GO:0005886,GO:0006464,GO:0006468,GO:0006793,GO:0006796,GO:0006807,GO:0006810,GO:0006833,GO:0006950,GO:0007154,GO:0007165,GO:0007166,GO:0007167,GO:0007178,GO:0007275,GO:0007369,GO:0007389,GO:0007492,GO:0008104,GO:0008150,GO:0008152,GO:0009505,GO:…	-	-	-	-	-	-	-	-	-	-	LRRNT_2,LRR_1,LRR_6,LRR_8	2
154	scaffold115222:125644-128272_0	29760.VIT_14s0068g02240.t01	2.89e-28	131	COG4886@1|root,KOG0619@2759|Eukaryota,37JQI@33090|Viridiplantae,3G97Z@35493|Streptophyta	35493|Streptophyta	Q	LRR receptor-like serine threonine-protein kinase	-	GO:0000003,GO:0001704,GO:0001706,GO:0003006,GO:0005575,GO:0005618,GO:0005623,GO:0005886,GO:0006810,GO:0006833,GO:0006950,GO:0007275,GO:0007369,GO:0007389,GO:0007492,GO:0008104,GO:0008150,GO:0009505,GO:0009531,GO:0009611,GO:0009653,GO:0009790,GO:0009791,GO:0009793,GO:0009798,GO:0009888,GO:0009987,GO:0010154,GO:0010453,GO:0010470,GO:0016020,GO:0022414,GO:0022603,GO:0030104,GO:0030154,GO:0030312,GO:…	2.4.2.9	ko:K00761	ko00240,ko01100,map00240,map01100	-	R00966	RC00063	ko00000,ko00001,ko01000	-	-	-	LRRNT_2,LRR_1,LRR_6,LRR_8	2
155	scaffold115950:44854-44972_0	3983.cassava4.1_017619m	8.8e-13	65.1	COG0589@1|root,2RYTA@2759|Eukaryota,37UMZ@33090|Viridiplantae,3GIN4@35493|Streptophyta,4JPGI@91835|fabids	35493|Streptophyta	T	Universal stress protein A-like protein	-	GO:0000166,GO:0003674,GO:0005488,GO:0005575,GO:0005623,GO:0005886,GO:0008144,GO:0016020,GO:0016208,GO:0017076,GO:0030554,GO:0032553,GO:0032555,GO:0032559,GO:0036094,GO:0043167,GO:0043168,GO:0043169,GO:0044464,GO:0071944,GO:0097159,GO:0097367,GO:1901265,GO:1901363	-	-	-	-	-	-	-	-	-	-	Usp	2
156	scaffold115950:45255-45711_0	13333.ERN03090	3.72e-10	62.4	COG0589@1|root,2RYTA@2759|Eukaryota,37UMZ@33090|Viridiplantae,3GIN4@35493|Streptophyta	35493|Streptophyta	T	Universal stress protein A-like protein	-	GO:0000166,GO:0003674,GO:0005488,GO:0005575,GO:0005623,GO:0005886,GO:0008144,GO:0016020,GO:0016208,GO:0017076,GO:0030554,GO:0032553,GO:0032555,GO:0032559,GO:0036094,GO:0043167,GO:0043168,GO:0043169,GO:0044464,GO:0071944,GO:0097159,GO:0097367,GO:1901265,GO:1901363	-	-	-	-	-	-	-	-	-	-	Usp	2
157	scaffold11633:116853-117619_0	4155.Migut.H02126.1.p	2.71e-70	238	COG0515@1|root,2QUNW@2759|Eukaryota,37QDN@33090|Viridiplantae,3GFYS@35493|Streptophyta,44CHQ@71274|asterids	35493|Streptophyta	T	G-type lectin S-receptor-like serine threonine-protein kinase	-	-	-	-	-	-	-	-	-	-	-	-	B_lectin,PAN_2,Pkinase,S_locus_glycop	2
158	scaffold116801:25732-26898_0	13333.ERN10173	1.16e-243	697	COG0567@1|root,KOG0450@2759|Eukaryota,37MIR@33090|Viridiplantae,3GGCN@35493|Streptophyta	35493|Streptophyta	C	2-oxoglutarate dehydrogenase	-	GO:0003674,GO:0003824,GO:0004591,GO:0005575,GO:0005622,GO:0005623,GO:0005737,GO:0005739,GO:0005759,GO:0005947,GO:0006082,GO:0006091,GO:0006099,GO:0006101,GO:0008150,GO:0008152,GO:0009060,GO:0009353,GO:0009987,GO:0015980,GO:0016491,GO:0016624,GO:0016903,GO:0016999,GO:0017144,GO:0019752,GO:0030062,GO:0031974,GO:0032991,GO:0043226,GO:0043227,GO:0043229,GO:0043231,GO:0043233,GO:0043436,GO:0044237,GO:…	1.2.4.2	ko:K00164	ko00020,ko00310,ko00380,ko01100,ko01110,ko01120,ko01130,ko01200,map00020,map00310,map00380,map01100,map01110,map01120,map01130,map01200	M00009,M00011,M00032	R00621,R01933,R01940,R03316,R08549	RC00004,RC00027,RC00627,RC02743,RC02833,RC02883	br01601,ko00000,ko00001,ko00002,ko01000	-	-	-	2-oxogl_dehyd_N,E1_dh,OxoGdeHyase_C,Transket_pyr	2
159	scaffold116801:27596-27934_0	4006.Lus10005961	1.81e-31	119	COG0567@1|root,KOG0450@2759|Eukaryota,37MIR@33090|Viridiplantae,3GGCN@35493|Streptophyta,4JFA4@91835|fabids	35493|Streptophyta	C	2-oxoglutarate dehydrogenase	-	GO:0003674,GO:0003824,GO:0004591,GO:0005575,GO:0005622,GO:0005623,GO:0005737,GO:0005739,GO:0005759,GO:0005947,GO:0006082,GO:0006091,GO:0006099,GO:0006101,GO:0008150,GO:0008152,GO:0009060,GO:0009353,GO:0009987,GO:0015980,GO:0016491,GO:0016624,GO:0016903,GO:0016999,GO:0017144,GO:0019752,GO:0030062,GO:0031974,GO:0032991,GO:0043226,GO:0043227,GO:0043229,GO:0043231,GO:0043233,GO:0043436,GO:0044237,GO:…	1.2.4.2	ko:K00164	ko00020,ko00310,ko00380,ko01100,ko01110,ko01120,ko01130,ko01200,map00020,map00310,map00380,map01100,map01110,map01120,map01130,map01200	M00009,M00011,M00032	R00621,R01933,R01940,R03316,R08549	RC00004,RC00027,RC00627,RC02743,RC02833,RC02883	br01601,ko00000,ko00001,ko00002,ko01000	-	-	-	2-oxogl_dehyd_N,E1_dh,OxoGdeHyase_C,Transket_pyr	2
160	scaffold118186:23652-24736_0	13333.ERN06879	8.2e-76	249	COG0657@1|root,KOG1515@2759|Eukaryota,37N4P@33090|Viridiplantae,3GEM0@35493|Streptophyta	35493|Streptophyta	V	Carboxylesterase	-	GO:0003674,GO:0003824,GO:0008150,GO:0008152,GO:0009056,GO:0016787	-	-	-	-	-	-	-	-	-	-	Abhydrolase_3	2
161	scaffold118773:13471-13661_0	38727.Pavir.Ia04098.1.p	6.28e-18	81.6	COG0659@1|root,KOG0236@2759|Eukaryota,37RGN@33090|Viridiplantae,3GDYS@35493|Streptophyta,3KU4K@4447|Liliopsida,3IFQP@38820|Poales	35493|Streptophyta	P	Sulfate transporter	-	-	-	ko:K17470,ko:K17471	-	-	-	-	ko00000,ko02000	2.A.53.1	-	-	STAS,Sulfate_transp	2
162	scaffold118773:13764-14050_0	3656.XP_008451304.1	2.85e-34	126	COG0659@1|root,KOG0236@2759|Eukaryota,37IZZ@33090|Viridiplantae,3G7T0@35493|Streptophyta,4JM0E@91835|fabids	35493|Streptophyta	P	Sulfate transporter 3.1-like	-	GO:0003674,GO:0005215,GO:0005575,GO:0005622,GO:0005623,GO:0005737,GO:0005886,GO:0005887,GO:0006810,GO:0006811,GO:0006820,GO:0008150,GO:0008272,GO:0008509,GO:0009507,GO:0009536,GO:0015075,GO:0015103,GO:0015116,GO:0015318,GO:0015698,GO:0016020,GO:0016021,GO:0022857,GO:0031224,GO:0031226,GO:0034220,GO:0043226,GO:0043227,GO:0043229,GO:0043231,GO:0044424,GO:0044425,GO:0044444,GO:0044459,GO:0044464,GO:…	-	ko:K17470,ko:K17471	-	-	-	-	ko00000,ko02000	2.A.53.1	-	-	STAS,Sulfate_transp	2
163	scaffold118773:14366-14492_0	102107.XP_008246206.1	9.66e-13	64.7	COG0659@1|root,KOG0236@2759|Eukaryota,37NJ2@33090|Viridiplantae,3G812@35493|Streptophyta,4JNRT@91835|fabids	35493|Streptophyta	P	Sulfate transporter	-	GO:0003674,GO:0005215,GO:0005575,GO:0005623,GO:0005886,GO:0005887,GO:0006810,GO:0006811,GO:0006820,GO:0008150,GO:0008272,GO:0008509,GO:0015075,GO:0015103,GO:0015116,GO:0015318,GO:0015698,GO:0016020,GO:0016021,GO:0022857,GO:0031224,GO:0031226,GO:0034220,GO:0044425,GO:0044459,GO:0044464,GO:0051179,GO:0051234,GO:0055085,GO:0071944,GO:0072348,GO:0098656,GO:0098660,GO:0098661,GO:1901682,GO:1902358	-	ko:K17469	-	-	-	-	ko00000,ko02000	2.A.53.1	-	-	STAS,Sulfate_transp	2
164	scaffold118773:16580-16751_0	3847.GLYMA15G16680.1	2.57e-14	70.5	COG0659@1|root,KOG0236@2759|Eukaryota,37NJ2@33090|Viridiplantae,3G812@35493|Streptophyta,4JNRT@91835|fabids	35493|Streptophyta	P	Sulfate transporter	-	GO:0003674,GO:0005215,GO:0005575,GO:0005623,GO:0005886,GO:0005887,GO:0006810,GO:0006811,GO:0006820,GO:0008150,GO:0008272,GO:0008509,GO:0015075,GO:0015103,GO:0015116,GO:0015318,GO:0015698,GO:0016020,GO:0016021,GO:0022857,GO:0031224,GO:0031226,GO:0034220,GO:0044425,GO:0044459,GO:0044464,GO:0051179,GO:0051234,GO:0055085,GO:0071944,GO:0072348,GO:0098656,GO:0098660,GO:0098661,GO:1901682,GO:1902358	-	ko:K17469	-	-	-	-	ko00000,ko02000	2.A.53.1	-	-	STAS,Sulfate_transp	2
165	scaffold118827:138409-138691_0	4565.Traes_3B_0D7D0C36B.1	1.28e-16	75.9	COG5126@1|root,KOG0028@2759|Eukaryota,37VE8@33090|Viridiplantae,3GJAT@35493|Streptophyta,3M10Y@4447|Liliopsida,3IIQM@38820|Poales	35493|Streptophyta	DZ	EF-hand domain pair	-	-	-	ko:K10840,ko:K16465	ko03420,map03420	-	-	-	ko00000,ko00001,ko03036,ko03400	-	-	-	EF-hand_8	2
166	scaffold118827:66038-66243_0	161934.XP_010667966.1	4.1e-14	68.6	COG5126@1|root,KOG0028@2759|Eukaryota,37VKD@33090|Viridiplantae,3GJFJ@35493|Streptophyta	35493|Streptophyta	DZ	Calcium-binding protein PBP1-like	-	-	-	ko:K16465	-	-	-	-	ko00000,ko03036	-	-	-	EF-hand_8	2
167	scaffold119094:68388-69586_0	4155.Migut.F00229.1.p	1.41e-179	528	KOG4197@1|root,KOG4197@2759|Eukaryota,37STF@33090|Viridiplantae,3GC6V@35493|Streptophyta,44FPE@71274|asterids	35493|Streptophyta	S	DYW family of nucleic acid deaminases	-	-	-	-	-	-	-	-	-	-	-	-	DYW_deaminase,PPR,PPR_2,PPR_3	2
168	scaffold119094:69755-70991_0	218851.Aquca_013_00111.1	2.27e-89	295	KOG4197@1|root,KOG4197@2759|Eukaryota,37STF@33090|Viridiplantae,3GC6V@35493|Streptophyta	35493|Streptophyta	T	Pentatricopeptide repeat-containing protein At3g49170	-	GO:0000003,GO:0003006,GO:0003674,GO:0003676,GO:0003723,GO:0003824,GO:0004518,GO:0004519,GO:0005488,GO:0005575,GO:0005622,GO:0005623,GO:0006139,GO:0006725,GO:0006807,GO:0007275,GO:0008150,GO:0008152,GO:0009451,GO:0009790,GO:0009791,GO:0009793,GO:0009987,GO:0010154,GO:0016070,GO:0016787,GO:0016788,GO:0022414,GO:0032501,GO:0032502,GO:0034641,GO:0043170,GO:0043226,GO:0043227,GO:0043229,GO:0043231,GO:…	-	-	-	-	-	-	-	-	-	-	DYW_deaminase,PPR,PPR_2	2
169	scaffold11940:167249-167551_0	3983.cassava4.1_009420m	8.43e-22	95.1	COG0553@1|root,KOG1000@2759|Eukaryota,37I6N@33090|Viridiplantae,3GCK6@35493|Streptophyta,4JKPG@91835|fabids	35493|Streptophyta	L	DNA annealing helicase and endonuclease	-	GO:0000018,GO:0000228,GO:0000733,GO:0003674,GO:0003676,GO:0003824,GO:0004518,GO:0004519,GO:0004520,GO:0004536,GO:0005488,GO:0005515,GO:0005575,GO:0005622,GO:0005623,GO:0005634,GO:0005657,GO:0005694,GO:0006139,GO:0006259,GO:0006260,GO:0006261,GO:0006275,GO:0006281,GO:0006725,GO:0006807,GO:0006950,GO:0006974,GO:0006996,GO:0008150,GO:0008152,GO:0008156,GO:0009058,GO:0009059,GO:0009314,GO:0009411,GO:…	3.6.4.12	ko:K14440	-	-	-	-	ko00000,ko01000,ko03036	-	-	-	HNH,Helicase_C,SNF2_N	2
170	scaffold11940:167688-167875_0	4565.Traes_2AS_0D5A7E674.1	2.05e-17	80.5	COG0553@1|root,KOG1000@2759|Eukaryota,37I6N@33090|Viridiplantae,3GCK6@35493|Streptophyta,3KMKV@4447|Liliopsida	35493|Streptophyta	B	HNH nucleases	-	GO:0000018,GO:0000228,GO:0000733,GO:0003674,GO:0003676,GO:0003824,GO:0004518,GO:0004519,GO:0004520,GO:0004536,GO:0005488,GO:0005515,GO:0005575,GO:0005622,GO:0005623,GO:0005634,GO:0005657,GO:0005694,GO:0006139,GO:0006259,GO:0006260,GO:0006261,GO:0006275,GO:0006281,GO:0006725,GO:0006807,GO:0006950,GO:0006974,GO:0006996,GO:0008150,GO:0008152,GO:0008156,GO:0009058,GO:0009059,GO:0009314,GO:0009411,GO:…	3.6.4.12	ko:K14440	-	-	-	-	ko00000,ko01000,ko03036	-	-	-	HNH,Helicase_C,SNF2_N	2
171	scaffold120035:123627-124856_0	4006.Lus10026551	9.01e-211	593	KOG2532@1|root,KOG2532@2759|Eukaryota,37KTN@33090|Viridiplantae,3GF63@35493|Streptophyta,4JH8H@91835|fabids	35493|Streptophyta	G	anion transporter	-	GO:0003674,GO:0005215,GO:0005315,GO:0005575,GO:0005622,GO:0005623,GO:0005737,GO:0005794,GO:0006810,GO:0006811,GO:0006820,GO:0008150,GO:0009536,GO:0009605,GO:0009607,GO:0009624,GO:0012505,GO:0015291,GO:0015318,GO:0016020,GO:0016021,GO:0022804,GO:0022857,GO:0031224,GO:0034220,GO:0043207,GO:0043226,GO:0043227,GO:0043229,GO:0043231,GO:0044424,GO:0044425,GO:0044444,GO:0044464,GO:0050896,GO:0051179,GO:…	-	ko:K08193	-	-	-	-	ko00000,ko02000	2.A.1.14	-	-	MFS_1	2
172	scaffold120587:111379-111519_0	3649.evm.model.supercontig_628.1	4.23e-15	68.2	COG2124@1|root,KOG0157@2759|Eukaryota	2759|Eukaryota	Q	iron ion binding	-	-	1.14.13.112,1.14.13.201,1.14.13.79,1.14.13.93	ko:K04123,ko:K07437,ko:K09587,ko:K09588,ko:K09590,ko:K09843,ko:K12637,ko:K12638,ko:K12639,ko:K20667	ko00830,ko00904,ko00905,ko00906,ko01100,ko01110,map00830,map00904,map00905,map00906,map01100,map01110	M00371	R06294,R06295,R06296,R06297,R07202,R07430,R07431,R07445,R07448,R07450,R07451,R07452,R07453,R07454,R07455,R07457,R07458,R07786,R07787,R07791,R07792,R08390,R08392,R10067,R10669	RC00154,RC00257,RC00613,RC00661,RC00723,RC00724,RC00773,RC01218,RC01453,RC01622,RC02078,RC02079,RC03041	ko00000,ko00001,ko00002,ko00199,ko01000	-	-	-	Lipoxygenase,p450	2
173	scaffold120587:111625-111743_0	3649.evm.model.supercontig_628.2	2.77e-12	61.6	COG2124@1|root,KOG0157@2759|Eukaryota,37R7U@33090|Viridiplantae,3GF5P@35493|Streptophyta,3HX3P@3699|Brassicales	35493|Streptophyta	Q	cytochrome P450	-	-	-	-	-	-	-	-	-	-	-	-	p450	2
174	scaffold120587:112898-113137_0	3988.XP_002525487.1	4.07e-18	83.2	COG2124@1|root,KOG0157@2759|Eukaryota,37R7U@33090|Viridiplantae,3GF5P@35493|Streptophyta,4JJD9@91835|fabids	35493|Streptophyta	Q	Belongs to the cytochrome P450 family	-	-	-	-	-	-	-	-	-	-	-	-	p450	2
175	scaffold120587:113305-113454_0	3649.evm.model.supercontig_628.3	1.51e-13	68.6	COG2124@1|root,KOG0157@2759|Eukaryota,37R7U@33090|Viridiplantae,3GF5P@35493|Streptophyta,3HX3P@3699|Brassicales	35493|Streptophyta	Q	cytochrome P450	-	-	-	-	-	-	-	-	-	-	-	-	p450	2
176	scaffold120587:113553-113874_0	85681.XP_006441491.1	3.3e-36	135	COG2124@1|root,KOG0157@2759|Eukaryota,37R7U@33090|Viridiplantae,3GF5P@35493|Streptophyta	35493|Streptophyta	Q	Belongs to the cytochrome P450 family	-	-	-	-	-	-	-	-	-	-	-	-	p450	2
177	scaffold12135:199245-200258_0	38727.Pavir.J34941.1.p	1.03e-163	486	COG0474@1|root,KOG0205@2759|Eukaryota,37I59@33090|Viridiplantae,3GG2J@35493|Streptophyta,3KXRV@4447|Liliopsida,3I95W@38820|Poales	35493|Streptophyta	P	export across plasma membrane	-	GO:0005575,GO:0005623,GO:0005886,GO:0016020,GO:0044464,GO:0071944	3.6.3.6	ko:K01535	ko00190,map00190	-	-	-	ko00000,ko00001,ko01000	3.A.3.3	-	-	Cation_ATPase_N,E1-E2_ATPase,Hydrolase	2
178	scaffold122099:125137-125345_0	3649.evm.model.supercontig_27.68	2.38e-12	63.5	COG0515@1|root,KOG1187@2759|Eukaryota	2759|Eukaryota	KLT	protein serine/threonine kinase activity	-	-	2.7.11.1	ko:K04733	ko04010,ko04064,ko04620,ko04621,ko04624,ko04722,ko05133,ko05140,ko05142,ko05145,ko05152,ko05162,ko05164,map04010,map04064,map04620,map04621,map04624,map04722,map05133,map05140,map05142,map05145,map05152,map05162,map05164	M00686	-	-	ko00000,ko00001,ko00002,ko01000,ko01001	-	-	-	GUB_WAK_bind,Pkinase,Pkinase_Tyr,WAK_assoc	2
179	scaffold122099:125459-125585_0	4577.GRMZM2G459224_P01	2.19e-13	65.9	29RRD@1|root,2RXBX@2759|Eukaryota,37QXC@33090|Viridiplantae,3GG63@35493|Streptophyta,3KRWH@4447|Liliopsida,3I7NH@38820|Poales	35493|Streptophyta	T	Belongs to the protein kinase superfamily. Ser Thr protein kinase family	-	-	-	-	-	-	-	-	-	-	-	-	LRRNT_2,LRR_8,Pkinase,Pkinase_Tyr	2
180	scaffold122099:125888-126045_0	90675.XP_010438447.1	1.3e-15	72.4	COG0515@1|root,2QQCZ@2759|Eukaryota,37PZK@33090|Viridiplantae,3GA01@35493|Streptophyta	35493|Streptophyta	T	receptor-like serine threonine-protein kinase	-	-	-	-	-	-	-	-	-	-	-	-	LRR_8,Malectin_like,Pkinase,Pkinase_Tyr	2
181	scaffold122780:117360-119037_0	3218.PP1S183_52V6.1	1.5e-161	495	KOG4197@1|root,KOG4197@2759|Eukaryota,37KUJ@33090|Viridiplantae,3G9E6@35493|Streptophyta	35493|Streptophyta	IQ	Pentatricopeptide repeat-containing protein	-	-	-	-	-	-	-	-	-	-	-	-	DYW_deaminase,PPR,PPR_2	2
182	scaffold122780:117466-119469_0	3218.PP1S183_52V6.1	1.1e-160	497	KOG4197@1|root,KOG4197@2759|Eukaryota,37KUJ@33090|Viridiplantae,3G9E6@35493|Streptophyta	35493|Streptophyta	IQ	Pentatricopeptide repeat-containing protein	-	-	-	-	-	-	-	-	-	-	-	-	DYW_deaminase,PPR,PPR_2	2
183	scaffold123687:20790-21353_0	4155.Migut.H00140.1.p	2.43e-15	77	2CYBA@1|root,2S4NQ@2759|Eukaryota,37W8Z@33090|Viridiplantae,3GK9F@35493|Streptophyta,44R39@71274|asterids	35493|Streptophyta	-	-	-	-	-	-	-	-	-	-	-	-	-	-	-	2
184	scaffold123687:20801-21251_0	4155.Migut.H00140.1.p	8.47e-16	77	2CYBA@1|root,2S4NQ@2759|Eukaryota,37W8Z@33090|Viridiplantae,3GK9F@35493|Streptophyta,44R39@71274|asterids	35493|Streptophyta	-	-	-	-	-	-	-	-	-	-	-	-	-	-	-	2
185	scaffold123907:11294-11562_0	29760.VIT_15s0048g01710.t01	2.58e-24	100	COG0604@1|root,KOG1198@2759|Eukaryota,37SG8@33090|Viridiplantae,3GA3Z@35493|Streptophyta	35493|Streptophyta	C	Quinone oxidoreductase-like protein	-	-	1.3.1.105	ko:K18980	-	-	-	-	ko00000,ko01000	-	-	-	ADH_N,ADH_zinc_N_2	2
186	scaffold123907:11646-12132_0	13333.ERN19463	2.65e-64	206	COG0604@1|root,KOG1198@2759|Eukaryota,37SG8@33090|Viridiplantae,3GA3Z@35493|Streptophyta	35493|Streptophyta	C	Quinone oxidoreductase-like protein	-	-	1.3.1.105	ko:K18980	-	-	-	-	ko00000,ko01000	-	-	-	ADH_N,ADH_zinc_N_2	2
187	scaffold123907:12278-12466_0	85681.XP_006438389.1	4.9e-11	63.2	COG0604@1|root,KOG1198@2759|Eukaryota,37RRG@33090|Viridiplantae,3GC21@35493|Streptophyta	35493|Streptophyta	C	Quinone oxidoreductase-like protein	-	GO:0003674,GO:0003824,GO:0005575,GO:0005576,GO:0005622,GO:0005623,GO:0005737,GO:0006950,GO:0008150,GO:0008152,GO:0009266,GO:0009409,GO:0009507,GO:0009526,GO:0009532,GO:0009536,GO:0009570,GO:0009579,GO:0009628,GO:0009941,GO:0010319,GO:0016491,GO:0016627,GO:0016628,GO:0031967,GO:0031975,GO:0035671,GO:0035798,GO:0043226,GO:0043227,GO:0043229,GO:0043231,GO:0044422,GO:0044424,GO:0044434,GO:0044435,GO:…	1.3.1.105	ko:K18980	-	-	-	-	ko00000,ko01000	-	-	-	ADH_N,ADH_zinc_N_2	2
188	scaffold123948:149715-149956_0	29760.VIT_17s0000g08370.t01	7.69e-32	120	28M3S@1|root,2QTKK@2759|Eukaryota,37SCV@33090|Viridiplantae,3GGV9@35493|Streptophyta	35493|Streptophyta	S	inactive poly ADP-ribose polymerase	-	GO:0005575,GO:0005622,GO:0005623,GO:0005737,GO:0005739,GO:0006950,GO:0006970,GO:0008150,GO:0008152,GO:0009628,GO:0009651,GO:0009987,GO:0043226,GO:0043227,GO:0043229,GO:0043231,GO:0044237,GO:0044424,GO:0044444,GO:0044464,GO:0050896,GO:0072593	-	-	-	-	-	-	-	-	-	-	PARP,RST	2
189	scaffold123948:150161-151242_0	13333.ERN06674	3.58e-18	93.2	28M3S@1|root,2QTKK@2759|Eukaryota,37SCV@33090|Viridiplantae,3GGV9@35493|Streptophyta	35493|Streptophyta	S	inactive poly ADP-ribose polymerase	-	GO:0005575,GO:0005622,GO:0005623,GO:0005737,GO:0005739,GO:0006950,GO:0006970,GO:0008150,GO:0008152,GO:0009628,GO:0009651,GO:0009987,GO:0043226,GO:0043227,GO:0043229,GO:0043231,GO:0044237,GO:0044424,GO:0044444,GO:0044464,GO:0050896,GO:0072593	-	-	-	-	-	-	-	-	-	-	PARP,RST	2
190	scaffold126106:20271-21840_0	3218.PP1S271_42V6.1	1.95e-220	632	KOG1844@1|root,KOG1844@2759|Eukaryota,37IEA@33090|Viridiplantae,3GBRB@35493|Streptophyta	35493|Streptophyta	S	PHD finger protein MALE	-	GO:0000003,GO:0003006,GO:0005575,GO:0005622,GO:0005623,GO:0005634,GO:0006355,GO:0007275,GO:0008150,GO:0009555,GO:0009653,GO:0009719,GO:0009725,GO:0009741,GO:0009791,GO:0009846,GO:0009856,GO:0009889,GO:0009891,GO:0009893,GO:0009908,GO:0009987,GO:0010033,GO:0010208,GO:0010468,GO:0010556,GO:0010557,GO:0010604,GO:0010628,GO:0010927,GO:0010941,GO:0010942,GO:0014070,GO:0016043,GO:0019219,GO:0019222,GO:…	-	-	-	-	-	-	-	-	-	-	PHD	2
191	scaffold126106:23643-23985_0	50452.A0A087HSI4	1.25e-20	92.8	KOG1844@1|root,KOG1844@2759|Eukaryota,37P8S@33090|Viridiplantae,3GF2R@35493|Streptophyta,3HT61@3699|Brassicales	35493|Streptophyta	K	PHD zinc finger	-	-	-	-	-	-	-	-	-	-	-	-	PHD	2
192	scaffold126106:25678-25969_0	3649.evm.model.supercontig_87.36	7.78e-18	78.2	KOG1844@1|root,KOG1844@2759|Eukaryota,37IEA@33090|Viridiplantae,3GBRB@35493|Streptophyta	35493|Streptophyta	S	PHD finger protein MALE	-	GO:0000003,GO:0000212,GO:0000226,GO:0000228,GO:0000280,GO:0000785,GO:0000790,GO:0000791,GO:0003006,GO:0003674,GO:0003676,GO:0003677,GO:0003682,GO:0005488,GO:0005515,GO:0005575,GO:0005622,GO:0005623,GO:0005634,GO:0005694,GO:0005719,GO:0006323,GO:0006355,GO:0006996,GO:0007010,GO:0007017,GO:0007049,GO:0007051,GO:0007059,GO:0007060,GO:0007140,GO:0007275,GO:0007276,GO:0008134,GO:0008150,GO:0009555,GO:…	-	-	-	-	-	-	-	-	-	-	PHD	2
193	scaffold126691:19488-19995_0	102107.XP_008226602.1	2.87e-13	73.6	2CYER@1|root,2S3WW@2759|Eukaryota,37WG4@33090|Viridiplantae,3GK9U@35493|Streptophyta,4JQTS@91835|fabids	35493|Streptophyta	K	B3 domain-containing protein	-	-	-	-	-	-	-	-	-	-	-	-	B3	2
194	scaffold126691:30381-30615_0	225117.XP_009365406.1	1.34e-27	106	KOG0266@1|root,KOG0266@2759|Eukaryota,37NSQ@33090|Viridiplantae,3GGJM@35493|Streptophyta,4JDZ1@91835|fabids	35493|Streptophyta	S	Topless-related protein	-	GO:0000003,GO:0001101,GO:0003002,GO:0003006,GO:0003674,GO:0005488,GO:0005515,GO:0005575,GO:0005622,GO:0005623,GO:0005634,GO:0005737,GO:0005829,GO:0006355,GO:0007154,GO:0007165,GO:0007275,GO:0007389,GO:0008150,GO:0009653,GO:0009719,GO:0009725,GO:0009733,GO:0009753,GO:0009755,GO:0009790,GO:0009791,GO:0009793,GO:0009867,GO:0009888,GO:0009889,GO:0009890,GO:0009892,GO:0009933,GO:0009987,GO:0010014,GO:…	-	ko:K14963	ko04934,map04934	-	-	-	ko00000,ko00001,ko03036	-	-	-	WD40	2
195	scaffold127636:43834-44104_0	4432.XP_010252861.1	6.42e-24	97.4	KOG4174@1|root,KOG4174@2759|Eukaryota,37PR0@33090|Viridiplantae,3GG24@35493|Streptophyta	35493|Streptophyta	S	At4g26485-like	-	-	2.1.1.313	ko:K19307	-	-	-	-	ko00000,ko01000,ko03009	-	-	-	DUF2431	2
196	scaffold127636:44268-44466_0	85681.XP_006435530.1	3.41e-16	75.9	KOG4174@1|root,KOG4174@2759|Eukaryota,37RCK@33090|Viridiplantae,3GB6X@35493|Streptophyta	35493|Streptophyta	T	Domain of unknown function (DUF2431)	-	GO:0003674,GO:0003824,GO:0004812,GO:0004826,GO:0005575,GO:0005622,GO:0005623,GO:0005737,GO:0006082,GO:0006139,GO:0006399,GO:0006412,GO:0006418,GO:0006432,GO:0006518,GO:0006520,GO:0006725,GO:0006807,GO:0008150,GO:0008152,GO:0009058,GO:0009059,GO:0009987,GO:0010467,GO:0016070,GO:0016874,GO:0016875,GO:0019538,GO:0019752,GO:0034641,GO:0034645,GO:0034660,GO:0043038,GO:0043039,GO:0043043,GO:0043170,GO:…	2.1.1.313	ko:K19307	-	-	-	-	ko00000,ko01000,ko03009	-	-	-	DUF2431	2
197	scaffold127636:44561-44762_0	3847.GLYMA02G46360.2	2.37e-15	73.9	KOG4174@1|root,KOG4174@2759|Eukaryota,37TXW@33090|Viridiplantae,3GHW3@35493|Streptophyta,4JP32@91835|fabids	35493|Streptophyta	S	At4g26485-like	-	-	2.1.1.313	ko:K19307	-	-	-	-	ko00000,ko01000,ko03009	-	-	-	DUF2431	2
198	scaffold127978:24984-27704_0	71139.XP_010036902.1	2.94e-222	661	COG4354@1|root,KOG1059@2759|Eukaryota,37MZK@33090|Viridiplantae,3GFYC@35493|Streptophyta	35493|Streptophyta	U	Part of the AP-3 complex, an adaptor-related complex which seems to be clathrin-associated. The complex is associated with the Golgi region as well as more peripheral structures. It facilitates the budding of vesicles from the Golgi membrane and may be directly involved in trafficking to the vacuole. It also function in maintaining the identity of lytic vacuoles and in regulating the transition b…	-	GO:0005575,GO:0005622,GO:0005623,GO:0005737,GO:0005794,GO:0006810,GO:0006886,GO:0006903,GO:0006996,GO:0007032,GO:0007033,GO:0008104,GO:0008150,GO:0009987,GO:0010256,GO:0012505,GO:0015031,GO:0015833,GO:0016043,GO:0016050,GO:0016192,GO:0033036,GO:0034613,GO:0042886,GO:0043226,GO:0043227,GO:0043229,GO:0043231,GO:0044424,GO:0044444,GO:0044464,GO:0045184,GO:0046907,GO:0051179,GO:0051234,GO:0051640,GO:…	-	ko:K12396	ko04142,map04142	-	-	-	ko00000,ko00001,ko04131	-	-	-	Adaptin_N	2
199	scaffold12808:27005-27950_0	42345.XP_008785170.1	5.49e-97	305	COG3104@1|root,KOG1237@2759|Eukaryota,37N6S@33090|Viridiplantae,3G9VY@35493|Streptophyta,3KUSJ@4447|Liliopsida	35493|Streptophyta	E	POT family	-	GO:0001101,GO:0003674,GO:0005215,GO:0006810,GO:0006857,GO:0006950,GO:0006952,GO:0006970,GO:0006972,GO:0008150,GO:0009605,GO:0009607,GO:0009611,GO:0009617,GO:0009624,GO:0009628,GO:0009651,GO:0009719,GO:0009725,GO:0009737,GO:0009751,GO:0009753,GO:0010033,GO:0010243,GO:0014070,GO:0015833,GO:0022857,GO:0033993,GO:0035672,GO:0035673,GO:0042221,GO:0042493,GO:0042538,GO:0042742,GO:0042886,GO:0042887,GO:…	-	ko:K14638	-	-	-	-	ko00000,ko02000	2.A.17.3	-	-	PTR2	2
200	scaffold12808:29077-29639_0	4006.Lus10011786	5.71e-80	256	COG3104@1|root,KOG1237@2759|Eukaryota,37N6S@33090|Viridiplantae,3G9VY@35493|Streptophyta,4JEKM@91835|fabids	35493|Streptophyta	E	Protein NRT1 PTR FAMILY 5.2-like	-	GO:0001101,GO:0003674,GO:0005215,GO:0006810,GO:0006857,GO:0006950,GO:0006952,GO:0006970,GO:0006972,GO:0008150,GO:0009605,GO:0009607,GO:0009611,GO:0009617,GO:0009624,GO:0009628,GO:0009651,GO:0009719,GO:0009725,GO:0009737,GO:0009751,GO:0009753,GO:0010033,GO:0010243,GO:0014070,GO:0015833,GO:0022857,GO:0033993,GO:0035672,GO:0035673,GO:0042221,GO:0042493,GO:0042538,GO:0042742,GO:0042886,GO:0042887,GO:…	-	ko:K14638	-	-	-	-	ko00000,ko02000	2.A.17.3	-	-	PTR2	2
201	scaffold12808:30121-30338_0	3712.Bo3g034960.1	4.66e-30	108	COG3104@1|root,KOG1237@2759|Eukaryota,37PK0@33090|Viridiplantae,3GB0J@35493|Streptophyta,3HMRJ@3699|Brassicales	35493|Streptophyta	E	Protein NRT1 PTR FAMILY	-	GO:0008150,GO:0009605,GO:0009607,GO:0009624,GO:0043207,GO:0050896,GO:0051704,GO:0051707	-	ko:K14638	-	-	-	-	ko00000,ko02000	2.A.17.3	-	-	PTR2	2
202	scaffold12943:231300-232907_0	4432.XP_010262309.1	3.96e-262	733	KOG0252@1|root,KOG0252@2759|Eukaryota,37I5U@33090|Viridiplantae,3GERK@35493|Streptophyta	35493|Streptophyta	P	Inorganic phosphate transporter	-	GO:0001101,GO:0003674,GO:0005215,GO:0005315,GO:0005575,GO:0005622,GO:0005623,GO:0005634,GO:0005737,GO:0005773,GO:0005794,GO:0005886,GO:0005887,GO:0005911,GO:0006810,GO:0006811,GO:0006820,GO:0008150,GO:0008509,GO:0009506,GO:0009719,GO:0009725,GO:0009737,GO:0010033,GO:0012505,GO:0015075,GO:0015291,GO:0015318,GO:0016020,GO:0016021,GO:0022804,GO:0022857,GO:0030054,GO:0031224,GO:0031226,GO:0033993,GO:…	-	ko:K08176	-	-	-	-	ko00000,ko02000	2.A.1.9	-	-	Sugar_tr	2
203	scaffold129576:3888-4566_0	29760.VIT_05s0051g00170.t01	5.16e-21	99	COG4886@1|root,2SYY0@2759|Eukaryota	29760.VIT_05s0051g00170.t01|-	S	Pfam:Arch_ATPase	-	-	-	-	-	-	-	-	-	-	-	-	-	2
204	scaffold129576:4689-5290_0	40148.OGLUM07G18800.1	1.34e-22	97.4	2CXI7@1|root,2RXQV@2759|Eukaryota,37TRI@33090|Viridiplantae,3GI0T@35493|Streptophyta,3M09M@4447|Liliopsida,3IGKS@38820|Poales	35493|Streptophyta	S	TIR domain	-	-	-	-	-	-	-	-	-	-	-	-	TIR,TIR_2	2
205	scaffold129576:4689-5344_0	40148.OGLUM07G18800.1	2.2e-22	97.4	2CXI7@1|root,2RXQV@2759|Eukaryota,37TRI@33090|Viridiplantae,3GI0T@35493|Streptophyta,3M09M@4447|Liliopsida,3IGKS@38820|Poales	35493|Streptophyta	S	TIR domain	-	-	-	-	-	-	-	-	-	-	-	-	TIR,TIR_2	2
206	scaffold129852:15235-15450_0	3827.XP_004493715.1	1.09e-20	85.5	2C0PQ@1|root,2QVXS@2759|Eukaryota,37PB0@33090|Viridiplantae,3G9EZ@35493|Streptophyta,4JEBC@91835|fabids	35493|Streptophyta	Q	Belongs to the peroxidase family. Classical plant (class III) peroxidase subfamily	-	GO:0000003,GO:0002215,GO:0003006,GO:0005575,GO:0005622,GO:0005623,GO:0005737,GO:0005773,GO:0005774,GO:0005794,GO:0006950,GO:0006952,GO:0007275,GO:0008150,GO:0009791,GO:0009908,GO:0012505,GO:0016020,GO:0022414,GO:0031090,GO:0032501,GO:0032502,GO:0043226,GO:0043227,GO:0043229,GO:0043231,GO:0044422,GO:0044424,GO:0044437,GO:0044444,GO:0044446,GO:0044464,GO:0048367,GO:0048608,GO:0048731,GO:0048856,GO:…	1.11.1.7	ko:K00430	ko00940,ko01100,ko01110,map00940,map01100,map01110	-	R00602,R02596,R03919,R04007,R07443	RC00034	ko00000,ko00001,ko01000	-	-	-	peroxidase	2
207	scaffold129852:15580-15771_0	4565.Traes_7DL_C020A321F.1	7.03e-24	92	2C0PQ@1|root,2QQ2M@2759|Eukaryota,37IEW@33090|Viridiplantae,3GFRT@35493|Streptophyta,3KPK6@4447|Liliopsida,3IBH3@38820|Poales	35493|Streptophyta	Q	Belongs to the peroxidase family. Classical plant (class III) peroxidase subfamily	-	-	1.11.1.7	ko:K00430	ko00940,ko01100,ko01110,map00940,map01100,map01110	-	R00602,R02596,R03919,R04007,R07443	RC00034	ko00000,ko00001,ko01000	-	-	-	peroxidase	2
208	scaffold129852:19355-19952_0	13037.EHJ71792	8.34e-34	130	2CN36@1|root,2QTNN@2759|Eukaryota,38FJC@33154|Opisthokonta,3BM27@33208|Metazoa,3D0HQ@33213|Bilateria	33208|Metazoa	-	-	-	-	-	-	-	-	-	-	-	-	-	-	RVT_1	2
209	scaffold130967:38174-38986_0	4432.XP_010250361.1	5.52e-75	239	KOG1072@1|root,KOG1072@2759|Eukaryota,37QJ7@33090|Viridiplantae,3GESE@35493|Streptophyta	35493|Streptophyta	S	F-box kelch-repeat protein	-	GO:0000151,GO:0003674,GO:0005488,GO:0005515,GO:0005575,GO:0005622,GO:0005623,GO:0005737,GO:0005829,GO:0006508,GO:0006511,GO:0006807,GO:0008150,GO:0008152,GO:0009056,GO:0009057,GO:0009966,GO:0009968,GO:0009987,GO:0010498,GO:0010646,GO:0010648,GO:0019005,GO:0019222,GO:0019538,GO:0019899,GO:0019941,GO:0023051,GO:0023057,GO:0030162,GO:0030163,GO:0031323,GO:0031461,GO:0031625,GO:0032991,GO:0043161,GO:…	-	-	-	-	-	-	-	-	-	-	F-box,Kelch_1,Kelch_6	2
210	scaffold131508:58709-58926_0	4155.Migut.I00074.1.p	4.92e-30	112	2CQGX@1|root,2R4SD@2759|Eukaryota,37NJQ@33090|Viridiplantae,3GGZY@35493|Streptophyta	35493|Streptophyta	K	transcription factor	-	-	-	-	-	-	-	-	-	-	-	-	Myb_DNA-binding	2
211	scaffold132182:60992-61151_0	4432.XP_010272019.1	6.59e-16	73.9	KOG4401@1|root,KOG4401@2759|Eukaryota,37IMV@33090|Viridiplantae,3GE32@35493|Streptophyta	35493|Streptophyta	S	Protein LSM12 homolog	-	-	-	-	-	-	-	-	-	-	-	-	AD	2
212	scaffold13257:136585-136995_0	40148.OGLUM07G18800.1	7.01e-16	77.8	2CXI7@1|root,2RXQV@2759|Eukaryota,37TRI@33090|Viridiplantae,3GI0T@35493|Streptophyta,3M09M@4447|Liliopsida,3IGKS@38820|Poales	35493|Streptophyta	S	TIR domain	-	-	-	-	-	-	-	-	-	-	-	-	TIR,TIR_2	2
213	scaffold13257:137131-138271_0	13333.ERM94380	2.02e-73	255	2EF04@1|root,2SK9Z@2759|Eukaryota,37Z2C@33090|Viridiplantae,3GNBV@35493|Streptophyta	35493|Streptophyta	S	TIR domain	-	-	-	-	-	-	-	-	-	-	-	-	LRR_1,NB-ARC,TIR	2
214	scaffold133907:20104-22023_0	13333.ERN09426	1.48e-188	553	KOG4197@1|root,KOG4197@2759|Eukaryota,37P8N@33090|Viridiplantae,3G8YK@35493|Streptophyta	35493|Streptophyta	E	Pentatricopeptide repeat-containing protein	-	-	2.2.1.6	ko:K01653	ko00290,ko00650,ko00660,ko00770,ko01100,ko01110,ko01130,ko01210,ko01230,map00290,map00650,map00660,map00770,map01100,map01110,map01130,map01210,map01230	M00019,M00570	R00006,R00014,R00226,R03050,R04672,R04673,R08648	RC00027,RC00106,RC01192,RC02744,RC02893	ko00000,ko00001,ko00002,ko01000	-	-	-	PPR,PPR_2	2
215	scaffold133965:90936-91728_0	50452.A0A087HPL4	1.32e-84	259	2CM7G@1|root,2QPIR@2759|Eukaryota,37NTM@33090|Viridiplantae,3GE14@35493|Streptophyta,3I24Y@3699|Brassicales	35493|Streptophyta	O	Thaumatin family	-	-	-	-	-	-	-	-	-	-	-	-	Thaumatin	2
216	scaffold133981:207144-207273_0	4641.GSMUA_Achr4P29230_001	8.04e-18	79	COG5147@1|root,KOG0048@2759|Eukaryota,37T91@33090|Viridiplantae,3GD93@35493|Streptophyta,3KRBW@4447|Liliopsida	35493|Streptophyta	K	Myb-like DNA-binding domain	-	-	-	ko:K09422	-	-	-	-	ko00000,ko03000	-	-	-	Myb_DNA-binding	2
217	scaffold133981:207348-207966_0	4533.OB12G23080.1	8.55e-09	61.6	COG5147@1|root,KOG0048@2759|Eukaryota,37S61@33090|Viridiplantae,3GD07@35493|Streptophyta,3KYSY@4447|Liliopsida,3I41C@38820|Poales	35493|Streptophyta	K	Myb-like DNA-binding domain	-	GO:0000981,GO:0000988,GO:0000989,GO:0001067,GO:0001076,GO:0001101,GO:0001134,GO:0001135,GO:0003674,GO:0003676,GO:0003677,GO:0003700,GO:0005488,GO:0005575,GO:0005622,GO:0005623,GO:0005634,GO:0006355,GO:0006357,GO:0008150,GO:0009719,GO:0009723,GO:0009725,GO:0009739,GO:0009751,GO:0009753,GO:0009889,GO:0009987,GO:0010033,GO:0010035,GO:0010038,GO:0010200,GO:0010243,GO:0010468,GO:0010556,GO:0014070,GO:…	-	ko:K09422	-	-	-	-	ko00000,ko03000	-	-	-	Myb_DNA-binding	2
218	scaffold135161:20333-21140_0	3847.GLYMA03G05070.1	1.67e-102	308	COG1028@1|root,KOG0725@2759|Eukaryota,37S3J@33090|Viridiplantae,3GF7T@35493|Streptophyta,4JDS6@91835|fabids	35493|Streptophyta	Q	short-chain dehydrogenase reductase	-	-	3.6.4.12	ko:K15255	-	-	-	-	ko00000,ko01000,ko03029,ko03032	-	-	-	adh_short,adh_short_C2	2
219	scaffold136257:2215-2347_0	3988.XP_002516126.1	4e-12	61.6	COG5147@1|root,KOG0048@2759|Eukaryota,37TCT@33090|Viridiplantae,3GGD4@35493|Streptophyta	35493|Streptophyta	K	Transcription factor	-	-	-	ko:K09422	-	-	-	-	ko00000,ko03000	-	-	-	Myb_DNA-binding	2
220	scaffold136257:2429-2558_0	4006.Lus10000008	3e-18	77	COG5147@1|root,KOG0048@2759|Eukaryota,37TCT@33090|Viridiplantae,3GGD4@35493|Streptophyta,4JP5T@91835|fabids	35493|Streptophyta	K	Transcription factor	-	GO:0000981,GO:0000988,GO:0000989,GO:0001067,GO:0001076,GO:0001101,GO:0001134,GO:0001135,GO:0003674,GO:0003676,GO:0003677,GO:0003700,GO:0005488,GO:0005575,GO:0005622,GO:0005623,GO:0005634,GO:0006355,GO:0006357,GO:0008150,GO:0009314,GO:0009411,GO:0009416,GO:0009628,GO:0009719,GO:0009725,GO:0009751,GO:0009753,GO:0009889,GO:0009890,GO:0009892,GO:0009987,GO:0010033,GO:0010224,GO:0010468,GO:0010556,GO:…	-	ko:K09422	-	-	-	-	ko00000,ko03000	-	-	-	Myb_DNA-binding	2
221	scaffold136257:2679-3387_0	72658.Bostr.12659s0116.1.p	3.2e-11	69.3	COG5147@1|root,KOG0048@2759|Eukaryota,37IYP@33090|Viridiplantae,3G7YH@35493|Streptophyta,3HXV8@3699|Brassicales	35493|Streptophyta	K	Transcription factor	-	GO:0000981,GO:0000988,GO:0000989,GO:0001067,GO:0001076,GO:0001101,GO:0001134,GO:0001135,GO:0003674,GO:0003676,GO:0003677,GO:0003700,GO:0005488,GO:0005575,GO:0005622,GO:0005623,GO:0005634,GO:0006082,GO:0006355,GO:0006357,GO:0006725,GO:0006950,GO:0006970,GO:0008150,GO:0008152,GO:0009058,GO:0009611,GO:0009628,GO:0009651,GO:0009698,GO:0009699,GO:0009719,GO:0009725,GO:0009737,GO:0009751,GO:0009800,GO:…	-	ko:K09422	-	-	-	-	ko00000,ko03000	-	-	-	Myb_DNA-binding	2
222	scaffold13698:46551-46967_0	3659.XP_004168248.1	4.81e-26	109	KOG4197@1|root,KOG4197@2759|Eukaryota,37SU0@33090|Viridiplantae,3G9R0@35493|Streptophyta,4JHUD@91835|fabids	35493|Streptophyta	S	Pentatricopeptide repeat-containing protein	-	-	-	-	-	-	-	-	-	-	-	-	DYW_deaminase,PPR,PPR_2	2
223	scaffold13698:47591-47850_0	3988.XP_002520617.1	2.9e-10	62.4	KOG4197@1|root,KOG4197@2759|Eukaryota,37JMV@33090|Viridiplantae,3GEIQ@35493|Streptophyta,4JN6V@91835|fabids	35493|Streptophyta	S	Pentatricopeptide repeat-containing protein	-	-	-	-	-	-	-	-	-	-	-	-	DYW_deaminase,PPR	2
224	scaffold137494:67338-67682_0	3641.EOY18928	1.18e-10	64.7	KOG4197@1|root,KOG4197@2759|Eukaryota	2759|Eukaryota	S	endonuclease activity	-	-	-	-	-	-	-	-	-	-	-	-	-	2
225	scaffold137494:68004-68871_0	4113.PGSC0003DMT400020706	1.64e-39	151	KOG4197@1|root,KOG4197@2759|Eukaryota,37KPI@33090|Viridiplantae,3GCM6@35493|Streptophyta,44PNU@71274|asterids	35493|Streptophyta	S	Pentatricopeptide repeat-containing protein	-	GO:0003674,GO:0003676,GO:0003723,GO:0003824,GO:0004518,GO:0004519,GO:0005488,GO:0005575,GO:0005622,GO:0005623,GO:0006139,GO:0006725,GO:0006807,GO:0008150,GO:0008152,GO:0009451,GO:0009987,GO:0016070,GO:0016787,GO:0016788,GO:0034641,GO:0043170,GO:0043226,GO:0043227,GO:0043229,GO:0043231,GO:0043412,GO:0044237,GO:0044238,GO:0044424,GO:0044464,GO:0046483,GO:0071704,GO:0090304,GO:0090305,GO:0097159,GO:…	-	-	-	-	-	-	-	-	-	-	PPR,PPR_2,PPR_3	2
226	scaffold137513:147327-148514_0	4432.XP_010260583.1	1.59e-159	473	KOG4197@1|root,KOG4197@2759|Eukaryota,37PAM@33090|Viridiplantae,3GGGF@35493|Streptophyta	35493|Streptophyta	L	Pentatricopeptide repeat-containing protein At3g26782	-	GO:0003674,GO:0003676,GO:0003723,GO:0003824,GO:0004518,GO:0004519,GO:0005488,GO:0005575,GO:0005622,GO:0005623,GO:0005737,GO:0005739,GO:0006139,GO:0006725,GO:0006807,GO:0008150,GO:0008152,GO:0009451,GO:0009987,GO:0016070,GO:0016787,GO:0016788,GO:0034641,GO:0043170,GO:0043226,GO:0043227,GO:0043229,GO:0043231,GO:0043412,GO:0044237,GO:0044238,GO:0044424,GO:0044444,GO:0044464,GO:0046483,GO:0071704,GO:…	-	-	-	-	-	-	-	-	-	-	DYW_deaminase,PPR,PPR_2	2
227	scaffold137513:148830-149482_0	3641.EOX94498	2.42e-18	90.9	KOG4197@1|root,KOG4197@2759|Eukaryota,37N0W@33090|Viridiplantae,3G7KZ@35493|Streptophyta	35493|Streptophyta	E	Pentatricopeptide repeat-containing protein At1g06145-like	-	GO:0003674,GO:0003676,GO:0003700,GO:0003723,GO:0003824,GO:0004518,GO:0004519,GO:0004672,GO:0004674,GO:0005488,GO:0005575,GO:0005622,GO:0005623,GO:0005634,GO:0005737,GO:0005829,GO:0006139,GO:0006355,GO:0006464,GO:0006468,GO:0006725,GO:0006793,GO:0006796,GO:0006807,GO:0007154,GO:0007165,GO:0007275,GO:0008150,GO:0008152,GO:0009451,GO:0009889,GO:0009987,GO:0010468,GO:0010556,GO:0016070,GO:0016301,GO:…	-	-	-	-	-	-	-	-	-	-	DYW_deaminase,PPR,PPR_2,bHLH-MYC_N	2
228	scaffold137729:71831-74318_0	4533.OB12G14740.1	1.19e-68	253	COG4886@1|root,2QUNV@2759|Eukaryota,37IEF@33090|Viridiplantae,3G861@35493|Streptophyta,3KMDP@4447|Liliopsida,3I41P@38820|Poales	35493|Streptophyta	T	Leucine rich repeat	-	-	-	-	-	-	-	-	-	-	-	-	LRRNT_2,LRR_1,LRR_4,LRR_6,LRR_8,Pkinase,Pkinase_Tyr	2
229	scaffold137729:76237-76556_0	4641.GSMUA_Achr3P17410_001	1.96e-26	107	COG4886@1|root,2QUNV@2759|Eukaryota,37IEF@33090|Viridiplantae,3G861@35493|Streptophyta,3KMDP@4447|Liliopsida	35493|Streptophyta	T	Leucine rich repeat	-	-	-	-	-	-	-	-	-	-	-	-	LRRNT_2,LRR_1,LRR_4,LRR_6,LRR_8,Pkinase,Pkinase_Tyr	2
230	scaffold137733:21799-22058_0	3750.XP_008363098.1	3.74e-12	67.4	COG2124@1|root,KOG0157@2759|Eukaryota,37NN9@33090|Viridiplantae,3G810@35493|Streptophyta,4JF9T@91835|fabids	35493|Streptophyta	Q	Belongs to the cytochrome P450 family	ROT3	GO:0000003,GO:0000902,GO:0003006,GO:0003674,GO:0003824,GO:0004497,GO:0006629,GO:0006694,GO:0007275,GO:0008150,GO:0008152,GO:0008202,GO:0008610,GO:0009058,GO:0009653,GO:0009791,GO:0009826,GO:0009908,GO:0009965,GO:0009987,GO:0010016,GO:0010268,GO:0010817,GO:0016043,GO:0016049,GO:0016125,GO:0016128,GO:0016129,GO:0016131,GO:0016132,GO:0016491,GO:0016705,GO:0016709,GO:0022414,GO:0032501,GO:0032502,GO:…	1.14.13.112	ko:K12637	ko00905,ko01100,ko01110,map00905,map01100,map01110	M00371	R07431,R07448,R07786,R07787,R07791,R07792	RC02078	ko00000,ko00001,ko00002,ko00199,ko01000	-	-	-	p450	2
231	scaffold137733:25249-25573_0	981085.XP_010106667.1	3.91e-47	163	COG2124@1|root,KOG0157@2759|Eukaryota,37R65@33090|Viridiplantae,3GECR@35493|Streptophyta,4JEVM@91835|fabids	35493|Streptophyta	Q	Belongs to the cytochrome P450 family	-	GO:0000003,GO:0003006,GO:0003674,GO:0003824,GO:0004497,GO:0006629,GO:0006694,GO:0007275,GO:0008150,GO:0008152,GO:0008202,GO:0008610,GO:0009058,GO:0009791,GO:0009908,GO:0010268,GO:0010817,GO:0016125,GO:0016128,GO:0016129,GO:0016131,GO:0016132,GO:0016491,GO:0016705,GO:0016709,GO:0022414,GO:0032501,GO:0032502,GO:0042445,GO:0042446,GO:0042592,GO:0044238,GO:0048366,GO:0048367,GO:0048437,GO:0048438,GO:…	1.14.13.112	ko:K09589,ko:K12638	ko00905,ko01100,ko01110,map00905,map01100,map01110	M00371	R07431,R07444,R07448,R07449,R07786,R07787,R07791,R07792	RC00144,RC02078	ko00000,ko00001,ko00002,ko00199,ko01000	-	-	-	p450	2
232	scaffold137733:25653-25802_0	4565.Traes_3DS_77A631B6A.1	3.13e-13	65.1	COG2124@1|root,KOG0157@2759|Eukaryota	2759|Eukaryota	Q	iron ion binding	-	-	1.14.14.1	ko:K07427,ko:K07428,ko:K12795	ko04621,ko04626,ko04726,map04621,map04626,map04726	-	-	-	ko00000,ko00001,ko00199,ko01000	-	-	-	p450	2
233	scaffold137733:25912-26178_0	37682.EMT09662	2.86e-19	87	COG2124@1|root,KOG0157@2759|Eukaryota,37R65@33090|Viridiplantae,3GECR@35493|Streptophyta,3KNG2@4447|Liliopsida,3I3MX@38820|Poales	35493|Streptophyta	Q	Belongs to the cytochrome P450 family	-	GO:0000003,GO:0003006,GO:0003674,GO:0003824,GO:0004497,GO:0006629,GO:0006694,GO:0007275,GO:0008150,GO:0008152,GO:0008202,GO:0008610,GO:0009058,GO:0009791,GO:0009908,GO:0010268,GO:0010817,GO:0016125,GO:0016128,GO:0016129,GO:0016131,GO:0016132,GO:0016491,GO:0016705,GO:0016709,GO:0022414,GO:0032501,GO:0032502,GO:0042445,GO:0042446,GO:0042592,GO:0044238,GO:0048366,GO:0048367,GO:0048437,GO:0048438,GO:…	1.14.13.112	ko:K09589,ko:K12638	ko00905,ko01100,ko01110,map00905,map01100,map01110	M00371	R07431,R07444,R07448,R07449,R07786,R07787,R07791,R07792	RC00144,RC02078	ko00000,ko00001,ko00002,ko00199,ko01000	-	-	-	p450	2
234	scaffold137733:26890-26996_0	4113.PGSC0003DMT400006405	1.86e-15	70.5	COG2124@1|root,KOG0157@2759|Eukaryota,37R65@33090|Viridiplantae,3GECR@35493|Streptophyta,44FDD@71274|asterids	35493|Streptophyta	Q	cytochrome P450	-	GO:0000003,GO:0003006,GO:0003674,GO:0003824,GO:0004497,GO:0006629,GO:0006694,GO:0007275,GO:0008150,GO:0008152,GO:0008202,GO:0008610,GO:0009058,GO:0009791,GO:0009908,GO:0010268,GO:0010817,GO:0016125,GO:0016128,GO:0016129,GO:0016131,GO:0016132,GO:0016491,GO:0016705,GO:0016709,GO:0022414,GO:0032501,GO:0032502,GO:0042445,GO:0042446,GO:0042592,GO:0044238,GO:0048366,GO:0048367,GO:0048437,GO:0048438,GO:…	1.14.13.112	ko:K09589,ko:K12638	ko00905,ko01100,ko01110,map00905,map01100,map01110	M00371	R07431,R07444,R07448,R07449,R07786,R07787,R07791,R07792	RC00144,RC02078	ko00000,ko00001,ko00002,ko00199,ko01000	-	-	-	p450	2
235	scaffold137768:202530-203122_0	3847.GLYMA07G03115.1	1.49e-21	99.4	2CM79@1|root,2QPIE@2759|Eukaryota,37HN1@33090|Viridiplantae,3GBQQ@35493|Streptophyta,4JMGA@91835|fabids	35493|Streptophyta	S	UPF0481 protein	-	-	-	-	-	-	-	-	-	-	-	-	DUF247	2
236	scaffold137799:5639-6260_0	90675.XP_010496660.1	6.84e-46	169	COG0553@1|root,KOG0390@2759|Eukaryota,37PPI@33090|Viridiplantae,3GGVG@35493|Streptophyta,3HWZT@3699|Brassicales	35493|Streptophyta	L	SNF2 domain-containing protein CLASSY	CHR38	GO:0000003,GO:0000018,GO:0000280,GO:0003674,GO:0003676,GO:0003677,GO:0003824,GO:0005488,GO:0005575,GO:0005622,GO:0005623,GO:0005634,GO:0005694,GO:0005730,GO:0006139,GO:0006259,GO:0006310,GO:0006311,GO:0006325,GO:0006338,GO:0006342,GO:0006355,GO:0006725,GO:0006807,GO:0006996,GO:0007049,GO:0007127,GO:0007131,GO:0008094,GO:0008150,GO:0008152,GO:0009889,GO:0009890,GO:0009892,GO:0009987,GO:0010468,GO:…	-	ko:K10875	ko03440,map03440	-	-	-	ko00000,ko00001,ko01000,ko03400	-	-	-	Helicase_C,Methyltransf_11,Methyltransf_21,SNF2_N	2
237	scaffold137799:6356-6849_0	13333.ERM95535	9.76e-36	138	COG0553@1|root,KOG0390@2759|Eukaryota,37PPI@33090|Viridiplantae,3GGVG@35493|Streptophyta	35493|Streptophyta	L	SNF2 domain-containing protein CLASSY	CHR38	GO:0000003,GO:0000018,GO:0000280,GO:0003674,GO:0003676,GO:0003677,GO:0003824,GO:0005488,GO:0005575,GO:0005622,GO:0005623,GO:0005634,GO:0005694,GO:0005730,GO:0006139,GO:0006259,GO:0006310,GO:0006311,GO:0006325,GO:0006338,GO:0006342,GO:0006355,GO:0006725,GO:0006807,GO:0006996,GO:0007049,GO:0007127,GO:0007131,GO:0008094,GO:0008150,GO:0008152,GO:0009889,GO:0009890,GO:0009892,GO:0009987,GO:0010468,GO:…	-	ko:K10875	ko03440,map03440	-	-	-	ko00000,ko00001,ko01000,ko03400	-	-	-	Helicase_C,Methyltransf_11,Methyltransf_21,SNF2_N	2
238	scaffold138128:147473-149234_0	3983.cassava4.1_021729m	8.46e-244	709	COG0554@1|root,KOG0732@2759|Eukaryota,37KWK@33090|Viridiplantae,3GB6Y@35493|Streptophyta,4JJWQ@91835|fabids	35493|Streptophyta	O	ATPase family associated with various cellular activities (AAA)	-	GO:0000122,GO:0003674,GO:0003682,GO:0003824,GO:0005488,GO:0005515,GO:0005575,GO:0005622,GO:0005623,GO:0005634,GO:0005737,GO:0005783,GO:0005789,GO:0005829,GO:0006355,GO:0006357,GO:0008150,GO:0009889,GO:0009890,GO:0009891,GO:0009892,GO:0009893,GO:0010468,GO:0010556,GO:0010557,GO:0010558,GO:0010570,GO:0010604,GO:0010605,GO:0010628,GO:0010629,GO:0010639,GO:0012505,GO:0016020,GO:0016462,GO:0016787,GO:…	-	-	-	-	-	-	-	-	-	-	AAA,zf-HC5HC2H	2
239	scaffold138369:175295-175843_0	3712.Bo5g098850.1	9.87e-91	275	COG0534@1|root,KOG1347@2759|Eukaryota,37MUS@33090|Viridiplantae,3GN2P@35493|Streptophyta,3I25S@3699|Brassicales	33090|Viridiplantae	V	MatE	-	-	-	ko:K03327	-	-	-	-	ko00000,ko02000	2.A.66.1	-	-	MatE	2
240	scaffold138574:4493-4997_0	4432.XP_010278229.1	4.5e-62	210	KOG4197@1|root,KOG4197@2759|Eukaryota,37KHG@33090|Viridiplantae,3GB5Q@35493|Streptophyta	35493|Streptophyta	Q	Pentatricopeptide repeat-containing protein	-	GO:0003674,GO:0003676,GO:0003723,GO:0003824,GO:0004518,GO:0004519,GO:0005488,GO:0005575,GO:0005622,GO:0005623,GO:0006139,GO:0006725,GO:0006807,GO:0008150,GO:0008152,GO:0009451,GO:0009987,GO:0016070,GO:0016787,GO:0016788,GO:0034641,GO:0043170,GO:0043226,GO:0043227,GO:0043229,GO:0043231,GO:0043412,GO:0044237,GO:0044238,GO:0044424,GO:0044464,GO:0046483,GO:0071704,GO:0090304,GO:0090305,GO:0097159,GO:…	-	-	-	-	-	-	-	-	-	-	DYW_deaminase,PPR	2
241	scaffold138574:5375-5567_0	3885.XP_007146308.1	2.66e-17	77.4	KOG4197@1|root,KOG4197@2759|Eukaryota,37RFV@33090|Viridiplantae,3GA87@35493|Streptophyta,4JDF8@91835|fabids	35493|Streptophyta	S	Pentatricopeptide repeat-containing protein	-	GO:0003674,GO:0003676,GO:0003723,GO:0003824,GO:0004518,GO:0004519,GO:0005488,GO:0005575,GO:0005622,GO:0005623,GO:0006139,GO:0006725,GO:0006807,GO:0008150,GO:0008152,GO:0009451,GO:0009987,GO:0016070,GO:0016787,GO:0016788,GO:0034641,GO:0043170,GO:0043226,GO:0043227,GO:0043229,GO:0043231,GO:0043412,GO:0044237,GO:0044238,GO:0044424,GO:0044464,GO:0046483,GO:0071704,GO:0090304,GO:0090305,GO:0097159,GO:…	-	-	-	-	-	-	-	-	-	-	DYW_deaminase,PPR,PPR_2	2
242	scaffold138574:5706-6336_0	4098.XP_009602859.1	6.29e-64	218	KOG4197@1|root,KOG4197@2759|Eukaryota,37KP1@33090|Viridiplantae,3GCBC@35493|Streptophyta,44BXS@71274|asterids	35493|Streptophyta	S	Pentatricopeptide repeat-containing protein	-	-	-	-	-	-	-	-	-	-	-	-	DYW_deaminase,PPR	2
243	scaffold138685:179623-181716_0	29760.VIT_16s0050g02550.t01	2.07e-103	339	KOG4197@1|root,KOG4197@2759|Eukaryota,37SVA@33090|Viridiplantae,3GEPK@35493|Streptophyta	35493|Streptophyta	P	Pentatricopeptide repeat-containing protein	-	-	-	-	-	-	-	-	-	-	-	-	Cation_ATPase,E1-E2_ATPase,PPR,PPR_2,PhoLip_ATPase_C	2
244	scaffold13908:50110-51918_0	3218.PP1S183_52V6.1	1.6e-162	499	KOG4197@1|root,KOG4197@2759|Eukaryota,37KUJ@33090|Viridiplantae,3G9E6@35493|Streptophyta	35493|Streptophyta	IQ	Pentatricopeptide repeat-containing protein	-	-	-	-	-	-	-	-	-	-	-	-	DYW_deaminase,PPR,PPR_2	2
245	scaffold139152:99842-102469_0	42345.XP_008793555.1	7.98e-233	684	KOG4197@1|root,KOG4197@2759|Eukaryota,37I62@33090|Viridiplantae,3GAZB@35493|Streptophyta,3KU2I@4447|Liliopsida	35493|Streptophyta	S	Pentatricopeptide repeat domain	-	GO:0003674,GO:0003676,GO:0003723,GO:0003824,GO:0004518,GO:0004519,GO:0005488,GO:0005575,GO:0005622,GO:0005623,GO:0006139,GO:0006725,GO:0006807,GO:0008150,GO:0008152,GO:0009451,GO:0009987,GO:0016070,GO:0016787,GO:0016788,GO:0034641,GO:0043170,GO:0043226,GO:0043227,GO:0043229,GO:0043231,GO:0043412,GO:0044237,GO:0044238,GO:0044424,GO:0044464,GO:0046483,GO:0071704,GO:0090304,GO:0090305,GO:0097159,GO:…	-	-	-	-	-	-	-	-	-	-	DYW_deaminase,PPR,PPR_2	2
246	scaffold139394:69119-71140_0	4432.XP_010253731.1	2.33e-174	522	COG2304@1|root,2QTMS@2759|Eukaryota,37IGH@33090|Viridiplantae,3GH3Q@35493|Streptophyta	35493|Streptophyta	O	Zinc finger (C3HC4-type RING finger) family protein	-	-	-	-	-	-	-	-	-	-	-	-	VWA,Vwaint,zf-RING_11,zf-RING_2	2
247	scaffold139759:10291-10944_0	4641.GSMUA_Achr2P08660_001	1.28e-86	268	COG0277@1|root,KOG4730@2759|Eukaryota,37HWD@33090|Viridiplantae,3GD41@35493|Streptophyta,3M33W@4447|Liliopsida	35493|Streptophyta	V	FAD-binding and arabino-lactone oxidase domains containing protein	-	-	-	-	-	-	-	-	-	-	-	-	ALO,FAD_binding_4	2
248	scaffold139901:70246-70397_0	85681.XP_006430499.1	1.4e-17	77.4	28N0B@1|root,2QRHH@2759|Eukaryota,37RHT@33090|Viridiplantae,3GCG3@35493|Streptophyta	35493|Streptophyta	S	WAT1-related protein	-	-	-	-	-	-	-	-	-	-	-	-	EamA	2
249	scaffold139901:70506-70664_0	4565.Traes_3B_4780B18F6.2	8.83e-16	74.7	28N0B@1|root,2QRHH@2759|Eukaryota,37RHT@33090|Viridiplantae,3GCG3@35493|Streptophyta,3KNSB@4447|Liliopsida,3IC8X@38820|Poales	35493|Streptophyta	S	EamA-like transporter family	-	GO:0003674,GO:0005215,GO:0005575,GO:0005622,GO:0005623,GO:0005737,GO:0005886,GO:0005887,GO:0005938,GO:0006810,GO:0007154,GO:0007165,GO:0008150,GO:0009719,GO:0009725,GO:0009733,GO:0009734,GO:0009755,GO:0009987,GO:0010033,GO:0016020,GO:0016021,GO:0022857,GO:0023052,GO:0031224,GO:0031226,GO:0032870,GO:0042221,GO:0044424,GO:0044425,GO:0044444,GO:0044459,GO:0044464,GO:0050789,GO:0050794,GO:0050896,GO:…	-	-	-	-	-	-	-	-	-	-	EamA	2
250	scaffold139901:70918-71173_0	13333.ERM99080	1.09e-23	93.2	28N0B@1|root,2QRHH@2759|Eukaryota,37RHT@33090|Viridiplantae,3GCG3@35493|Streptophyta	35493|Streptophyta	S	WAT1-related protein	-	-	-	-	-	-	-	-	-	-	-	-	EamA	2
251	scaffold139901:71531-71647_0	13333.ERM99081	4.27e-14	67.4	28N0B@1|root,2QRHH@2759|Eukaryota,37RHT@33090|Viridiplantae,3GCG3@35493|Streptophyta	35493|Streptophyta	S	WAT1-related protein	-	GO:0003674,GO:0005215,GO:0005575,GO:0005622,GO:0005623,GO:0005737,GO:0005886,GO:0005887,GO:0005938,GO:0006810,GO:0007154,GO:0007165,GO:0008150,GO:0009719,GO:0009725,GO:0009733,GO:0009734,GO:0009755,GO:0009987,GO:0010033,GO:0016020,GO:0016021,GO:0022857,GO:0023052,GO:0031224,GO:0031226,GO:0032870,GO:0042221,GO:0044424,GO:0044425,GO:0044444,GO:0044459,GO:0044464,GO:0050789,GO:0050794,GO:0050896,GO:…	-	-	-	-	-	-	-	-	-	-	EamA	2
252	scaffold139901:72305-72513_0	4565.Traes_1DL_F5C14B999.1	5.1e-25	97.8	28N0B@1|root,2QRHH@2759|Eukaryota,37RHT@33090|Viridiplantae,3GCG3@35493|Streptophyta,3KNHI@4447|Liliopsida,3I6YN@38820|Poales	35493|Streptophyta	S	EamA-like transporter family	-	GO:0003674,GO:0005215,GO:0005575,GO:0005622,GO:0005623,GO:0005737,GO:0005886,GO:0005887,GO:0005938,GO:0006810,GO:0007154,GO:0007165,GO:0008150,GO:0009719,GO:0009725,GO:0009733,GO:0009734,GO:0009755,GO:0009987,GO:0010033,GO:0016020,GO:0016021,GO:0022857,GO:0023052,GO:0031224,GO:0031226,GO:0032870,GO:0042221,GO:0044424,GO:0044425,GO:0044444,GO:0044459,GO:0044464,GO:0050789,GO:0050794,GO:0050896,GO:…	-	-	-	-	-	-	-	-	-	-	EamA	2
253	scaffold14013:128937-129911_0	57918.XP_004308477.1	9.32e-27	117	KOG1721@1|root,KOG1721@2759|Eukaryota,37R9R@33090|Viridiplantae,3GF8D@35493|Streptophyta,4JNC4@91835|fabids	35493|Streptophyta	S	ZINC FINGER protein	-	GO:0000003,GO:0003006,GO:0003674,GO:0003700,GO:0005575,GO:0005622,GO:0005623,GO:0005634,GO:0006355,GO:0007275,GO:0007276,GO:0008150,GO:0009555,GO:0009889,GO:0009987,GO:0010468,GO:0010556,GO:0019219,GO:0019222,GO:0019953,GO:0022412,GO:0022414,GO:0030154,GO:0031323,GO:0031326,GO:0032501,GO:0032502,GO:0032504,GO:0043226,GO:0043227,GO:0043229,GO:0043231,GO:0044424,GO:0044464,GO:0044703,GO:0048229,GO:…	-	-	-	-	-	-	-	-	-	-	zf-C2H2_6	2
254	scaffold140441:10542-12014_0	218851.Aquca_122_00018.1	2.53e-155	458	COG2124@1|root,KOG0156@2759|Eukaryota,37Q52@33090|Viridiplantae,3GDRZ@35493|Streptophyta	35493|Streptophyta	Q	Belongs to the cytochrome P450 family	-	GO:0003674,GO:0003824,GO:0004497,GO:0005575,GO:0006082,GO:0006629,GO:0006631,GO:0008150,GO:0008152,GO:0009058,GO:0009059,GO:0009987,GO:0010143,GO:0016020,GO:0016491,GO:0016705,GO:0016709,GO:0019395,GO:0019748,GO:0019752,GO:0030258,GO:0032787,GO:0034440,GO:0043170,GO:0043436,GO:0044237,GO:0044238,GO:0044255,GO:0044281,GO:0044550,GO:0052722,GO:0055114,GO:0071704,GO:1901576	-	ko:K15399,ko:K21995	ko00073,map00073	-	R09460	RC00709	ko00000,ko00001,ko00199,ko01000	-	-	-	p450	2
255	scaffold14300:49398-51159_0	4432.XP_010266137.1	4.01e-56	208	KOG4197@1|root,KOG4197@2759|Eukaryota,37MJE@33090|Viridiplantae,3GE22@35493|Streptophyta	35493|Streptophyta	S	Pentatricopeptide repeat-containing protein	-	GO:0003674,GO:0003676,GO:0003723,GO:0003727,GO:0003729,GO:0003824,GO:0004518,GO:0004519,GO:0005488,GO:0005575,GO:0005622,GO:0005623,GO:0005737,GO:0006139,GO:0006396,GO:0006397,GO:0006417,GO:0006725,GO:0006807,GO:0006996,GO:0008150,GO:0008152,GO:0009295,GO:0009451,GO:0009507,GO:0009532,GO:0009536,GO:0009570,GO:0009579,GO:0009657,GO:0009658,GO:0009889,GO:0009891,GO:0009893,GO:0009987,GO:0010239,GO:…	-	-	-	-	-	-	-	-	-	-	PPR,PPR_2,PPR_3	2
256	scaffold143395:14130-16142_0	225117.XP_009373569.1	2.82e-198	578	KOG4197@1|root,KOG4197@2759|Eukaryota,37JMV@33090|Viridiplantae,3GEIQ@35493|Streptophyta,4JN6V@91835|fabids	35493|Streptophyta	S	Pentatricopeptide repeat-containing protein	-	-	-	-	-	-	-	-	-	-	-	-	DYW_deaminase,PPR	2
257	scaffold14503:202766-203098_0	42345.XP_008799563.1	1.19e-28	108	COG2007@1|root,KOG3283@2759|Eukaryota,37IHJ@33090|Viridiplantae,3G978@35493|Streptophyta,3M448@4447|Liliopsida	35493|Streptophyta	J	Belongs to the eukaryotic ribosomal protein eS8 family	-	GO:0000313,GO:0000462,GO:0003674,GO:0003735,GO:0005198,GO:0005575,GO:0005622,GO:0005623,GO:0005737,GO:0005829,GO:0005840,GO:0006139,GO:0006364,GO:0006396,GO:0006725,GO:0006807,GO:0006996,GO:0008150,GO:0008152,GO:0009507,GO:0009532,GO:0009536,GO:0009547,GO:0009570,GO:0009987,GO:0010467,GO:0015935,GO:0016043,GO:0016070,GO:0016072,GO:0022607,GO:0022613,GO:0022618,GO:0022626,GO:0022627,GO:0030490,GO:…	-	ko:K02995	ko03010,map03010	M00177,M00179	-	-	br01610,ko00000,ko00001,ko00002,ko03011	-	-	-	Ribosomal_S8e	2
258	scaffold145602:157390-160029_0	4432.XP_010269696.1	3.77e-279	801	KOG4197@1|root,KOG4197@2759|Eukaryota,37KPM@33090|Viridiplantae,3G7I0@35493|Streptophyta	35493|Streptophyta	J	Pentatricopeptide repeat-containing protein	-	GO:0003674,GO:0003676,GO:0003723,GO:0003824,GO:0004518,GO:0004519,GO:0005488,GO:0005575,GO:0005622,GO:0005623,GO:0006139,GO:0006725,GO:0006807,GO:0008150,GO:0008152,GO:0009451,GO:0009987,GO:0016070,GO:0016787,GO:0016788,GO:0034641,GO:0043170,GO:0043226,GO:0043227,GO:0043229,GO:0043231,GO:0043412,GO:0044237,GO:0044238,GO:0044424,GO:0044464,GO:0046483,GO:0071704,GO:0090304,GO:0090305,GO:0097159,GO:…	-	-	-	-	-	-	-	-	-	-	DYW_deaminase,PPR,PPR_2	2
259	scaffold146510:26171-26362_0	42345.XP_008810078.1	2.54e-16	77.4	2C0PQ@1|root,2QPX7@2759|Eukaryota,37M7X@33090|Viridiplantae,3G8GE@35493|Streptophyta,3KYPW@4447|Liliopsida	35493|Streptophyta	Q	Belongs to the peroxidase family. Classical plant (class III) peroxidase subfamily	-	-	1.11.1.7	ko:K00430	ko00940,ko01100,ko01110,map00940,map01100,map01110	-	R00602,R02596,R03919,R04007,R07443	RC00034	ko00000,ko00001,ko01000	-	-	-	peroxidase	2
260	scaffold146510:27052-27254_0	218851.Aquca_003_00386.1	1.34e-10	62.4	2C0PQ@1|root,2QPX7@2759|Eukaryota,37M7X@33090|Viridiplantae,3G8GE@35493|Streptophyta	35493|Streptophyta	Q	Belongs to the peroxidase family. Classical plant (class III) peroxidase subfamily	-	-	1.11.1.7	ko:K00430	ko00940,ko01100,ko01110,map00940,map01100,map01110	-	R00602,R02596,R03919,R04007,R07443	RC00034	ko00000,ko00001,ko01000	-	-	-	peroxidase	2
261	scaffold147125:50239-50676_0	3885.XP_007154955.1	1.39e-62	207	COG2124@1|root,KOG0157@2759|Eukaryota,37I60@33090|Viridiplantae,3GEDS@35493|Streptophyta,4JF0K@91835|fabids	35493|Streptophyta	Q	Cytochrome p450	-	GO:0003674,GO:0003824,GO:0004497,GO:0006629,GO:0008150,GO:0008152,GO:0008202,GO:0008395,GO:0009719,GO:0009725,GO:0009741,GO:0010033,GO:0010268,GO:0010817,GO:0014070,GO:0016128,GO:0016131,GO:0016491,GO:0033993,GO:0042221,GO:0042445,GO:0042592,GO:0044238,GO:0048878,GO:0050896,GO:0055088,GO:0055114,GO:0065007,GO:0065008,GO:0071704,GO:1901360,GO:1901615,GO:1901700	-	ko:K15639	ko00905,map00905	-	R09761,R09762	RC01216	ko00000,ko00001,ko00199,ko01000	-	-	-	p450	2
262	scaffold147125:50815-51205_0	40148.OGLUM01G19230.1	7.08e-36	136	COG2124@1|root,KOG0157@2759|Eukaryota,37I60@33090|Viridiplantae,3GEDS@35493|Streptophyta,3KYIU@4447|Liliopsida,3I3CQ@38820|Poales	35493|Streptophyta	Q	Belongs to the cytochrome P450 family	-	GO:0003674,GO:0003824,GO:0004497,GO:0006629,GO:0008150,GO:0008152,GO:0008202,GO:0008395,GO:0009719,GO:0009725,GO:0009741,GO:0010033,GO:0010268,GO:0010817,GO:0014070,GO:0016128,GO:0016131,GO:0016491,GO:0033993,GO:0042221,GO:0042445,GO:0042592,GO:0044238,GO:0048878,GO:0050896,GO:0055088,GO:0055114,GO:0065007,GO:0065008,GO:0071704,GO:1901360,GO:1901615,GO:1901700	-	ko:K15639	ko00905,map00905	-	R09761,R09762	RC01216	ko00000,ko00001,ko00199,ko01000	-	-	-	p450	2
263	scaffold147125:51723-51967_0	981085.XP_010098359.1	1.37e-11	65.1	COG2124@1|root,KOG0157@2759|Eukaryota,37IXF@33090|Viridiplantae,3G9DS@35493|Streptophyta,4JJV4@91835|fabids	35493|Streptophyta	Q	Cytochrome p450	-	GO:0003674,GO:0003824,GO:0004497,GO:0006629,GO:0008150,GO:0008152,GO:0008202,GO:0008395,GO:0009719,GO:0009725,GO:0009741,GO:0010033,GO:0010268,GO:0010817,GO:0014070,GO:0016128,GO:0016131,GO:0016491,GO:0033993,GO:0042221,GO:0042445,GO:0042592,GO:0044238,GO:0048878,GO:0050896,GO:0055088,GO:0055114,GO:0065007,GO:0065008,GO:0071704,GO:1901360,GO:1901615,GO:1901700	-	ko:K10717,ko:K20660	ko00908,ko01100,ko01110,map00908,map01100,map01110	-	R08053,R08054,R08055	RC01137	ko00000,ko00001,ko00199	-	-	-	p450	2
264	scaffold147125:52084-52307_0	4565.Traes_7AL_90DFCB464.1	3.34e-25	95.5	COG2124@1|root,KOG0157@2759|Eukaryota,37I60@33090|Viridiplantae,3GEDS@35493|Streptophyta,3KXPZ@4447|Liliopsida,3I4GV@38820|Poales	35493|Streptophyta	Q	Belongs to the cytochrome P450 family	-	GO:0003674,GO:0003824,GO:0004497,GO:0006629,GO:0008150,GO:0008152,GO:0008202,GO:0010268,GO:0010817,GO:0016128,GO:0016131,GO:0016491,GO:0042445,GO:0042592,GO:0044238,GO:0048878,GO:0055088,GO:0055114,GO:0065007,GO:0065008,GO:0071704,GO:1901360,GO:1901615	-	ko:K15639	ko00905,map00905	-	R09761,R09762	RC01216	ko00000,ko00001,ko00199,ko01000	-	-	-	p450	2
265	scaffold147125:52406-52883_0	72658.Bostr.2199s0005.1.p	1.41e-15	78.6	COG2124@1|root,KOG0157@2759|Eukaryota,37I60@33090|Viridiplantae,3GEDS@35493|Streptophyta,3HR2U@3699|Brassicales	35493|Streptophyta	Q	cytochrome P450	-	GO:0003674,GO:0003824,GO:0004497,GO:0006629,GO:0008150,GO:0008152,GO:0008202,GO:0008395,GO:0009719,GO:0009725,GO:0009741,GO:0010033,GO:0010268,GO:0010817,GO:0014070,GO:0016128,GO:0016131,GO:0016491,GO:0033993,GO:0042221,GO:0042445,GO:0042592,GO:0044238,GO:0048878,GO:0050896,GO:0055088,GO:0055114,GO:0065007,GO:0065008,GO:0071704,GO:1901360,GO:1901615,GO:1901700	-	ko:K15639	ko00905,map00905	-	R09761,R09762	RC01216	ko00000,ko00001,ko00199,ko01000	-	-	-	p450	2
266	scaffold147125:93875-94162_0	72658.Bostr.2199s0005.1.p	1.08e-12	68.6	COG2124@1|root,KOG0157@2759|Eukaryota,37I60@33090|Viridiplantae,3GEDS@35493|Streptophyta,3HR2U@3699|Brassicales	35493|Streptophyta	Q	cytochrome P450	-	GO:0003674,GO:0003824,GO:0004497,GO:0006629,GO:0008150,GO:0008152,GO:0008202,GO:0008395,GO:0009719,GO:0009725,GO:0009741,GO:0010033,GO:0010268,GO:0010817,GO:0014070,GO:0016128,GO:0016131,GO:0016491,GO:0033993,GO:0042221,GO:0042445,GO:0042592,GO:0044238,GO:0048878,GO:0050896,GO:0055088,GO:0055114,GO:0065007,GO:0065008,GO:0071704,GO:1901360,GO:1901615,GO:1901700	-	ko:K15639	ko00905,map00905	-	R09761,R09762	RC01216	ko00000,ko00001,ko00199,ko01000	-	-	-	p450	2
267	scaffold147125:94303-94562_0	4565.Traes_6DS_9424F4483.1	1.52e-23	92.8	COG2124@1|root,KOG0157@2759|Eukaryota,37I60@33090|Viridiplantae,3GEDS@35493|Streptophyta,3KUGT@4447|Liliopsida,3I9RB@38820|Poales	35493|Streptophyta	Q	Belongs to the cytochrome P450 family	-	GO:0003674,GO:0003824,GO:0004497,GO:0006629,GO:0008150,GO:0008152,GO:0008202,GO:0010268,GO:0010817,GO:0016128,GO:0016131,GO:0016491,GO:0042445,GO:0042592,GO:0044238,GO:0048878,GO:0055088,GO:0055114,GO:0065007,GO:0065008,GO:0071704,GO:1901360,GO:1901615	-	ko:K15639	ko00905,map00905	-	R09761,R09762	RC01216	ko00000,ko00001,ko00199,ko01000	-	-	-	p450	2
268	scaffold14780:93503-94869_0	3649.evm.model.supercontig_176.13	2.76e-42	164	COG1112@1|root,KOG1801@2759|Eukaryota,37JSK@33090|Viridiplantae,3GEBM@35493|Streptophyta,3HPR4@3699|Brassicales	35493|Streptophyta	A	AAA domain	-	-	-	ko:K10706	-	-	-	-	ko00000,ko01000,ko03021	-	-	-	AAA_11,AAA_12,SEN1_N	2
269	scaffold14780:94960-95207_0	3847.GLYMA19G02292.1	2.81e-26	99.8	COG1112@1|root,KOG1801@2759|Eukaryota,37JSK@33090|Viridiplantae,3GEBM@35493|Streptophyta,4JGN4@91835|fabids	35493|Streptophyta	A	AAA domain	-	-	-	ko:K10706	-	-	-	-	ko00000,ko01000,ko03021	-	-	-	AAA_11,AAA_12,SEN1_N	2
270	scaffold14780:96407-97305_0	29760.VIT_09s0054g00750.t01	7.17e-69	239	COG1112@1|root,KOG1801@2759|Eukaryota,37JSK@33090|Viridiplantae,3GEBM@35493|Streptophyta	35493|Streptophyta	A	AAA domain	-	-	-	ko:K10706	-	-	-	-	ko00000,ko01000,ko03021	-	-	-	AAA_11,AAA_12,SEN1_N	2
271	scaffold14780:97914-99364_0	29760.VIT_09s0054g00760.t01	8.1e-55	204	COG1112@1|root,KOG1801@2759|Eukaryota,37JSK@33090|Viridiplantae,3GEBM@35493|Streptophyta	35493|Streptophyta	A	AAA domain	-	-	-	ko:K10706	-	-	-	-	ko00000,ko01000,ko03021	-	-	-	AAA_11,AAA_12,SEN1_N	2
272	scaffold148672:19024-19203_0	4577.GRMZM2G062034_P01	8.62e-18	80.9	COG5059@1|root,KOG0239@2759|Eukaryota,37MG0@33090|Viridiplantae,3G9BN@35493|Streptophyta,3KWPH@4447|Liliopsida,3I92X@38820|Poales	35493|Streptophyta	Z	Belongs to the TRAFAC class myosin-kinesin ATPase superfamily. Kinesin family	-	GO:0003674,GO:0003774,GO:0003777,GO:0003824,GO:0005575,GO:0005622,GO:0005623,GO:0005856,GO:0005871,GO:0005875,GO:0006928,GO:0007017,GO:0007018,GO:0008150,GO:0009987,GO:0015630,GO:0016462,GO:0016787,GO:0016817,GO:0016818,GO:0016887,GO:0017111,GO:0032991,GO:0043226,GO:0043228,GO:0043229,GO:0043232,GO:0044422,GO:0044424,GO:0044430,GO:0044446,GO:0044464	-	ko:K10406	-	-	-	-	ko00000,ko04812	-	-	-	CH,Kinesin,Microtub_bd	2
273	scaffold148672:19299-19405_0	4565.Traes_4AL_2084BDDB5.1	8.23e-17	73.6	COG5059@1|root,KOG0239@2759|Eukaryota,37MG0@33090|Viridiplantae,3G9BN@35493|Streptophyta,3KRYX@4447|Liliopsida,3I8IX@38820|Poales	35493|Streptophyta	Z	Belongs to the TRAFAC class myosin-kinesin ATPase superfamily. Kinesin family	-	GO:0003674,GO:0003774,GO:0003777,GO:0003824,GO:0005575,GO:0005622,GO:0005623,GO:0005856,GO:0005871,GO:0005875,GO:0005886,GO:0006928,GO:0007017,GO:0007018,GO:0008150,GO:0009987,GO:0015630,GO:0016020,GO:0016462,GO:0016787,GO:0016817,GO:0016818,GO:0016887,GO:0017111,GO:0032991,GO:0043226,GO:0043228,GO:0043229,GO:0043232,GO:0044422,GO:0044424,GO:0044430,GO:0044446,GO:0044464,GO:0071944	-	ko:K10406	-	-	-	-	ko00000,ko04812	-	-	-	CH,Kinesin,Microtub_bd	2
274	scaffold148672:20668-20846_0	90675.XP_010452588.1	4.46e-20	82.8	COG5059@1|root,KOG0239@2759|Eukaryota,37KAM@33090|Viridiplantae,3G8QJ@35493|Streptophyta,3HR9E@3699|Brassicales	35493|Streptophyta	Z	Belongs to the TRAFAC class myosin-kinesin ATPase superfamily. Kinesin family	-	GO:0003674,GO:0003774,GO:0003777,GO:0003779,GO:0003824,GO:0005488,GO:0005515,GO:0005575,GO:0005622,GO:0005623,GO:0005856,GO:0005871,GO:0005875,GO:0006810,GO:0006928,GO:0007017,GO:0007018,GO:0007097,GO:0008017,GO:0008092,GO:0008150,GO:0008569,GO:0009987,GO:0015629,GO:0015630,GO:0015631,GO:0016462,GO:0016787,GO:0016817,GO:0016818,GO:0016887,GO:0017111,GO:0031534,GO:0032991,GO:0042623,GO:0043226,GO:…	-	ko:K10406	-	-	-	-	ko00000,ko04812	-	-	-	CH,Kinesin,Microtub_bd	2
275	scaffold148672:20953-21117_0	981085.XP_010110911.1	1.37e-17	79.7	COG5059@1|root,KOG0239@2759|Eukaryota,37KAM@33090|Viridiplantae,3G8QJ@35493|Streptophyta	35493|Streptophyta	Z	Belongs to the TRAFAC class myosin-kinesin ATPase superfamily. Kinesin family	-	GO:0003674,GO:0003774,GO:0003777,GO:0003779,GO:0003824,GO:0005488,GO:0005515,GO:0005575,GO:0005622,GO:0005623,GO:0005856,GO:0005871,GO:0005875,GO:0006810,GO:0006928,GO:0007017,GO:0007018,GO:0007097,GO:0008017,GO:0008092,GO:0008150,GO:0008569,GO:0009987,GO:0015629,GO:0015630,GO:0015631,GO:0016462,GO:0016787,GO:0016817,GO:0016818,GO:0016887,GO:0017111,GO:0031534,GO:0032991,GO:0042623,GO:0043226,GO:…	-	ko:K10406	-	-	-	-	ko00000,ko04812	-	-	-	CH,Kinesin,Microtub_bd	2
276	scaffold148672:21314-21567_0	981085.XP_010110911.1	3.06e-46	154	COG5059@1|root,KOG0239@2759|Eukaryota,37KAM@33090|Viridiplantae,3G8QJ@35493|Streptophyta	35493|Streptophyta	Z	Belongs to the TRAFAC class myosin-kinesin ATPase superfamily. Kinesin family	-	GO:0003674,GO:0003774,GO:0003777,GO:0003779,GO:0003824,GO:0005488,GO:0005515,GO:0005575,GO:0005622,GO:0005623,GO:0005856,GO:0005871,GO:0005875,GO:0006810,GO:0006928,GO:0007017,GO:0007018,GO:0007097,GO:0008017,GO:0008092,GO:0008150,GO:0008569,GO:0009987,GO:0015629,GO:0015630,GO:0015631,GO:0016462,GO:0016787,GO:0016817,GO:0016818,GO:0016887,GO:0017111,GO:0031534,GO:0032991,GO:0042623,GO:0043226,GO:…	-	ko:K10406	-	-	-	-	ko00000,ko04812	-	-	-	CH,Kinesin,Microtub_bd	2
277	scaffold148672:21662-21825_0	4565.Traes_5BS_1682EFEED.1	1.82e-21	86.7	COG5059@1|root,KOG0239@2759|Eukaryota,37KAM@33090|Viridiplantae,3G8QJ@35493|Streptophyta,3KVW0@4447|Liliopsida,3I2FM@38820|Poales	35493|Streptophyta	Z	Belongs to the TRAFAC class myosin-kinesin ATPase superfamily. Kinesin family	-	GO:0003674,GO:0003774,GO:0003777,GO:0003779,GO:0003824,GO:0005488,GO:0005515,GO:0005575,GO:0005622,GO:0005623,GO:0005856,GO:0005871,GO:0005875,GO:0006810,GO:0006928,GO:0007017,GO:0007018,GO:0007097,GO:0008017,GO:0008092,GO:0008150,GO:0008569,GO:0009987,GO:0015629,GO:0015630,GO:0015631,GO:0016462,GO:0016787,GO:0016817,GO:0016818,GO:0016887,GO:0017111,GO:0031534,GO:0032991,GO:0042623,GO:0043226,GO:…	-	ko:K10406	-	-	-	-	ko00000,ko04812	-	-	-	CH,Kinesin	2
278	scaffold148877:96690-96849_0	4641.GSMUA_AchrUn_randomP27780_001	1.21e-12	64.7	KOG0443@1|root,KOG0443@2759|Eukaryota,37IMR@33090|Viridiplantae,3G95S@35493|Streptophyta,3KX0B@4447|Liliopsida	35493|Streptophyta	Z	Gelsolin homology domain	VLN2	GO:0001558,GO:0003674,GO:0003779,GO:0005488,GO:0005515,GO:0005575,GO:0005622,GO:0005623,GO:0005737,GO:0005856,GO:0005884,GO:0006996,GO:0007010,GO:0007015,GO:0008064,GO:0008092,GO:0008150,GO:0009605,GO:0009606,GO:0009628,GO:0009629,GO:0009630,GO:0009987,GO:0010639,GO:0010817,GO:0015629,GO:0016043,GO:0022607,GO:0030029,GO:0030036,GO:0030832,GO:0030833,GO:0030834,GO:0030835,GO:0030837,GO:0031333,GO:…	-	ko:K05761,ko:K05768	ko04666,ko04810,ko05203,map04666,map04810,map05203	-	-	-	ko00000,ko00001,ko04147,ko04812	-	-	-	Gelsolin,VHP	2
279	scaffold148877:97760-97937_0	4641.GSMUA_Achr5P08240_001	1.93e-29	110	KOG0443@1|root,KOG0443@2759|Eukaryota,37IMR@33090|Viridiplantae,3G95S@35493|Streptophyta,3KX0B@4447|Liliopsida	35493|Streptophyta	Z	Gelsolin homology domain	VLN2	GO:0001558,GO:0003674,GO:0003779,GO:0005488,GO:0005515,GO:0005575,GO:0005622,GO:0005623,GO:0005737,GO:0005856,GO:0005884,GO:0006996,GO:0007010,GO:0007015,GO:0008064,GO:0008092,GO:0008150,GO:0009605,GO:0009606,GO:0009628,GO:0009629,GO:0009630,GO:0009987,GO:0010639,GO:0010817,GO:0015629,GO:0016043,GO:0022607,GO:0030029,GO:0030036,GO:0030832,GO:0030833,GO:0030834,GO:0030835,GO:0030837,GO:0031333,GO:…	-	ko:K05761,ko:K05768	ko04666,ko04810,ko05203,map04666,map04810,map05203	-	-	-	ko00000,ko00001,ko04147,ko04812	-	-	-	Gelsolin,VHP	2
280	scaffold148877:98244-98480_0	4641.GSMUA_Achr3P08560_001	1.38e-28	109	KOG0443@1|root,KOG0443@2759|Eukaryota,37IMR@33090|Viridiplantae,3G95S@35493|Streptophyta,3KX0B@4447|Liliopsida	35493|Streptophyta	Z	Gelsolin homology domain	VLN2	GO:0001558,GO:0003674,GO:0003779,GO:0005488,GO:0005515,GO:0005575,GO:0005622,GO:0005623,GO:0005737,GO:0005856,GO:0005884,GO:0006996,GO:0007010,GO:0007015,GO:0008064,GO:0008092,GO:0008150,GO:0009605,GO:0009606,GO:0009628,GO:0009629,GO:0009630,GO:0009987,GO:0010639,GO:0010817,GO:0015629,GO:0016043,GO:0022607,GO:0030029,GO:0030036,GO:0030832,GO:0030833,GO:0030834,GO:0030835,GO:0030837,GO:0031333,GO:…	-	ko:K05761,ko:K05768	ko04666,ko04810,ko05203,map04666,map04810,map05203	-	-	-	ko00000,ko00001,ko04147,ko04812	-	-	-	Gelsolin,VHP	2
281	scaffold1488:28474-28682_0	4558.Sb04g004440.1	1.45e-12	67.4	COG0515@1|root,KOG1187@2759|Eukaryota,37SD0@33090|Viridiplantae,3G85I@35493|Streptophyta,3KPZ5@4447|Liliopsida,3IAMH@38820|Poales	35493|Streptophyta	T	Belongs to the protein kinase superfamily	-	GO:0002237,GO:0003674,GO:0003824,GO:0004672,GO:0004674,GO:0005575,GO:0005623,GO:0005886,GO:0006464,GO:0006468,GO:0006793,GO:0006796,GO:0006807,GO:0006950,GO:0008150,GO:0008152,GO:0009266,GO:0009409,GO:0009605,GO:0009607,GO:0009617,GO:0009625,GO:0009628,GO:0009987,GO:0010033,GO:0016020,GO:0016301,GO:0016310,GO:0016740,GO:0016772,GO:0016773,GO:0019538,GO:0032386,GO:0032388,GO:0032879,GO:0032880,GO:…	2.7.11.1	ko:K04733	ko04010,ko04064,ko04620,ko04621,ko04624,ko04722,ko05133,ko05140,ko05142,ko05145,ko05152,ko05162,ko05164,map04010,map04064,map04620,map04621,map04624,map04722,map05133,map05140,map05142,map05145,map05152,map05162,map05164	M00686	-	-	ko00000,ko00001,ko00002,ko01000,ko01001	-	-	-	Pkinase,Pkinase_Tyr	2
282	scaffold1488:28783-28909_0	4577.GRMZM2G459224_P01	2.48e-12	63.2	29RRD@1|root,2RXBX@2759|Eukaryota,37QXC@33090|Viridiplantae,3GG63@35493|Streptophyta,3KRWH@4447|Liliopsida,3I7NH@38820|Poales	35493|Streptophyta	T	Belongs to the protein kinase superfamily. Ser Thr protein kinase family	-	-	-	-	-	-	-	-	-	-	-	-	LRRNT_2,LRR_8,Pkinase,Pkinase_Tyr	2
283	scaffold1488:29236-29425_0	88036.EFJ22343	1.7e-22	91.3	COG0515@1|root,2QW5Y@2759|Eukaryota,37MHW@33090|Viridiplantae,3GGGV@35493|Streptophyta	35493|Streptophyta	T	LRR receptor-like serine threonine-protein kinase	-	-	-	-	-	-	-	-	-	-	-	-	LRR_4,LRR_8,Malectin_like,Pkinase,Pkinase_Tyr	2
284	scaffold1488:29574-29706_0	4565.Traes_5DS_6405E5263.1	1.09e-13	65.9	COG0515@1|root,KOG1187@2759|Eukaryota,37QD0@33090|Viridiplantae,3G81B@35493|Streptophyta,3M2E0@4447|Liliopsida,3IKRT@38820|Poales	35493|Streptophyta	T	Protein tyrosine kinase	-	GO:0000003,GO:0001558,GO:0003674,GO:0003824,GO:0004672,GO:0005575,GO:0005618,GO:0005623,GO:0005886,GO:0005911,GO:0006464,GO:0006468,GO:0006793,GO:0006796,GO:0006807,GO:0006950,GO:0006952,GO:0007275,GO:0008150,GO:0008152,GO:0009506,GO:0009605,GO:0009607,GO:0009620,GO:0009719,GO:0009723,GO:0009725,GO:0009741,GO:0009787,GO:0009788,GO:0009791,GO:0009856,GO:0009966,GO:0009968,GO:0009987,GO:0010033,GO:…	-	-	-	-	-	-	-	-	-	-	Malectin_like,Pkinase_Tyr	2
285	scaffold149434:52229-52905_0	4432.XP_010253089.1	3.98e-39	140	KOG0800@1|root,KOG0800@2759|Eukaryota,37Q47@33090|Viridiplantae,3GCXD@35493|Streptophyta	35493|Streptophyta	O	RING-H2 finger protein	-	-	2.3.2.27	ko:K19040	-	-	-	-	ko00000,ko01000,ko04121	-	-	-	zf-RING_2	2
286	scaffold149439:49824-53009_0	13333.ERM97083	0	916	28JTE@1|root,2QUZB@2759|Eukaryota,37R76@33090|Viridiplantae,3GC08@35493|Streptophyta	35493|Streptophyta	S	Protein of unknown function (DUF2921)	-	-	-	-	-	-	-	-	-	-	-	-	DUF2921	2
287	scaffold150126:102530-104806_0	218851.Aquca_010_00669.1	1.4e-208	612	KOG4197@1|root,KOG4197@2759|Eukaryota,37N5Q@33090|Viridiplantae,3GH38@35493|Streptophyta	35493|Streptophyta	O	Pentatricopeptide repeat-containing protein	-	GO:0003674,GO:0003676,GO:0003723,GO:0003824,GO:0004518,GO:0004519,GO:0005488,GO:0005575,GO:0005622,GO:0005623,GO:0005737,GO:0006139,GO:0006725,GO:0006807,GO:0008150,GO:0008152,GO:0009451,GO:0009507,GO:0009536,GO:0009987,GO:0016070,GO:0016071,GO:0016556,GO:0016787,GO:0016788,GO:0034641,GO:0043170,GO:0043226,GO:0043227,GO:0043229,GO:0043231,GO:0043412,GO:0044237,GO:0044238,GO:0044424,GO:0044444,GO:…	-	-	-	-	-	-	-	-	-	-	DYW_deaminase,PPR,PPR_2	2
288	scaffold152216:347510-347708_0	4565.Traes_5DS_4825FE09C.1	1.48e-14	73.2	COG5215@1|root,KOG1241@2759|Eukaryota,37NK3@33090|Viridiplantae,3G7CI@35493|Streptophyta,3KV3V@4447|Liliopsida,3I3WJ@38820|Poales	35493|Streptophyta	UY	HEAT-like repeat	-	GO:0000060,GO:0000070,GO:0000226,GO:0000278,GO:0000280,GO:0000819,GO:0003674,GO:0005048,GO:0005215,GO:0005488,GO:0005515,GO:0005575,GO:0005622,GO:0005623,GO:0005634,GO:0005635,GO:0005643,GO:0005654,GO:0005737,GO:0005783,GO:0005829,GO:0006606,GO:0006607,GO:0006610,GO:0006810,GO:0006886,GO:0006913,GO:0006928,GO:0006996,GO:0007010,GO:0007017,GO:0007018,GO:0007049,GO:0007051,GO:0007052,GO:0007059,GO:…	-	ko:K14293	ko03013,map03013	-	-	-	ko00000,ko00001,ko03009,ko03036	1.I.1	-	-	HEAT,HEAT_EZ,IBN_N	2
289	scaffold152216:347860-350282_0	3218.PP1S207_106V6.1	0	1231	COG5215@1|root,KOG1241@2759|Eukaryota,37NK3@33090|Viridiplantae,3G7CI@35493|Streptophyta	35493|Streptophyta	UY	importin subunit	-	GO:0000060,GO:0000070,GO:0000226,GO:0000278,GO:0000280,GO:0000819,GO:0003674,GO:0005048,GO:0005215,GO:0005488,GO:0005515,GO:0005575,GO:0005622,GO:0005623,GO:0005634,GO:0005635,GO:0005643,GO:0005654,GO:0005737,GO:0005783,GO:0005829,GO:0006606,GO:0006607,GO:0006610,GO:0006810,GO:0006886,GO:0006913,GO:0006928,GO:0006996,GO:0007010,GO:0007017,GO:0007018,GO:0007049,GO:0007051,GO:0007052,GO:0007059,GO:…	-	ko:K14293	ko03013,map03013	-	-	-	ko00000,ko00001,ko03009,ko03036	1.I.1	-	-	HEAT,HEAT_EZ,IBN_N	2
290	scaffold153179:38135-38452_0	29760.VIT_16s0022g00230.t01	2.91e-61	189	COG1196@1|root,KOG0933@2759|Eukaryota,37IA8@33090|Viridiplantae,3GAX1@35493|Streptophyta	35493|Streptophyta	BD	Structural maintenance of chromosomes protein	-	GO:0000793,GO:0000796,GO:0003674,GO:0005215,GO:0005575,GO:0005622,GO:0005623,GO:0005634,GO:0005694,GO:0032991,GO:0043226,GO:0043227,GO:0043228,GO:0043229,GO:0043231,GO:0043232,GO:0044422,GO:0044424,GO:0044427,GO:0044446,GO:0044464,GO:0044815	-	ko:K06674	ko04111,map04111	-	-	-	ko00000,ko00001,ko03036	-	-	-	SMC_N,SMC_hinge	2
291	scaffold153543:77832-78108_0	2711.XP_006472165.1	3.53e-35	129	COG5325@1|root,KOG0809@2759|Eukaryota,37JM2@33090|Viridiplantae,3G737@35493|Streptophyta	35493|Streptophyta	U	Belongs to the syntaxin family	-	GO:0000139,GO:0000149,GO:0002790,GO:0003674,GO:0005488,GO:0005515,GO:0005575,GO:0005622,GO:0005623,GO:0005737,GO:0005768,GO:0005794,GO:0005802,GO:0006810,GO:0006906,GO:0006996,GO:0007030,GO:0007034,GO:0008104,GO:0008150,GO:0009306,GO:0009987,GO:0010256,GO:0012505,GO:0015031,GO:0015833,GO:0016020,GO:0016021,GO:0016043,GO:0016050,GO:0016192,GO:0022406,GO:0031090,GO:0031201,GO:0031224,GO:0031410,GO:…	-	ko:K08489	ko04130,map04130	-	-	-	ko00000,ko00001,ko04131	-	-	-	SNARE	2
292	scaffold154230:19873-20277_0	4565.Traes_3DS_E0837435C.1	9.12e-10	61.6	COG4886@1|root,2QPYS@2759|Eukaryota,37Q18@33090|Viridiplantae,3GCT9@35493|Streptophyta,3M3ZW@4447|Liliopsida,3I8D7@38820|Poales	35493|Streptophyta	T	Belongs to the protein kinase superfamily. Ser Thr protein kinase family	-	-	-	-	-	-	-	-	-	-	-	-	LRRNT_2,LRR_1,LRR_4,LRR_8,Pkinase,Pkinase_Tyr	2
293	scaffold154680:84932-85759_0	3983.cassava4.1_021636m	2.69e-13	73.6	COG0515@1|root,2QWDY@2759|Eukaryota,37QJ4@33090|Viridiplantae,3G71R@35493|Streptophyta,4JSFW@91835|fabids	35493|Streptophyta	T	Cysteine-rich receptor-like protein kinase	-	GO:0003674,GO:0003824,GO:0004672,GO:0004674,GO:0005575,GO:0005623,GO:0005886,GO:0006464,GO:0006468,GO:0006793,GO:0006796,GO:0006807,GO:0006950,GO:0006952,GO:0008150,GO:0008152,GO:0009605,GO:0009607,GO:0009617,GO:0009987,GO:0016020,GO:0016301,GO:0016310,GO:0016740,GO:0016772,GO:0016773,GO:0019538,GO:0036211,GO:0042742,GO:0043170,GO:0043207,GO:0043412,GO:0044237,GO:0044238,GO:0044260,GO:0044267,GO:…	-	-	-	-	-	-	-	-	-	-	Pkinase,Pkinase_Tyr,Stress-antifung	2
294	scaffold154680:88434-88671_0	4565.Traes_3AS_A0EA6D12C.1	9.32e-34	121	COG0515@1|root,2QS49@2759|Eukaryota,37MR2@33090|Viridiplantae,3G8CH@35493|Streptophyta,3KTYD@4447|Liliopsida,3I8IS@38820|Poales	35493|Streptophyta	T	Protein kinase domain	-	GO:0003674,GO:0003824,GO:0004672,GO:0004674,GO:0005575,GO:0005623,GO:0005886,GO:0006464,GO:0006468,GO:0006793,GO:0006796,GO:0006807,GO:0006950,GO:0006952,GO:0008150,GO:0008152,GO:0009605,GO:0009607,GO:0009617,GO:0009987,GO:0016020,GO:0016301,GO:0016310,GO:0016740,GO:0016772,GO:0016773,GO:0019538,GO:0036211,GO:0042742,GO:0043170,GO:0043207,GO:0043412,GO:0044237,GO:0044238,GO:0044260,GO:0044267,GO:…	2.7.11.1	ko:K04733	ko04010,ko04064,ko04620,ko04621,ko04624,ko04722,ko05133,ko05140,ko05142,ko05145,ko05152,ko05162,ko05164,map04010,map04064,map04620,map04621,map04624,map04722,map05133,map05140,map05142,map05145,map05152,map05162,map05164	M00686	-	-	ko00000,ko00001,ko00002,ko01000,ko01001	-	-	-	Pkinase_Tyr	2
295	scaffold154680:88863-88998_0	4565.Traes_3DS_75CCBCC96.1	3.07e-13	65.1	COG0515@1|root,2QS49@2759|Eukaryota,37MR2@33090|Viridiplantae,3G8CH@35493|Streptophyta,3KTYD@4447|Liliopsida,3I8IS@38820|Poales	35493|Streptophyta	T	Protein kinase domain	-	GO:0003674,GO:0003824,GO:0004672,GO:0004674,GO:0005575,GO:0005623,GO:0005886,GO:0006464,GO:0006468,GO:0006793,GO:0006796,GO:0006807,GO:0006950,GO:0006952,GO:0008150,GO:0008152,GO:0009605,GO:0009607,GO:0009617,GO:0009987,GO:0016020,GO:0016301,GO:0016310,GO:0016740,GO:0016772,GO:0016773,GO:0019538,GO:0036211,GO:0042742,GO:0043170,GO:0043207,GO:0043412,GO:0044237,GO:0044238,GO:0044260,GO:0044267,GO:…	2.7.11.1	ko:K04733	ko04010,ko04064,ko04620,ko04621,ko04624,ko04722,ko05133,ko05140,ko05142,ko05145,ko05152,ko05162,ko05164,map04010,map04064,map04620,map04621,map04624,map04722,map05133,map05140,map05142,map05145,map05152,map05162,map05164	M00686	-	-	ko00000,ko00001,ko00002,ko01000,ko01001	-	-	-	Pkinase_Tyr	2
296	scaffold154680:89261-89650_0	3694.POPTR_0004s02440.1	3.82e-14	75.1	COG0515@1|root,2QWDY@2759|Eukaryota,37QJ4@33090|Viridiplantae,3G71R@35493|Streptophyta,4JSFW@91835|fabids	35493|Streptophyta	T	Cysteine-rich receptor-like protein kinase	-	GO:0003674,GO:0003824,GO:0004672,GO:0004674,GO:0005575,GO:0005623,GO:0005886,GO:0006464,GO:0006468,GO:0006793,GO:0006796,GO:0006807,GO:0006950,GO:0006952,GO:0008150,GO:0008152,GO:0009605,GO:0009607,GO:0009617,GO:0009987,GO:0016020,GO:0016301,GO:0016310,GO:0016740,GO:0016772,GO:0016773,GO:0019538,GO:0036211,GO:0042742,GO:0043170,GO:0043207,GO:0043412,GO:0044237,GO:0044238,GO:0044260,GO:0044267,GO:…	-	-	-	-	-	-	-	-	-	-	Pkinase,Pkinase_Tyr,Stress-antifung	2
297	scaffold15499:64559-66574_1	42345.XP_008775355.1	1.45e-07	63.9	COG4886@1|root,KOG0619@2759|Eukaryota,37JQI@33090|Viridiplantae,3G97Z@35493|Streptophyta,3KMSW@4447|Liliopsida	35493|Streptophyta	Q	LRR receptor-like serine threonine-protein kinase	-	GO:0000003,GO:0001704,GO:0001706,GO:0003002,GO:0003006,GO:0003674,GO:0003824,GO:0004672,GO:0004674,GO:0004675,GO:0004888,GO:0005575,GO:0005618,GO:0005623,GO:0005886,GO:0006464,GO:0006468,GO:0006793,GO:0006796,GO:0006807,GO:0006810,GO:0006833,GO:0006950,GO:0007154,GO:0007165,GO:0007166,GO:0007167,GO:0007178,GO:0007275,GO:0007369,GO:0007389,GO:0007492,GO:0008104,GO:0008150,GO:0008152,GO:0009505,GO:…	2.4.2.9	ko:K00761	ko00240,ko01100,map00240,map01100	-	R00966	RC00063	ko00000,ko00001,ko01000	-	-	-	LRRNT_2,LRR_1,LRR_6,LRR_8	2
298	scaffold15499:64559-66574_0	71139.XP_010068268.1	1.59e-08	67	COG4886@1|root,KOG0619@2759|Eukaryota,37JQI@33090|Viridiplantae,3G97Z@35493|Streptophyta	35493|Streptophyta	Q	LRR receptor-like serine threonine-protein kinase	-	-	-	-	-	-	-	-	-	-	-	-	LRRNT_2,LRR_1,LRR_4,LRR_6,LRR_8	2
299	scaffold15499:66752-67357_0	225117.XP_009365388.1	4.05e-38	141	COG4886@1|root,KOG0619@2759|Eukaryota	2759|Eukaryota	U	regulation of response to stimulus	LRRC58	-	-	-	-	-	-	-	-	-	-	-	LRR_1,LRR_4,LRR_8,Pkinase,Pkinase_Tyr	2
300	scaffold155360:27326-27602_0	4565.Traes_6BL_3937AF4A5.1	1.83e-20	85.5	KOG4711@1|root,KOG4711@2759|Eukaryota,37IQP@33090|Viridiplantae,3G9CN@35493|Streptophyta	35493|Streptophyta	S	aluminum-activated malate transporter	-	-	-	-	-	-	-	-	-	-	-	-	ALMT	2
301	scaffold155360:30220-30486_0	3649.evm.model.supercontig_175.5	3.46e-21	93.2	KOG4711@1|root,KOG4711@2759|Eukaryota,37IQP@33090|Viridiplantae,3G9CN@35493|Streptophyta,3HMIY@3699|Brassicales	35493|Streptophyta	S	Aluminium activated malate transporter	-	GO:0000325,GO:0003674,GO:0005215,GO:0005310,GO:0005342,GO:0005575,GO:0005622,GO:0005623,GO:0005737,GO:0005773,GO:0005774,GO:0006810,GO:0006811,GO:0006820,GO:0006835,GO:0008150,GO:0008509,GO:0008514,GO:0009705,GO:0015075,GO:0015140,GO:0015318,GO:0015556,GO:0015711,GO:0015740,GO:0015743,GO:0015849,GO:0016020,GO:0022857,GO:0031090,GO:0034220,GO:0043226,GO:0043227,GO:0043229,GO:0043231,GO:0044422,GO:…	-	-	-	-	-	-	-	-	-	-	ALMT,FUSC_2	2
302	scaffold155360:30799-31539_0	38727.Pavir.Db00479.1.p	2.82e-23	105	KOG4711@1|root,KOG4711@2759|Eukaryota,37R8C@33090|Viridiplantae,3G8G2@35493|Streptophyta,3KV6T@4447|Liliopsida,3I6HQ@38820|Poales	35493|Streptophyta	S	Aluminium activated malate transporter	-	GO:0000325,GO:0003674,GO:0005215,GO:0005310,GO:0005342,GO:0005575,GO:0005622,GO:0005623,GO:0005737,GO:0005773,GO:0005774,GO:0006810,GO:0006811,GO:0006820,GO:0006835,GO:0008150,GO:0008509,GO:0008514,GO:0009705,GO:0009987,GO:0010118,GO:0012505,GO:0015075,GO:0015140,GO:0015318,GO:0015556,GO:0015711,GO:0015740,GO:0015743,GO:0015849,GO:0016020,GO:0022857,GO:0031090,GO:0034220,GO:0043226,GO:0043227,GO:…	-	-	-	-	-	-	-	-	-	-	ALMT	2
303	scaffold155693:46728-48106_0	3218.PP1S270_88V6.3	4.29e-161	472	2CMQT@1|root,2QRGZ@2759|Eukaryota,37PMJ@33090|Viridiplantae,3G99N@35493|Streptophyta	35493|Streptophyta	G	Belongs to the glycosyl hydrolase 17 family	-	-	-	-	-	-	-	-	-	-	-	-	Glyco_hydro_17,X8	2
304	scaffold155693:46739-48106_0	3218.PP1S270_88V6.3	1.06e-160	471	2CMQT@1|root,2QRGZ@2759|Eukaryota,37PMJ@33090|Viridiplantae,3G99N@35493|Streptophyta	35493|Streptophyta	G	Belongs to the glycosyl hydrolase 17 family	-	-	-	-	-	-	-	-	-	-	-	-	Glyco_hydro_17,X8	2
305	scaffold155832:318447-319089_0	13333.ERM95446	2.72e-81	255	28PNQ@1|root,2QWAT@2759|Eukaryota,37Q8E@33090|Viridiplantae,3GAFX@35493|Streptophyta	35493|Streptophyta	S	lysM domain-containing GPI-anchored protein	-	GO:0002376,GO:0003674,GO:0005488,GO:0005539,GO:0005575,GO:0005623,GO:0005886,GO:0006955,GO:0008150,GO:0016020,GO:0031224,GO:0031225,GO:0031226,GO:0042834,GO:0044425,GO:0044459,GO:0044464,GO:0046658,GO:0050896,GO:0071944,GO:0097367	-	-	-	-	-	-	-	-	-	-	LysM	2
306	scaffold155905:199451-199712_0	3983.cassava4.1_033130m	3.45e-19	83.2	COG3240@1|root,2QW19@2759|Eukaryota,37PPT@33090|Viridiplantae,3G7GI@35493|Streptophyta	35493|Streptophyta	I	Belongs to the GDSL lipolytic enzyme family	-	-	-	-	-	-	-	-	-	-	-	-	Lipase_GDSL	2
307	scaffold155905:204196-204376_0	3988.XP_002531157.1	8.66e-18	80.5	COG3240@1|root,2QW19@2759|Eukaryota,37PPT@33090|Viridiplantae,3G7GI@35493|Streptophyta,4JDNK@91835|fabids	35493|Streptophyta	I	GDSL esterase lipase EXL3-like	-	-	-	-	-	-	-	-	-	-	-	-	Lipase_GDSL	2
308	scaffold156429:41261-41446_0	3983.cassava4.1_025191m	3.16e-16	77.4	2CM8U@1|root,2QPMY@2759|Eukaryota,37NER@33090|Viridiplantae,3GHNR@35493|Streptophyta,4JT4U@91835|fabids	35493|Streptophyta	S	NmrA-like family	-	-	-	-	-	-	-	-	-	-	-	-	NmrA	2
309	scaffold156429:41856-42093_0	102107.XP_008220823.1	4.71e-40	140	2CM8U@1|root,2QPMY@2759|Eukaryota,37NER@33090|Viridiplantae,3G9WF@35493|Streptophyta,4JH1Q@91835|fabids	35493|Streptophyta	S	isoflavone	-	GO:0005575,GO:0005623,GO:0005886,GO:0006950,GO:0006979,GO:0008150,GO:0010035,GO:0010038,GO:0016020,GO:0042221,GO:0044464,GO:0046686,GO:0050896,GO:0071944	-	-	-	-	-	-	-	-	-	-	NmrA	2
310	scaffold156429:42676-42879_0	218851.Aquca_010_00524.1	4.79e-27	106	2CM8U@1|root,2QPMY@2759|Eukaryota,37NER@33090|Viridiplantae,3G9WF@35493|Streptophyta	35493|Streptophyta	S	isoflavone	-	GO:0005575,GO:0005623,GO:0005886,GO:0006950,GO:0006979,GO:0008150,GO:0010035,GO:0010038,GO:0016020,GO:0042221,GO:0044464,GO:0046686,GO:0050896,GO:0071944	-	-	-	-	-	-	-	-	-	-	NmrA	2
311	scaffold156429:43241-43404_0	71139.XP_010040604.1	1.02e-17	80.1	2CM8U@1|root,2QPMY@2759|Eukaryota,37NER@33090|Viridiplantae,3G9WF@35493|Streptophyta	35493|Streptophyta	S	isoflavone	-	-	-	-	-	-	-	-	-	-	-	-	NmrA	2
312	scaffold156429:63302-63518_0	88036.EFJ33100	1.96e-21	89.4	KOG1623@1|root,KOG1623@2759|Eukaryota,37QSD@33090|Viridiplantae,3GE4U@35493|Streptophyta	35493|Streptophyta	U	Mediates both low-affinity uptake and efflux of sugar across the membrane	-	GO:0003674,GO:0005215,GO:0005575,GO:0005622,GO:0005623,GO:0005737,GO:0005886,GO:0005887,GO:0006810,GO:0008150,GO:0008643,GO:0009507,GO:0009536,GO:0009987,GO:0015144,GO:0016020,GO:0016021,GO:0016043,GO:0022607,GO:0022857,GO:0031224,GO:0031226,GO:0034219,GO:0043226,GO:0043227,GO:0043229,GO:0043231,GO:0043933,GO:0044085,GO:0044424,GO:0044425,GO:0044444,GO:0044459,GO:0044464,GO:0051119,GO:0051179,GO:…	-	ko:K15382	-	-	-	-	ko00000,ko02000	9.A.58.1	-	-	MtN3_slv	2
313	scaffold15663:46821-47501_0	4641.GSMUA_Achr5P07320_001	3.18e-81	250	COG5080@1|root,KOG3103@2759|Eukaryota,37IB2@33090|Viridiplantae,3GGGC@35493|Streptophyta,3KTT5@4447|Liliopsida	35493|Streptophyta	U	Yip1 domain	-	-	-	ko:K20363	-	-	-	-	ko00000,ko04131	-	-	-	Yip1	2
314	scaffold157738:3838-4092_0	4641.GSMUA_Achr5P04500_001	1.52e-34	126	COG1073@1|root,KOG1552@2759|Eukaryota,37M3W@33090|Viridiplantae,3GDYV@35493|Streptophyta,3KPD9@4447|Liliopsida	35493|Streptophyta	S	Alpha beta hydrolase domain-containing protein	-	-	-	-	-	-	-	-	-	-	-	-	Hydrolase_4	2
315	scaffold157738:88096-88332_0	13333.ERN08433	7.21e-39	137	COG1073@1|root,KOG1552@2759|Eukaryota,37M3W@33090|Viridiplantae,3GDYV@35493|Streptophyta	35493|Streptophyta	S	Alpha beta hydrolase domain-containing protein	-	-	-	-	-	-	-	-	-	-	-	-	Hydrolase_4	2
316	scaffold157738:90428-90723_0	3750.XP_008344062.1	1.83e-44	146	COG1073@1|root,KOG1552@2759|Eukaryota,37M3W@33090|Viridiplantae,3GDYV@35493|Streptophyta,4JDUW@91835|fabids	35493|Streptophyta	S	domain-containing protein	-	-	-	-	-	-	-	-	-	-	-	-	Hydrolase_4	2
317	scaffold157741:54779-55962_0	3847.GLYMA08G09990.1	5.9e-122	374	COG0515@1|root,KOG1187@2759|Eukaryota,37HHN@33090|Viridiplantae,3G8M3@35493|Streptophyta,4JDYF@91835|fabids	35493|Streptophyta	T	Serine threonine-protein kinase	-	-	-	-	-	-	-	-	-	-	-	-	GUB_WAK_bind,Pkinase,Pkinase_Tyr,WAK_assoc	2
318	scaffold15832:147732-150908_0	3983.cassava4.1_030915m	1.04e-06	62	COG4886@1|root,KOG0619@2759|Eukaryota,37SI1@33090|Viridiplantae,3GMZI@35493|Streptophyta	35493|Streptophyta	S	LRR receptor-like serine threonine-protein kinase	-	-	-	-	-	-	-	-	-	-	-	-	LRRNT_2,LRR_1,LRR_4,LRR_8	2
319	scaffold158725:192570-192731_0	4572.TRIUR3_23592-P1	1.34e-12	62.8	COG0532@1|root,KOG1145@2759|Eukaryota	2759|Eukaryota	J	translation initiation factor activity	-	GO:0005575,GO:0005622,GO:0005623,GO:0005737,GO:0009507,GO:0009526,GO:0009532,GO:0009536,GO:0009570,GO:0009941,GO:0031967,GO:0031975,GO:0043226,GO:0043227,GO:0043229,GO:0043231,GO:0044422,GO:0044424,GO:0044434,GO:0044435,GO:0044444,GO:0044446,GO:0044464	-	ko:K02519	-	-	-	-	ko00000,ko03012,ko03029	-	-	-	GTP_EFTU,IF-2,IF2_N	2
320	scaffold158725:194399-194587_0	4565.Traes_7BS_5E72F0204.1	3.08e-25	99	COG0532@1|root,KOG1145@2759|Eukaryota,37P2E@33090|Viridiplantae,3GEWZ@35493|Streptophyta,3KS2F@4447|Liliopsida,3IFC3@38820|Poales	35493|Streptophyta	J	Translation initiation factor IF-2	-	GO:0005575,GO:0005622,GO:0005623,GO:0005737,GO:0009507,GO:0009526,GO:0009532,GO:0009536,GO:0009570,GO:0009941,GO:0031967,GO:0031975,GO:0043226,GO:0043227,GO:0043229,GO:0043231,GO:0044422,GO:0044424,GO:0044434,GO:0044435,GO:0044444,GO:0044446,GO:0044464	-	ko:K02519	-	-	-	-	ko00000,ko03012,ko03029	-	-	-	GTP_EFTU,IF-2,IF2_N	2
321	scaffold158725:194731-195006_0	4565.Traes_7AS_B41472279.1	2.54e-34	122	COG0532@1|root,KOG1145@2759|Eukaryota,37P2E@33090|Viridiplantae,3GEWZ@35493|Streptophyta,3KS2F@4447|Liliopsida,3IFC3@38820|Poales	35493|Streptophyta	J	Translation initiation factor IF-2	-	GO:0005575,GO:0005622,GO:0005623,GO:0005737,GO:0009507,GO:0009526,GO:0009532,GO:0009536,GO:0009570,GO:0009941,GO:0031967,GO:0031975,GO:0043226,GO:0043227,GO:0043229,GO:0043231,GO:0044422,GO:0044424,GO:0044434,GO:0044435,GO:0044444,GO:0044446,GO:0044464	-	ko:K02519	-	-	-	-	ko00000,ko03012,ko03029	-	-	-	GTP_EFTU,IF-2,IF2_N	2
322	scaffold15992:20070-20580_0	13333.ERN19830	4.06e-53	175	KOG1192@1|root,KOG1192@2759|Eukaryota,37HZV@33090|Viridiplantae,3G9TD@35493|Streptophyta	35493|Streptophyta	CG	Belongs to the UDP-glycosyltransferase family	UGT85A1	GO:0003674,GO:0003824,GO:0005575,GO:0005622,GO:0005623,GO:0008194,GO:0015020,GO:0016740,GO:0016757,GO:0016758,GO:0035251,GO:0043226,GO:0043227,GO:0043229,GO:0043231,GO:0044424,GO:0044464,GO:0046527,GO:0050403,GO:0050502,GO:0080043,GO:0080044	2.4.1.324	ko:K21374	-	-	-	-	ko00000,ko01000,ko01003	-	GT1	-	UDPGT	2
323	scaffold15992:20989-21666_0	3659.XP_004172439.1	8.43e-79	246	KOG1192@1|root,KOG1192@2759|Eukaryota,37HZV@33090|Viridiplantae,3G9TD@35493|Streptophyta,4JK1Y@91835|fabids	35493|Streptophyta	CG	Belongs to the UDP-glycosyltransferase family	-	GO:0003674,GO:0003824,GO:0005575,GO:0005622,GO:0005623,GO:0008194,GO:0015020,GO:0016740,GO:0016757,GO:0016758,GO:0035251,GO:0043226,GO:0043227,GO:0043229,GO:0043231,GO:0044424,GO:0044464,GO:0046527,GO:0080043,GO:0080044	2.4.1.324	ko:K21374	-	-	-	-	ko00000,ko01000,ko01003	-	GT1	-	UDPGT	2
324	scaffold160364:20760-21050_0	28532.XP_010545192.1	5.46e-56	179	COG1131@1|root,KOG0065@2759|Eukaryota,37P62@33090|Viridiplantae,3G8YT@35493|Streptophyta,3HN2Z@3699|Brassicales	35493|Streptophyta	Q	ABC transporter G family member	-	GO:0003674,GO:0003824,GO:0005215,GO:0005575,GO:0005623,GO:0005886,GO:0005911,GO:0006810,GO:0006855,GO:0008150,GO:0009506,GO:0015399,GO:0015405,GO:0015893,GO:0016020,GO:0016021,GO:0016462,GO:0016787,GO:0016817,GO:0016818,GO:0016887,GO:0017111,GO:0022804,GO:0022857,GO:0030054,GO:0031224,GO:0042221,GO:0042493,GO:0042623,GO:0042626,GO:0043492,GO:0044425,GO:0044464,GO:0050896,GO:0051179,GO:0051234,GO:…	-	-	-	-	-	-	-	-	-	-	ABC2_membrane,ABC_tran,ABC_trans_N,PDR_assoc	2
325	scaffold160364:21146-21478_0	42345.XP_008780553.1	1.47e-51	169	COG1131@1|root,KOG0065@2759|Eukaryota,37P62@33090|Viridiplantae,3GB0P@35493|Streptophyta	35493|Streptophyta	Q	Belongs to the ABC transporter superfamily. ABCG family. PDR (TC 3.A.1.205) subfamily	-	-	-	-	-	-	-	-	-	-	-	-	ABC_tran	2
326	scaffold160364:22462-22565_0	4513.MLOC_22875.1	1.87e-12	61.6	COG1131@1|root,KOG0065@2759|Eukaryota	2759|Eukaryota	V	ATPase activity	-	-	-	-	-	-	-	-	-	-	-	-	ABC2_membrane,ABC_tran,ABC_trans_N,PDR_assoc	2
327	scaffold160364:22679-22839_0	29760.VIT_09s0002g05450.t01	1.12e-10	61.2	COG1131@1|root,KOG0065@2759|Eukaryota,37P62@33090|Viridiplantae,3GB0P@35493|Streptophyta	35493|Streptophyta	Q	Belongs to the ABC transporter superfamily. ABCG family. PDR (TC 3.A.1.205) subfamily	-	-	-	-	-	-	-	-	-	-	-	-	ABC2_membrane,ABC_tran,ABC_trans_N,PDR_assoc	2
328	scaffold160364:22948-23264_0	161934.XP_010677174.1	5.05e-46	155	COG1131@1|root,KOG0065@2759|Eukaryota,37P62@33090|Viridiplantae,3G8YT@35493|Streptophyta	35493|Streptophyta	Q	Belongs to the ABC transporter superfamily. ABCG family. PDR (TC 3.A.1.205) subfamily	-	GO:0003674,GO:0003824,GO:0005215,GO:0005575,GO:0005623,GO:0005886,GO:0005911,GO:0006810,GO:0006855,GO:0008150,GO:0009506,GO:0015399,GO:0015405,GO:0015893,GO:0016020,GO:0016021,GO:0016462,GO:0016787,GO:0016817,GO:0016818,GO:0016887,GO:0017111,GO:0022804,GO:0022857,GO:0030054,GO:0031224,GO:0042221,GO:0042493,GO:0042623,GO:0042626,GO:0043492,GO:0044425,GO:0044464,GO:0050896,GO:0051179,GO:0051234,GO:…	-	-	-	-	-	-	-	-	-	-	ABC2_membrane,ABC_tran,ABC_trans_N,PDR_assoc	2
329	scaffold161583:100898-101063_0	77586.LPERR04G01230.1	3.75e-23	93.2	COG5253@1|root,KOG0229@2759|Eukaryota,37IC8@33090|Viridiplantae,3GA6J@35493|Streptophyta,3KUPF@4447|Liliopsida,3I3FS@38820|Poales	35493|Streptophyta	T	phosphatidylinositol 4-phosphate 5-kinase	-	GO:0003674,GO:0003779,GO:0003785,GO:0003824,GO:0005488,GO:0005515,GO:0005575,GO:0005623,GO:0005886,GO:0006629,GO:0006644,GO:0006650,GO:0006793,GO:0006796,GO:0008092,GO:0008150,GO:0008152,GO:0009987,GO:0016020,GO:0016301,GO:0016307,GO:0016308,GO:0016310,GO:0016740,GO:0016772,GO:0016773,GO:0019637,GO:0030258,GO:0044237,GO:0044238,GO:0044255,GO:0044464,GO:0044877,GO:0046486,GO:0046488,GO:0046834,GO:…	2.7.1.68	ko:K00889	ko00562,ko01100,ko04011,ko04070,ko04072,ko04139,ko04144,ko04666,ko04810,ko05231,map00562,map01100,map04011,map04070,map04072,map04139,map04144,map04666,map04810,map05231	M00130	R03469	RC00002,RC00078	ko00000,ko00001,ko00002,ko01000,ko04131	-	-	-	MORN,PIP5K	2
330	scaffold161583:101964-102131_0	3649.evm.TU.contig_45399.1	7.42e-24	92.8	COG5253@1|root,KOG0229@2759|Eukaryota,37IC8@33090|Viridiplantae,3G9JS@35493|Streptophyta,3HVKE@3699|Brassicales	35493|Streptophyta	T	phosphatidylinositol 4-phosphate 5-kinase	-	GO:0005575,GO:0005622,GO:0005623,GO:0005634,GO:0005737,GO:0005829,GO:0005975,GO:0006082,GO:0006520,GO:0006807,GO:0008150,GO:0008152,GO:0009987,GO:0016020,GO:0019752,GO:0043226,GO:0043227,GO:0043229,GO:0043231,GO:0043436,GO:0044237,GO:0044238,GO:0044281,GO:0044424,GO:0044444,GO:0044464,GO:0071704,GO:1901564	2.7.1.68	ko:K00889	ko00562,ko01100,ko04011,ko04070,ko04072,ko04139,ko04144,ko04666,ko04810,ko05231,map00562,map01100,map04011,map04070,map04072,map04139,map04144,map04666,map04810,map05231	M00130	R03469	RC00002,RC00078	ko00000,ko00001,ko00002,ko01000,ko04131	-	-	-	MORN,PIP5K	2
331	scaffold161583:99170-99357_0	4565.Traes_2DL_F287DF891.1	3.16e-25	100	COG5253@1|root,KOG0229@2759|Eukaryota,37IC8@33090|Viridiplantae,3G9JS@35493|Streptophyta,3KRHU@4447|Liliopsida	35493|Streptophyta	T	Phosphatidylinositol-4-phosphate 5-kinase 9	-	-	2.7.1.68	ko:K00889	ko00562,ko01100,ko04011,ko04070,ko04072,ko04139,ko04144,ko04666,ko04810,ko05231,map00562,map01100,map04011,map04070,map04072,map04139,map04144,map04666,map04810,map05231	M00130	R03469	RC00002,RC00078	ko00000,ko00001,ko00002,ko01000,ko04131	-	-	-	MORN,PIP5K	2
332	scaffold161810:63003-63365_0	4081.Solyc04g078650.2.1	7.78e-36	129	28MZX@1|root,2R34Q@2759|Eukaryota,37HRY@33090|Viridiplantae,3GEDR@35493|Streptophyta,44JHJ@71274|asterids	35493|Streptophyta	K	Homeodomain	WOX4	GO:0000003,GO:0003006,GO:0005575,GO:0005622,GO:0005623,GO:0005634,GO:0007154,GO:0007165,GO:0007275,GO:0008150,GO:0009790,GO:0009791,GO:0009793,GO:0009888,GO:0009987,GO:0010065,GO:0010067,GO:0010087,GO:0010154,GO:0022414,GO:0023052,GO:0032501,GO:0032502,GO:0043226,GO:0043227,GO:0043229,GO:0043231,GO:0044424,GO:0044464,GO:0048316,GO:0048507,GO:0048508,GO:0048608,GO:0048731,GO:0048856,GO:0050789,GO:…	-	-	-	-	-	-	-	-	-	-	Homeobox	2
333	scaffold162933:37292-38134_0	88036.EFJ18881	4.24e-82	254	KOG3071@1|root,KOG3071@2759|Eukaryota,37Q0R@33090|Viridiplantae,3GJ0Q@35493|Streptophyta	35493|Streptophyta	I	GNS1 SUR4 membrane family protein	-	-	2.3.1.199	ko:K10249	ko00062,ko01110,map00062,map01110	M00415	R09419,R10825	RC00004,RC02888,RC02997	ko00000,ko00001,ko00002,ko01000,ko01004	-	-	-	ELO	2
334	scaffold164299:47090-48387_0	13333.ERN17667	2.73e-168	496	COG0515@1|root,KOG1187@2759|Eukaryota,37HHN@33090|Viridiplantae,3GFM6@35493|Streptophyta	35493|Streptophyta	T	wall-associated receptor kinase-like	-	GO:0003674,GO:0003824,GO:0004672,GO:0004674,GO:0005575,GO:0005623,GO:0005886,GO:0006464,GO:0006468,GO:0006793,GO:0006796,GO:0006807,GO:0007154,GO:0007165,GO:0007166,GO:0008150,GO:0008152,GO:0009987,GO:0016020,GO:0016301,GO:0016310,GO:0016740,GO:0016772,GO:0016773,GO:0019538,GO:0023052,GO:0036211,GO:0043170,GO:0043412,GO:0044237,GO:0044238,GO:0044260,GO:0044267,GO:0044464,GO:0050789,GO:0050794,GO:…	2.7.11.1	ko:K04733	ko04010,ko04064,ko04620,ko04621,ko04624,ko04722,ko05133,ko05140,ko05142,ko05145,ko05152,ko05162,ko05164,map04010,map04064,map04620,map04621,map04624,map04722,map05133,map05140,map05142,map05145,map05152,map05162,map05164	M00686	-	-	ko00000,ko00001,ko00002,ko01000,ko01001	-	-	-	GUB_WAK_bind,Pkinase,Pkinase_Tyr	2
335	scaffold16430:106808-107320_0	88036.EFJ05423	9.3e-48	162	KOG1100@1|root,KOG1100@2759|Eukaryota,37PMI@33090|Viridiplantae,3G7K2@35493|Streptophyta	35493|Streptophyta	O	E3 ubiquitin-protein ligase	-	GO:0001817,GO:0001959,GO:0002682,GO:0002697,GO:0002831,GO:0003674,GO:0003824,GO:0004842,GO:0004857,GO:0004866,GO:0004869,GO:0005575,GO:0005622,GO:0005623,GO:0005634,GO:0005654,GO:0005737,GO:0005829,GO:0006464,GO:0006508,GO:0006807,GO:0006915,GO:0007154,GO:0007165,GO:0007166,GO:0007249,GO:0008150,GO:0008152,GO:0008219,GO:0009892,GO:0009893,GO:0009966,GO:0009967,GO:0009987,GO:0010033,GO:0010466,GO:…	2.3.2.27	ko:K19042	-	-	-	-	ko00000,ko01000,ko04121	-	-	-	zf-C3HC4_3	2
336	scaffold165466:102048-103529_0	981085.XP_010110067.1	1.38e-23	111	2CNDX@1|root,2QVIB@2759|Eukaryota,37I07@33090|Viridiplantae,3G9DQ@35493|Streptophyta,4JG42@91835|fabids	35493|Streptophyta	S	Zein-binding	-	-	-	-	-	-	-	-	-	-	-	-	Zein-binding	2
337	scaffold165466:103795-104570_0	3988.XP_002518100.1	7.23e-13	73.6	2CNDX@1|root,2QVIB@2759|Eukaryota,37I07@33090|Viridiplantae,3G9DQ@35493|Streptophyta,4JI0P@91835|fabids	35493|Streptophyta	S	Zein-binding	-	-	-	-	-	-	-	-	-	-	-	-	Zein-binding	2
338	scaffold166812:62935-64796_0	218851.Aquca_055_00133.1	9.44e-198	573	KOG4197@1|root,KOG4197@2759|Eukaryota,37HY9@33090|Viridiplantae,3GBJA@35493|Streptophyta	35493|Streptophyta	S	Pentatricopeptide repeat-containing protein	-	GO:0003674,GO:0003676,GO:0003723,GO:0003824,GO:0004518,GO:0004519,GO:0005488,GO:0005575,GO:0005622,GO:0005623,GO:0006139,GO:0006725,GO:0006807,GO:0008150,GO:0008152,GO:0009451,GO:0009987,GO:0016070,GO:0016787,GO:0016788,GO:0034641,GO:0043170,GO:0043226,GO:0043227,GO:0043229,GO:0043231,GO:0043412,GO:0044237,GO:0044238,GO:0044424,GO:0044464,GO:0046483,GO:0071704,GO:0090304,GO:0090305,GO:0097159,GO:…	-	-	-	-	-	-	-	-	-	-	DYW_deaminase,PPR,PPR_2	2
339	scaffold167029:64957-65133_0	4565.Traes_3AL_72DA6C7BE.1	1.37e-12	66.6	COG1199@1|root,KOG1132@2759|Eukaryota,37HFH@33090|Viridiplantae,3GEVA@35493|Streptophyta,3KYG8@4447|Liliopsida	35493|Streptophyta	L	Regulator of telomere elongation helicase 1	RTEL1	GO:0000018,GO:0000723,GO:0000725,GO:0005575,GO:0005622,GO:0005623,GO:0005737,GO:0005739,GO:0006139,GO:0006259,GO:0006260,GO:0006261,GO:0006281,GO:0006282,GO:0006298,GO:0006310,GO:0006725,GO:0006807,GO:0006950,GO:0006974,GO:0006996,GO:0007275,GO:0008150,GO:0008152,GO:0009058,GO:0009059,GO:0009555,GO:0009892,GO:0009987,GO:0010569,GO:0010605,GO:0016043,GO:0019219,GO:0019222,GO:0022622,GO:0031323,GO:…	3.6.4.12	ko:K11136	-	-	-	-	ko00000,ko01000,ko03032	-	-	-	DEAD_2,Helicase_C_2	2
340	scaffold167029:65424-65586_0	4565.Traes_3AL_72DA6C7BE.1	6.14e-12	64.7	COG1199@1|root,KOG1132@2759|Eukaryota,37HFH@33090|Viridiplantae,3GEVA@35493|Streptophyta,3KYG8@4447|Liliopsida	35493|Streptophyta	L	Regulator of telomere elongation helicase 1	RTEL1	GO:0000018,GO:0000723,GO:0000725,GO:0005575,GO:0005622,GO:0005623,GO:0005737,GO:0005739,GO:0006139,GO:0006259,GO:0006260,GO:0006261,GO:0006281,GO:0006282,GO:0006298,GO:0006310,GO:0006725,GO:0006807,GO:0006950,GO:0006974,GO:0006996,GO:0007275,GO:0008150,GO:0008152,GO:0009058,GO:0009059,GO:0009555,GO:0009892,GO:0009987,GO:0010569,GO:0010605,GO:0016043,GO:0019219,GO:0019222,GO:0022622,GO:0031323,GO:…	3.6.4.12	ko:K11136	-	-	-	-	ko00000,ko01000,ko03032	-	-	-	DEAD_2,Helicase_C_2	2
341	scaffold167029:65760-65910_0	4565.Traes_3AL_72DA6C7BE.1	4.18e-21	88.6	COG1199@1|root,KOG1132@2759|Eukaryota,37HFH@33090|Viridiplantae,3GEVA@35493|Streptophyta,3KYG8@4447|Liliopsida	35493|Streptophyta	L	Regulator of telomere elongation helicase 1	RTEL1	GO:0000018,GO:0000723,GO:0000725,GO:0005575,GO:0005622,GO:0005623,GO:0005737,GO:0005739,GO:0006139,GO:0006259,GO:0006260,GO:0006261,GO:0006281,GO:0006282,GO:0006298,GO:0006310,GO:0006725,GO:0006807,GO:0006950,GO:0006974,GO:0006996,GO:0007275,GO:0008150,GO:0008152,GO:0009058,GO:0009059,GO:0009555,GO:0009892,GO:0009987,GO:0010569,GO:0010605,GO:0016043,GO:0019219,GO:0019222,GO:0022622,GO:0031323,GO:…	3.6.4.12	ko:K11136	-	-	-	-	ko00000,ko01000,ko03032	-	-	-	DEAD_2,Helicase_C_2	2
342	scaffold168455:174472-175938_0	218851.Aquca_002_00320.1	2.65e-72	242	KOG4155@1|root,KOG4155@2759|Eukaryota,37KM0@33090|Viridiplantae,3GF9F@35493|Streptophyta	35493|Streptophyta	S	Vegetative incompatibility protein	-	-	-	ko:K14963	ko04934,map04934	-	-	-	ko00000,ko00001,ko03036	-	-	-	WD40	2
343	scaffold168455:174595-175938_0	218851.Aquca_002_00320.1	3.29e-72	240	KOG4155@1|root,KOG4155@2759|Eukaryota,37KM0@33090|Viridiplantae,3GF9F@35493|Streptophyta	35493|Streptophyta	S	Vegetative incompatibility protein	-	-	-	ko:K14963	ko04934,map04934	-	-	-	ko00000,ko00001,ko03036	-	-	-	WD40	2
344	scaffold169722:100334-100966_0	4572.TRIUR3_19378-P1	1.67e-85	262	COG2124@1|root,KOG0156@2759|Eukaryota,37QSJ@33090|Viridiplantae,3G8WW@35493|Streptophyta,3M4U2@4447|Liliopsida,3I836@38820|Poales	35493|Streptophyta	Q	Belongs to the cytochrome P450 family	-	-	-	ko:K20556	-	-	-	-	ko00000,ko00199	-	-	-	p450	2
345	scaffold169722:99026-99967_0	13333.ERN14975	1.02e-64	218	COG2124@1|root,KOG0156@2759|Eukaryota,37QSJ@33090|Viridiplantae,3G8WW@35493|Streptophyta	35493|Streptophyta	Q	Belongs to the cytochrome P450 family	-	-	-	ko:K20556	-	-	-	-	ko00000,ko00199	-	-	-	p450	2
346	scaffold169876:71444-72117_0	4530.OS07T0566800-01	2.61e-10	65.5	2CXI7@1|root,2RXQV@2759|Eukaryota,37TRI@33090|Viridiplantae,3GI0T@35493|Streptophyta,3M09M@4447|Liliopsida,3IGKS@38820|Poales	35493|Streptophyta	S	TIR domain	-	-	-	-	-	-	-	-	-	-	-	-	TIR,TIR_2	2
347	scaffold169932:124414-126294_0	3988.XP_002524705.1	3.6e-59	211	28P7J@1|root,2QVUK@2759|Eukaryota,37IS5@33090|Viridiplantae,3G72Z@35493|Streptophyta,4JKSE@91835|fabids	35493|Streptophyta	S	PB1 domain	-	-	-	-	-	-	-	-	-	-	-	-	PB1	2
348	scaffold169932:124428-126306_0	3988.XP_002524705.1	4.92e-59	211	28P7J@1|root,2QVUK@2759|Eukaryota,37IS5@33090|Viridiplantae,3G72Z@35493|Streptophyta,4JKSE@91835|fabids	35493|Streptophyta	S	PB1 domain	-	-	-	-	-	-	-	-	-	-	-	-	PB1	2
349	scaffold170552:232628-233084_0	3880.AES66806	1.59e-42	145	KOG0255@1|root,KOG0255@2759|Eukaryota,37QAZ@33090|Viridiplantae,3G9AQ@35493|Streptophyta,4JKBV@91835|fabids	35493|Streptophyta	S	Organic cation carnitine transporter	-	GO:0000325,GO:0001101,GO:0003674,GO:0005215,GO:0005575,GO:0005622,GO:0005623,GO:0005737,GO:0005773,GO:0005774,GO:0006810,GO:0006811,GO:0006820,GO:0006950,GO:0007154,GO:0008150,GO:0008509,GO:0008514,GO:0009414,GO:0009415,GO:0009507,GO:0009534,GO:0009535,GO:0009536,GO:0009579,GO:0009605,GO:0009628,GO:0009705,GO:0009987,GO:0009991,GO:0010035,GO:0015075,GO:0015711,GO:0016020,GO:0016021,GO:0022857,GO:…	-	ko:K08202	ko05231,map05231	-	-	-	ko00000,ko00001,ko02000	2.A.1.19.2,2.A.1.19.3	-	-	Sugar_tr	2
350	scaffold170552:233302-234521_0	13333.ERN12733	2.62e-145	430	KOG0255@1|root,KOG0255@2759|Eukaryota,37QAZ@33090|Viridiplantae,3G9AQ@35493|Streptophyta	35493|Streptophyta	S	Organic cation carnitine transporter	-	GO:0000325,GO:0001101,GO:0003674,GO:0005215,GO:0005575,GO:0005622,GO:0005623,GO:0005737,GO:0005773,GO:0005774,GO:0006810,GO:0006811,GO:0006820,GO:0006950,GO:0007154,GO:0008150,GO:0008509,GO:0008514,GO:0009414,GO:0009415,GO:0009507,GO:0009534,GO:0009535,GO:0009536,GO:0009579,GO:0009605,GO:0009628,GO:0009705,GO:0009987,GO:0009991,GO:0010035,GO:0015075,GO:0015711,GO:0016020,GO:0016021,GO:0022857,GO:…	-	ko:K08202	ko05231,map05231	-	-	-	ko00000,ko00001,ko02000	2.A.1.19.2,2.A.1.19.3	-	-	Sugar_tr	2
351	scaffold17061:105907-106290_0	42345.XP_008777534.1	5.15e-21	91.7	KOG0406@1|root,KOG0406@2759|Eukaryota,37YB9@33090|Viridiplantae,3GNZ7@35493|Streptophyta,3M391@4447|Liliopsida	35493|Streptophyta	O	Glutathione S-transferase, C-terminal domain	-	-	2.5.1.18	ko:K00799	ko00480,ko00980,ko00982,ko00983,ko01524,ko05200,ko05204,ko05225,ko05418,map00480,map00980,map00982,map00983,map01524,map05200,map05204,map05225,map05418	-	R03522,R07002,R07003,R07004,R07023,R07024,R07025,R07026,R07069,R07070,R07083,R07084,R07091,R07092,R07093,R07094,R07100,R07113,R07116,R08280,R09409,R11905	RC00004,RC00069,RC00840,RC00948,RC01704,RC01705,RC01706,RC01758,RC01759,RC01765,RC01767,RC01769,RC02243,RC02527,RC02939,RC02940,RC02942,RC02943,RC02944	ko00000,ko00001,ko01000,ko02000	1.A.12.2.2,1.A.12.3.2	-	-	GST_C,GST_C_2,GST_N	2
352	scaffold17061:106368-106685_0	4537.OPUNC10G15010.1	6.84e-47	157	KOG0406@1|root,KOG0406@2759|Eukaryota,37P8V@33090|Viridiplantae,3GBW7@35493|Streptophyta,3KZCS@4447|Liliopsida,3I5FW@38820|Poales	35493|Streptophyta	O	Glutathione S-transferase, N-terminal domain	-	-	2.5.1.18	ko:K00799	ko00480,ko00980,ko00982,ko00983,ko01524,ko05200,ko05204,ko05225,ko05418,map00480,map00980,map00982,map00983,map01524,map05200,map05204,map05225,map05418	-	R03522,R07002,R07003,R07004,R07023,R07024,R07025,R07026,R07069,R07070,R07083,R07084,R07091,R07092,R07093,R07094,R07100,R07113,R07116,R08280,R09409,R11905	RC00004,RC00069,RC00840,RC00948,RC01704,RC01705,RC01706,RC01758,RC01759,RC01765,RC01767,RC01769,RC02243,RC02527,RC02939,RC02940,RC02942,RC02943,RC02944	ko00000,ko00001,ko01000,ko02000	1.A.12.2.2,1.A.12.3.2	-	-	GST_C,GST_C_2,GST_N,GST_N_3	2
353	scaffold171038:72004-72253_0	42345.XP_008810066.1	1.73e-23	98.6	COG3240@1|root,2QQP0@2759|Eukaryota,37KD4@33090|Viridiplantae,3GHJ0@35493|Streptophyta,3KWD2@4447|Liliopsida	35493|Streptophyta	I	Belongs to the GDSL lipolytic enzyme family	-	GO:0001101,GO:0006950,GO:0006970,GO:0006972,GO:0007275,GO:0008150,GO:0009628,GO:0009651,GO:0009719,GO:0009725,GO:0009751,GO:0010033,GO:0010035,GO:0010038,GO:0010226,GO:0014070,GO:0032501,GO:0032502,GO:0042221,GO:0042335,GO:0042493,GO:0042538,GO:0046677,GO:0048856,GO:0050896,GO:1901700	-	-	-	-	-	-	-	-	-	-	Lipase_GDSL	2
354	scaffold171038:72397-72548_0	4536.ONIVA02G26800.1	1.39e-10	60.1	COG3240@1|root,2QQP0@2759|Eukaryota,37KD4@33090|Viridiplantae,3GHJ0@35493|Streptophyta,3KWD2@4447|Liliopsida,3I6Z7@38820|Poales	35493|Streptophyta	I	Belongs to the GDSL lipolytic enzyme family	-	-	-	-	-	-	-	-	-	-	-	-	Lipase_GDSL	2
355	scaffold171038:73322-73561_0	3988.XP_002522021.1	2.2e-22	95.5	COG3240@1|root,2QQP0@2759|Eukaryota,37KD4@33090|Viridiplantae,3GHJ0@35493|Streptophyta,4JIFE@91835|fabids	35493|Streptophyta	I	Belongs to the GDSL lipolytic enzyme family	-	-	-	-	-	-	-	-	-	-	-	-	Lipase_GDSL	2
356	scaffold171038:73865-74114_0	13333.ERN15810	1.16e-17	82.8	COG3240@1|root,2QQP0@2759|Eukaryota,37KD4@33090|Viridiplantae,3GHJ0@35493|Streptophyta	35493|Streptophyta	I	Belongs to the GDSL lipolytic enzyme family	-	GO:0001101,GO:0006950,GO:0006970,GO:0006972,GO:0007275,GO:0008150,GO:0009628,GO:0009651,GO:0009719,GO:0009725,GO:0009751,GO:0010033,GO:0010035,GO:0010038,GO:0010226,GO:0014070,GO:0032501,GO:0032502,GO:0042221,GO:0042335,GO:0042493,GO:0042538,GO:0046677,GO:0048856,GO:0050896,GO:1901700	-	-	-	-	-	-	-	-	-	-	Lipase_GDSL	2
357	scaffold171038:74521-74747_0	3885.XP_007147236.1	7.47e-26	97.4	COG3240@1|root,2QQP0@2759|Eukaryota,37KD4@33090|Viridiplantae,3GHJ0@35493|Streptophyta	35493|Streptophyta	I	Belongs to the GDSL lipolytic enzyme family	-	-	-	-	-	-	-	-	-	-	-	-	Lipase_GDSL	2
358	scaffold172189:12016-12119_0	90675.XP_010423542.1	4.14e-14	65.9	KOG2366@1|root,KOG2366@2759|Eukaryota	2759|Eukaryota	G	alpha-galactosidase	-	GO:0003674,GO:0003824,GO:0004553,GO:0004557,GO:0005575,GO:0005618,GO:0005622,GO:0005623,GO:0005737,GO:0005975,GO:0006629,GO:0006643,GO:0006664,GO:0006665,GO:0006672,GO:0006677,GO:0006687,GO:0006807,GO:0008150,GO:0008152,GO:0009056,GO:0009311,GO:0009505,GO:0009987,GO:0015925,GO:0016042,GO:0016137,GO:0016139,GO:0016787,GO:0016798,GO:0019377,GO:0030149,GO:0030312,GO:0034641,GO:0043603,GO:0044237,GO:…	3.2.1.22	ko:K07407	ko00052,ko00561,ko00600,ko00603,map00052,map00561,map00600,map00603	-	R01101,R01103,R01104,R01194,R01329,R02926,R03634,R04019,R04470,R05549,R05961,R06091	RC00049,RC00059,RC00451	ko00000,ko00001,ko01000	-	-	-	Melibiase_2,Melibiase_2_C	2
359	scaffold172189:13729-13869_0	4565.Traes_5BS_F08C1056A.1	3.19e-16	74.7	KOG2366@1|root,KOG2366@2759|Eukaryota,37MJ5@33090|Viridiplantae,3GCPI@35493|Streptophyta,3KX5K@4447|Liliopsida,3IDGW@38820|Poales	35493|Streptophyta	G	Alpha galactosidase A	-	GO:0005575,GO:0005618,GO:0005623,GO:0009505,GO:0030312,GO:0044464,GO:0071944	3.2.1.22	ko:K07407	ko00052,ko00561,ko00600,ko00603,map00052,map00561,map00600,map00603	-	R01101,R01103,R01104,R01194,R01329,R02926,R03634,R04019,R04470,R05549,R05961,R06091	RC00049,RC00059,RC00451	ko00000,ko00001,ko01000	-	-	-	Melibiase_2,Melibiase_2_C	2
360	scaffold172652:74653-75257_0	13333.ERN09266	5.15e-73	238	COG3104@1|root,KOG1237@2759|Eukaryota,37JQT@33090|Viridiplantae,3G8RH@35493|Streptophyta	35493|Streptophyta	E	Protein NRT1 PTR FAMILY	-	GO:0001101,GO:0003674,GO:0005215,GO:0005451,GO:0005575,GO:0005623,GO:0005886,GO:0006810,GO:0006811,GO:0006812,GO:0006813,GO:0006820,GO:0007275,GO:0007568,GO:0008150,GO:0008324,GO:0008509,GO:0009987,GO:0010035,GO:0010038,GO:0010150,GO:0010167,GO:0015075,GO:0015077,GO:0015078,GO:0015079,GO:0015103,GO:0015112,GO:0015291,GO:0015297,GO:0015298,GO:0015299,GO:0015318,GO:0015386,GO:0015491,GO:0015672,GO:…	-	ko:K14638	-	-	-	-	ko00000,ko02000	2.A.17.3	-	-	PTR2	2
361	scaffold172652:76524-77086_0	13333.ERN09266	5.03e-75	243	COG3104@1|root,KOG1237@2759|Eukaryota,37JQT@33090|Viridiplantae,3G8RH@35493|Streptophyta	35493|Streptophyta	E	Protein NRT1 PTR FAMILY	-	GO:0001101,GO:0003674,GO:0005215,GO:0005451,GO:0005575,GO:0005623,GO:0005886,GO:0006810,GO:0006811,GO:0006812,GO:0006813,GO:0006820,GO:0007275,GO:0007568,GO:0008150,GO:0008324,GO:0008509,GO:0009987,GO:0010035,GO:0010038,GO:0010150,GO:0010167,GO:0015075,GO:0015077,GO:0015078,GO:0015079,GO:0015103,GO:0015112,GO:0015291,GO:0015297,GO:0015298,GO:0015299,GO:0015318,GO:0015386,GO:0015491,GO:0015672,GO:…	-	ko:K14638	-	-	-	-	ko00000,ko02000	2.A.17.3	-	-	PTR2	2
362	scaffold172652:79154-79371_0	4565.Traes_6BL_B0B2240BD.1	6.07e-28	104	COG3104@1|root,KOG1237@2759|Eukaryota,37JQT@33090|Viridiplantae,3G8RH@35493|Streptophyta,3KQH6@4447|Liliopsida,3IGEI@38820|Poales	35493|Streptophyta	E	POT family	-	GO:0001101,GO:0003674,GO:0005215,GO:0005451,GO:0005575,GO:0005623,GO:0005886,GO:0006810,GO:0006811,GO:0006812,GO:0006813,GO:0006820,GO:0007275,GO:0007568,GO:0008150,GO:0008324,GO:0008509,GO:0009987,GO:0010035,GO:0010038,GO:0010150,GO:0010167,GO:0015075,GO:0015077,GO:0015078,GO:0015079,GO:0015103,GO:0015112,GO:0015291,GO:0015297,GO:0015298,GO:0015299,GO:0015318,GO:0015386,GO:0015491,GO:0015672,GO:…	-	ko:K14638	-	-	-	-	ko00000,ko02000	2.A.17.3	-	-	PTR2	2
363	scaffold17339:182824-183096_0	42345.XP_008790034.1	1.4e-11	65.9	COG5041@1|root,KOG3092@2759|Eukaryota,37N3F@33090|Viridiplantae,3G8JE@35493|Streptophyta,3KMM8@4447|Liliopsida	35493|Streptophyta	DKT	Plays a complex role in regulating the basal catalytic activity of the alpha subunit	-	-	-	ko:K03115	ko03008,ko04064,ko04137,ko04139,ko04310,ko04520,ko04712,ko05162,ko05168,ko05169,map03008,map04064,map04137,map04139,map04310,map04520,map04712,map05162,map05168,map05169	-	-	-	ko00000,ko00001,ko03009	-	-	-	CK_II_beta	2
364	scaffold17339:183661-183882_0	4155.Migut.B01502.1.p	7.42e-44	149	COG5041@1|root,KOG3092@2759|Eukaryota,37N3F@33090|Viridiplantae,3G8JE@35493|Streptophyta,44DJX@71274|asterids	35493|Streptophyta	DKT	Plays a complex role in regulating the basal catalytic activity of the alpha subunit	-	-	-	ko:K03115	ko03008,ko04064,ko04137,ko04139,ko04310,ko04520,ko04712,ko05162,ko05168,ko05169,map03008,map04064,map04137,map04139,map04310,map04520,map04712,map05162,map05168,map05169	-	-	-	ko00000,ko00001,ko03009	-	-	-	CK_II_beta	2
365	scaffold173748:7288-9212_0	4432.XP_010243611.1	2.03e-229	665	KOG4197@1|root,KOG4197@2759|Eukaryota,37N5Q@33090|Viridiplantae,3GH38@35493|Streptophyta	35493|Streptophyta	O	Pentatricopeptide repeat-containing protein	-	GO:0003674,GO:0003676,GO:0003723,GO:0003824,GO:0004518,GO:0004519,GO:0005488,GO:0005575,GO:0005622,GO:0005623,GO:0005737,GO:0006139,GO:0006725,GO:0006807,GO:0008150,GO:0008152,GO:0009451,GO:0009507,GO:0009536,GO:0009987,GO:0016070,GO:0016071,GO:0016556,GO:0016787,GO:0016788,GO:0034641,GO:0043170,GO:0043226,GO:0043227,GO:0043229,GO:0043231,GO:0043412,GO:0044237,GO:0044238,GO:0044424,GO:0044444,GO:…	-	-	-	-	-	-	-	-	-	-	DYW_deaminase,PPR,PPR_2	2
366	scaffold173890:51538-51746_0	13333.ERN15236	1.66e-11	62.4	COG0515@1|root,2QQCZ@2759|Eukaryota,37PZK@33090|Viridiplantae,3GA01@35493|Streptophyta	13333.ERN15236|-	T	receptor-like serine threonine-protein kinase	-	-	-	-	-	-	-	-	-	-	-	-	-	2
367	scaffold173890:51890-52016_0	4577.GRMZM2G459224_P01	1.75e-12	63.5	29RRD@1|root,2RXBX@2759|Eukaryota,37QXC@33090|Viridiplantae,3GG63@35493|Streptophyta,3KRWH@4447|Liliopsida,3I7NH@38820|Poales	35493|Streptophyta	T	Belongs to the protein kinase superfamily. Ser Thr protein kinase family	-	-	-	-	-	-	-	-	-	-	-	-	LRRNT_2,LRR_8,Pkinase,Pkinase_Tyr	2
368	scaffold175680:195988-196629_0	4572.TRIUR3_19378-P1	3.28e-81	251	COG2124@1|root,KOG0156@2759|Eukaryota,37QSJ@33090|Viridiplantae,3G8WW@35493|Streptophyta,3M4U2@4447|Liliopsida,3I836@38820|Poales	35493|Streptophyta	Q	Belongs to the cytochrome P450 family	-	-	-	ko:K20556	-	-	-	-	ko00000,ko00199	-	-	-	p450	2
369	scaffold175680:196731-197627_0	81985.XP_006292819.1	5.26e-58	201	COG2124@1|root,KOG0156@2759|Eukaryota,37QSJ@33090|Viridiplantae,3G8WW@35493|Streptophyta,3HXP0@3699|Brassicales	35493|Streptophyta	Q	cytochrome P450	-	-	1.14.14.1	ko:K07408,ko:K20556	ko00140,ko00380,ko00830,ko00980,ko01100,ko04913,ko05204,map00140,map00380,map00830,map00980,map01100,map04913,map05204	-	R02354,R02355,R03089,R03408,R03629,R07000,R07001,R07021,R07022,R07079,R07080,R07081,R07085,R07087,R07098,R07099,R08390,R08392,R09418,R09423,R09442	RC00046,RC00661,RC00704,RC00723,RC00724,RC01444,RC01445,RC01727,RC01732,RC01733,RC02531	ko00000,ko00001,ko00199,ko01000	-	-	-	p450	2
370	scaffold176374:67334-67544_0	225117.XP_009352344.1	2.47e-23	96.3	COG0515@1|root,2QUDG@2759|Eukaryota,37RYK@33090|Viridiplantae,3GA8K@35493|Streptophyta,4JRSW@91835|fabids	35493|Streptophyta	T	G-type lectin S-receptor-like serine threonine-protein kinase	-	GO:0003674,GO:0003824,GO:0004672,GO:0004674,GO:0005488,GO:0005515,GO:0005516,GO:0005575,GO:0005623,GO:0005886,GO:0006464,GO:0006468,GO:0006793,GO:0006796,GO:0006807,GO:0008150,GO:0008152,GO:0009987,GO:0016020,GO:0016301,GO:0016310,GO:0016740,GO:0016772,GO:0016773,GO:0019538,GO:0036211,GO:0043170,GO:0043412,GO:0044237,GO:0044238,GO:0044260,GO:0044267,GO:0044464,GO:0071704,GO:0071944,GO:0140096,GO:…	-	-	-	-	-	-	-	-	-	-	B_lectin,DUF3403,PAN_2,Pkinase_Tyr,S_locus_glycop	2
371	scaffold176374:67660-67894_0	4565.Traes_2BL_93405E4E7.1	3.36e-27	106	2CMFZ@1|root,2QQ8R@2759|Eukaryota,37RPR@33090|Viridiplantae,3GCVH@35493|Streptophyta,3KTGZ@4447|Liliopsida,3I9NM@38820|Poales	35493|Streptophyta	T	Protein kinase domain	-	GO:0003674,GO:0003824,GO:0004672,GO:0004674,GO:0005575,GO:0005623,GO:0005886,GO:0006464,GO:0006468,GO:0006793,GO:0006796,GO:0006807,GO:0008150,GO:0008152,GO:0009987,GO:0016020,GO:0016301,GO:0016310,GO:0016740,GO:0016772,GO:0016773,GO:0019538,GO:0036211,GO:0043170,GO:0043412,GO:0044237,GO:0044238,GO:0044260,GO:0044267,GO:0044464,GO:0071704,GO:0071944,GO:0140096,GO:1901564	2.7.11.1	ko:K04733	ko04010,ko04064,ko04620,ko04621,ko04624,ko04722,ko05133,ko05140,ko05142,ko05145,ko05152,ko05162,ko05164,map04010,map04064,map04620,map04621,map04624,map04722,map05133,map05140,map05142,map05145,map05152,map05162,map05164	M00686	-	-	ko00000,ko00001,ko00002,ko01000,ko01001	-	-	-	Pkinase,Pkinase_Tyr	2
372	scaffold176374:68051-68201_0	4565.Traes_5DL_FB05B4F03.1	1.79e-12	63.9	COG0515@1|root,KOG1187@2759|Eukaryota,37JFM@33090|Viridiplantae,3G7TI@35493|Streptophyta,3KP2N@4447|Liliopsida	35493|Streptophyta	T	Protein kinase domain	-	GO:0003674,GO:0003824,GO:0004672,GO:0004674,GO:0005575,GO:0005623,GO:0005886,GO:0006464,GO:0006468,GO:0006793,GO:0006796,GO:0006807,GO:0006950,GO:0006952,GO:0008150,GO:0008152,GO:0009605,GO:0009607,GO:0009617,GO:0009987,GO:0016020,GO:0016301,GO:0016310,GO:0016740,GO:0016772,GO:0016773,GO:0019538,GO:0036211,GO:0042742,GO:0043170,GO:0043207,GO:0043412,GO:0044237,GO:0044238,GO:0044260,GO:0044267,GO:…	2.7.11.1	ko:K04733	ko04010,ko04064,ko04620,ko04621,ko04624,ko04722,ko05133,ko05140,ko05142,ko05145,ko05152,ko05162,ko05164,map04010,map04064,map04620,map04621,map04624,map04722,map05133,map05140,map05142,map05145,map05152,map05162,map05164	M00686	-	-	ko00000,ko00001,ko00002,ko01000,ko01001	-	-	-	Pkinase,Pkinase_Tyr	2
373	scaffold176374:68294-68659_0	4538.ORGLA08G0051500.1	4.48e-09	60.5	COG0515@1|root,2QUW9@2759|Eukaryota,37KJP@33090|Viridiplantae,3G96G@35493|Streptophyta	35493|Streptophyta	T	LRR receptor-like serine threonine-protein kinase	-	-	-	-	-	-	-	-	-	-	-	-	LRR_8,Malectin,Pkinase,Pkinase_Tyr	2
374	scaffold176628:103395-103517_0	4641.GSMUA_Achr2P21450_001	2.55e-13	65.9	COG0236@1|root,KOG1748@2759|Eukaryota,37VCX@33090|Viridiplantae,3GJFK@35493|Streptophyta,3M0C2@4447|Liliopsida	35493|Streptophyta	I	Carrier of the growing fatty acid chain in fatty acid biosynthesis	-	GO:0000035,GO:0000036,GO:0002376,GO:0003674,GO:0005488,GO:0005575,GO:0005622,GO:0005623,GO:0005737,GO:0005829,GO:0005975,GO:0006082,GO:0006629,GO:0006631,GO:0006633,GO:0006643,GO:0006644,GO:0006664,GO:0006793,GO:0006796,GO:0006950,GO:0006952,GO:0006955,GO:0007275,GO:0008150,GO:0008152,GO:0008610,GO:0008654,GO:0009058,GO:0009245,GO:0009247,GO:0009311,GO:0009312,GO:0009507,GO:0009536,GO:0009605,GO:…	-	-	-	-	-	-	-	-	-	-	PP-binding	2
375	scaffold17701:201664-202441_0	3827.XP_004503125.1	8.51e-17	85.5	28KX7@1|root,2QTDS@2759|Eukaryota,37RVD@33090|Viridiplantae,3GFFU@35493|Streptophyta,4JSMY@91835|fabids	35493|Streptophyta	S	Cysteine-rich repeat secretory protein	-	GO:0005575,GO:0005911,GO:0009506,GO:0030054,GO:0055044	-	-	-	-	-	-	-	-	-	-	Stress-antifung	2
376	scaffold17701:203939-204149_0	42345.XP_008782561.1	7.72e-24	98.6	COG0515@1|root,2RX9B@2759|Eukaryota,37SQB@33090|Viridiplantae,3GHG0@35493|Streptophyta,3KTI9@4447|Liliopsida	35493|Streptophyta	T	receptor-like protein kinase	-	-	2.7.11.1	ko:K04733	ko04010,ko04064,ko04620,ko04621,ko04624,ko04722,ko05133,ko05140,ko05142,ko05145,ko05152,ko05162,ko05164,map04010,map04064,map04620,map04621,map04624,map04722,map05133,map05140,map05142,map05145,map05152,map05162,map05164	M00686	-	-	ko00000,ko00001,ko00002,ko01000,ko01001	-	-	-	DUF3403,Pkinase,Pkinase_Tyr	2
377	scaffold17701:204260-204494_0	4565.Traes_6BS_A23A20DB8.1	1.46e-28	104	COG0515@1|root,2QUW9@2759|Eukaryota,37KJP@33090|Viridiplantae,3G96G@35493|Streptophyta,3KMVG@4447|Liliopsida,3I4UC@38820|Poales	35493|Streptophyta	T	Di-glucose binding within endoplasmic reticulum	-	-	-	-	-	-	-	-	-	-	-	-	LRR_8,Malectin,Pkinase,Pkinase_Tyr	2
378	scaffold17701:204632-204776_0	72664.XP_006396983.1	1.74e-13	65.9	COG0515@1|root,2QVTV@2759|Eukaryota,37HTV@33090|Viridiplantae,3GD1F@35493|Streptophyta,3HQM3@3699|Brassicales	35493|Streptophyta	T	Cysteine-rich receptor-like protein kinase	-	GO:0003674,GO:0003824,GO:0004672,GO:0004674,GO:0005575,GO:0005623,GO:0005886,GO:0006464,GO:0006468,GO:0006793,GO:0006796,GO:0006807,GO:0008150,GO:0008152,GO:0009987,GO:0016020,GO:0016301,GO:0016310,GO:0016740,GO:0016772,GO:0016773,GO:0019538,GO:0036211,GO:0043170,GO:0043412,GO:0044237,GO:0044238,GO:0044260,GO:0044267,GO:0044464,GO:0071704,GO:0071944,GO:0140096,GO:1901564	-	-	-	-	-	-	-	-	-	-	Pkinase,Pkinase_Tyr,Stress-antifung	2
379	scaffold177881:44930-45439_0	71139.XP_010026123.1	2.73e-39	138	2CY23@1|root,2S1EA@2759|Eukaryota,37V6Q@33090|Viridiplantae,3GJH9@35493|Streptophyta	35493|Streptophyta	S	Protein of unknown function, DUF538	-	-	-	-	-	-	-	-	-	-	-	-	DUF538	2
380	scaffold178023:17907-19655_0	13333.ERN11287	7.36e-230	669	KOG2021@1|root,KOG2021@2759|Eukaryota,37R9S@33090|Viridiplantae,3GBSP@35493|Streptophyta	35493|Streptophyta	JUY	exportin-T	-	GO:0000003,GO:0000049,GO:0003006,GO:0003674,GO:0003676,GO:0003723,GO:0005049,GO:0005488,GO:0005515,GO:0005575,GO:0005622,GO:0005623,GO:0005634,GO:0005635,GO:0005643,GO:0005737,GO:0005829,GO:0006403,GO:0006405,GO:0006409,GO:0006611,GO:0006810,GO:0006886,GO:0006913,GO:0007275,GO:0008104,GO:0008150,GO:0008536,GO:0009653,GO:0009791,GO:0009888,GO:0009908,GO:0009933,GO:0010014,GO:0012505,GO:0015031,GO:…	-	ko:K14288	ko03013,map03013	-	-	-	ko00000,ko00001,ko03016	-	-	-	Xpo1	2
381	scaffold178030:21650-21787_0	29760.VIT_13s0067g00010.t01	2.38e-20	84.3	KOG2847@1|root,KOG2847@2759|Eukaryota,37HK7@33090|Viridiplantae,3G9JK@35493|Streptophyta	35493|Streptophyta	I	phospholipid glycerol acyltransferase family protein	-	-	-	ko:K13511	ko00564,map00564	-	R09037	RC00004,RC00037	ko00000,ko00001,ko01000,ko01004	-	-	-	Acyltransferase	2
382	scaffold178820:19504-19866_0	85681.XP_006428826.1	8.75e-57	186	2C0PQ@1|root,2QU16@2759|Eukaryota,37S13@33090|Viridiplantae,3G770@35493|Streptophyta	35493|Streptophyta	Q	Removal of H(2)O(2), oxidation of toxic reductants, biosynthesis and degradation of lignin, suberization, auxin catabolism, response to environmental stresses such as wounding, pathogen attack and oxidative stress	-	GO:0003674,GO:0003824,GO:0004601,GO:0005575,GO:0005618,GO:0005622,GO:0005623,GO:0005737,GO:0005829,GO:0005911,GO:0006950,GO:0006952,GO:0008150,GO:0008152,GO:0009505,GO:0009506,GO:0009605,GO:0009607,GO:0009620,GO:0009636,GO:0009664,GO:0009987,GO:0016043,GO:0016209,GO:0016491,GO:0016684,GO:0030054,GO:0030312,GO:0042221,GO:0043207,GO:0044424,GO:0044444,GO:0044464,GO:0045229,GO:0050832,GO:0050896,GO:…	1.11.1.7	ko:K00430	ko00940,ko01100,ko01110,map00940,map01100,map01110	-	R00602,R02596,R03919,R04007,R07443	RC00034	ko00000,ko00001,ko01000	-	-	-	peroxidase	2
383	scaffold178820:20596-20799_0	3988.XP_002519557.1	3.82e-15	73.6	2C0PQ@1|root,2QU16@2759|Eukaryota,37S13@33090|Viridiplantae,3G770@35493|Streptophyta,4JI1U@91835|fabids	35493|Streptophyta	Q	Removal of H(2)O(2), oxidation of toxic reductants, biosynthesis and degradation of lignin, suberization, auxin catabolism, response to environmental stresses such as wounding, pathogen attack and oxidative stress	-	GO:0003674,GO:0003824,GO:0004601,GO:0005575,GO:0005618,GO:0005622,GO:0005623,GO:0005737,GO:0005829,GO:0005911,GO:0006950,GO:0006952,GO:0008150,GO:0008152,GO:0009505,GO:0009506,GO:0009605,GO:0009607,GO:0009620,GO:0009636,GO:0009664,GO:0009987,GO:0016043,GO:0016209,GO:0016491,GO:0016684,GO:0030054,GO:0030312,GO:0042221,GO:0043207,GO:0044424,GO:0044444,GO:0044464,GO:0045229,GO:0050832,GO:0050896,GO:…	1.11.1.7	ko:K00430	ko00940,ko01100,ko01110,map00940,map01100,map01110	-	R00602,R02596,R03919,R04007,R07443	RC00034	ko00000,ko00001,ko01000	-	-	-	peroxidase	2
384	scaffold178820:20614-20799_0	3988.XP_002519557.1	4.2e-15	73.2	2C0PQ@1|root,2QU16@2759|Eukaryota,37S13@33090|Viridiplantae,3G770@35493|Streptophyta,4JI1U@91835|fabids	35493|Streptophyta	Q	Removal of H(2)O(2), oxidation of toxic reductants, biosynthesis and degradation of lignin, suberization, auxin catabolism, response to environmental stresses such as wounding, pathogen attack and oxidative stress	-	GO:0003674,GO:0003824,GO:0004601,GO:0005575,GO:0005618,GO:0005622,GO:0005623,GO:0005737,GO:0005829,GO:0005911,GO:0006950,GO:0006952,GO:0008150,GO:0008152,GO:0009505,GO:0009506,GO:0009605,GO:0009607,GO:0009620,GO:0009636,GO:0009664,GO:0009987,GO:0016043,GO:0016209,GO:0016491,GO:0016684,GO:0030054,GO:0030312,GO:0042221,GO:0043207,GO:0044424,GO:0044444,GO:0044464,GO:0045229,GO:0050832,GO:0050896,GO:…	1.11.1.7	ko:K00430	ko00940,ko01100,ko01110,map00940,map01100,map01110	-	R00602,R02596,R03919,R04007,R07443	RC00034	ko00000,ko00001,ko01000	-	-	-	peroxidase	2
385	scaffold178820:24307-24528_0	3983.cassava4.1_031903m	8.01e-20	83.2	2C0PQ@1|root,2QU16@2759|Eukaryota,37S13@33090|Viridiplantae,3G770@35493|Streptophyta,4JI1U@91835|fabids	35493|Streptophyta	Q	Removal of H(2)O(2), oxidation of toxic reductants, biosynthesis and degradation of lignin, suberization, auxin catabolism, response to environmental stresses such as wounding, pathogen attack and oxidative stress	-	GO:0003674,GO:0003824,GO:0004601,GO:0005575,GO:0005618,GO:0005622,GO:0005623,GO:0005737,GO:0005829,GO:0005911,GO:0006950,GO:0006952,GO:0008150,GO:0008152,GO:0009505,GO:0009506,GO:0009605,GO:0009607,GO:0009620,GO:0009636,GO:0009664,GO:0009987,GO:0016043,GO:0016209,GO:0016491,GO:0016684,GO:0030054,GO:0030312,GO:0042221,GO:0043207,GO:0044424,GO:0044444,GO:0044464,GO:0045229,GO:0050832,GO:0050896,GO:…	1.11.1.7	ko:K00430	ko00940,ko01100,ko01110,map00940,map01100,map01110	-	R00602,R02596,R03919,R04007,R07443	RC00034	ko00000,ko00001,ko01000	-	-	-	peroxidase	2
386	scaffold178820:24595-24810_0	4565.Traes_2DS_9CFE43D77.1	1.35e-17	79.3	2C0PQ@1|root,2QU16@2759|Eukaryota,37S13@33090|Viridiplantae,3G770@35493|Streptophyta,3KWK9@4447|Liliopsida,3IEFZ@38820|Poales	35493|Streptophyta	Q	Belongs to the peroxidase family. Classical plant (class III) peroxidase subfamily	-	GO:0003674,GO:0003824,GO:0004601,GO:0005575,GO:0005618,GO:0005622,GO:0005623,GO:0005737,GO:0005829,GO:0005911,GO:0006950,GO:0006952,GO:0008150,GO:0008152,GO:0009505,GO:0009506,GO:0009605,GO:0009607,GO:0009620,GO:0009636,GO:0009664,GO:0009987,GO:0016043,GO:0016209,GO:0016491,GO:0016684,GO:0030054,GO:0030312,GO:0042221,GO:0043207,GO:0044424,GO:0044444,GO:0044464,GO:0045229,GO:0050832,GO:0050896,GO:…	1.11.1.7	ko:K00430	ko00940,ko01100,ko01110,map00940,map01100,map01110	-	R00602,R02596,R03919,R04007,R07443	RC00034	ko00000,ko00001,ko01000	-	-	-	peroxidase	2
387	scaffold179448:65079-65239_0	72658.Bostr.13129s0202.1.p	7.39e-12	63.9	KOG2864@1|root,KOG2864@2759|Eukaryota,37RCQ@33090|Viridiplantae,3G9BI@35493|Streptophyta	35493|Streptophyta	D	Protein RFT1 homolog	-	GO:0005575,GO:0005622,GO:0005623,GO:0005737,GO:0005783,GO:0005789,GO:0006810,GO:0006869,GO:0008150,GO:0009987,GO:0010876,GO:0012505,GO:0016020,GO:0016043,GO:0031984,GO:0033036,GO:0034203,GO:0034204,GO:0042175,GO:0043226,GO:0043227,GO:0043229,GO:0043231,GO:0044422,GO:0044424,GO:0044425,GO:0044432,GO:0044444,GO:0044446,GO:0044464,GO:0046836,GO:0051179,GO:0051234,GO:0061024,GO:0065007,GO:0065008,GO:…	-	ko:K06316	-	-	-	-	ko00000,ko02000	2.A.66.3	-	-	Rft-1	2
388	scaffold179537:64585-64718_0	42345.XP_008785015.1	6.37e-14	67.4	COG2226@1|root,KOG1540@2759|Eukaryota,37K8T@33090|Viridiplantae,3GENW@35493|Streptophyta,3KTVC@4447|Liliopsida	35493|Streptophyta	H	Involved in the biosynthesis of phylloquinone (vitamin K1). Methyltransferase required for the conversion of 2-phytyl- 1,4-beta-naphthoquinol to phylloquinol	MENG	GO:0003674,GO:0003824,GO:0005575,GO:0005622,GO:0005623,GO:0005737,GO:0006732,GO:0006766,GO:0008150,GO:0008152,GO:0008168,GO:0008169,GO:0008171,GO:0009058,GO:0009108,GO:0009110,GO:0009507,GO:0009536,GO:0009987,GO:0016740,GO:0016741,GO:0032259,GO:0042180,GO:0042181,GO:0042372,GO:0042374,GO:0043226,GO:0043227,GO:0043229,GO:0043231,GO:0044237,GO:0044249,GO:0044281,GO:0044283,GO:0044424,GO:0044444,GO:…	2.1.1.163,2.1.1.201	ko:K03183	ko00130,ko01100,ko01110,map00130,map01100,map01110	M00116,M00117	R04990,R04993,R06859,R08774,R09736	RC00003,RC01253,RC01662	ko00000,ko00001,ko00002,ko01000	-	-	-	Ubie_methyltran	2
389	scaffold180039:82061-82541_0	3712.Bo3g086770.1	6.71e-15	74.3	COG4886@1|root,2QPYS@2759|Eukaryota,37Q18@33090|Viridiplantae,3GA2W@35493|Streptophyta,3HWRD@3699|Brassicales	35493|Streptophyta	T	Belongs to the protein kinase superfamily. Ser Thr protein kinase family	-	-	2.7.11.1	ko:K04730,ko:K13428	ko04010,ko04064,ko04620,ko04624,ko04626,ko04722,ko05133,ko05140,ko05142,ko05145,ko05152,ko05162,ko05169,map04010,map04064,map04620,map04624,map04626,map04722,map05133,map05140,map05142,map05145,map05152,map05162,map05169	M00686	-	-	ko00000,ko00001,ko00002,ko01000,ko01001	-	-	-	LRRNT_2,LRR_1,LRR_8,Pkinase,Pkinase_Tyr	2
390	scaffold182407:125613-127529_0	42345.XP_008778298.1	4.51e-77	263	KOG4197@1|root,KOG4197@2759|Eukaryota,37SE9@33090|Viridiplantae,3GFEN@35493|Streptophyta,3KSKP@4447|Liliopsida	35493|Streptophyta	S	Pentatricopeptide repeat domain	-	GO:0003674,GO:0003676,GO:0003723,GO:0003824,GO:0004518,GO:0004519,GO:0005488,GO:0005575,GO:0005622,GO:0005623,GO:0006139,GO:0006725,GO:0006807,GO:0008150,GO:0008152,GO:0009451,GO:0009987,GO:0016070,GO:0016787,GO:0016788,GO:0034641,GO:0043170,GO:0043226,GO:0043227,GO:0043229,GO:0043231,GO:0043412,GO:0044237,GO:0044238,GO:0044424,GO:0044464,GO:0046483,GO:0071704,GO:0090304,GO:0090305,GO:0097159,GO:…	-	-	-	-	-	-	-	-	-	-	PPR,PPR_2,PPR_3	2
391	scaffold182531:61820-64288_0	4432.XP_010265649.1	6.13e-214	633	KOG4197@1|root,KOG4197@2759|Eukaryota,37NDI@33090|Viridiplantae,3G81M@35493|Streptophyta	35493|Streptophyta	S	Pentatricopeptide repeat-containing protein At1g79490	-	GO:0003674,GO:0003676,GO:0003723,GO:0003824,GO:0004518,GO:0004519,GO:0005488,GO:0005575,GO:0005622,GO:0005623,GO:0005737,GO:0005739,GO:0006139,GO:0006725,GO:0006807,GO:0008150,GO:0008152,GO:0009451,GO:0009987,GO:0016070,GO:0016787,GO:0016788,GO:0034641,GO:0043170,GO:0043226,GO:0043227,GO:0043229,GO:0043231,GO:0043412,GO:0044237,GO:0044238,GO:0044424,GO:0044444,GO:0044464,GO:0046483,GO:0071704,GO:…	-	-	-	-	-	-	-	-	-	-	PPR,PPR_2,PPR_3	2
392	scaffold184644:138695-138894_0	72664.XP_006390833.1	7.75e-20	84.7	COG1109@1|root,KOG1220@2759|Eukaryota,37JBZ@33090|Viridiplantae,3GFCT@35493|Streptophyta,3HSEQ@3699|Brassicales	35493|Streptophyta	G	Phosphoglucomutase/phosphomannomutase, alpha/beta/alpha domain II	-	GO:0003674,GO:0003824,GO:0004615,GO:0005975,GO:0008150,GO:0008152,GO:0016853,GO:0016866,GO:0016868,GO:0044238,GO:0071704	-	-	-	-	-	-	-	-	-	-	PGM_PMM_I,PGM_PMM_II,PGM_PMM_III	2
393	scaffold184644:139445-139961_0	4096.XP_009802461.1	1.31e-97	293	COG1109@1|root,KOG1220@2759|Eukaryota,37JBZ@33090|Viridiplantae,3GFCT@35493|Streptophyta,44E2P@71274|asterids	35493|Streptophyta	G	Phosphoglucomutase/phosphomannomutase, alpha/beta/alpha domain II	-	GO:0003674,GO:0003824,GO:0004615,GO:0005975,GO:0008150,GO:0008152,GO:0016853,GO:0016866,GO:0016868,GO:0044238,GO:0071704	-	-	-	-	-	-	-	-	-	-	PGM_PMM_I,PGM_PMM_II,PGM_PMM_III	2
394	scaffold185171:228143-228250_0	4577.AC191523.3_FGP001	4.56e-12	63.2	COG0420@1|root,KOG2310@2759|Eukaryota,37PQY@33090|Viridiplantae,3GF3H@35493|Streptophyta,3KPYG@4447|Liliopsida	35493|Streptophyta	L	Belongs to the MRE11 RAD32 family	-	GO:0000228,GO:0000785,GO:0000791,GO:0000793,GO:0000794,GO:0000795,GO:0005575,GO:0005622,GO:0005623,GO:0005634,GO:0005694,GO:0031974,GO:0031981,GO:0043226,GO:0043227,GO:0043228,GO:0043229,GO:0043231,GO:0043232,GO:0043233,GO:0044422,GO:0044424,GO:0044427,GO:0044428,GO:0044446,GO:0044454,GO:0044464,GO:0070013,GO:0099086	-	ko:K10865	ko03440,ko03450,ko04218,map03440,map03450,map04218	M00291,M00292,M00295	-	-	ko00000,ko00001,ko00002,ko03032,ko03400	-	-	-	Metallophos,Mre11_DNA_bind	2
395	scaffold185508:58470-58879_0	29760.VIT_11s0149g00070.t01	1.19e-43	147	COG0360@1|root,KOG4708@2759|Eukaryota,37UG6@33090|Viridiplantae,3GIRZ@35493|Streptophyta	35493|Streptophyta	J	RIBOSOMAL protein	-	-	-	ko:K02990	ko03010,map03010	M00178	-	-	br01610,ko00000,ko00001,ko00002,ko03011,ko03029	-	-	-	Ribosomal_S6	2
396	scaffold186120:32224-32458_0	71139.XP_010064848.1	2.81e-18	81.3	COG0318@1|root,KOG1176@2759|Eukaryota,37NTI@33090|Viridiplantae,3G7BK@35493|Streptophyta	35493|Streptophyta	I	butyrate--CoA ligase AAE11, peroxisomal-like	-	GO:0003674,GO:0003824,GO:0005575,GO:0005622,GO:0005623,GO:0005737,GO:0005777,GO:0006082,GO:0006629,GO:0006631,GO:0006790,GO:0006807,GO:0008150,GO:0008152,GO:0009058,GO:0009987,GO:0016143,GO:0016144,GO:0016405,GO:0016874,GO:0016877,GO:0016878,GO:0018858,GO:0019605,GO:0019748,GO:0019752,GO:0019757,GO:0019758,GO:0019760,GO:0019761,GO:0032787,GO:0042579,GO:0043226,GO:0043227,GO:0043229,GO:0043231,GO:…	-	-	-	-	-	-	-	-	-	-	AMP-binding,AMP-binding_C	2
397	scaffold186120:34290-35762_0	3750.XP_008339094.1	9.8e-233	657	COG0318@1|root,KOG1176@2759|Eukaryota,37NZS@33090|Viridiplantae,3G7PF@35493|Streptophyta,4JFSU@91835|fabids	35493|Streptophyta	I	acyl-activating enzyme 1	-	GO:0005575,GO:0005622,GO:0005623,GO:0005737,GO:0005777,GO:0042579,GO:0043226,GO:0043227,GO:0043229,GO:0043231,GO:0044424,GO:0044444,GO:0044464	-	ko:K00666	-	-	-	-	ko00000,ko01000,ko01004	-	-	-	AMP-binding,AMP-binding_C	2
398	scaffold186370:188984-191464_0	4432.XP_010242634.1	5.45e-226	669	KOG4197@1|root,KOG4197@2759|Eukaryota,37P1P@33090|Viridiplantae,3GEGY@35493|Streptophyta	35493|Streptophyta	J	Pentatricopeptide repeat-containing protein	-	GO:0003674,GO:0003676,GO:0003723,GO:0003824,GO:0004518,GO:0004519,GO:0005488,GO:0005575,GO:0005622,GO:0005623,GO:0006139,GO:0006725,GO:0006807,GO:0008150,GO:0008152,GO:0009451,GO:0009987,GO:0016070,GO:0016071,GO:0016556,GO:0016787,GO:0016788,GO:0034641,GO:0043170,GO:0043226,GO:0043227,GO:0043229,GO:0043231,GO:0043412,GO:0044237,GO:0044238,GO:0044424,GO:0044464,GO:0046483,GO:0071704,GO:0090304,GO:…	-	-	-	-	-	-	-	-	-	-	DYW_deaminase,PPR,PPR_2	2
399	scaffold186963:19558-20019_0	2711.XP_006490010.1	4.42e-16	82	COG2801@1|root,KOG0017@2759|Eukaryota,37Y8N@33090|Viridiplantae,3GXD3@35493|Streptophyta	33090|Viridiplantae	T	LRR receptor-like serine threonine-protein kinase	-	-	-	-	-	-	-	-	-	-	-	-	LRR_1,LRR_8,Pkinase,RVT_2	2
400	scaffold187397:136614-139007_0	4432.XP_010270723.1	1.09e-196	588	KOG4197@1|root,KOG4197@2759|Eukaryota,37J9V@33090|Viridiplantae,3GEKJ@35493|Streptophyta	35493|Streptophyta	L	Pentatricopeptide repeat-containing protein	-	GO:0003674,GO:0003676,GO:0003723,GO:0003824,GO:0004518,GO:0004519,GO:0005488,GO:0005575,GO:0005622,GO:0005623,GO:0006139,GO:0006725,GO:0006807,GO:0008150,GO:0008152,GO:0009451,GO:0009987,GO:0016070,GO:0016787,GO:0016788,GO:0034641,GO:0043170,GO:0043226,GO:0043227,GO:0043229,GO:0043231,GO:0043412,GO:0044237,GO:0044238,GO:0044424,GO:0044464,GO:0046483,GO:0071704,GO:0090304,GO:0090305,GO:0097159,GO:…	-	-	-	-	-	-	-	-	-	-	DYW_deaminase,PPR,PPR_2	2
401	scaffold187577:143409-144071_0	218851.Aquca_005_00101.1	8.67e-99	300	KOG1021@1|root,KOG1021@2759|Eukaryota,37J1S@33090|Viridiplantae,3G8K6@35493|Streptophyta	35493|Streptophyta	GMW	Glycosyltransferase	-	-	-	-	-	-	-	-	-	-	-	-	Exostosin	2
402	scaffold18794:276825-278165_0	13333.ERN07378	1.35e-115	352	28MBI@1|root,2QTUY@2759|Eukaryota,37HN4@33090|Viridiplantae,3GFTB@35493|Streptophyta	35493|Streptophyta	S	expressed protein	-	-	-	-	-	-	-	-	-	-	-	-	SAGA-Tad1	2
403	scaffold189399:17261-17887_0	4155.Migut.O00721.1.p	4.72e-83	257	COG2124@1|root,KOG0156@2759|Eukaryota,37N9R@33090|Viridiplantae,3G85P@35493|Streptophyta,44GBQ@71274|asterids	35493|Streptophyta	Q	Belongs to the cytochrome P450 family	F3HGO:0003674,GO:0003824,GO:0004497,GO:0005575,GO:0008150,GO:0008152,GO:0009058,GO:0009719,GO:0009725,GO:0009733,GO:0010033,GO:0016020,GO:0016491,GO:0016705,GO:0016709,GO:0019748,GO:0042221,GO:0044550,GO:0050896,GO:00551141.14.13.21ko:K05280ko00941,ko00944,ko01100,ko01110,map00941,map00944,map01100,map01110-R02442,R03124,R06537,R06538,R08002,R08032RC00046ko00000,ko00001,ko00199,ko01000---p450 sca…	GO:0003674,GO:0003824,GO:0004497,GO:0005575,GO:0008150,GO:0008152,GO:0009058,GO:0009719,GO:0009725,GO:0009733,GO:0010033,GO:0016020,GO:0016491,GO:0016705,GO:0016709,GO:0019748,GO:0042221,GO:0044550,GO:0050896,GO:0055114	1.14.13.21	ko:K05280	ko00941,ko00944,ko01100,ko01110,map00941,map00944,map01100,map01110	-	R02442,R03124,R06537,R06538,R08002,R08032	RC00046	ko00000,ko00001,ko00199,ko01000	-	-	-	p450	2
404	scaffold189680:89784-90538_0	13333.ERN15413	2.64e-95	292	COG1902@1|root,KOG0134@2759|Eukaryota,37HFF@33090|Viridiplantae,3G7H2@35493|Streptophyta	35493|Streptophyta	C	12-oxophytodienoate reductase	-	-	1.3.1.42	ko:K05894	ko00592,ko01100,ko01110,map00592,map01100,map01110	M00113	R03401	RC00921	ko00000,ko00001,ko00002,ko01000	-	-	-	Oxidored_FMN	2
405	scaffold189680:90761-90891_0	71139.XP_010042715.1	1.63e-17	77.4	COG1902@1|root,KOG0134@2759|Eukaryota,37HFF@33090|Viridiplantae,3G7H2@35493|Streptophyta	2759|Eukaryota	C	12-oxophytodienoate reductase	OPR3	GO:0000003,GO:0000302,GO:0001101,GO:0003006,GO:0003674,GO:0003824,GO:0005488,GO:0005515,GO:0005575,GO:0005622,GO:0005623,GO:0005737,GO:0005777,GO:0006082,GO:0006629,GO:0006631,GO:0006633,GO:0006950,GO:0006979,GO:0007275,GO:0008150,GO:0008152,GO:0008610,GO:0009058,GO:0009605,GO:0009607,GO:0009620,GO:0009694,GO:0009695,GO:0009791,GO:0009908,GO:0009987,GO:0010035,GO:0010193,GO:0010817,GO:0016053,GO:…	1.3.1.42	ko:K05894	ko00592,ko01100,ko01110,map00592,map01100,map01110	M00113	R03401	RC00921	ko00000,ko00001,ko00002,ko01000	-	-	-	Oxidored_FMN	2
406	scaffold189680:91010-91150_0	4530.OS06T0216300-01	1.62e-12	64.3	COG1902@1|root,KOG0134@2759|Eukaryota,37NVQ@33090|Viridiplantae,3GAWK@35493|Streptophyta,3M4TN@4447|Liliopsida	35493|Streptophyta	C	12-oxophytodienoate reductase	-	GO:0003674,GO:0003824,GO:0005575,GO:0005622,GO:0005623,GO:0006082,GO:0006629,GO:0006631,GO:0006633,GO:0006950,GO:0006952,GO:0008150,GO:0008152,GO:0008610,GO:0009058,GO:0009694,GO:0009695,GO:0009987,GO:0010817,GO:0016053,GO:0016491,GO:0016627,GO:0016628,GO:0016629,GO:0019752,GO:0031407,GO:0031408,GO:0032787,GO:0042445,GO:0042446,GO:0043436,GO:0044237,GO:0044238,GO:0044249,GO:0044255,GO:0044281,GO:…	1.3.1.42	ko:K05894	ko00592,ko01100,ko01110,map00592,map01100,map01110	M00113	R03401	RC00921	ko00000,ko00001,ko00002,ko01000	-	-	-	Oxidored_FMN	2
407	scaffold190817:16729-19511_0	13333.ERM97083	1.19e-289	838	28JTE@1|root,2QUZB@2759|Eukaryota,37R76@33090|Viridiplantae,3GC08@35493|Streptophyta	35493|Streptophyta	S	Protein of unknown function (DUF2921)	-	-	-	-	-	-	-	-	-	-	-	-	DUF2921	2
408	scaffold190859:29905-30044_0	38727.Pavir.J20432.1.p	6.43e-12	62.8	COG1028@1|root,KOG1208@2759|Eukaryota,37RWK@33090|Viridiplantae,3GA0U@35493|Streptophyta,3KYED@4447|Liliopsida,3I2GW@38820|Poales	35493|Streptophyta	Q	Belongs to the short-chain dehydrogenases reductases (SDR) family	FEY	GO:0001523,GO:0003674,GO:0003824,GO:0004033,GO:0004745,GO:0005575,GO:0005622,GO:0005623,GO:0005737,GO:0005783,GO:0005789,GO:0006066,GO:0006081,GO:0006629,GO:0006720,GO:0006721,GO:0008106,GO:0008150,GO:0008152,GO:0009888,GO:0009987,GO:0010073,GO:0010817,GO:0012505,GO:0016020,GO:0016101,GO:0016491,GO:0016614,GO:0016616,GO:0031984,GO:0032501,GO:0032502,GO:0034308,GO:0034754,GO:0042175,GO:0042445,GO:…	-	-	-	-	-	-	-	-	-	-	adh_short	2
409	scaffold191279:73479-74570_0	85681.XP_006444103.1	3.24e-145	422	28NKP@1|root,2QWKW@2759|Eukaryota,37NJD@33090|Viridiplantae,3GCDS@35493|Streptophyta	35493|Streptophyta	S	F-Box protein	-	-	-	-	-	-	-	-	-	-	-	-	F-box	2
410	scaffold191310:183056-183478_0	88036.EFJ19283	1.77e-15	79	COG0642@1|root,KOG0519@2759|Eukaryota,37KWP@33090|Viridiplantae,3GB9R@35493|Streptophyta	35493|Streptophyta	T	Histidine kinase	-	GO:0003674,GO:0003824,GO:0004672,GO:0004673,GO:0005488,GO:0005515,GO:0005575,GO:0005623,GO:0005886,GO:0005911,GO:0006464,GO:0006468,GO:0006793,GO:0006796,GO:0006807,GO:0007154,GO:0007165,GO:0007275,GO:0008150,GO:0008152,GO:0009506,GO:0009553,GO:0009719,GO:0009725,GO:0009735,GO:0009736,GO:0009755,GO:0009888,GO:0009987,GO:0010033,GO:0010087,GO:0016020,GO:0016301,GO:0016310,GO:0016740,GO:0016772,GO:…	-	-	-	-	-	-	-	-	-	-	HATPase_c,HisKA,Response_reg	2
411	scaffold19191:56508-56855_0	29760.VIT_12s0121g00380.t01	3.26e-44	158	COG1472@1|root,2QQ55@2759|Eukaryota,37HXP@33090|Viridiplantae,3G7F4@35493|Streptophyta	35493|Streptophyta	G	beta-D-xylosidase	BXL3	GO:0000272,GO:0002376,GO:0003674,GO:0003824,GO:0004553,GO:0005575,GO:0005576,GO:0005618,GO:0005623,GO:0005975,GO:0005976,GO:0006950,GO:0006952,GO:0006955,GO:0008150,GO:0008152,GO:0009044,GO:0009056,GO:0009057,GO:0009605,GO:0009607,GO:0009627,GO:0009814,GO:0009987,GO:0010383,GO:0010410,GO:0016052,GO:0016787,GO:0016798,GO:0030312,GO:0031221,GO:0031222,GO:0043170,GO:0043207,GO:0044036,GO:0044237,GO:…	3.2.1.37	ko:K15920	ko00520,ko01100,map00520,map01100	-	R01433	RC00467	ko00000,ko00001,ko01000	-	GH3	-	Fn3-like,Glyco_hydro_3,Glyco_hydro_3_C	2
412	scaffold19191:58011-58424_0	264402.Cagra.6943s0024.1.p	3.75e-54	187	COG1472@1|root,2QQ55@2759|Eukaryota,37HXP@33090|Viridiplantae,3G7F4@35493|Streptophyta,3HWAB@3699|Brassicales	35493|Streptophyta	G	Fibronectin type III-like domain	-	GO:0005575,GO:0005618,GO:0005623,GO:0030312,GO:0044464,GO:0071944	3.2.1.37	ko:K15920	ko00520,ko01100,map00520,map01100	-	R01433	RC00467	ko00000,ko00001,ko01000	-	GH3	-	Fn3-like,Glyco_hydro_3,Glyco_hydro_3_C	2
413	scaffold19191:59856-60544_0	57918.XP_004289805.1	8.23e-54	192	COG1472@1|root,2QQ55@2759|Eukaryota,37HXP@33090|Viridiplantae,3G7F4@35493|Streptophyta,4JRZ7@91835|fabids	35493|Streptophyta	G	hydrolase activity, hydrolyzing O-glycosyl compounds	-	GO:0005575,GO:0005618,GO:0005623,GO:0030312,GO:0044464,GO:0071944	3.2.1.37	ko:K15920	ko00520,ko01100,map00520,map01100	-	R01433	RC00467	ko00000,ko00001,ko01000	-	GH3	-	Fn3-like,Glyco_hydro_3,Glyco_hydro_3_C	2
414	scaffold192533:9753-10252_0	4536.ONIVA07G17360.1	1.21e-12	70.9	2CXI7@1|root,2RXQV@2759|Eukaryota,37TRI@33090|Viridiplantae,3GI0T@35493|Streptophyta,3M09M@4447|Liliopsida,3IGKS@38820|Poales	35493|Streptophyta	S	TIR domain	-	-	-	-	-	-	-	-	-	-	-	-	TIR,TIR_2	2
415	scaffold195668:150708-151672_0	71139.XP_010043797.1	4.77e-86	274	KOG1192@1|root,KOG1192@2759|Eukaryota,37PBM@33090|Viridiplantae,3G7DJ@35493|Streptophyta	35493|Streptophyta	CG	Belongs to the UDP-glycosyltransferase family	-	GO:0003674,GO:0003824,GO:0005575,GO:0005622,GO:0005623,GO:0008194,GO:0016740,GO:0016757,GO:0016758,GO:0035251,GO:0043226,GO:0043227,GO:0043229,GO:0043231,GO:0044424,GO:0044464,GO:0046527,GO:0080043,GO:0080044	2.4.1.324	ko:K21374	-	-	-	-	ko00000,ko01000,ko01003	-	GT1	-	UDPGT	2
416	scaffold195668:153040-153610_0	42345.XP_008779947.1	1.23e-38	137	KOG1192@1|root,KOG1192@2759|Eukaryota,37PBM@33090|Viridiplantae,3G7DJ@35493|Streptophyta,3M6IA@4447|Liliopsida	35493|Streptophyta	CG	Belongs to the UDP-glycosyltransferase family	-	GO:0003674,GO:0003824,GO:0005575,GO:0005622,GO:0005623,GO:0008194,GO:0016740,GO:0016757,GO:0016758,GO:0035251,GO:0043226,GO:0043227,GO:0043229,GO:0043231,GO:0044424,GO:0044464,GO:0046527,GO:0080043,GO:0080044	2.4.1.324	ko:K21374	-	-	-	-	ko00000,ko01000,ko01003	-	GT1	-	UDPGT	2
417	scaffold19686:16084-18633_0	4432.XP_010243611.1	1.05e-277	796	KOG4197@1|root,KOG4197@2759|Eukaryota,37N5Q@33090|Viridiplantae,3GH38@35493|Streptophyta	35493|Streptophyta	O	Pentatricopeptide repeat-containing protein	-	GO:0003674,GO:0003676,GO:0003723,GO:0003824,GO:0004518,GO:0004519,GO:0005488,GO:0005575,GO:0005622,GO:0005623,GO:0005737,GO:0006139,GO:0006725,GO:0006807,GO:0008150,GO:0008152,GO:0009451,GO:0009507,GO:0009536,GO:0009987,GO:0016070,GO:0016071,GO:0016556,GO:0016787,GO:0016788,GO:0034641,GO:0043170,GO:0043226,GO:0043227,GO:0043229,GO:0043231,GO:0043412,GO:0044237,GO:0044238,GO:0044424,GO:0044444,GO:…	-	-	-	-	-	-	-	-	-	-	DYW_deaminase,PPR,PPR_2	2
418	scaffold19686:18023-18390_0	218851.Aquca_004_00809.1	5.75e-34	130	KOG4197@1|root,KOG4197@2759|Eukaryota,37SU0@33090|Viridiplantae,3G9R0@35493|Streptophyta	35493|Streptophyta	S	Pentatricopeptide repeat-containing protein	-	-	-	-	-	-	-	-	-	-	-	-	DYW_deaminase,PPR,PPR_2	2
419	scaffold19723:128367-129094_0	42345.XP_008810282.1	6.01e-70	238	COG5059@1|root,KOG0243@2759|Eukaryota,37PAD@33090|Viridiplantae,3GF3D@35493|Streptophyta,3KQRA@4447|Liliopsida	35493|Streptophyta	Z	Belongs to the TRAFAC class myosin-kinesin ATPase superfamily. Kinesin family	-	GO:0003674,GO:0003774,GO:0003777,GO:0003824,GO:0005488,GO:0005515,GO:0005575,GO:0005622,GO:0005623,GO:0005737,GO:0005856,GO:0005871,GO:0005875,GO:0006810,GO:0006928,GO:0007017,GO:0007018,GO:0008017,GO:0008092,GO:0008150,GO:0008574,GO:0009524,GO:0009987,GO:0010970,GO:0015630,GO:0015631,GO:0016462,GO:0016787,GO:0016817,GO:0016818,GO:0016887,GO:0017111,GO:0030705,GO:0032991,GO:0042623,GO:0043226,GO:…	-	ko:K10398	-	-	-	-	ko00000,ko03036,ko04812	-	-	-	Kinesin	2
420	scaffold19723:129621-129776_0	4565.Traes_6BL_9D2F30B5D.1	1.69e-18	78.6	COG5059@1|root,KOG0243@2759|Eukaryota,37PAD@33090|Viridiplantae,3GF3D@35493|Streptophyta,3KQRA@4447|Liliopsida,3I6CU@38820|Poales	35493|Streptophyta	Z	Belongs to the TRAFAC class myosin-kinesin ATPase superfamily. Kinesin family	-	GO:0003674,GO:0003774,GO:0003777,GO:0003824,GO:0005488,GO:0005515,GO:0005575,GO:0005622,GO:0005623,GO:0005737,GO:0005856,GO:0005871,GO:0005875,GO:0006810,GO:0006928,GO:0007017,GO:0007018,GO:0008017,GO:0008092,GO:0008150,GO:0008574,GO:0009524,GO:0009987,GO:0010970,GO:0015630,GO:0015631,GO:0016462,GO:0016787,GO:0016817,GO:0016818,GO:0016887,GO:0017111,GO:0030705,GO:0032991,GO:0042623,GO:0043226,GO:…	-	ko:K10398	-	-	-	-	ko00000,ko03036,ko04812	-	-	-	Kinesin	2
421	scaffold19723:130851-130961_0	88036.EFJ09660	1.48e-12	62.8	COG5059@1|root,KOG0243@2759|Eukaryota,37PAD@33090|Viridiplantae,3GF3D@35493|Streptophyta	35493|Streptophyta	Z	Belongs to the TRAFAC class myosin-kinesin ATPase superfamily. Kinesin family	-	GO:0003674,GO:0003774,GO:0003777,GO:0003824,GO:0005488,GO:0005515,GO:0005575,GO:0005622,GO:0005623,GO:0005737,GO:0005856,GO:0005871,GO:0005875,GO:0006810,GO:0006928,GO:0007017,GO:0007018,GO:0008017,GO:0008092,GO:0008150,GO:0008574,GO:0009524,GO:0009987,GO:0010970,GO:0015630,GO:0015631,GO:0016462,GO:0016787,GO:0016817,GO:0016818,GO:0016887,GO:0017111,GO:0030705,GO:0032991,GO:0042623,GO:0043226,GO:…	-	ko:K10396,ko:K10398	ko04144,ko04728,map04144,map04728	-	-	-	ko00000,ko00001,ko03036,ko04131,ko04147,ko04812	-	-	-	Kinesin	2
422	scaffold19723:131077-133284_0	3656.XP_008460658.1	2.39e-54	209	COG5059@1|root,KOG0243@2759|Eukaryota,37PAD@33090|Viridiplantae,3GF3D@35493|Streptophyta,4JE3S@91835|fabids	35493|Streptophyta	Z	Belongs to the TRAFAC class myosin-kinesin ATPase superfamily. Kinesin family	-	GO:0003674,GO:0003774,GO:0003777,GO:0003824,GO:0005488,GO:0005515,GO:0005575,GO:0005622,GO:0005623,GO:0005737,GO:0005856,GO:0005871,GO:0005875,GO:0006810,GO:0006928,GO:0007017,GO:0007018,GO:0008017,GO:0008092,GO:0008150,GO:0008574,GO:0009524,GO:0009987,GO:0010970,GO:0015630,GO:0015631,GO:0016462,GO:0016787,GO:0016817,GO:0016818,GO:0016887,GO:0017111,GO:0030705,GO:0032991,GO:0042623,GO:0043226,GO:…	-	ko:K10398	-	-	-	-	ko00000,ko03036,ko04812	-	-	-	Kinesin	2
423	scaffold19723:133668-133991_0	4530.OS02T0810200-01	2.01e-13	70.5	COG5059@1|root,KOG0243@2759|Eukaryota,37PAD@33090|Viridiplantae,3GF3D@35493|Streptophyta,3KQRA@4447|Liliopsida,3I6CU@38820|Poales	35493|Streptophyta	Z	Belongs to the TRAFAC class myosin-kinesin ATPase superfamily. Kinesin family	-	GO:0003674,GO:0003774,GO:0003777,GO:0003824,GO:0005488,GO:0005515,GO:0005575,GO:0005622,GO:0005623,GO:0005737,GO:0005856,GO:0005871,GO:0005875,GO:0006810,GO:0006928,GO:0007017,GO:0007018,GO:0008017,GO:0008092,GO:0008150,GO:0008574,GO:0009524,GO:0009987,GO:0010970,GO:0015630,GO:0015631,GO:0016462,GO:0016787,GO:0016817,GO:0016818,GO:0016887,GO:0017111,GO:0030705,GO:0032991,GO:0042623,GO:0043226,GO:…	-	ko:K10398	-	-	-	-	ko00000,ko03036,ko04812	-	-	-	Kinesin	2
424	scaffold197254:89411-93090_0	88036.EFJ30903	6.15e-290	874	COG1112@1|root,KOG1807@2759|Eukaryota,389T7@33090|Viridiplantae,3GYWR@35493|Streptophyta	2759|Eukaryota	L	AAA domain	ZNFX1	GO:0000981,GO:0003674,GO:0003700,GO:0003824,GO:0004386,GO:0005575,GO:0005622,GO:0005623,GO:0005634,GO:0005737,GO:0006325,GO:0006342,GO:0006355,GO:0006357,GO:0006996,GO:0008150,GO:0009889,GO:0009890,GO:0009892,GO:0009987,GO:0010468,GO:0010556,GO:0010558,GO:0010605,GO:0010629,GO:0016043,GO:0016458,GO:0016462,GO:0016787,GO:0016817,GO:0016818,GO:0017111,GO:0019219,GO:0019222,GO:0030702,GO:0030880,GO:…	3.6.4.13	ko:K11701,ko:K12862,ko:K21626	ko03040,map03040	M00353,M00355	-	-	ko00000,ko00001,ko00002,ko01000,ko03000,ko03036,ko03041,ko03400	-	-	-	AAA_11,AAA_12	2
425	scaffold198620:26809-26979_0	3218.PP1S388_8V6.1	1.54e-11	60.8	COG0489@1|root,KOG3022@2759|Eukaryota	3218.PP1S388_8V6.1|-	D	Component of the cytosolic iron-sulfur (Fe S) protein assembly (CIA) machinery. Required for maturation of extramitochondrial Fe-S proteins. The NBP35-CFD1 heterotetramer forms a Fe-S scaffold complex, mediating the de novo assembly of an Fe-S cluster and its transfer to target apoproteins	-	-	-	-	-	-	-	-	-	-	-	-	-	2
426	scaffold200034:32021-32695_0	37682.EMT05831	1.38e-21	95.1	2AQVD@1|root,2RZJS@2759|Eukaryota,37UP9@33090|Viridiplantae,3GIWT@35493|Streptophyta,3KZJJ@4447|Liliopsida,3IH3M@38820|Poales	35493|Streptophyta	B	linker histone H1 and H5 family	-	GO:0005575,GO:0005622,GO:0005623,GO:0005634,GO:0005694,GO:0043226,GO:0043227,GO:0043228,GO:0043229,GO:0043231,GO:0043232,GO:0044424,GO:0044464	-	ko:K11275	-	-	-	-	ko00000,ko03036	-	-	-	Linker_histone	2
427	scaffold20053:12819-13150_0	42345.XP_008803424.1	4.49e-23	95.1	2CXS8@1|root,2RZD2@2759|Eukaryota,37V2B@33090|Viridiplantae,3GIUR@35493|Streptophyta,3M6W6@4447|Liliopsida	35493|Streptophyta	S	Belongs to the plant LTP family	-	-	-	-	-	-	-	-	-	-	-	-	LTP_2	2
428	scaffold20183:212635-213189_0	3760.EMJ05343	3.68e-68	213	29XXM@1|root,2RXST@2759|Eukaryota,37U45@33090|Viridiplantae,3GHW8@35493|Streptophyta,4JSUE@91835|fabids	35493|Streptophyta	S	Dirigent proteins impart stereoselectivity on the phenoxy radical-coupling reaction, yielding optically active lignans from two molecules of coniferyl alcohol in the biosynthesis of lignans, flavonolignans, and alkaloids and thus plays a central role in plant secondary metabolism	-	-	-	-	-	-	-	-	-	-	-	-	Dirigent	2
429	scaffold20205:126901-127041_0	3659.XP_004169964.1	1.09e-11	61.2	COG0673@1|root,KOG2742@2759|Eukaryota,37MM9@33090|Viridiplantae,3GD1J@35493|Streptophyta,4JDPB@91835|fabids	35493|Streptophyta	KL	Oxidoreductase family, C-terminal alpha/beta domain	-	GO:0003674,GO:0003824,GO:0006139,GO:0006725,GO:0006732,GO:0006733,GO:0006739,GO:0006740,GO:0006753,GO:0006793,GO:0006796,GO:0006807,GO:0008150,GO:0008152,GO:0009117,GO:0009987,GO:0016491,GO:0019362,GO:0019637,GO:0034641,GO:0044237,GO:0044238,GO:0044281,GO:0046483,GO:0046496,GO:0051186,GO:0055086,GO:0055114,GO:0071704,GO:0072524,GO:1901360,GO:1901564	-	-	-	-	-	-	-	-	-	-	GFO_IDH_MocA,GFO_IDH_MocA_C	2
430	scaffold20250:316205-316357_0	29760.VIT_16s0050g02170.t01	1.43e-15	72	KOG1974@1|root,KOG1974@2759|Eukaryota,37HIP@33090|Viridiplantae,3GERV@35493|Streptophyta	35493|Streptophyta	L	Protein timeless homolog	-	-	-	ko:K03155	-	-	-	-	ko00000,ko03400	-	-	-	TIMELESS,TIMELESS_C	2
431	scaffold20250:317287-317446_0	29760.VIT_16s0050g02170.t01	3.13e-15	71.2	KOG1974@1|root,KOG1974@2759|Eukaryota,37HIP@33090|Viridiplantae,3GERV@35493|Streptophyta	35493|Streptophyta	L	Protein timeless homolog	-	-	-	ko:K03155	-	-	-	-	ko00000,ko03400	-	-	-	TIMELESS,TIMELESS_C	2
432	scaffold20264:96285-96781_0	59689.fgenesh2_kg.3__3225__AT2G19480.2	7.2e-53	179	KOG1507@1|root,KOG1507@2759|Eukaryota,37P8A@33090|Viridiplantae,3GEGH@35493|Streptophyta	35493|Streptophyta	BD	Belongs to the nucleosome assembly protein (NAP) family	-	GO:0000724,GO:0000725,GO:0003674,GO:0005488,GO:0005515,GO:0005575,GO:0005622,GO:0005623,GO:0005634,GO:0005737,GO:0005829,GO:0005886,GO:0006139,GO:0006259,GO:0006281,GO:0006302,GO:0006310,GO:0006725,GO:0006807,GO:0006950,GO:0006974,GO:0008150,GO:0008152,GO:0009292,GO:0009294,GO:0009987,GO:0010035,GO:0010038,GO:0016020,GO:0016444,GO:0033554,GO:0034641,GO:0042221,GO:0042393,GO:0042802,GO:0043170,GO:…	-	ko:K11279	-	-	-	-	ko00000,ko03036	-	-	-	NAP	2
433	scaffold203014:67104-67354_0	102107.XP_008222886.1	1.45e-33	119	COG0580@1|root,KOG0223@2759|Eukaryota,37HHG@33090|Viridiplantae,3GA6H@35493|Streptophyta,4JHBH@91835|fabids	35493|Streptophyta	G	Belongs to the MIP aquaporin (TC 1.A.8) family	-	GO:0000325,GO:0003674,GO:0005215,GO:0005372,GO:0005575,GO:0005622,GO:0005623,GO:0005737,GO:0005773,GO:0005774,GO:0005886,GO:0005887,GO:0006810,GO:0006811,GO:0006833,GO:0008150,GO:0009705,GO:0015204,GO:0015250,GO:0015267,GO:0015318,GO:0015840,GO:0016020,GO:0016021,GO:0019755,GO:0022803,GO:0022838,GO:0022857,GO:0031090,GO:0031224,GO:0031226,GO:0034220,GO:0042044,GO:0042807,GO:0042886,GO:0042887,GO:…	-	ko:K09873	-	-	-	-	ko00000,ko02000	1.A.8.10	-	-	MIP	2
434	scaffold203014:67449-67826_0	4641.GSMUA_Achr4P26010_001	6.21e-63	199	COG0580@1|root,KOG0223@2759|Eukaryota,37PC5@33090|Viridiplantae,3GGC0@35493|Streptophyta,3KVZ1@4447|Liliopsida	35493|Streptophyta	G	Belongs to the MIP aquaporin (TC 1.A.8) family	BETA-TIP	GO:0000003,GO:0000322,GO:0000325,GO:0000326,GO:0003006,GO:0003674,GO:0005215,GO:0005372,GO:0005575,GO:0005622,GO:0005623,GO:0005737,GO:0005773,GO:0005774,GO:0005886,GO:0005887,GO:0006810,GO:0006811,GO:0006833,GO:0006914,GO:0007275,GO:0008150,GO:0008152,GO:0009056,GO:0009705,GO:0009791,GO:0009987,GO:0010154,GO:0010431,GO:0015250,GO:0015267,GO:0015318,GO:0016020,GO:0016021,GO:0021700,GO:0022414,GO:…	-	ko:K09873	-	-	-	-	ko00000,ko02000	1.A.8.10	-	-	MIP	2
435	scaffold203599:104329-106812_0	3218.PP1S13_264V6.1	4.67e-203	602	KOG4197@1|root,KOG4197@2759|Eukaryota,37M8J@33090|Viridiplantae,3GA8V@35493|Streptophyta	2759|Eukaryota	S	Pentatricopeptide repeat-containing protein	-	-	-	-	-	-	-	-	-	-	-	-	PPR_2	2
436	scaffold20476:204831-207278_0	3750.XP_008369259.1	3.81e-195	583	COG0515@1|root,KOG1187@2759|Eukaryota,37I05@33090|Viridiplantae,3GAGH@35493|Streptophyta,4JE4S@91835|fabids	35493|Streptophyta	T	Serine threonine-protein kinase-like protein	-	GO:0003674,GO:0005488,GO:0005515,GO:0042802,GO:0042803,GO:0046983	2.7.11.1	ko:K04730	ko04010,ko04064,ko04620,ko04624,ko04722,ko05133,ko05140,ko05142,ko05145,ko05152,ko05162,ko05169,map04010,map04064,map04620,map04624,map04722,map05133,map05140,map05142,map05145,map05152,map05162,map05169	M00686	-	-	ko00000,ko00001,ko00002,ko01000,ko01001	-	-	-	Pkinase,Pkinase_Tyr,RCC1_2	2
437	scaffold20493:19742-20407_0	4565.Traes_6AS_D000E8364.2	1.93e-54	193	2CMNF@1|root,2QQZG@2759|Eukaryota,37REE@33090|Viridiplantae,3GDDM@35493|Streptophyta,3M3A9@4447|Liliopsida,3IHUS@38820|Poales	35493|Streptophyta	S	methyl-CpG-binding domain-containing protein	-	GO:0000003,GO:0000166,GO:0000228,GO:0000785,GO:0000790,GO:0000792,GO:0001763,GO:0003006,GO:0003674,GO:0003676,GO:0003677,GO:0003824,GO:0004402,GO:0004842,GO:0005488,GO:0005515,GO:0005575,GO:0005622,GO:0005623,GO:0005634,GO:0005694,GO:0005720,GO:0005911,GO:0006139,GO:0006259,GO:0006325,GO:0006355,GO:0006464,GO:0006473,GO:0006475,GO:0006725,GO:0006807,GO:0006996,GO:0007275,GO:0008080,GO:0008150,GO:…	-	-	-	-	-	-	-	-	-	-	Bromodomain,DDT,FYRC,FYRN,MBD,PHD,WHIM1,WSD	2
438	scaffold205041:31555-32132_0	3750.XP_008354424.1	8.69e-79	245	2CMFN@1|root,2QQ7W@2759|Eukaryota,37K88@33090|Viridiplantae,3G7D0@35493|Streptophyta,4JNTI@91835|fabids	35493|Streptophyta	K	No apical meristem (NAM) protein	-	GO:0000075,GO:0000077,GO:0003674,GO:0003676,GO:0003677,GO:0003700,GO:0005488,GO:0006355,GO:0006950,GO:0006974,GO:0008150,GO:0009314,GO:0009628,GO:0009889,GO:0009987,GO:0010212,GO:0010332,GO:0010468,GO:0010556,GO:0010564,GO:0019219,GO:0019222,GO:0031323,GO:0031326,GO:0031570,GO:0033043,GO:0033554,GO:0040020,GO:0043565,GO:0045786,GO:0048519,GO:0048523,GO:0050789,GO:0050794,GO:0050896,GO:0051128,GO:…	-	-	-	-	-	-	-	-	-	-	NAM	2
439	scaffold205041:32247-32433_0	4432.XP_010260337.1	1.05e-33	123	28IRN@1|root,2QR2Y@2759|Eukaryota,37NCT@33090|Viridiplantae,3GBEZ@35493|Streptophyta	35493|Streptophyta	K	(NAC) domain-containing protein	-	GO:0000075,GO:0000077,GO:0003674,GO:0003676,GO:0003677,GO:0003700,GO:0005488,GO:0005575,GO:0005622,GO:0005623,GO:0005634,GO:0006355,GO:0006950,GO:0006974,GO:0008150,GO:0009314,GO:0009628,GO:0009889,GO:0009891,GO:0009893,GO:0009987,GO:0010212,GO:0010332,GO:0010468,GO:0010556,GO:0010557,GO:0010564,GO:0010604,GO:0010628,GO:0019219,GO:0019222,GO:0031323,GO:0031325,GO:0031326,GO:0031328,GO:0031570,GO:…	-	-	-	-	-	-	-	-	-	-	NAM	2
440	scaffold20526:84796-85650_0	88036.EFJ13111	3.43e-34	129	2A6US@1|root,2RYCP@2759|Eukaryota,37TTC@33090|Viridiplantae,3GI9Y@35493|Streptophyta	35493|Streptophyta	S	F-box protein	-	GO:0000003,GO:0000151,GO:0003006,GO:0005575,GO:0005622,GO:0005623,GO:0005634,GO:0007275,GO:0008150,GO:0009791,GO:0009845,GO:0010154,GO:0010162,GO:0010431,GO:0019005,GO:0021700,GO:0022414,GO:0022611,GO:0031461,GO:0032501,GO:0032502,GO:0032504,GO:0032991,GO:0043226,GO:0043227,GO:0043229,GO:0043231,GO:0044424,GO:0044464,GO:0048316,GO:0048608,GO:0048609,GO:0048731,GO:0048856,GO:0061458,GO:0071695,GO:…	-	ko:K14495	ko04075,map04075	-	-	-	ko00000,ko00001,ko04121	-	-	-	F-box,F-box-like	2
441	scaffold205473:83128-84223_0	4432.XP_010255714.1	5.53e-80	274	2EF04@1|root,2SK9Z@2759|Eukaryota,37Z2C@33090|Viridiplantae,3GNBV@35493|Streptophyta	35493|Streptophyta	S	TIR domain	-	-	-	-	-	-	-	-	-	-	-	-	LRR_1,NB-ARC,TIR	2
442	scaffold205473:84316-84857_0	15368.BRADI1G24377.1	3.91e-26	106	2CXI7@1|root,2RXQV@2759|Eukaryota,37TRI@33090|Viridiplantae,3GI0T@35493|Streptophyta,3M09M@4447|Liliopsida,3IGKS@38820|Poales	35493|Streptophyta	S	TIR domain	-	-	-	-	-	-	-	-	-	-	-	-	TIR,TIR_2	2
443	scaffold20588:68202-68646_0	38727.Pavir.J22989.1.p	4.88e-20	90.9	2CU6P@1|root,2RJJK@2759|Eukaryota,37T0A@33090|Viridiplantae,3GFI7@35493|Streptophyta,3M9H1@4447|Liliopsida,3IQMS@38820|Poales	35493|Streptophyta	S	hAT family C-terminal dimerisation region	-	-	-	-	-	-	-	-	-	-	-	-	DUF659,Dimer_Tnp_hAT	2
444	scaffold2059:14580-14806_0	38727.Pavir.J18984.1.p	1.11e-31	117	COG2273@1|root,2QQC7@2759|Eukaryota,37K4Z@33090|Viridiplantae,3GA9M@35493|Streptophyta,3M3NV@4447|Liliopsida,3IF5H@38820|Poales	35493|Streptophyta	G	Catalyzes xyloglucan endohydrolysis (XEH) and or endotransglycosylation (XET). Cleaves and religates xyloglucan polymers, an essential constituent of the primary cell wall, and thereby participates in cell wall construction of growing tissues	-	GO:0008150,GO:0008152,GO:0009056,GO:0009987,GO:0016998,GO:0043170,GO:0044036,GO:0044237,GO:0044248,GO:0044260,GO:0071554,GO:0071704	2.4.1.207	ko:K08235	-	-	-	-	ko00000,ko01000	-	-	-	Glyco_hydro_16,XET_C	2
445	scaffold2059:15246-15657_0	13333.ERN09914	8.2e-47	157	COG2273@1|root,2QQC7@2759|Eukaryota,37K4Z@33090|Viridiplantae,3GA9M@35493|Streptophyta	35493|Streptophyta	G	Catalyzes xyloglucan endohydrolysis (XEH) and or endotransglycosylation (XET). Cleaves and religates xyloglucan polymers, an essential constituent of the primary cell wall, and thereby participates in cell wall construction of growing tissues	-	GO:0003674,GO:0003824,GO:0004553,GO:0008150,GO:0008152,GO:0009056,GO:0009987,GO:0016787,GO:0016798,GO:0016998,GO:0033946,GO:0043170,GO:0044036,GO:0044237,GO:0044248,GO:0044260,GO:0052736,GO:0071554,GO:0071704	2.4.1.207	ko:K08235	-	-	-	-	ko00000,ko01000	-	-	-	Glyco_hydro_16,XET_C	2
446	scaffold206928:70508-70664_0	71139.XP_010053326.1	3.03e-14	69.3	COG2075@1|root,KOG1722@2759|Eukaryota,37RC6@33090|Viridiplantae,3GE6B@35493|Streptophyta	35493|Streptophyta	J	60S ribosomal Protein	-	-	-	ko:K02896	ko03010,map03010	M00177,M00179	-	-	br01610,ko00000,ko00001,ko00002,ko03011	-	-	-	Ribosomal_L24e	2
447	scaffold206928:70841-70989_0	3218.PP1S63_123V6.1	3.91e-19	81.6	COG2075@1|root,KOG1722@2759|Eukaryota,37RC6@33090|Viridiplantae,3GE6B@35493|Streptophyta	35493|Streptophyta	J	60S ribosomal Protein	-	-	-	ko:K02896	ko03010,map03010	M00177,M00179	-	-	br01610,ko00000,ko00001,ko00002,ko03011	-	-	-	Ribosomal_L24e	2
448	scaffold206928:71073-71174_0	38727.Pavir.Ia00134.1.p	4.22e-17	73.6	COG2075@1|root,KOG1722@2759|Eukaryota,37RC6@33090|Viridiplantae,3GE6B@35493|Streptophyta,3KYNK@4447|Liliopsida,3I737@38820|Poales	35493|Streptophyta	J	60S ribosomal protein	-	-	-	ko:K02896	ko03010,map03010	M00177,M00179	-	-	br01610,ko00000,ko00001,ko00002,ko03011	-	-	-	Ribosomal_L24e	2
449	scaffold207012:50010-50330_0	3983.cassava4.1_019578m	3.6e-37	128	2AJ64@1|root,2RZ6B@2759|Eukaryota,37UKU@33090|Viridiplantae,3GIZI@35493|Streptophyta,4JPEC@91835|fabids	35493|Streptophyta	S	elf4-like	-	-	-	-	-	-	-	-	-	-	-	-	DUF1313	2
450	scaffold207019:1502-2585_0	4432.XP_010255714.1	4.53e-85	288	2EF04@1|root,2SK9Z@2759|Eukaryota,37Z2C@33090|Viridiplantae,3GNBV@35493|Streptophyta	35493|Streptophyta	S	TIR domain	-	-	-	-	-	-	-	-	-	-	-	-	LRR_1,NB-ARC,TIR	2
451	scaffold207019:848-1377_0	71139.XP_010046784.1	6.14e-35	137	28I92@1|root,2QQJE@2759|Eukaryota,37M5G@33090|Viridiplantae,3GG0S@35493|Streptophyta	35493|Streptophyta	S	TMV resistance protein N-like	-	-	-	-	-	-	-	-	-	-	-	-	LRR_5,NB-ARC,TIR	2
452	scaffold207352:17289-17489_0	4081.Solyc12g055980.1.1	1.29e-13	68.2	2CMQJ@1|root,2QRF6@2759|Eukaryota,37PRS@33090|Viridiplantae,3GBAT@35493|Streptophyta,44EXY@71274|asterids	35493|Streptophyta	G	Glycosyl hydrolase family 9	GH9C2	-	3.2.1.4	ko:K01179	ko00500,ko01100,map00500,map01100	-	R06200,R11307,R11308	-	ko00000,ko00001,ko01000	-	GH5,GH9	-	CBM49,Glyco_hydro_9	2
453	scaffold207352:17589-17801_0	3983.cassava4.1_023568m	4.84e-31	115	2CMD2@1|root,2QQ06@2759|Eukaryota,37KF8@33090|Viridiplantae,3GXB7@35493|Streptophyta,4JT5S@91835|fabids	35493|Streptophyta	G	Belongs to the glycosyl hydrolase 9 (cellulase E) family	-	-	3.2.1.4	ko:K01179	ko00500,ko01100,map00500,map01100	-	R06200,R11307,R11308	-	ko00000,ko00001,ko01000	-	GH5,GH9	-	Glyco_hydro_9	2
454	scaffold207352:17925-18125_0	13333.ERN10856	7.31e-26	101	28NJK@1|root,2QV58@2759|Eukaryota,37S6X@33090|Viridiplantae,3GABC@35493|Streptophyta	35493|Streptophyta	G	Endoglucanase	-	-	3.2.1.4	ko:K01179	ko00500,ko01100,map00500,map01100	-	R06200,R11307,R11308	-	ko00000,ko00001,ko01000	-	GH5,GH9	-	Glyco_hydro_9	2
455	scaffold207352:19696-19859_0	3983.cassava4.1_031999m	3.03e-11	63.2	2CMQJ@1|root,2QRF6@2759|Eukaryota,37Q2R@33090|Viridiplantae,3GDIK@35493|Streptophyta,4JWCW@91835|fabids	35493|Streptophyta	G	Glycosyl hydrolase family 9	-	-	-	-	-	-	-	-	-	-	-	-	Glyco_hydro_9	2
456	scaffold207352:19996-20343_0	42345.XP_008786736.1	2.94e-34	130	2CMD2@1|root,2QQ06@2759|Eukaryota,37KF8@33090|Viridiplantae,3GXB7@35493|Streptophyta,3KM8E@4447|Liliopsida	35493|Streptophyta	G	Glycosyl hydrolase family 9	-	-	3.2.1.4	ko:K01179	ko00500,ko01100,map00500,map01100	-	R06200,R11307,R11308	-	ko00000,ko00001,ko01000	-	GH5,GH9	-	Glyco_hydro_9	2
457	scaffold209285:31929-33873_0	218851.Aquca_006_00193.1	3.39e-268	780	2CMP8@1|root,2QR60@2759|Eukaryota,37MJT@33090|Viridiplantae,3GCW2@35493|Streptophyta	35493|Streptophyta	S	Translocase of chloroplast	-	GO:0003674,GO:0004888,GO:0005488,GO:0005515,GO:0005575,GO:0005622,GO:0005623,GO:0005737,GO:0006605,GO:0006810,GO:0006886,GO:0007154,GO:0007165,GO:0008104,GO:0008150,GO:0009507,GO:0009526,GO:0009527,GO:0009536,GO:0009707,GO:0009941,GO:0009987,GO:0015031,GO:0015833,GO:0016020,GO:0019867,GO:0019899,GO:0023052,GO:0031090,GO:0031967,GO:0031968,GO:0031969,GO:0031975,GO:0033036,GO:0033365,GO:0034613,GO:…	-	-	-	-	-	-	-	-	-	-	AIG1,TOC159_MAD	2
458	scaffold20974:27201-27426_0	77586.LPERR04G18670.1	2.88e-12	67.4	COG1112@1|root,KOG1801@2759|Eukaryota,37RMF@33090|Viridiplantae,3G7ST@35493|Streptophyta	33090|Viridiplantae	A	superfamily. Protein	-	-	-	ko:K10706	-	-	-	-	ko00000,ko01000,ko03021	-	-	-	AAA_11,AAA_12	2
459	scaffold20974:27618-27870_0	3659.XP_004173606.1	1.98e-19	84.3	COG1112@1|root,KOG1801@2759|Eukaryota,37RMF@33090|Viridiplantae,3G7ST@35493|Streptophyta,4JG4I@91835|fabids	35493|Streptophyta	A	TPR and ankyrin repeat-containing protein	-	-	-	ko:K10706	-	-	-	-	ko00000,ko01000,ko03021	-	-	-	AAA_11,AAA_12,AAA_19,UvrD-helicase,UvrD_C	2
460	scaffold209765:18899-19985_0	4432.XP_010255714.1	1.85e-77	267	2EF04@1|root,2SK9Z@2759|Eukaryota,37Z2C@33090|Viridiplantae,3GNBV@35493|Streptophyta	35493|Streptophyta	S	TIR domain	-	-	-	-	-	-	-	-	-	-	-	-	LRR_1,NB-ARC,TIR	2
461	scaffold209765:20107-20708_0	40148.OGLUM07G18800.1	4.82e-23	98.6	2CXI7@1|root,2RXQV@2759|Eukaryota,37TRI@33090|Viridiplantae,3GI0T@35493|Streptophyta,3M09M@4447|Liliopsida,3IGKS@38820|Poales	35493|Streptophyta	S	TIR domain	-	-	-	-	-	-	-	-	-	-	-	-	TIR,TIR_2	2
462	scaffold209826:41854-42050_0	2711.XP_006479337.1	7.21e-29	110	COG2801@1|root,KOG0017@2759|Eukaryota,37Q7M@33090|Viridiplantae,3GF55@35493|Streptophyta	35493|Streptophyta	G	Catalyzes xyloglucan endohydrolysis (XEH) and or endotransglycosylation (XET). Cleaves and religates xyloglucan polymers, an essential constituent of the primary cell wall, and thereby participates in cell wall construction of growing tissues	-	GO:0000003,GO:0003006,GO:0003674,GO:0003824,GO:0005975,GO:0005976,GO:0006073,GO:0007275,GO:0008150,GO:0008152,GO:0009314,GO:0009416,GO:0009628,GO:0009648,GO:0009791,GO:0009832,GO:0009987,GO:0010228,GO:0016740,GO:0016757,GO:0016758,GO:0016762,GO:0022414,GO:0030243,GO:0032501,GO:0032502,GO:0042546,GO:0043170,GO:0044042,GO:0044085,GO:0044237,GO:0044238,GO:0044260,GO:0044262,GO:0044264,GO:0046527,GO:…	2.4.1.207	ko:K08235	-	-	-	-	ko00000,ko01000	-	-	-	Glyco_hydro_16,XET_C	2
463	scaffold209826:42164-42575_0	4641.GSMUA_Achr3P26220_001	3.53e-40	142	COG2273@1|root,2QSMA@2759|Eukaryota,37RXU@33090|Viridiplantae,3G9QH@35493|Streptophyta,3M4GB@4447|Liliopsida	35493|Streptophyta	G	Catalyzes xyloglucan endohydrolysis (XEH) and or endotransglycosylation (XET). Cleaves and religates xyloglucan polymers, an essential constituent of the primary cell wall, and thereby participates in cell wall construction of growing tissues	XTH7	GO:0001101,GO:0006950,GO:0008150,GO:0009414,GO:0009415,GO:0009628,GO:0010035,GO:0042221,GO:0050896,GO:1901700	2.4.1.207	ko:K08235	-	-	-	-	ko00000,ko01000	-	-	-	Glyco_hydro_16,XET_C	2
464	scaffold209826:46482-47164_0	85681.XP_006432458.1	3.27e-55	194	COG0515@1|root,2QWMX@2759|Eukaryota,37QT3@33090|Viridiplantae,3GADU@35493|Streptophyta	35493|Streptophyta	T	Legume lectin domain	-	-	-	-	-	-	-	-	-	-	-	-	Lectin_legB,Pkinase	2
465	scaffold210372:54934-55291_0	981085.XP_010086611.1	2.17e-13	70.5	2B1PY@1|root,2S0AW@2759|Eukaryota,37V0D@33090|Viridiplantae,3GINR@35493|Streptophyta,4JQ4Q@91835|fabids	35493|Streptophyta	O	Belongs to the plant LTP family	-	GO:0005575,GO:0005623,GO:0005886,GO:0016020,GO:0031224,GO:0031225,GO:0031226,GO:0044425,GO:0044459,GO:0044464,GO:0046658,GO:0071944	-	-	-	-	-	-	-	-	-	-	LTP_2	2
466	scaffold210536:88630-88796_0	3750.XP_008351407.1	1.63e-12	64.3	COG4886@1|root,KOG0619@2759|Eukaryota,37RID@33090|Viridiplantae,3G94Y@35493|Streptophyta,4JD6N@91835|fabids	35493|Streptophyta	S	Plant intracellular ras-group-related LRR protein	-	-	-	-	-	-	-	-	-	-	-	-	LRR_8	2
467	scaffold210536:88904-89675_0	3694.POPTR_0006s07210.1	3.25e-21	96.7	COG4886@1|root,KOG0619@2759|Eukaryota,37RID@33090|Viridiplantae,3G94Y@35493|Streptophyta,4JD6N@91835|fabids	35493|Streptophyta	S	Plant intracellular ras-group-related LRR protein	-	-	-	-	-	-	-	-	-	-	-	-	LRR_1,LRR_8	2
468	scaffold212113:31101-32606_0	42345.XP_008803433.1	2.36e-205	588	COG0318@1|root,KOG1176@2759|Eukaryota,37KT0@33090|Viridiplantae,3GFGR@35493|Streptophyta,3M314@4447|Liliopsida	35493|Streptophyta	I	AMP-binding enzyme	-	GO:0005575,GO:0005622,GO:0005623,GO:0005737,GO:0005777,GO:0042579,GO:0043226,GO:0043227,GO:0043229,GO:0043231,GO:0044424,GO:0044444,GO:0044464	-	-	-	-	-	-	-	-	-	-	AMP-binding,AMP-binding_C	2
469	scaffold2137:43083-43272_0	90675.XP_010497242.1	5.18e-13	65.9	COG4677@1|root,2QQMT@2759|Eukaryota,37N2J@33090|Viridiplantae,3GC93@35493|Streptophyta,3HP9M@3699|Brassicales	35493|Streptophyta	G	Pectinesterase	-	GO:0005575,GO:0005618,GO:0005622,GO:0005623,GO:0005737,GO:0030312,GO:0044424,GO:0044464,GO:0071944	3.1.1.11	ko:K01051	ko00040,ko01100,map00040,map01100	M00081	R02362	RC00460,RC00461	ko00000,ko00001,ko00002,ko01000	-	-	-	Pectinesterase	2
470	scaffold214043:69363-70222_0	3760.EMJ06179	1.03e-21	102	28K4X@1|root,2QVEF@2759|Eukaryota,37NUY@33090|Viridiplantae,3GCFE@35493|Streptophyta,4JS9R@91835|fabids	35493|Streptophyta	S	PMR5 N terminal Domain	-	-	-	-	-	-	-	-	-	-	-	-	PC-Esterase,PMR5N	2
471	scaffold214043:70493-70685_0	4565.Traes_7AS_96A285B52.1	1.72e-25	99.8	28K4X@1|root,2QVEF@2759|Eukaryota,37NUY@33090|Viridiplantae,3GCFE@35493|Streptophyta,3KR9U@4447|Liliopsida,3IAUP@38820|Poales	35493|Streptophyta	S	GDSL/SGNH-like Acyl-Esterase family found in Pmr5 and Cas1p	-	-	-	-	-	-	-	-	-	-	-	-	PC-Esterase,PMR5N	2
472	scaffold214043:70802-70995_0	4081.Solyc01g016380.2.1	3.84e-26	102	28K4X@1|root,2RANF@2759|Eukaryota,37KXU@33090|Viridiplantae,3GEHG@35493|Streptophyta,44C09@71274|asterids	35493|Streptophyta	S	GDSL/SGNH-like Acyl-Esterase family found in Pmr5 and Cas1p	-	-	-	-	-	-	-	-	-	-	-	-	PC-Esterase,PMR5N	2
473	scaffold214043:71141-71299_0	4565.Traes_6BL_F1F732340.1	5.15e-18	80.5	28K4X@1|root,2QVEF@2759|Eukaryota,37NUY@33090|Viridiplantae,3GCFE@35493|Streptophyta,3KYV8@4447|Liliopsida,3I3ES@38820|Poales	35493|Streptophyta	S	GDSL/SGNH-like Acyl-Esterase family found in Pmr5 and Cas1p	-	-	-	-	-	-	-	-	-	-	-	-	PC-Esterase,PMR5N	2
474	scaffold214043:71444-71786_0	4565.Traes_7AS_BB973D9B2.1	1.03e-56	178	28K4X@1|root,2QVEF@2759|Eukaryota,37NUY@33090|Viridiplantae,3GCFE@35493|Streptophyta,3KR9U@4447|Liliopsida,3IAUP@38820|Poales	35493|Streptophyta	S	GDSL/SGNH-like Acyl-Esterase family found in Pmr5 and Cas1p	-	-	-	-	-	-	-	-	-	-	-	-	PC-Esterase,PMR5N	2
475	scaffold21473:28208-28534_0	13333.ERN07652	2.23e-13	71.6	KOG4197@1|root,KOG4197@2759|Eukaryota,37I62@33090|Viridiplantae,3GAZB@35493|Streptophyta	35493|Streptophyta	I	Pentatricopeptide repeat-containing protein	-	GO:0003674,GO:0003676,GO:0003723,GO:0003824,GO:0004518,GO:0004519,GO:0005488,GO:0005575,GO:0005622,GO:0005623,GO:0006139,GO:0006725,GO:0006807,GO:0008150,GO:0008152,GO:0009451,GO:0009987,GO:0016070,GO:0016787,GO:0016788,GO:0034641,GO:0043170,GO:0043226,GO:0043227,GO:0043229,GO:0043231,GO:0043412,GO:0044237,GO:0044238,GO:0044424,GO:0044464,GO:0046483,GO:0071704,GO:0090304,GO:0090305,GO:0097159,GO:…	-	-	-	-	-	-	-	-	-	-	DYW_deaminase,PPR,PPR_2	2
476	scaffold21473:28576-28785_0	3988.XP_002531869.1	1.71e-11	64.3	KOG4197@1|root,KOG4197@2759|Eukaryota,37QP8@33090|Viridiplantae,3G8JN@35493|Streptophyta,4JM3B@91835|fabids	35493|Streptophyta	S	Pentatricopeptide repeat-containing protein	-	-	3.5.1.49	ko:K01455	ko00460,ko00630,ko00910,ko01200,map00460,map00630,map00910,map01200	-	R00524	RC02432,RC02810	ko00000,ko00001,ko01000	-	-	-	PPR,PPR_2,PPR_3	2
477	scaffold21491:118051-119664_0	4641.GSMUA_Achr1P26360_001	1.8e-117	377	COG5078@1|root,KOG0895@2759|Eukaryota,37MBA@33090|Viridiplantae,3GDBW@35493|Streptophyta,3KU8A@4447|Liliopsida	35493|Streptophyta	O	Belongs to the ubiquitin-conjugating enzyme family	-	-	2.3.2.24	ko:K10581	ko04120,map04120	-	-	-	ko00000,ko00001,ko01000,ko04121	-	-	-	UQ_con	2
478	scaffold21491:120932-121071_0	4565.Traes_3AS_9148DCE15.1	5.36e-17	77.4	COG5078@1|root,KOG0895@2759|Eukaryota,37QIF@33090|Viridiplantae,3G8G9@35493|Streptophyta,3KTRT@4447|Liliopsida,3IDRK@38820|Poales	35493|Streptophyta	O	Belongs to the ubiquitin-conjugating enzyme family	-	-	2.3.2.24	ko:K10581	ko04120,map04120	-	-	-	ko00000,ko00001,ko01000,ko04121	-	-	-	UQ_con	2
479	scaffold21491:121180-121491_0	4577.GRMZM2G086583_P01	3.55e-48	161	COG5078@1|root,KOG0895@2759|Eukaryota,37MBA@33090|Viridiplantae,3GDBW@35493|Streptophyta,3KU8A@4447|Liliopsida,3IA2S@38820|Poales	35493|Streptophyta	O	Belongs to the ubiquitin-conjugating enzyme family	-	-	2.3.2.24	ko:K10581	ko04120,map04120	-	-	-	ko00000,ko00001,ko01000,ko04121	-	-	-	UQ_con	2
480	scaffold21491:121583-121813_0	3649.evm.model.supercontig_20.98	5.64e-19	80.5	COG5078@1|root,KOG0895@2759|Eukaryota,37MBA@33090|Viridiplantae,3GDBW@35493|Streptophyta,3HS7X@3699|Brassicales	35493|Streptophyta	O	Belongs to the ubiquitin-conjugating enzyme family	UBC23	GO:0003674,GO:0003824,GO:0004842,GO:0005488,GO:0005515,GO:0005575,GO:0005622,GO:0005623,GO:0005737,GO:0005829,GO:0006464,GO:0006807,GO:0008150,GO:0008152,GO:0009987,GO:0016567,GO:0016740,GO:0019538,GO:0019787,GO:0019899,GO:0031625,GO:0032446,GO:0036211,GO:0043170,GO:0043412,GO:0044237,GO:0044238,GO:0044260,GO:0044267,GO:0044389,GO:0044424,GO:0044444,GO:0044464,GO:0061630,GO:0061659,GO:0070647,GO:…	2.3.2.24	ko:K10581	ko04120,map04120	-	-	-	ko00000,ko00001,ko01000,ko04121	-	-	-	UQ_con	2
481	scaffold216200:23252-23710_0	3649.evm.model.supercontig_44.37	1.32e-38	139	COG5059@1|root,KOG0243@2759|Eukaryota,37PAD@33090|Viridiplantae,3GF3D@35493|Streptophyta,3HPNT@3699|Brassicales	35493|Streptophyta	Z	Belongs to the TRAFAC class myosin-kinesin ATPase superfamily. Kinesin family	-	GO:0003674,GO:0003774,GO:0003777,GO:0003824,GO:0005488,GO:0005515,GO:0005575,GO:0005622,GO:0005623,GO:0005737,GO:0005856,GO:0005871,GO:0005875,GO:0006810,GO:0006928,GO:0007017,GO:0007018,GO:0008017,GO:0008092,GO:0008150,GO:0008574,GO:0009524,GO:0009987,GO:0010970,GO:0015630,GO:0015631,GO:0016462,GO:0016787,GO:0016817,GO:0016818,GO:0016887,GO:0017111,GO:0030705,GO:0032991,GO:0042623,GO:0043226,GO:…	-	ko:K10398	-	-	-	-	ko00000,ko03036,ko04812	-	-	-	Kinesin	2
482	scaffold216200:25695-25805_0	88036.EFJ09660	4.51e-14	66.6	COG5059@1|root,KOG0243@2759|Eukaryota,37PAD@33090|Viridiplantae,3GF3D@35493|Streptophyta	35493|Streptophyta	Z	Belongs to the TRAFAC class myosin-kinesin ATPase superfamily. Kinesin family	-	GO:0003674,GO:0003774,GO:0003777,GO:0003824,GO:0005488,GO:0005515,GO:0005575,GO:0005622,GO:0005623,GO:0005737,GO:0005856,GO:0005871,GO:0005875,GO:0006810,GO:0006928,GO:0007017,GO:0007018,GO:0008017,GO:0008092,GO:0008150,GO:0008574,GO:0009524,GO:0009987,GO:0010970,GO:0015630,GO:0015631,GO:0016462,GO:0016787,GO:0016817,GO:0016818,GO:0016887,GO:0017111,GO:0030705,GO:0032991,GO:0042623,GO:0043226,GO:…	-	ko:K10396,ko:K10398	ko04144,ko04728,map04144,map04728	-	-	-	ko00000,ko00001,ko03036,ko04131,ko04147,ko04812	-	-	-	Kinesin	2
483	scaffold216200:25881-28652_0	4081.Solyc09g090320.1.1	2.02e-23	115	COG5059@1|root,KOG0243@2759|Eukaryota,37PAD@33090|Viridiplantae,3GF3D@35493|Streptophyta,44HPE@71274|asterids	35493|Streptophyta	Z	Belongs to the TRAFAC class myosin-kinesin ATPase superfamily. Kinesin family	-	GO:0003674,GO:0003774,GO:0003777,GO:0003824,GO:0005488,GO:0005515,GO:0005575,GO:0005622,GO:0005623,GO:0005737,GO:0005856,GO:0005871,GO:0005875,GO:0006810,GO:0006928,GO:0007017,GO:0007018,GO:0008017,GO:0008092,GO:0008150,GO:0008574,GO:0009524,GO:0009987,GO:0010970,GO:0015630,GO:0015631,GO:0016462,GO:0016787,GO:0016817,GO:0016818,GO:0016887,GO:0017111,GO:0030705,GO:0032991,GO:0042623,GO:0043226,GO:…	-	ko:K10398	-	-	-	-	ko00000,ko03036,ko04812	-	-	-	Kinesin	2
484	scaffold216300:25778-25997_0	4565.Traes_3AL_89DA6721C.1	8.22e-26	102	COG0470@1|root,KOG0989@2759|Eukaryota,37S10@33090|Viridiplantae,3GCRI@35493|Streptophyta,3KPGA@4447|Liliopsida,3I8CG@38820|Poales	35493|Streptophyta	L	DNA polymerase III subunits gamma and tau domain III	-	GO:0005575,GO:0005622,GO:0005623,GO:0005634,GO:0005657,GO:0005663,GO:0005694,GO:0005886,GO:0006139,GO:0006259,GO:0006260,GO:0006261,GO:0006281,GO:0006725,GO:0006807,GO:0006950,GO:0006974,GO:0008150,GO:0008152,GO:0009058,GO:0009059,GO:0009987,GO:0016020,GO:0032991,GO:0033554,GO:0034641,GO:0034645,GO:0043170,GO:0043226,GO:0043227,GO:0043228,GO:0043229,GO:0043231,GO:0043232,GO:0044237,GO:0044238,GO:…	-	-	-	-	-	-	-	-	-	-	DNA_pol3_delta2,DNA_pol3_gamma3	2
485	scaffold216327:41278-41660_0	4565.Traes_5BL_EE139361F.1	3.39e-54	175	KOG2369@1|root,KOG2369@2759|Eukaryota,37QFQ@33090|Viridiplantae,3G95G@35493|Streptophyta,3KQIM@4447|Liliopsida,3I7G1@38820|Poales	35493|Streptophyta	I	Lecithin:cholesterol acyltransferase	-	GO:0003674,GO:0003824,GO:0005575,GO:0005622,GO:0005623,GO:0005737,GO:0005773,GO:0005783,GO:0006629,GO:0006638,GO:0006639,GO:0006641,GO:0008080,GO:0008150,GO:0008152,GO:0008610,GO:0009058,GO:0009987,GO:0012505,GO:0016407,GO:0016410,GO:0016740,GO:0016746,GO:0016747,GO:0019432,GO:0043226,GO:0043227,GO:0043229,GO:0043231,GO:0044237,GO:0044238,GO:0044249,GO:0044255,GO:0044424,GO:0044444,GO:0044464,GO:…	2.3.1.158	ko:K00679	ko00561,map00561	-	R05333	RC00037,RC00041	ko00000,ko00001,ko01000	-	-	-	LCAT	2
486	scaffold217225:76423-77967_0	3750.XP_008389362.1	2.5e-179	529	KOG4197@1|root,KOG4197@2759|Eukaryota,37KH2@33090|Viridiplantae,3GE7J@35493|Streptophyta,4JMI1@91835|fabids	35493|Streptophyta	S	Pentatricopeptide repeat-containing protein	-	GO:0003674,GO:0003676,GO:0003723,GO:0003824,GO:0004518,GO:0004519,GO:0005488,GO:0005575,GO:0005622,GO:0005623,GO:0006139,GO:0006725,GO:0006807,GO:0008150,GO:0008152,GO:0009451,GO:0009987,GO:0016070,GO:0016787,GO:0016788,GO:0034641,GO:0043170,GO:0043226,GO:0043227,GO:0043229,GO:0043231,GO:0043412,GO:0044237,GO:0044238,GO:0044424,GO:0044464,GO:0046483,GO:0071704,GO:0090304,GO:0090305,GO:0097159,GO:…	-	-	-	-	-	-	-	-	-	-	DYW_deaminase,PPR,PPR_2	2
487	scaffold217225:77875-78110_0	13333.ERM98981	6.44e-18	79	KOG4197@1|root,KOG4197@2759|Eukaryota,37RUG@33090|Viridiplantae,3GFNQ@35493|Streptophyta	35493|Streptophyta	S	Pentatricopeptide repeat-containing protein	-	-	-	-	-	-	-	-	-	-	-	-	DUF2985,DYW_deaminase,PLAC8,PPR,PPR_2	2
488	scaffold217480:22527-22706_0	4096.XP_009772858.1	2.62e-17	78.2	28NHN@1|root,2QV36@2759|Eukaryota,37K79@33090|Viridiplantae,3G7JZ@35493|Streptophyta,44S0R@71274|asterids	35493|Streptophyta	S	LOB domain-containing protein	-	-	-	-	-	-	-	-	-	-	-	-	LOB	2
489	scaffold217480:23709-24047_0	4098.XP_009611728.1	1.35e-20	89.4	28NHN@1|root,2QV36@2759|Eukaryota,37K79@33090|Viridiplantae,3G7JZ@35493|Streptophyta,44P27@71274|asterids	35493|Streptophyta	S	LOB domain-containing protein	-	-	-	-	-	-	-	-	-	-	-	-	LOB	2
490	scaffold218163:36692-37729_0	3694.POPTR_0006s26010.1	8.5e-54	189	28I7F@1|root,2QQHP@2759|Eukaryota,37NNX@33090|Viridiplantae,3G8ZG@35493|Streptophyta,4JK5B@91835|fabids	35493|Streptophyta	S	Dehydration-responsive protein	-	GO:0005575,GO:0005622,GO:0005623,GO:0005737,GO:0005768,GO:0005794,GO:0005802,GO:0006950,GO:0006970,GO:0008150,GO:0009628,GO:0009651,GO:0012505,GO:0031410,GO:0031982,GO:0031984,GO:0043226,GO:0043227,GO:0043229,GO:0043231,GO:0044422,GO:0044424,GO:0044431,GO:0044444,GO:0044446,GO:0044464,GO:0050896,GO:0097708,GO:0098791	-	-	-	-	-	-	-	-	-	-	BURP	2
491	scaffold218163:36692-37771_0	3694.POPTR_0006s26010.1	1.21e-58	202	28I7F@1|root,2QQHP@2759|Eukaryota,37NNX@33090|Viridiplantae,3G8ZG@35493|Streptophyta,4JK5B@91835|fabids	35493|Streptophyta	S	Dehydration-responsive protein	-	GO:0005575,GO:0005622,GO:0005623,GO:0005737,GO:0005768,GO:0005794,GO:0005802,GO:0006950,GO:0006970,GO:0008150,GO:0009628,GO:0009651,GO:0012505,GO:0031410,GO:0031982,GO:0031984,GO:0043226,GO:0043227,GO:0043229,GO:0043231,GO:0044422,GO:0044424,GO:0044431,GO:0044444,GO:0044446,GO:0044464,GO:0050896,GO:0097708,GO:0098791	-	-	-	-	-	-	-	-	-	-	BURP	2
492	scaffold218286:54219-57111_0	29730.Gorai.007G288400.1	2.21e-252	745	KOG4197@1|root,KOG4197@2759|Eukaryota,37KUJ@33090|Viridiplantae,3G9E6@35493|Streptophyta	35493|Streptophyta	IQ	Pentatricopeptide repeat-containing protein	-	GO:0003674,GO:0003676,GO:0003723,GO:0003824,GO:0004518,GO:0004519,GO:0005488,GO:0005575,GO:0005622,GO:0005623,GO:0006139,GO:0006725,GO:0006807,GO:0008150,GO:0008152,GO:0009451,GO:0009987,GO:0016070,GO:0016787,GO:0016788,GO:0034641,GO:0043170,GO:0043226,GO:0043227,GO:0043229,GO:0043231,GO:0043412,GO:0044237,GO:0044238,GO:0044424,GO:0044464,GO:0046483,GO:0071704,GO:0090304,GO:0090305,GO:0097159,GO:…	-	-	-	-	-	-	-	-	-	-	DYW_deaminase,PPR,PPR_2,PPR_3	2
493	scaffold218490:35258-36758_0	13333.ERN18270	6.68e-87	299	KOG4308@1|root,KOG4308@2759|Eukaryota,37S3A@33090|Viridiplantae,3G886@35493|Streptophyta	35493|Streptophyta	S	Tornado 1	-	GO:0003002,GO:0006810,GO:0007275,GO:0007389,GO:0008150,GO:0009653,GO:0009825,GO:0009888,GO:0009914,GO:0009926,GO:0009933,GO:0009956,GO:0009965,GO:0009987,GO:0010016,GO:0010051,GO:0010305,GO:0010540,GO:0010817,GO:0016049,GO:0032501,GO:0032502,GO:0040007,GO:0048366,GO:0048367,GO:0048507,GO:0048532,GO:0048731,GO:0048827,GO:0048856,GO:0051179,GO:0051234,GO:0060918,GO:0065007,GO:0065008,GO:0099402,GO:…	-	-	-	-	-	-	-	-	-	-	COR,LRR_6,Roc	2
494	scaffold218490:37147-38390_0	102107.XP_008227100.1	9.52e-178	539	KOG4308@1|root,KOG4308@2759|Eukaryota,37S3A@33090|Viridiplantae,3G886@35493|Streptophyta,4JIU3@91835|fabids	35493|Streptophyta	S	Tornado 1	-	GO:0003002,GO:0006810,GO:0007275,GO:0007389,GO:0008150,GO:0009653,GO:0009825,GO:0009888,GO:0009914,GO:0009926,GO:0009933,GO:0009956,GO:0009965,GO:0009987,GO:0010016,GO:0010051,GO:0010305,GO:0010540,GO:0010817,GO:0016049,GO:0032501,GO:0032502,GO:0040007,GO:0048366,GO:0048367,GO:0048507,GO:0048532,GO:0048731,GO:0048827,GO:0048856,GO:0051179,GO:0051234,GO:0060918,GO:0065007,GO:0065008,GO:0099402,GO:…	-	-	-	-	-	-	-	-	-	-	COR,LRR_6,Roc	2
495	scaffold218631:128887-129738_0	3847.GLYMA17G08030.1	2.04e-68	233	KOG0401@1|root,KOG0401@2759|Eukaryota,37J2C@33090|Viridiplantae,3G9XZ@35493|Streptophyta,4JGDJ@91835|fabids	35493|Streptophyta	J	eukaryotic translation initiation factor isoform	-	-	-	ko:K03260	ko03013,ko05416,map03013,map05416	M00428	-	-	ko00000,ko00001,ko00002,ko03012,ko03019	-	-	-	MA3,MIF4G	2
496	scaffold220229:273439-273866_0	13333.ERM99055	3.33e-25	100	COG0484@1|root,KOG0714@2759|Eukaryota,37UNY@33090|Viridiplantae,3GJ62@35493|Streptophyta	35493|Streptophyta	O	Chaperone protein DNAj	-	-	-	-	-	-	-	-	-	-	-	-	DnaJ	2
497	scaffold221433:20362-21272_0	218851.Aquca_020_00286.1	4.37e-115	350	COG0277@1|root,KOG4730@2759|Eukaryota,37RV9@33090|Viridiplantae,3GBCI@35493|Streptophyta	35493|Streptophyta	V	L-gulonolactone oxidase activity	-	GO:0000166,GO:0003674,GO:0003824,GO:0005488,GO:0005975,GO:0005996,GO:0006082,GO:0006732,GO:0006766,GO:0006767,GO:0008150,GO:0008152,GO:0009058,GO:0009108,GO:0009110,GO:0009987,GO:0016051,GO:0016053,GO:0016491,GO:0016614,GO:0016899,GO:0019752,GO:0019852,GO:0019853,GO:0036094,GO:0042364,GO:0043167,GO:0043168,GO:0043436,GO:0044237,GO:0044238,GO:0044249,GO:0044281,GO:0044283,GO:0046364,GO:0046394,GO:…	-	-	-	-	-	-	-	-	-	-	ALO,FAD_binding_4	2
498	scaffold221433:21362-21617_0	4513.MLOC_66489.1	4.65e-28	110	COG0277@1|root,KOG4730@2759|Eukaryota,37RV9@33090|Viridiplantae,3GBCI@35493|Streptophyta,3KPU1@4447|Liliopsida,3I3DT@38820|Poales	35493|Streptophyta	V	D-arabinono-1,4-lactone oxidase	-	GO:0000166,GO:0003674,GO:0003824,GO:0005488,GO:0005975,GO:0005996,GO:0006082,GO:0006732,GO:0006766,GO:0006767,GO:0008150,GO:0008152,GO:0009058,GO:0009108,GO:0009110,GO:0009987,GO:0016051,GO:0016053,GO:0016491,GO:0016614,GO:0016899,GO:0019752,GO:0019852,GO:0019853,GO:0036094,GO:0042364,GO:0043167,GO:0043168,GO:0043436,GO:0044237,GO:0044238,GO:0044249,GO:0044281,GO:0044283,GO:0046364,GO:0046394,GO:…	-	-	-	-	-	-	-	-	-	-	ALO,FAD_binding_4	2
499	scaffold221433:21708-22397_0	3983.cassava4.1_004293m	4.28e-78	252	COG0277@1|root,KOG4730@2759|Eukaryota,37RV9@33090|Viridiplantae,3GBCI@35493|Streptophyta,4JSRS@91835|fabids	35493|Streptophyta	V	D-arabinono-1,4-lactone oxidase	-	GO:0000166,GO:0003674,GO:0003824,GO:0005488,GO:0005975,GO:0005996,GO:0006082,GO:0006732,GO:0006766,GO:0006767,GO:0008150,GO:0008152,GO:0009058,GO:0009108,GO:0009110,GO:0009987,GO:0016051,GO:0016053,GO:0016491,GO:0016614,GO:0016899,GO:0019752,GO:0019852,GO:0019853,GO:0036094,GO:0042364,GO:0043167,GO:0043168,GO:0043436,GO:0044237,GO:0044238,GO:0044249,GO:0044281,GO:0044283,GO:0046364,GO:0046394,GO:…	-	-	-	-	-	-	-	-	-	-	ALO,FAD_binding_4	2
500	scaffold222100:3625-3789_0	3218.PP1S54_231V6.1	3.06e-17	74.7	KOG0583@1|root,KOG0583@2759|Eukaryota	2759|Eukaryota	G	protein serine/threonine kinase activity	CIPK01	-	2.7.11.11	ko:K07198	ko04068,ko04140,ko04150,ko04151,ko04152,ko04211,ko04213,ko04371,ko04530,ko04710,ko04714,ko04910,ko04920,ko04921,ko04922,ko04931,ko04932,ko05410,ko05418,map04068,map04140,map04150,map04151,map04152,map04211,map04213,map04371,map04530,map04710,map04714,map04910,map04920,map04921,map04922,map04931,map04932,map05410,map05418	-	-	-	ko00000,ko00001,ko01000,ko01001,ko03029,ko04131	-	-	-	NAF,Pkinase	2
501	scaffold222100:4213-4320_0	4565.Traes_3DL_0B56AE424.1	2.68e-11	60.1	KOG0583@1|root,KOG0583@2759|Eukaryota,37I6U@33090|Viridiplantae,3GAMQ@35493|Streptophyta,3KWGM@4447|Liliopsida,3I4Y6@38820|Poales	35493|Streptophyta	T	Non-specific serine threonine protein kinase	-	GO:0003674,GO:0003824,GO:0004672,GO:0004674,GO:0005575,GO:0005622,GO:0005623,GO:0005634,GO:0005737,GO:0006464,GO:0006468,GO:0006793,GO:0006796,GO:0006807,GO:0007154,GO:0007165,GO:0008150,GO:0008152,GO:0009987,GO:0016301,GO:0016310,GO:0016740,GO:0016772,GO:0016773,GO:0019538,GO:0023052,GO:0035556,GO:0036211,GO:0043170,GO:0043226,GO:0043227,GO:0043229,GO:0043231,GO:0043412,GO:0044237,GO:0044238,GO:…	2.7.11.11	ko:K07198	ko04068,ko04140,ko04150,ko04151,ko04152,ko04211,ko04213,ko04371,ko04530,ko04710,ko04714,ko04910,ko04920,ko04921,ko04922,ko04931,ko04932,ko05410,ko05418,map04068,map04140,map04150,map04151,map04152,map04211,map04213,map04371,map04530,map04710,map04714,map04910,map04920,map04921,map04922,map04931,map04932,map05410,map05418	-	-	-	ko00000,ko00001,ko01000,ko01001,ko03029,ko04131	-	-	-	NAF,Pkinase	2
502	scaffold222100:4722-4847_0	4565.Traes_3AL_B564C0BE6.1	5.37e-15	68.9	KOG0583@1|root,KOG0583@2759|Eukaryota,37HJQ@33090|Viridiplantae,3GDBQ@35493|Streptophyta,3KQBM@4447|Liliopsida,3IAE2@38820|Poales	35493|Streptophyta	T	Non-specific serine threonine protein kinase	-	GO:0003674,GO:0003824,GO:0004672,GO:0004674,GO:0005575,GO:0005622,GO:0005623,GO:0006464,GO:0006468,GO:0006793,GO:0006796,GO:0006807,GO:0007154,GO:0007165,GO:0008150,GO:0008152,GO:0009987,GO:0016301,GO:0016310,GO:0016740,GO:0016772,GO:0016773,GO:0018105,GO:0018107,GO:0018193,GO:0018209,GO:0018210,GO:0019538,GO:0023052,GO:0035556,GO:0036211,GO:0043170,GO:0043412,GO:0044237,GO:0044238,GO:0044260,GO:…	2.7.11.11	ko:K07198	ko04068,ko04140,ko04150,ko04151,ko04152,ko04211,ko04213,ko04371,ko04530,ko04710,ko04714,ko04910,ko04920,ko04921,ko04922,ko04931,ko04932,ko05410,ko05418,map04068,map04140,map04150,map04151,map04152,map04211,map04213,map04371,map04530,map04710,map04714,map04910,map04920,map04921,map04922,map04931,map04932,map05410,map05418	-	-	-	ko00000,ko00001,ko01000,ko01001,ko03029,ko04131	-	-	-	NAF,Pkinase	2
503	scaffold222145:177690-178496_0	13333.ERN10236	1.34e-66	214	2CNFD@1|root,2QVVS@2759|Eukaryota,37NN6@33090|Viridiplantae,3G73E@35493|Streptophyta	35493|Streptophyta	S	YLS9-like	-	-	-	-	-	-	-	-	-	-	-	-	LEA_2	2
504	scaffold222462:18612-19766_0	13333.ERN09455	4.65e-194	548	28KAQ@1|root,2QSRH@2759|Eukaryota,37N2A@33090|Viridiplantae,3G76Z@35493|Streptophyta	35493|Streptophyta	S	3-oxo-Delta(4,5)-steroid 5-beta-reductase-like	-	GO:0003002,GO:0003674,GO:0003824,GO:0005575,GO:0005622,GO:0005623,GO:0005737,GO:0005829,GO:0006629,GO:0006950,GO:0007275,GO:0007389,GO:0008150,GO:0008152,GO:0008202,GO:0009611,GO:0010051,GO:0016491,GO:0016627,GO:0016628,GO:0032501,GO:0032502,GO:0035671,GO:0044238,GO:0044424,GO:0044444,GO:0044464,GO:0048856,GO:0050896,GO:0055114,GO:0071704,GO:1901360	1.3.1.3	ko:K22419	-	-	-	-	ko00000,ko01000	-	-	-	Epimerase	2
505	scaffold223541:41388-41918_0	13333.ERN05552	6.92e-14	72.4	2BZY5@1|root,2S3AQ@2759|Eukaryota,37VQP@33090|Viridiplantae,3GJJU@35493|Streptophyta	35493|Streptophyta	-	-	-	-	-	-	-	-	-	-	-	-	-	-	-	2
506	scaffold223839:74624-76054_0	42345.XP_008810187.1	1.64e-166	486	COG2124@1|root,KOG0157@2759|Eukaryota,37IEK@33090|Viridiplantae,3G7DA@35493|Streptophyta,3KREI@4447|Liliopsida	35493|Streptophyta	Q	Belongs to the cytochrome P450 family	-	-	-	-	-	-	-	-	-	-	-	-	p450	2
507	scaffold22475:127122-127427_0	4006.Lus10028769	4.63e-40	139	KOG2246@1|root,KOG2246@2759|Eukaryota,37QNU@33090|Viridiplantae,3GBGY@35493|Streptophyta,4JG1I@91835|fabids	35493|Streptophyta	G	Protein of unknown function, DUF604	-	-	-	-	-	-	-	-	-	-	-	-	DUF604	2
508	scaffold22475:127518-127664_0	3885.XP_007158520.1	1.11e-19	84.3	KOG2246@1|root,KOG2246@2759|Eukaryota,37QNU@33090|Viridiplantae,3GBGY@35493|Streptophyta,4JG1I@91835|fabids	35493|Streptophyta	G	Protein of unknown function, DUF604	-	-	-	-	-	-	-	-	-	-	-	-	DUF604	2
509	scaffold22475:128585-129481_0	13333.ERM96449	6.72e-112	340	KOG2246@1|root,KOG2246@2759|Eukaryota,37QNU@33090|Viridiplantae,3GBGY@35493|Streptophyta	35493|Streptophyta	G	Glycosyltransferase-like protein	-	-	-	-	-	-	-	-	-	-	-	-	DUF604	2
510	scaffold225632:51991-52328_0	3750.XP_008360996.1	3.51e-32	117	2CMPM@1|root,2QR80@2759|Eukaryota,37PYK@33090|Viridiplantae,3G8VB@35493|Streptophyta	35493|Streptophyta	S	Indole-3-acetic acid-amido synthetase	GH3.4	GO:0003674,GO:0003824,GO:0008150,GO:0009314,GO:0009416,GO:0009628,GO:0009719,GO:0009725,GO:0009733,GO:0010033,GO:0010252,GO:0010279,GO:0016874,GO:0016879,GO:0016881,GO:0042221,GO:0042592,GO:0048878,GO:0050896,GO:0065007,GO:0065008	-	ko:K14487	ko04075,map04075	-	-	-	ko00000,ko00001	-	-	-	GH3	2
511	scaffold225632:52500-52601_0	3750.XP_008360996.1	8.19e-12	61.6	2CMPM@1|root,2QR80@2759|Eukaryota,37PYK@33090|Viridiplantae,3G8VB@35493|Streptophyta	35493|Streptophyta	S	Indole-3-acetic acid-amido synthetase	GH3.4	GO:0003674,GO:0003824,GO:0008150,GO:0009314,GO:0009416,GO:0009628,GO:0009719,GO:0009725,GO:0009733,GO:0010033,GO:0010252,GO:0010279,GO:0016874,GO:0016879,GO:0016881,GO:0042221,GO:0042592,GO:0048878,GO:0050896,GO:0065007,GO:0065008	-	ko:K14487	ko04075,map04075	-	-	-	ko00000,ko00001	-	-	-	GH3	2
512	scaffold225632:52748-53568_0	29730.Gorai.005G234200.1	3.35e-139	411	2CMPM@1|root,2QR80@2759|Eukaryota,37PYK@33090|Viridiplantae,3G8VB@35493|Streptophyta	35493|Streptophyta	S	Indole-3-acetic acid-amido synthetase	-	GO:0008150,GO:0009314,GO:0009416,GO:0009628,GO:0009719,GO:0009725,GO:0009733,GO:0010033,GO:0042221,GO:0050896	-	ko:K14487	ko04075,map04075	-	-	-	ko00000,ko00001	-	-	-	GH3	2
513	scaffold225632:54198-54784_0	3649.evm.TU.contig_32826.1	2.23e-103	313	2CMGQ@1|root,2QQAN@2759|Eukaryota,37HGY@33090|Viridiplantae,3GXAI@35493|Streptophyta,3HMD8@3699|Brassicales	35493|Streptophyta	S	Indole-3-acetic acid-amido synthetase	-	GO:0000902,GO:0003674,GO:0003824,GO:0005575,GO:0005622,GO:0005623,GO:0005737,GO:0006725,GO:0006790,GO:0006807,GO:0007154,GO:0007165,GO:0008150,GO:0008152,GO:0009058,GO:0009314,GO:0009403,GO:0009404,GO:0009416,GO:0009507,GO:0009536,GO:0009628,GO:0009653,GO:0009700,GO:0009719,GO:0009725,GO:0009733,GO:0009734,GO:0009755,GO:0009826,GO:0009889,GO:0009891,GO:0009893,GO:0009987,GO:0010033,GO:0010120,GO:…	-	ko:K14487	ko04075,map04075	-	-	-	ko00000,ko00001	-	-	-	GH3	2
514	scaffold226617:38440-38868_0	3750.XP_008383739.1	9.93e-29	114	28JFJ@1|root,2QRUR@2759|Eukaryota,37IIG@33090|Viridiplantae,3GFW6@35493|Streptophyta,4JGGV@91835|fabids	35493|Streptophyta	S	Clavaminate synthase-like protein	-	GO:0005575,GO:0005622,GO:0005623,GO:0005634,GO:0043226,GO:0043227,GO:0043229,GO:0043231,GO:0044424,GO:0044464	-	-	-	-	-	-	-	-	-	-	TauD	2
515	scaffold226617:39390-39640_0	225117.XP_009342539.1	7.84e-22	93.6	28JFJ@1|root,2QRUR@2759|Eukaryota,37IIG@33090|Viridiplantae,3GFW6@35493|Streptophyta,4JGGV@91835|fabids	35493|Streptophyta	S	Clavaminate synthase-like protein	-	GO:0005575,GO:0005622,GO:0005623,GO:0005634,GO:0043226,GO:0043227,GO:0043229,GO:0043231,GO:0044424,GO:0044464	-	-	-	-	-	-	-	-	-	-	TauD	2
516	scaffold226617:40080-40425_0	13333.ERN19967	3.93e-23	98.6	2D2PB@1|root,2SNHI@2759|Eukaryota,37ZJK@33090|Viridiplantae,3GPEM@35493|Streptophyta	35493|Streptophyta	S	Taurine catabolism dioxygenase TauD, TfdA family	-	-	-	-	-	-	-	-	-	-	-	-	TauD	2
517	scaffold227205:34825-35142_0	4538.ORGLA03G0236300.1	6.13e-39	140	KOG2736@1|root,KOG2736@2759|Eukaryota,37JEM@33090|Viridiplantae,3G7TN@35493|Streptophyta,3KY8G@4447|Liliopsida,3IF1E@38820|Poales	35493|Streptophyta	T	subunit of the gamma-secretase complex, an endoprotease complex that catalyzes the intramembrane cleavage of integral membrane proteins such as Notch receptors	-	GO:0003674,GO:0003824,GO:0004175,GO:0005575,GO:0005622,GO:0005623,GO:0005634,GO:0005737,GO:0005798,GO:0005886,GO:0005887,GO:0006508,GO:0006807,GO:0008150,GO:0008152,GO:0008233,GO:0016020,GO:0016021,GO:0016787,GO:0019538,GO:0031224,GO:0031226,GO:0031410,GO:0031982,GO:0043170,GO:0043226,GO:0043227,GO:0043229,GO:0043231,GO:0044238,GO:0044424,GO:0044425,GO:0044444,GO:0044459,GO:0044464,GO:0070011,GO:…	-	ko:K04505	ko04310,ko04330,ko04722,ko05010,ko05165,map04310,map04330,map04722,map05010,map05165	M00682	-	-	ko00000,ko00001,ko00002,ko01000,ko01002	-	-	-	Presenilin	2
518	scaffold22757:37096-37640_0	28532.XP_010544125.1	2.36e-79	242	2BYKQ@1|root,2QQ4A@2759|Eukaryota,37KIT@33090|Viridiplantae,3GCHI@35493|Streptophyta,3HZKY@3699|Brassicales	35493|Streptophyta	S	germin-like protein	-	GO:0005575,GO:0005618,GO:0005622,GO:0005623,GO:0005634,GO:0005911,GO:0006810,GO:0006950,GO:0008150,GO:0009266,GO:0009409,GO:0009506,GO:0009628,GO:0009987,GO:0010496,GO:0010497,GO:0030054,GO:0030312,GO:0043226,GO:0043227,GO:0043229,GO:0043231,GO:0044424,GO:0044464,GO:0050789,GO:0050793,GO:0050896,GO:0051179,GO:0051234,GO:0051239,GO:0055044,GO:0065007,GO:0071944,GO:2000026,GO:2000280	-	-	-	-	-	-	-	-	-	-	Cupin_1	2
519	scaffold227617:4325-4667_0	13333.ERM98940	1.26e-36	135	28K4X@1|root,2QSSZ@2759|Eukaryota,37KF3@33090|Viridiplantae,3G8BK@35493|Streptophyta	35493|Streptophyta	S	Protein trichome birefringence-like	-	GO:0003674,GO:0003824,GO:0005575,GO:0005622,GO:0005623,GO:0005737,GO:0005794,GO:0008150,GO:0008374,GO:0009987,GO:0012505,GO:0016407,GO:0016413,GO:0016740,GO:0016746,GO:0016747,GO:0043226,GO:0043227,GO:0043229,GO:0043231,GO:0044424,GO:0044444,GO:0044464,GO:0071554	-	-	-	-	-	-	-	-	-	-	PC-Esterase,PMR5N	2
520	scaffold227617:5159-5548_0	4641.GSMUA_Achr9P18580_001	2.3e-66	207	28K4X@1|root,2QPPC@2759|Eukaryota,37KE6@33090|Viridiplantae,3GC6G@35493|Streptophyta,3KUF7@4447|Liliopsida	35493|Streptophyta	S	GDSL/SGNH-like Acyl-Esterase family found in Pmr5 and Cas1p	-	GO:0003674,GO:0003824,GO:0005575,GO:0005622,GO:0005623,GO:0005737,GO:0005794,GO:0007623,GO:0008150,GO:0008374,GO:0009987,GO:0012505,GO:0016407,GO:0016413,GO:0016740,GO:0016746,GO:0016747,GO:0043226,GO:0043227,GO:0043229,GO:0043231,GO:0044424,GO:0044444,GO:0044464,GO:0048511,GO:0071554	-	-	-	-	-	-	-	-	-	-	PC-Esterase,PMR5N	2
521	scaffold227617:7187-7758_0	4565.Traes_1AS_E64B6DC08.1	2.14e-30	117	28K4X@1|root,2QPPC@2759|Eukaryota,37KE6@33090|Viridiplantae,3GC6G@35493|Streptophyta,3KUF7@4447|Liliopsida,3I3X0@38820|Poales	35493|Streptophyta	S	GDSL/SGNH-like Acyl-Esterase family found in Pmr5 and Cas1p	-	GO:0003674,GO:0003824,GO:0005575,GO:0005622,GO:0005623,GO:0005737,GO:0005794,GO:0007623,GO:0008150,GO:0008374,GO:0009987,GO:0012505,GO:0016407,GO:0016413,GO:0016740,GO:0016746,GO:0016747,GO:0043226,GO:0043227,GO:0043229,GO:0043231,GO:0044424,GO:0044444,GO:0044464,GO:0048511,GO:0071554	-	-	-	-	-	-	-	-	-	-	PC-Esterase,PMR5N	2
522	scaffold227767:53280-54761_0	88036.EFJ11435	2.94e-51	182	KOG1192@1|root,KOG1192@2759|Eukaryota,37M0D@33090|Viridiplantae,3GDZJ@35493|Streptophyta	35493|Streptophyta	CG	Belongs to the UDP-glycosyltransferase family	-	-	2.4.1.218	ko:K08237	-	-	-	-	ko00000,ko01000,ko01003	-	GT1	-	UDPGT	2
523	scaffold227767:53322-54761_0	88036.EFJ11435	8.36e-51	181	KOG1192@1|root,KOG1192@2759|Eukaryota,37M0D@33090|Viridiplantae,3GDZJ@35493|Streptophyta	35493|Streptophyta	CG	Belongs to the UDP-glycosyltransferase family	-	-	2.4.1.218	ko:K08237	-	-	-	-	ko00000,ko01000,ko01003	-	GT1	-	UDPGT	2
524	scaffold227876:22620-26581_0	13333.ERN06243	1.98e-194	624	2CNQM@1|root,2QXH2@2759|Eukaryota,37RKB@33090|Viridiplantae,3GGV5@35493|Streptophyta	35493|Streptophyta	-	-	-	-	-	ko:K17592	-	-	-	-	ko00000,ko01009	-	-	-	-	2
525	scaffold227876:27591-27801_0	3750.XP_008377936.1	9.22e-29	106	28J2T@1|root,2QREY@2759|Eukaryota,37TGG@33090|Viridiplantae,3GHTN@35493|Streptophyta	3750.XP_008377936.1|-	-	-	-	-	-	-	-	-	-	-	-	-	-	-	-	2
526	scaffold227876:27946-28104_0	3827.XP_004517247.1	4.09e-21	88.6	2CNQM@1|root,2QXH2@2759|Eukaryota,37RKB@33090|Viridiplantae,3GGV5@35493|Streptophyta	35493|Streptophyta	-	-	-	-	-	ko:K17592	-	-	-	-	ko00000,ko01009	-	-	-	-	2
527	scaffold227884:34573-36423_0	4432.XP_010243924.1	1.17e-157	479	KOG4197@1|root,KOG4197@2759|Eukaryota,37K1H@33090|Viridiplantae,3GHBH@35493|Streptophyta	35493|Streptophyta	G	Pentatricopeptide repeat-containing protein	-	GO:0003674,GO:0003676,GO:0003723,GO:0003824,GO:0004518,GO:0004519,GO:0005488,GO:0005575,GO:0005622,GO:0005623,GO:0006139,GO:0006725,GO:0006807,GO:0008150,GO:0008152,GO:0009451,GO:0009987,GO:0016070,GO:0016787,GO:0016788,GO:0034641,GO:0043170,GO:0043226,GO:0043227,GO:0043229,GO:0043231,GO:0043412,GO:0044237,GO:0044238,GO:0044424,GO:0044464,GO:0046483,GO:0071704,GO:0090304,GO:0090305,GO:0097159,GO:…	-	-	-	-	-	-	-	-	-	-	PPR,PPR_2	2
528	scaffold228479:89746-89972_0	88036.EFJ30893	4.25e-22	93.2	KOG4197@1|root,KOG4197@2759|Eukaryota,37QBD@33090|Viridiplantae,3GC2C@35493|Streptophyta	35493|Streptophyta	S	Pentatricopeptide repeat-containing protein	-	GO:0003674,GO:0003676,GO:0003723,GO:0003824,GO:0004518,GO:0004519,GO:0005488,GO:0005575,GO:0005622,GO:0005623,GO:0005737,GO:0006139,GO:0006725,GO:0006807,GO:0008150,GO:0008152,GO:0009451,GO:0009507,GO:0009536,GO:0009987,GO:0016070,GO:0016787,GO:0016788,GO:0034641,GO:0043170,GO:0043226,GO:0043227,GO:0043229,GO:0043231,GO:0043412,GO:0044237,GO:0044238,GO:0044424,GO:0044444,GO:0044464,GO:0046483,GO:…	-	-	-	-	-	-	-	-	-	-	DYW_deaminase,PPR,PPR_2	2
529	scaffold228479:90083-91676_0	3649.evm.model.supercontig_28.46	4.23e-75	247	KOG4197@1|root,KOG4197@2759|Eukaryota,37RHI@33090|Viridiplantae,3GG45@35493|Streptophyta,3HQKK@3699|Brassicales	35493|Streptophyta	D	pentatricopeptide repeat-containing protein At3g49142	-	-	-	-	-	-	-	-	-	-	-	-	PPR	2
530	scaffold229255:68150-69257_0	3641.EOX92932	2.62e-190	542	2CMCP@1|root,2QPZ6@2759|Eukaryota,37MG6@33090|Viridiplantae,3GDWX@35493|Streptophyta	35493|Streptophyta	G	Belongs to the glycosyl hydrolase 17 family	-	GO:0001871,GO:0003674,GO:0003824,GO:0004553,GO:0005488,GO:0005575,GO:0005618,GO:0005622,GO:0005623,GO:0005737,GO:0005773,GO:0005886,GO:0005911,GO:0009505,GO:0009506,GO:0016020,GO:0016787,GO:0016798,GO:0030054,GO:0030246,GO:0030247,GO:0030312,GO:0031224,GO:0031225,GO:0031226,GO:0043226,GO:0043227,GO:0043229,GO:0043231,GO:0044424,GO:0044425,GO:0044444,GO:0044459,GO:0044464,GO:0046658,GO:0055044,GO:…	-	-	-	-	-	-	-	-	-	-	Glyco_hydro_17,X8	2
531	scaffold229289:11701-12206_0	3694.POPTR_0019s02990.1	5.85e-32	120	28I92@1|root,2QQJE@2759|Eukaryota,37M5G@33090|Viridiplantae,3GG0S@35493|Streptophyta	35493|Streptophyta	S	TMV resistance protein N-like	-	-	-	-	-	-	-	-	-	-	-	-	NB-ARC,TIR	2
532	scaffold229289:12303-13434_0	4432.XP_010255714.1	2.54e-78	270	2EF04@1|root,2SK9Z@2759|Eukaryota,37Z2C@33090|Viridiplantae,3GNBV@35493|Streptophyta	35493|Streptophyta	S	TIR domain	-	-	-	-	-	-	-	-	-	-	-	-	LRR_1,NB-ARC,TIR	2
533	scaffold229304:159385-160668_0	3641.EOY27495	3.54e-49	187	28NBG@1|root,2QUWY@2759|Eukaryota,37I9B@33090|Viridiplantae,3GDHR@35493|Streptophyta	35493|Streptophyta	S	E3 ubiquitin-protein ligase	-	-	-	-	-	-	-	-	-	-	-	-	-	2
534	scaffold229304:162281-162587_0	57918.XP_004295167.1	1.24e-09	60.8	KOG0167@1|root,KOG0167@2759|Eukaryota,37RY7@33090|Viridiplantae,3GH3F@35493|Streptophyta,4JKHW@91835|fabids	35493|Streptophyta	S	RING-type E3 ubiquitin transferase	-	-	-	-	-	-	-	-	-	-	-	-	U-box	2
535	scaffold229522:21585-22052_0	3750.XP_008349257.1	7.1e-13	72	KOG4658@1|root,KOG4658@2759|Eukaryota	2759|Eukaryota	S	ADP binding	-	GO:0002376,GO:0005575,GO:0005623,GO:0005886,GO:0006950,GO:0006952,GO:0006955,GO:0007154,GO:0007165,GO:0008150,GO:0008219,GO:0009626,GO:0009987,GO:0012501,GO:0016020,GO:0023052,GO:0033554,GO:0034050,GO:0044464,GO:0045087,GO:0050789,GO:0050794,GO:0050896,GO:0051716,GO:0065007,GO:0071944	4.1.3.27	ko:K01657	ko00400,ko00405,ko01100,ko01110,ko01130,ko01230,ko02024,ko02025,map00400,map00405,map01100,map01110,map01130,map01230,map02024,map02025	M00023	R00985,R00986	RC00010,RC02148,RC02414	ko00000,ko00001,ko00002,ko01000	-	-	-	NB-ARC	2
536	scaffold229788:113912-114628_0	4432.XP_010251957.1	1.14e-95	287	28JND@1|root,2QS1J@2759|Eukaryota,37VMZ@33090|Viridiplantae,3GJIX@35493|Streptophyta	35493|Streptophyta	I	Enoyl-CoA hydratase/isomerase	-	-	-	-	-	-	-	-	-	-	-	-	ECH_1	2
537	scaffold229788:113921-114628_0	4432.XP_010251957.1	1.44e-95	286	28JND@1|root,2QS1J@2759|Eukaryota,37VMZ@33090|Viridiplantae,3GJIX@35493|Streptophyta	35493|Streptophyta	I	Enoyl-CoA hydratase/isomerase	-	-	-	-	-	-	-	-	-	-	-	-	ECH_1	2
538	scaffold229788:113936-114628_0	4432.XP_010251957.1	6.44e-93	280	28JND@1|root,2QS1J@2759|Eukaryota,37VMZ@33090|Viridiplantae,3GJIX@35493|Streptophyta	35493|Streptophyta	I	Enoyl-CoA hydratase/isomerase	-	-	-	-	-	-	-	-	-	-	-	-	ECH_1	2
539	scaffold229931:35497-37347_0	13333.ERN06423	4.46e-135	407	28KVA@1|root,2QTBP@2759|Eukaryota,37KA7@33090|Viridiplantae,3GEUZ@35493|Streptophyta	35493|Streptophyta	S	Protein ROOT PRIMORDIUM DEFECTIVE	-	-	-	-	-	-	-	-	-	-	-	-	PORR	2
540	scaffold23075:304308-304661_0	42345.XP_008812302.1	6.85e-50	170	KOG2502@1|root,KOG2502@2759|Eukaryota,37J58@33090|Viridiplantae,3G7U4@35493|Streptophyta,3KXY2@4447|Liliopsida	35493|Streptophyta	S	Belongs to the TUB family	-	GO:0003674,GO:0005488,GO:0005543,GO:0008289,GO:0035091,GO:0043167,GO:0043168	-	-	-	-	-	-	-	-	-	-	F-box,Tub	2
541	scaffold24065:296573-296757_0	3750.XP_008365500.1	1.09e-20	86.3	COG1132@1|root,KOG0055@2759|Eukaryota,37S69@33090|Viridiplantae,3GFBI@35493|Streptophyta,4JJTP@91835|fabids	35493|Streptophyta	Q	ABC transporter B family member	-	GO:0005575,GO:0005623,GO:0005886,GO:0016020,GO:0044464,GO:0071944	3.6.3.44	ko:K05658	ko02010,ko04976,ko05206,ko05226,map02010,map04976,map05206,map05226	-	-	-	ko00000,ko00001,ko01000,ko02000,ko04090,ko04147	3.A.1.201	-	-	ABC_membrane,ABC_tran	2
542	scaffold24065:296953-297287_0	3641.EOY03302	1.38e-36	132	COG1132@1|root,KOG0055@2759|Eukaryota,37S69@33090|Viridiplantae,3GFBI@35493|Streptophyta	35493|Streptophyta	Q	ABC transporter B family member	-	GO:0005575,GO:0005623,GO:0005886,GO:0016020,GO:0044464,GO:0071944	3.6.3.44	ko:K05658	ko02010,ko04976,ko05206,ko05226,map02010,map04976,map05206,map05226	-	-	-	ko00000,ko00001,ko01000,ko02000,ko04090,ko04147	3.A.1.201	-	-	ABC_membrane,ABC_tran	2
543	scaffold24065:297406-297946_0	3880.AES74617	4.9e-82	258	COG1132@1|root,KOG0055@2759|Eukaryota,37S69@33090|Viridiplantae,3GFBI@35493|Streptophyta,4JJTP@91835|fabids	35493|Streptophyta	Q	ABC transporter B family member	-	GO:0005575,GO:0005623,GO:0005886,GO:0016020,GO:0044464,GO:0071944	3.6.3.44	ko:K05658	ko02010,ko04976,ko05206,ko05226,map02010,map04976,map05206,map05226	-	-	-	ko00000,ko00001,ko01000,ko02000,ko04090,ko04147	3.A.1.201	-	-	ABC_membrane,ABC_tran	2
544	scaffold24065:298028-298894_0	3649.evm.model.supercontig_14.71	1.51e-107	345	COG1132@1|root,KOG0055@2759|Eukaryota,37S69@33090|Viridiplantae,3GFBI@35493|Streptophyta,3HNPD@3699|Brassicales	35493|Streptophyta	Q	Contains the following InterPro domains ATPase, AAA type, core (InterPro IPR003593), ABC transporter-like (InterPro IPR003439), ABC transporter, transmembrane domain, type 1 (InterPro IPR011527), ABC transporter integral membrane type 1 (InterPro IPR017940), ABC transporter, transmembrane domain (InterPro IPR001140), ABC transporter, conserved site (InterPro IPR017871)	-	GO:0005575,GO:0005623,GO:0005886,GO:0016020,GO:0044464,GO:0071944	3.6.3.44	ko:K05658	ko02010,ko04976,ko05206,ko05226,map02010,map04976,map05206,map05226	-	-	-	ko00000,ko00001,ko01000,ko02000,ko04090,ko04147	3.A.1.201	-	-	ABC_membrane,ABC_tran	2
545	scaffold24065:298985-299982_0	4577.GRMZM2G146034_P01	7.69e-146	437	COG1132@1|root,KOG0055@2759|Eukaryota,37S69@33090|Viridiplantae,3GFBI@35493|Streptophyta,3KMMH@4447|Liliopsida,3I7H0@38820|Poales	35493|Streptophyta	Q	ABC transporter transmembrane region	-	GO:0006139,GO:0006163,GO:0006164,GO:0006725,GO:0006753,GO:0006754,GO:0006793,GO:0006796,GO:0006807,GO:0006810,GO:0006811,GO:0006812,GO:0008150,GO:0008152,GO:0009058,GO:0009117,GO:0009123,GO:0009124,GO:0009126,GO:0009127,GO:0009141,GO:0009142,GO:0009144,GO:0009145,GO:0009150,GO:0009152,GO:0009156,GO:0009161,GO:0009165,GO:0009167,GO:0009168,GO:0009199,GO:0009201,GO:0009205,GO:0009206,GO:0009259,GO:…	3.6.3.44	ko:K02114,ko:K05658	ko00190,ko00195,ko01100,ko02010,ko04976,ko05206,ko05226,map00190,map00195,map01100,map02010,map04976,map05206,map05226	M00157	-	-	ko00000,ko00001,ko00002,ko00194,ko01000,ko02000,ko04090,ko04147	3.A.1.201,3.A.2.1	-	-	ABC_membrane,ABC_tran	2
546	scaffold24065:300097-300463_0	3712.Bo9g008460.1	4.48e-56	178	COG1132@1|root,KOG0055@2759|Eukaryota,37S69@33090|Viridiplantae,3GFBI@35493|Streptophyta,3HNPD@3699|Brassicales	35493|Streptophyta	Q	Contains the following InterPro domains ATPase, AAA type, core (InterPro IPR003593), ABC transporter-like (InterPro IPR003439), ABC transporter, transmembrane domain, type 1 (InterPro IPR011527), ABC transporter integral membrane type 1 (InterPro IPR017940), ABC transporter, transmembrane domain (InterPro IPR001140), ABC transporter, conserved site (InterPro IPR017871)	-	-	-	-	-	-	-	-	-	-	-	-	ABC_tran	2
547	scaffold24274:237346-237741_0	4577.GRMZM2G065388_P03	4.39e-44	155	KOG1893@1|root,KOG1893@2759|Eukaryota,37KKQ@33090|Viridiplantae,3G726@35493|Streptophyta,3KMFF@4447|Liliopsida,3ID5H@38820|Poales	35493|Streptophyta	S	piezo-type mechanosensitive ion channel homolog	-	GO:0003674,GO:0005215,GO:0005216,GO:0005261,GO:0005575,GO:0006810,GO:0006811,GO:0006812,GO:0008150,GO:0008324,GO:0008381,GO:0009581,GO:0009582,GO:0009605,GO:0009612,GO:0009628,GO:0009987,GO:0015075,GO:0015267,GO:0015318,GO:0016020,GO:0022803,GO:0022836,GO:0022838,GO:0022857,GO:0022890,GO:0034220,GO:0042391,GO:0050896,GO:0050982,GO:0051179,GO:0051234,GO:0051606,GO:0051716,GO:0055085,GO:0065007,GO:…	-	ko:K22128	-	-	-	-	ko00000,ko02000,ko04131	1.A.75.1	-	-	Piezo_RRas_bdg	2
548	scaffold24274:237892-240503_0	13333.ERN12445	3.1e-276	842	KOG1893@1|root,KOG1893@2759|Eukaryota,37KKQ@33090|Viridiplantae,3G726@35493|Streptophyta	35493|Streptophyta	U	piezo-type mechanosensitive ion channel homolog	-	GO:0003674,GO:0005215,GO:0005216,GO:0005261,GO:0005575,GO:0006810,GO:0006811,GO:0006812,GO:0008150,GO:0008324,GO:0008381,GO:0009581,GO:0009582,GO:0009605,GO:0009612,GO:0009628,GO:0009987,GO:0015075,GO:0015267,GO:0015318,GO:0016020,GO:0022803,GO:0022836,GO:0022838,GO:0022857,GO:0022890,GO:0034220,GO:0042391,GO:0050896,GO:0050982,GO:0051179,GO:0051234,GO:0051606,GO:0051716,GO:0055085,GO:0065007,GO:…	-	ko:K22128	-	-	-	-	ko00000,ko02000,ko04131	1.A.75.1	-	-	Piezo_RRas_bdg	2
549	scaffold24274:240696-242285_0	13333.ERN12445	1.43e-160	513	KOG1893@1|root,KOG1893@2759|Eukaryota,37KKQ@33090|Viridiplantae,3G726@35493|Streptophyta	35493|Streptophyta	U	piezo-type mechanosensitive ion channel homolog	-	GO:0003674,GO:0005215,GO:0005216,GO:0005261,GO:0005575,GO:0006810,GO:0006811,GO:0006812,GO:0008150,GO:0008324,GO:0008381,GO:0009581,GO:0009582,GO:0009605,GO:0009612,GO:0009628,GO:0009987,GO:0015075,GO:0015267,GO:0015318,GO:0016020,GO:0022803,GO:0022836,GO:0022838,GO:0022857,GO:0022890,GO:0034220,GO:0042391,GO:0050896,GO:0050982,GO:0051179,GO:0051234,GO:0051606,GO:0051716,GO:0055085,GO:0065007,GO:…	-	ko:K22128	-	-	-	-	ko00000,ko02000,ko04131	1.A.75.1	-	-	Piezo_RRas_bdg	2
550	scaffold24274:242567-242803_0	38727.Pavir.J27849.1.p	1.82e-12	67.8	KOG1893@1|root,KOG1893@2759|Eukaryota,37KKQ@33090|Viridiplantae,3G726@35493|Streptophyta,3M37K@4447|Liliopsida,3IPKU@38820|Poales	35493|Streptophyta	S	piezo-type mechanosensitive ion channel homolog	-	GO:0003674,GO:0005215,GO:0005216,GO:0005261,GO:0005575,GO:0006810,GO:0006811,GO:0006812,GO:0008150,GO:0008324,GO:0008381,GO:0009581,GO:0009582,GO:0009605,GO:0009612,GO:0009628,GO:0009987,GO:0015075,GO:0015267,GO:0015318,GO:0016020,GO:0022803,GO:0022836,GO:0022838,GO:0022857,GO:0022890,GO:0034220,GO:0042391,GO:0050896,GO:0050982,GO:0051179,GO:0051234,GO:0051606,GO:0051716,GO:0055085,GO:0065007,GO:…	-	ko:K22128	-	-	-	-	ko00000,ko02000,ko04131	1.A.75.1	-	-	Piezo_RRas_bdg	2
551	scaffold24279:63152-65623_0	42345.XP_008802215.1	1.31e-273	784	KOG4197@1|root,KOG4197@2759|Eukaryota,37PUK@33090|Viridiplantae,3G8CV@35493|Streptophyta,3KQS3@4447|Liliopsida	35493|Streptophyta	C	DYW family of nucleic acid deaminases	-	GO:0003674,GO:0003676,GO:0003723,GO:0003824,GO:0004518,GO:0004519,GO:0005488,GO:0005575,GO:0005622,GO:0005623,GO:0006139,GO:0006725,GO:0006807,GO:0008150,GO:0008152,GO:0009451,GO:0009987,GO:0016070,GO:0016787,GO:0016788,GO:0034641,GO:0043170,GO:0043226,GO:0043227,GO:0043229,GO:0043231,GO:0043412,GO:0044237,GO:0044238,GO:0044424,GO:0044464,GO:0046483,GO:0071704,GO:0090304,GO:0090305,GO:0097159,GO:…	-	-	-	-	-	-	-	-	-	-	DYW_deaminase,PPR,PPR_2	2
552	scaffold24279:65018-65623_0	4432.XP_010249212.1	2.76e-19	93.2	KOG4197@1|root,KOG4197@2759|Eukaryota,37PUK@33090|Viridiplantae,3G8CV@35493|Streptophyta	35493|Streptophyta	U	Pentatricopeptide repeat-containing protein	-	GO:0003674,GO:0003676,GO:0003723,GO:0003824,GO:0004518,GO:0004519,GO:0005488,GO:0005575,GO:0005622,GO:0005623,GO:0006139,GO:0006725,GO:0006807,GO:0008150,GO:0008152,GO:0009451,GO:0009987,GO:0016070,GO:0016787,GO:0016788,GO:0034641,GO:0043170,GO:0043226,GO:0043227,GO:0043229,GO:0043231,GO:0043412,GO:0044237,GO:0044238,GO:0044424,GO:0044464,GO:0046483,GO:0071704,GO:0090304,GO:0090305,GO:0097159,GO:…	-	-	-	-	-	-	-	-	-	-	DYW_deaminase,PPR,PPR_2	2
553	scaffold2466:316276-316648_0	3988.XP_002528524.1	5.19e-15	74.3	COG0639@1|root,KOG0376@2759|Eukaryota,37KC8@33090|Viridiplantae,3GDZR@35493|Streptophyta,4JITF@91835|fabids	35493|Streptophyta	L	Serine threonine-protein phosphatase	-	GO:0003674,GO:0003824,GO:0004721,GO:0004722,GO:0005575,GO:0005622,GO:0005623,GO:0005634,GO:0006464,GO:0006470,GO:0006793,GO:0006796,GO:0006807,GO:0006950,GO:0007154,GO:0007165,GO:0008150,GO:0008152,GO:0009266,GO:0009314,GO:0009408,GO:0009416,GO:0009628,GO:0009637,GO:0009785,GO:0009987,GO:0016311,GO:0016787,GO:0016788,GO:0016791,GO:0019538,GO:0023052,GO:0030522,GO:0036211,GO:0042578,GO:0043170,GO:…	3.1.3.16	ko:K04460,ko:K15423	ko04010,ko04922,map04010,map04922	-	-	-	ko00000,ko00001,ko01000,ko01009,ko03400	-	-	-	Metallophos,PMD	2
554	scaffold2466:317313-317677_0	88036.EFJ09191	6.67e-19	84.7	2CMK0@1|root,2QQM5@2759|Eukaryota,37HG9@33090|Viridiplantae,3G9V1@35493|Streptophyta	35493|Streptophyta	S	Rhamnogalacturonate lyase	-	-	4.2.2.23	ko:K18195	-	-	-	-	ko00000,ko01000	-	PL4	-	CBM-like,Rhamnogal_lyase,fn3_3	2
555	scaffold25147:51166-51304_0	981085.XP_010090741.1	1.44e-12	63.2	COG0451@1|root,KOG1502@2759|Eukaryota,37J0J@33090|Viridiplantae,3G9PM@35493|Streptophyta,4JF4V@91835|fabids	35493|Streptophyta	V	Tetraketide alpha-pyrone reductase	-	GO:0000003,GO:0003006,GO:0005575,GO:0005622,GO:0005623,GO:0005737,GO:0005783,GO:0006725,GO:0007275,GO:0008150,GO:0008152,GO:0009058,GO:0009555,GO:0009653,GO:0009791,GO:0009987,GO:0010154,GO:0010208,GO:0010584,GO:0010927,GO:0012505,GO:0016043,GO:0019438,GO:0022414,GO:0022607,GO:0030198,GO:0032501,GO:0032502,GO:0032989,GO:0043062,GO:0043226,GO:0043227,GO:0043229,GO:0043231,GO:0044085,GO:0044237,GO:…	-	-	-	-	-	-	-	-	-	-	Epimerase,UFD1	2
556	scaffold25147:51432-51624_0	77586.LPERR09G11120.1	6.39e-21	89.4	COG0451@1|root,KOG1502@2759|Eukaryota,37J0J@33090|Viridiplantae,3G9PM@35493|Streptophyta,3KUWE@4447|Liliopsida,3IERF@38820|Poales	35493|Streptophyta	V	NAD dependent epimerase/dehydratase family	-	GO:0000003,GO:0003006,GO:0005575,GO:0005622,GO:0005623,GO:0005737,GO:0005783,GO:0006725,GO:0007275,GO:0008150,GO:0008152,GO:0009058,GO:0009555,GO:0009653,GO:0009791,GO:0009987,GO:0010154,GO:0010208,GO:0010584,GO:0010927,GO:0012505,GO:0016043,GO:0019438,GO:0022414,GO:0022607,GO:0030198,GO:0032501,GO:0032502,GO:0032989,GO:0043062,GO:0043226,GO:0043227,GO:0043229,GO:0043231,GO:0044085,GO:0044237,GO:…	-	-	-	-	-	-	-	-	-	-	Epimerase,UFD1	2
557	scaffold25147:52321-52483_0	981085.XP_010090742.1	5.79e-24	95.5	COG0451@1|root,KOG1502@2759|Eukaryota,37J0J@33090|Viridiplantae,3G9PM@35493|Streptophyta,4JF4V@91835|fabids	35493|Streptophyta	V	Tetraketide alpha-pyrone reductase	-	-	-	-	-	-	-	-	-	-	-	-	Epimerase,UFD1	2
558	scaffold25147:53570-53758_0	981085.XP_010090742.1	6.64e-29	108	COG0451@1|root,KOG1502@2759|Eukaryota,37J0J@33090|Viridiplantae,3G9PM@35493|Streptophyta,4JF4V@91835|fabids	35493|Streptophyta	V	Tetraketide alpha-pyrone reductase	-	-	-	-	-	-	-	-	-	-	-	-	Epimerase,UFD1	2
559	scaffold25147:55345-55514_0	81985.XP_006285156.1	4.49e-22	88.6	COG0451@1|root,KOG1502@2759|Eukaryota,37J0J@33090|Viridiplantae,3G9PM@35493|Streptophyta	35493|Streptophyta	V	Tetraketide alpha-pyrone reductase	-	GO:0000003,GO:0003006,GO:0005575,GO:0005622,GO:0005623,GO:0005737,GO:0005783,GO:0006725,GO:0007275,GO:0008150,GO:0008152,GO:0009058,GO:0009555,GO:0009653,GO:0009791,GO:0009987,GO:0010154,GO:0010208,GO:0010584,GO:0010927,GO:0012505,GO:0016043,GO:0019438,GO:0022414,GO:0022607,GO:0030198,GO:0032501,GO:0032502,GO:0032989,GO:0043062,GO:0043226,GO:0043227,GO:0043229,GO:0043231,GO:0044085,GO:0044237,GO:…	-	-	-	-	-	-	-	-	-	-	Epimerase,UFD1	2
560	scaffold25147:55607-55763_0	3750.XP_008354953.1	9.62e-12	63.2	COG0451@1|root,KOG1502@2759|Eukaryota	3750.XP_008354953.1|-	GM	dihydrokaempferol 4-reductase activity	-	-	-	-	-	-	-	-	-	-	-	-	-	2
561	scaffold25194:132932-133242_0	42345.XP_008803652.1	2.67e-26	102	28IYG@1|root,2QRA4@2759|Eukaryota	2759|Eukaryota	S	carbohydrate binding	-	GO:0003674,GO:0005488,GO:0005575,GO:0005622,GO:0005623,GO:0005634,GO:0005737,GO:0030246,GO:0043226,GO:0043227,GO:0043229,GO:0043231,GO:0044424,GO:0044464	-	-	-	-	-	-	-	-	-	-	F-box,F-box-like,PP2	2
562	scaffold25239:103092-103312_0	13333.ERN09503	1.25e-27	108	COG0692@1|root,KOG2994@2759|Eukaryota,37IR7@33090|Viridiplantae,3GECZ@35493|Streptophyta	35493|Streptophyta	L	Excises uracil residues from the DNA which can arise as a result of misincorporation of dUMP residues by DNA polymerase or due to deamination of cytosine	-	GO:0003674,GO:0003824,GO:0004844,GO:0005575,GO:0005622,GO:0005623,GO:0005737,GO:0005739,GO:0006139,GO:0006259,GO:0006281,GO:0006284,GO:0006285,GO:0006725,GO:0006807,GO:0006950,GO:0006974,GO:0008150,GO:0008152,GO:0009987,GO:0016787,GO:0016798,GO:0016799,GO:0019104,GO:0033554,GO:0034641,GO:0043170,GO:0043226,GO:0043227,GO:0043229,GO:0043231,GO:0044237,GO:0044238,GO:0044260,GO:0044424,GO:0044444,GO:…	3.2.2.27	ko:K03648	ko03410,ko05340,map03410,map05340	-	-	-	ko00000,ko00001,ko01000,ko03400	-	-	-	UDG	2
563	scaffold25239:103642-103800_0	85681.XP_006420662.1	2.2e-26	102	COG0692@1|root,KOG2994@2759|Eukaryota,37IR7@33090|Viridiplantae,3GECZ@35493|Streptophyta	35493|Streptophyta	L	Excises uracil residues from the DNA which can arise as a result of misincorporation of dUMP residues by DNA polymerase or due to deamination of cytosine	-	GO:0003674,GO:0003824,GO:0004844,GO:0005575,GO:0005622,GO:0005623,GO:0005737,GO:0005739,GO:0006139,GO:0006259,GO:0006281,GO:0006284,GO:0006285,GO:0006725,GO:0006807,GO:0006950,GO:0006974,GO:0008150,GO:0008152,GO:0009987,GO:0016787,GO:0016798,GO:0016799,GO:0019104,GO:0033554,GO:0034641,GO:0043170,GO:0043226,GO:0043227,GO:0043229,GO:0043231,GO:0044237,GO:0044238,GO:0044260,GO:0044424,GO:0044444,GO:…	3.2.2.27	ko:K03648	ko03410,ko05340,map03410,map05340	-	-	-	ko00000,ko00001,ko01000,ko03400	-	-	-	UDG	2
564	scaffold25330:73779-74751_0	4432.XP_010259481.1	2.65e-47	175	COG4677@1|root,2QVXG@2759|Eukaryota,37MYY@33090|Viridiplantae,3GF3A@35493|Streptophyta	35493|Streptophyta	G	pectinesterase	-	GO:0003674,GO:0003824,GO:0004857,GO:0005575,GO:0005623,GO:0006950,GO:0006952,GO:0008150,GO:0009605,GO:0009607,GO:0009617,GO:0016787,GO:0016788,GO:0030234,GO:0030599,GO:0042742,GO:0043086,GO:0043207,GO:0044092,GO:0044464,GO:0046910,GO:0050790,GO:0050829,GO:0050896,GO:0051704,GO:0051707,GO:0052689,GO:0065007,GO:0065009,GO:0071944,GO:0098542,GO:0098772	3.1.1.11	ko:K01051	ko00040,ko01100,map00040,map01100	M00081	R02362	RC00460,RC00461	ko00000,ko00001,ko00002,ko01000	-	-	-	PMEI,Pectinesterase	2
565	scaffold25330:74982-75664_0	3983.cassava4.1_023656m	1.4e-99	305	COG4677@1|root,2QSQ4@2759|Eukaryota,37S65@33090|Viridiplantae,3GCDB@35493|Streptophyta,4JKXV@91835|fabids	35493|Streptophyta	G	Acts in the modification of cell walls via demethylesterification of cell wall pectin	-	GO:0003674,GO:0003824,GO:0004857,GO:0005575,GO:0005623,GO:0008150,GO:0016787,GO:0016788,GO:0030234,GO:0030599,GO:0043086,GO:0044092,GO:0044464,GO:0046910,GO:0050790,GO:0052689,GO:0065007,GO:0065009,GO:0071944,GO:0098772	3.1.1.11	ko:K01051	ko00040,ko01100,map00040,map01100	M00081	R02362	RC00460,RC00461	ko00000,ko00001,ko00002,ko01000	-	-	-	PMEI,Pectinesterase	2
566	scaffold25517:47312-47551_0	3827.XP_004503496.1	5.77e-31	118	COG4677@1|root,2QQMT@2759|Eukaryota,37N2J@33090|Viridiplantae,3GC93@35493|Streptophyta,4JIXR@91835|fabids	35493|Streptophyta	G	pectinesterase	-	GO:0005575,GO:0005618,GO:0005622,GO:0005623,GO:0005737,GO:0030312,GO:0044424,GO:0044464,GO:0071944	3.1.1.11	ko:K01051	ko00040,ko01100,map00040,map01100	M00081	R02362	RC00460,RC00461	ko00000,ko00001,ko00002,ko01000	-	-	-	Pectinesterase	2
567	scaffold25587:122140-122551_0	3218.PP1S4_43V6.3	3.16e-40	143	COG2273@1|root,2QSMA@2759|Eukaryota,37RXU@33090|Viridiplantae,3G9QH@35493|Streptophyta	35493|Streptophyta	G	Catalyzes xyloglucan endohydrolysis (XEH) and or endotransglycosylation (XET). Cleaves and religates xyloglucan polymers, an essential constituent of the primary cell wall, and thereby participates in cell wall construction of growing tissues	XTH7	GO:0001101,GO:0006950,GO:0008150,GO:0009414,GO:0009415,GO:0009628,GO:0010035,GO:0042221,GO:0050896,GO:1901700	2.4.1.207	ko:K08235	-	-	-	-	ko00000,ko01000	-	-	-	Glyco_hydro_16,XET_C	2
568	scaffold25587:122664-122860_0	88036.EFJ08697	1.23e-25	102	COG2273@1|root,2QRCC@2759|Eukaryota,37HNT@33090|Viridiplantae,3GAM2@35493|Streptophyta	35493|Streptophyta	G	Catalyzes xyloglucan endohydrolysis (XEH) and or endotransglycosylation (XET). Cleaves and religates xyloglucan polymers, an essential constituent of the primary cell wall, and thereby participates in cell wall construction of growing tissues	-	-	2.4.1.207	ko:K08235	-	-	-	-	ko00000,ko01000	-	-	-	Glyco_hydro_16,XET_C	2
569	scaffold25692:107053-108189_0	13333.ERN11775	4.56e-27	118	COG5068@1|root,KOG0014@2759|Eukaryota,37WBM@33090|Viridiplantae,3GK6I@35493|Streptophyta	35493|Streptophyta	K	Agamous-like MADS-box protein	-	-	-	-	-	-	-	-	-	-	-	-	SRF-TF	2
570	scaffold25712:145054-145196_0	4113.PGSC0003DMT400001429	1.02e-19	83.6	COG1012@1|root,KOG2450@2759|Eukaryota,37YAH@33090|Viridiplantae,3GNTK@35493|Streptophyta,44SZC@71274|asterids	35493|Streptophyta	C	Aldehyde dehydrogenase family 2 member B7, mitochondrial-like	-	-	1.2.1.3	ko:K00128	ko00010,ko00053,ko00071,ko00280,ko00310,ko00330,ko00340,ko00380,ko00410,ko00561,ko00620,ko00625,ko00903,ko00981,ko01100,ko01110,ko01120,ko01130,map00010,map00053,map00071,map00280,map00310,map00330,map00340,map00380,map00410,map00561,map00620,map00625,map00903,map00981,map01100,map01110,map01120,map01130	M00135	R00264,R00631,R00710,R00904,R01752,R01986,R02549,R02678,R02940,R02957,R03283,R03869,R04065,R04506,R04903,R05050,R05237,R05238,R05286,R06366,R08146	RC00047,RC00071,RC00080,RC00186,RC00218,RC00242,RC00816,RC01500	ko00000,ko00001,ko00002,ko01000	-	-	-	Aldedh	2
571	scaffold25915:131052-133901_0	3694.POPTR_0001s41560.1	9.79e-29	127	KOG4658@1|root,KOG4658@2759|Eukaryota,37T06@33090|Viridiplantae,3GEKP@35493|Streptophyta,4JN9P@91835|fabids	35493|Streptophyta	T	Belongs to the disease resistance NB-LRR family	-	GO:0005575,GO:0005623,GO:0005886,GO:0006950,GO:0006952,GO:0007154,GO:0007165,GO:0008150,GO:0009605,GO:0009607,GO:0009617,GO:0009987,GO:0016020,GO:0023052,GO:0043207,GO:0044464,GO:0050789,GO:0050794,GO:0050896,GO:0051704,GO:0051707,GO:0051716,GO:0065007,GO:0071944	-	ko:K13459	ko04626,map04626	-	-	-	ko00000,ko00001	-	-	-	LRR_8,NB-ARC	2
572	scaffold25930:10930-11794_0	981085.XP_010109546.1	1.82e-35	137	COG0515@1|root,2RN3P@2759|Eukaryota,37Y4U@33090|Viridiplantae,3G955@35493|Streptophyta	35493|Streptophyta	T	Cysteine-rich receptor-like protein kinase	-	-	-	-	-	-	-	-	-	-	-	-	Motile_Sperm,Pkinase,Pkinase_Tyr,Stress-antifung	2
573	scaffold27233:47065-47415_0	3750.XP_008374543.1	2.52e-27	103	28J40@1|root,2S2AW@2759|Eukaryota,37V8Z@33090|Viridiplantae,3GM58@35493|Streptophyta,4JQIM@91835|fabids	35493|Streptophyta	S	Mini zinc finger protein	-	GO:0001101,GO:0003674,GO:0003676,GO:0003677,GO:0005488,GO:0005515,GO:0005575,GO:0005622,GO:0005623,GO:0005634,GO:0005737,GO:0006355,GO:0007275,GO:0008150,GO:0009314,GO:0009416,GO:0009628,GO:0009639,GO:0009640,GO:0009719,GO:0009725,GO:0009733,GO:0009735,GO:0009737,GO:0009739,GO:0009741,GO:0009791,GO:0009889,GO:0009890,GO:0009892,GO:0010033,GO:0010468,GO:0010556,GO:0010558,GO:0010605,GO:0010629,GO:…	-	-	-	-	-	-	-	-	-	-	ZF-HD_dimer	2
574	scaffold27330:91103-93724_0	3218.PP1S13_264V6.1	1.72e-215	635	KOG4197@1|root,KOG4197@2759|Eukaryota,37M8J@33090|Viridiplantae,3GA8V@35493|Streptophyta	2759|Eukaryota	S	Pentatricopeptide repeat-containing protein	-	-	-	-	-	-	-	-	-	-	-	-	PPR_2	2
575	scaffold27853:62405-62945_0	4641.GSMUA_Achr10P12740_001	5.03e-82	254	COG1087@1|root,KOG1371@2759|Eukaryota,37K7E@33090|Viridiplantae,3GC4F@35493|Streptophyta,3KSA5@4447|Liliopsida	35493|Streptophyta	M	GDP-mannose 4,6 dehydratase	SQD1	GO:0003674,GO:0003824,GO:0005488,GO:0005515,GO:0005575,GO:0005622,GO:0005623,GO:0005737,GO:0006629,GO:0006643,GO:0006664,GO:0006950,GO:0007154,GO:0008146,GO:0008150,GO:0008152,GO:0008270,GO:0008610,GO:0009058,GO:0009247,GO:0009267,GO:0009507,GO:0009532,GO:0009536,GO:0009570,GO:0009605,GO:0009987,GO:0009991,GO:0016036,GO:0016740,GO:0016782,GO:0019899,GO:0019904,GO:0031667,GO:0031668,GO:0031669,GO:…	3.13.1.1	ko:K06118	ko00520,ko00561,map00520,map00561	-	R05775	RC01469	ko00000,ko00001,ko01000	-	-	-	Epimerase	2
576	scaffold27981:36722-38935_0	4432.XP_010278229.1	1.45e-161	491	KOG4197@1|root,KOG4197@2759|Eukaryota,37KHG@33090|Viridiplantae,3GB5Q@35493|Streptophyta	35493|Streptophyta	Q	Pentatricopeptide repeat-containing protein	-	GO:0003674,GO:0003676,GO:0003723,GO:0003824,GO:0004518,GO:0004519,GO:0005488,GO:0005575,GO:0005622,GO:0005623,GO:0006139,GO:0006725,GO:0006807,GO:0008150,GO:0008152,GO:0009451,GO:0009987,GO:0016070,GO:0016787,GO:0016788,GO:0034641,GO:0043170,GO:0043226,GO:0043227,GO:0043229,GO:0043231,GO:0043412,GO:0044237,GO:0044238,GO:0044424,GO:0044464,GO:0046483,GO:0071704,GO:0090304,GO:0090305,GO:0097159,GO:…	-	-	-	-	-	-	-	-	-	-	DYW_deaminase,PPR	2
577	scaffold28146:16591-17127_0	88036.EFJ27650	3.28e-75	235	COG5059@1|root,KOG0242@2759|Eukaryota,37KMY@33090|Viridiplantae	33090|Viridiplantae	Z	Belongs to the TRAFAC class myosin-kinesin ATPase superfamily. Kinesin family	-	GO:0000070,GO:0000226,GO:0000278,GO:0000280,GO:0000775,GO:0000776,GO:0000779,GO:0000793,GO:0000819,GO:0001932,GO:0001934,GO:0002376,GO:0002478,GO:0002495,GO:0002504,GO:0003674,GO:0003774,GO:0003777,GO:0003824,GO:0005488,GO:0005515,GO:0005575,GO:0005622,GO:0005623,GO:0005634,GO:0005654,GO:0005694,GO:0005737,GO:0005819,GO:0005828,GO:0005829,GO:0005856,GO:0005871,GO:0005874,GO:0005875,GO:0005876,GO:…	-	ko:K11498	-	-	-	-	ko00000,ko01009,ko03036	-	-	-	Kinesin	2
578	scaffold28146:17310-17723_0	4641.GSMUA_Achr10P28120_001	9.87e-19	88.6	COG0571@1|root,KOG0701@2759|Eukaryota,37INP@33090|Viridiplantae,3GDT6@35493|Streptophyta,3KN3A@4447|Liliopsida	2759|Eukaryota	A	Belongs to the helicase family. Dicer subfamily	-	-	-	ko:K11592	ko05206,map05206	-	-	-	ko00000,ko00001,ko01000,ko03036	-	-	-	CLASP_N,DEAD,Dicer_dimer,Helicase_C,PAZ,Ribonuclease_3	2
579	scaffold28275:50265-50909_0	4530.OS05T0137200-01	4.18e-102	307	COG1132@1|root,KOG0055@2759|Eukaryota,37HZ5@33090|Viridiplantae,3G9FQ@35493|Streptophyta	35493|Streptophyta	Q	ABC transporter B family member	-	GO:0003674,GO:0003824,GO:0005215,GO:0005575,GO:0005622,GO:0005623,GO:0005737,GO:0005773,GO:0005774,GO:0005886,GO:0005911,GO:0006810,GO:0006855,GO:0007275,GO:0008150,GO:0008559,GO:0009506,GO:0009605,GO:0009606,GO:0009628,GO:0009629,GO:0009630,GO:0009653,GO:0009719,GO:0009725,GO:0009733,GO:0009735,GO:0009888,GO:0009914,GO:0009926,GO:0009966,GO:0009987,GO:0010015,GO:0010033,GO:0010053,GO:0010054,GO:…	3.6.3.44	ko:K05658	ko02010,ko04976,ko05206,ko05226,map02010,map04976,map05206,map05226	-	-	-	ko00000,ko00001,ko01000,ko02000,ko04090,ko04147	3.A.1.201	-	-	ABC_membrane,ABC_tran	2
580	scaffold28275:51061-51324_0	90675.XP_010497210.1	2.6e-26	106	COG1132@1|root,KOG0055@2759|Eukaryota,37HZ5@33090|Viridiplantae,3G9FQ@35493|Streptophyta,3HYFM@3699|Brassicales	35493|Streptophyta	Q	ABC transporter B family member	-	GO:0003674,GO:0003824,GO:0005215,GO:0005575,GO:0005623,GO:0005886,GO:0005911,GO:0006810,GO:0006855,GO:0007275,GO:0008150,GO:0008559,GO:0009506,GO:0009605,GO:0009606,GO:0009628,GO:0009629,GO:0009630,GO:0009653,GO:0009719,GO:0009725,GO:0009733,GO:0009735,GO:0009888,GO:0009914,GO:0009926,GO:0009966,GO:0009987,GO:0010015,GO:0010033,GO:0010053,GO:0010054,GO:0010315,GO:0010328,GO:0010329,GO:0010540,GO:…	3.6.3.44	ko:K05658	ko02010,ko04976,ko05206,ko05226,map02010,map04976,map05206,map05226	-	-	-	ko00000,ko00001,ko01000,ko02000,ko04090,ko04147	3.A.1.201	-	-	ABC_membrane,ABC_tran	2
581	scaffold28275:51587-51853_0	4530.OS05T0137200-01	7.57e-27	108	COG1132@1|root,KOG0055@2759|Eukaryota,37HZ5@33090|Viridiplantae,3G9FQ@35493|Streptophyta	35493|Streptophyta	Q	ABC transporter B family member	-	GO:0003674,GO:0003824,GO:0005215,GO:0005575,GO:0005622,GO:0005623,GO:0005737,GO:0005773,GO:0005774,GO:0005886,GO:0005911,GO:0006810,GO:0006855,GO:0007275,GO:0008150,GO:0008559,GO:0009506,GO:0009605,GO:0009606,GO:0009628,GO:0009629,GO:0009630,GO:0009653,GO:0009719,GO:0009725,GO:0009733,GO:0009735,GO:0009888,GO:0009914,GO:0009926,GO:0009966,GO:0009987,GO:0010015,GO:0010033,GO:0010053,GO:0010054,GO:…	3.6.3.44	ko:K05658	ko02010,ko04976,ko05206,ko05226,map02010,map04976,map05206,map05226	-	-	-	ko00000,ko00001,ko01000,ko02000,ko04090,ko04147	3.A.1.201	-	-	ABC_membrane,ABC_tran	2
582	scaffold28275:52509-52737_0	71139.XP_010041548.1	7.21e-23	92.8	COG1132@1|root,KOG0055@2759|Eukaryota,37HZ5@33090|Viridiplantae,3G9FQ@35493|Streptophyta	35493|Streptophyta	Q	ABC transporter B family member	-	-	3.6.3.44	ko:K05658	ko02010,ko04976,ko05206,ko05226,map02010,map04976,map05206,map05226	-	-	-	ko00000,ko00001,ko01000,ko02000,ko04090,ko04147	3.A.1.201	-	-	ABC_membrane,ABC_tran	2
583	scaffold28275:52869-53508_0	3694.POPTR_0228s00200.1	2.44e-47	173	COG1132@1|root,COG2801@1|root,KOG0017@2759|Eukaryota,KOG0055@2759|Eukaryota,37HZ5@33090|Viridiplantae,3G9FQ@35493|Streptophyta,4JKXQ@91835|fabids	35493|Streptophyta	Q	ABC transporter B family member	-	-	3.6.3.44	ko:K05658	ko02010,ko04976,ko05206,ko05226,map02010,map04976,map05206,map05226	-	-	-	ko00000,ko00001,ko01000,ko02000,ko04090,ko04147	3.A.1.201	-	-	ABC_membrane,ABC_tran	2
584	scaffold28275:53761-54034_0	4530.OS01T0290700-01	2.05e-41	139	COG1132@1|root,KOG0055@2759|Eukaryota,37HZ5@33090|Viridiplantae,3G9FQ@35493|Streptophyta,3KMD4@4447|Liliopsida,3I45V@38820|Poales	35493|Streptophyta	Q	ABC transporter transmembrane region	-	GO:0003674,GO:0003824,GO:0005215,GO:0005575,GO:0005622,GO:0005623,GO:0005737,GO:0005773,GO:0005774,GO:0005886,GO:0005911,GO:0006810,GO:0006855,GO:0007275,GO:0008150,GO:0008559,GO:0009506,GO:0009605,GO:0009606,GO:0009628,GO:0009629,GO:0009630,GO:0009653,GO:0009719,GO:0009725,GO:0009733,GO:0009735,GO:0009888,GO:0009914,GO:0009926,GO:0009966,GO:0009987,GO:0010015,GO:0010033,GO:0010053,GO:0010054,GO:…	3.6.3.44	ko:K05658	ko02010,ko04976,ko05206,ko05226,map02010,map04976,map05206,map05226	-	-	-	ko00000,ko00001,ko01000,ko02000,ko04090,ko04147	3.A.1.201	-	-	ABC_membrane,ABC_tran	2
585	scaffold28275:54148-54673_0	3983.cassava4.1_025686m	3.5e-90	281	COG1132@1|root,KOG0055@2759|Eukaryota,37HZ5@33090|Viridiplantae,3G9FQ@35493|Streptophyta,4JKXQ@91835|fabids	35493|Streptophyta	Q	ABC transporter B family member	-	-	3.6.3.44	ko:K05658	ko02010,ko04976,ko05206,ko05226,map02010,map04976,map05206,map05226	-	-	-	ko00000,ko00001,ko01000,ko02000,ko04090,ko04147	3.A.1.201	-	-	ABC_membrane,ABC_tran	2
586	scaffold28275:54809-55047_0	38727.Pavir.Ea01033.1.p	1.41e-24	99.8	COG1132@1|root,KOG0055@2759|Eukaryota,37HZ5@33090|Viridiplantae,3G9FQ@35493|Streptophyta,3KMD4@4447|Liliopsida,3I45V@38820|Poales	35493|Streptophyta	Q	ABC transporter transmembrane region	-	GO:0003674,GO:0003824,GO:0005215,GO:0005575,GO:0005622,GO:0005623,GO:0005737,GO:0005773,GO:0005774,GO:0005886,GO:0005911,GO:0006810,GO:0006855,GO:0007275,GO:0008150,GO:0008559,GO:0009506,GO:0009605,GO:0009606,GO:0009628,GO:0009629,GO:0009630,GO:0009653,GO:0009719,GO:0009725,GO:0009733,GO:0009735,GO:0009888,GO:0009914,GO:0009926,GO:0009966,GO:0009987,GO:0010015,GO:0010033,GO:0010053,GO:0010054,GO:…	3.6.3.44	ko:K05658	ko02010,ko04976,ko05206,ko05226,map02010,map04976,map05206,map05226	-	-	-	ko00000,ko00001,ko01000,ko02000,ko04090,ko04147	3.A.1.201	-	-	ABC_membrane,ABC_tran	2
587	scaffold28275:55201-55422_0	38727.Pavir.Ea01033.1.p	1.43e-21	91.7	COG1132@1|root,KOG0055@2759|Eukaryota,37HZ5@33090|Viridiplantae,3G9FQ@35493|Streptophyta,3KMD4@4447|Liliopsida,3I45V@38820|Poales	35493|Streptophyta	Q	ABC transporter transmembrane region	-	GO:0003674,GO:0003824,GO:0005215,GO:0005575,GO:0005622,GO:0005623,GO:0005737,GO:0005773,GO:0005774,GO:0005886,GO:0005911,GO:0006810,GO:0006855,GO:0007275,GO:0008150,GO:0008559,GO:0009506,GO:0009605,GO:0009606,GO:0009628,GO:0009629,GO:0009630,GO:0009653,GO:0009719,GO:0009725,GO:0009733,GO:0009735,GO:0009888,GO:0009914,GO:0009926,GO:0009966,GO:0009987,GO:0010015,GO:0010033,GO:0010053,GO:0010054,GO:…	3.6.3.44	ko:K05658	ko02010,ko04976,ko05206,ko05226,map02010,map04976,map05206,map05226	-	-	-	ko00000,ko00001,ko01000,ko02000,ko04090,ko04147	3.A.1.201	-	-	ABC_membrane,ABC_tran	2
588	scaffold2905:21828-22874_0	4432.XP_010250361.1	6.54e-103	313	KOG1072@1|root,KOG1072@2759|Eukaryota,37QJ7@33090|Viridiplantae,3GESE@35493|Streptophyta	35493|Streptophyta	S	F-box kelch-repeat protein	-	GO:0000151,GO:0003674,GO:0005488,GO:0005515,GO:0005575,GO:0005622,GO:0005623,GO:0005737,GO:0005829,GO:0006508,GO:0006511,GO:0006807,GO:0008150,GO:0008152,GO:0009056,GO:0009057,GO:0009966,GO:0009968,GO:0009987,GO:0010498,GO:0010646,GO:0010648,GO:0019005,GO:0019222,GO:0019538,GO:0019899,GO:0019941,GO:0023051,GO:0023057,GO:0030162,GO:0030163,GO:0031323,GO:0031461,GO:0031625,GO:0032991,GO:0043161,GO:…	-	-	-	-	-	-	-	-	-	-	F-box,Kelch_1,Kelch_6	2
[truncated: 1,605 more rows]

## Sheet: Table S5 Variable Names
Column Name	Descrioption
query	Coding region based on Pinus taeda Annotation that was queried in eggnog
seed_ortholog	The ortholog that eggnog uses to used to fetch fine-grained orthology relationships
evalue	evalue for the matching between the query sequence and seed orhtology
score	alignment score between query sequence and seed ortholog
eggNOG_OGs	Other orthologs identified across different taxa
max_annot_lvl	Finest taxonimc level the ortholog was able to be identified to
COG_category	COG functional category inferred from best matching OG
Description	The protein(s) that are produced by the ortholog identifed
[truncated: 14 more rows]
